# Supplementary material for: Huangbai Liniment Accelerated Wound Healing by Activating Nrf2 Signaling in Diabetes
Source: Oxid Med Cell Longev. 2020 May 23;2020:4951820. doi: 10.1155/2020/4951820 (PMC7271242; doi:10.1155/2020/4951820)
Supplement: Supplementary Materials — Table S1. The RNA-seq data of nondiabetic wound (Con), STZ-induced diabetic wound with or without HB treatment. The gene expressions of different ss were expressed as FPKM and the fold change and false discovery rate (FDR). [file 4951820.f1.xlsx]

## Sheet: Rna-seq result
FPKM
Gene_Id	gene_name	Con_1	Con_2	Con_3	STZ_1	STZ_2	STZ_3	STZ_HB_1	STZ_HB_2	STZ_HB_3
ENSRNOG00000034234	Mt-co1	12370.9	12946.3	12484.2	8796.6	9133.44	8941.8	9627.71	9839.08	10148.6
ENSRNOG00000030700	Mt-cox3	8702.79	9429.68	8814.91	7688.04	7517.65	7462.19	7636.95	7944.43	8360.31
ENSRNOG00000031979	Mt-atp6	8518.12	9120.8	8559.69	6967.14	7105.43	7003.97	7128.1	7666.44	8091.68
ENSRNOG00000017786	Acta1	3404.51	3341.83	3626.44	6683.56	6158.23	6607.12	13229	13102.3	12699
ENSRNOG00000003897	Col1a1	8699.81	8128.85	8727.42	6533.45	6542.49	6618.47	3071.88	3053.13	2905.91
ENSRNOG00000040350	Mir675	1907.78	1983.88	2047.89	5730.5	5067	5728.42	8378.88	8200.14	8247.71
ENSRNOG00000018454	Apoe	5271.98	4977.95	5137.55	4455.03	4219.15	4286.59	5176.23	4863.4	4674.31
ENSRNOG00000012840	Sparc	4815.84	4754.26	4862.14	4789.97	4819.09	4899.79	2764.04	2654.99	2647.43
ENSRNOG00000031766	Mt-cyb	4577.58	4810.33	4512.78	3400.34	3425.17	3351.11	3480.72	3704.9	3860.14
ENSRNOG00000003357	Col3a1	3850.98	3755.05	3738.72	4656.63	4575.44	4574.78	2268.39	2347.15	2327.11
ENSRNOG00000047931	Tmsb4x	3671.34	3971.62	3631.22	3403.82	3554.32	3448.16	2990.76	2925.46	2953.88
ENSRNOG00000030644	Mt-nd1	3241.82	3414.66	3230.59	2858.88	2904.76	2831.97	3018.09	2972.5	3088.44
ENSRNOG00000017645	Mylpf	1523.71	1602	1611.22	2655.11	2463.96	2584.09	4613.15	4546.17	4603.48
ENSRNOG00000020843	LOC100360087	4065.23	3877.04	3985.52	1998.3	1832.82	1963.54	2402.7	2337.08	2309.96
ENSRNOG00000016837	Ckm	1179.27	1155.11	1237.53	1989.36	1902.06	2020.16	4968.01	5256.63	5019.32
ENSRNOG00000015155	Tnnc2	1249.09	1324.53	1398.09	2432.29	2335.18	2354.93	4603.76	4380.56	4527.94
ENSRNOG00000047124	Atp2a1	1192.14	1135.17	1264.79	2074.69	1922.56	1984.8	4319.99	4402.32	4294.24
ENSRNOG00000009439	Eef1a1	2303.43	2282.55	2298.64	2535.27	2572.28	2609.94	2245.13	2343.7	2343.21
ENSRNOG00000013262	Myl1	1273.76	1336.51	1356	2294.98	2221.42	2288.74	3454.35	3391.8	3427.45
ENSRNOG00000020332	Tnnt3	1018.06	1060.63	1179.5	2049.7	2119.97	2230.68	3797.16	3861.51	3473.61
ENSRNOG00000042233	Rpl41	1682.61	1808.41	1674.63	3004.9	2839.26	2805.52	2237.22	2267.71	2307.18
ENSRNOG00000005825	Lyz2	3109.54	3197.58	3075.42	1394.42	1335.06	1337.83	1954.34	1853.15	1882.55
ENSRNOG00000031033	Mt-nd2	2187.54	2324.34	2172.31	1826.48	1937.91	1868.12	1950.35	2101.88	2199.35
ENSRNOG00000029886	Hba-a2	1937.36	1654.89	1560.3	1922.2	1981.49	1971.28	2477.55	2270.41	2499.2
ENSRNOG00000014272	Rpl35	1572.45	1776.7	1657.5	2278.44	2260.3	2271.07	2239.56	2022.86	2047.06
ENSRNOG00000001049	Tpt1	1337.08	1427.57	1355.99	2218.25	2236.61	2175.2	2275.14	2210.55	2299.39
ENSRNOG00000042499	LOC100364435	2255.94	2312.61	2202.9	2112.08	2129.51	2203.71	1337.46	1262.37	1283.32
ENSRNOG00000006471	Pvalb	1420.33	1478.58	1522.94	1159.5	1167.25	1138.07	2933.21	2694.6	2689.6
ENSRNOG00000019459	Oaz1	1767.06	1690.55	1655.75	1821.87	1642.09	1744.94	2083.25	1940.71	1823.89
ENSRNOG00000001148	Rplp0	1594.15	1599.63	1602.09	2021.71	1858.34	1923.54	1796.32	1832.14	1756.83
ENSRNOG00000024603	Rps15	1450.27	1503.39	1478.66	2042.01	1850.65	1970.05	1862.93	1770.53	1787.72
ENSRNOG00000013874	Rplp1	1444.26	1501.04	1478.4	2108.32	1743.72	1925.14	1687.27	1717.65	1910.83
ENSRNOG00000008555	Rps20	1421.27	1521.83	1502.97	2132.32	1912.12	2000.41	1695.88	1635.96	1670.14
ENSRNOG00000052802	Aldoa	876.818	894.902	902.311	1274.2	1258.94	1264.66	2945.32	2969.73	2968.65
ENSRNOG00000033615	Mt-nd3	1501.25	1774.3	1593.48	1798.99	1901.27	1772.86	1506.11	1677.62	1789.29
ENSRNOG00000018087	Vim	1807.4	1794.28	1761.99	1715.71	1738.91	1718.22	1507.48	1490.24	1456.31
ENSRNOG00000018774	Rps14	1296.06	1364.79	1267.39	1994.93	1787.33	1839.74	1727.96	1641.9	1675.2
ENSRNOG00000016580	Rps23	1138.02	1246.62	1162.36	1754.38	1635.73	1608.26	1451.81	1442.04	1487.68
ENSRNOG00000009884	Lgals1	1623.29	1620.68	1594.89	1571.57	1439.66	1519.53	1176.18	1139.3	1106.35
ENSRNOG00000018645	Rpsa	1196.19	1179.75	1183.6	1626.41	1516.22	1555.74	1373.09	1368.25	1338.8
ENSRNOG00000054626	Rps8	1234.61	1268.6	1203.92	1519.63	1458.28	1434.21	1424.23	1375.26	1359.28
ENSRNOG00000015335	Rpl13	1218.08	1228.61	1242.47	1524.31	1329.69	1413.45	1354.28	1318.43	1305.32
ENSRNOG00000033473	Rpl36	1089.38	1115.89	965.669	1748.88	1403.42	1546.57	1380.14	1242.8	1400.9
ENSRNOG00000004196	Rps29	873.212	1004.69	872.14	1745.69	1703.5	1590.66	1393.9	1215.45	1394.95
ENSRNOG00000034254	Actb	1689.83	1606.14	1681.14	1182.63	1161.35	1151.04	1022.42	1082.19	1032.73
ENSRNOG00000016731	Tpm2	653.095	673.233	693.098	1111.74	1069.05	1115.53	1905.87	1908.83	1912.82
ENSRNOG00000017418	Rps3	1113.75	1135.39	1117.01	1349.33	1268.63	1272.62	1257.32	1226.77	1234.06
ENSRNOG00000016387	Rpl34	1050.34	1131.87	1064.8	1322.03	1324.1	1360.48	1243.77	1205.88	1245.43
ENSRNOG00000019974	Uba52	1057.51	1104.14	1079.98	1283.62	1266.54	1339.04	1291.11	1266	1243.56
ENSRNOG00000010105	S100a11	1381.28	1457.98	1384.31	1228.78	1161.4	1195.77	1072.25	941.795	958.478
ENSRNOG00000010079	Car3	744.414	763.109	769.596	1210.42	1229.91	1257.97	1586.68	1595.5	1595.2
ENSRNOG00000018630	Gapdh	851.983	885.125	890.546	1012.68	984.223	980.972	1656	1654.65	1648.86
ENSRNOG00000005195	Cst3	1039.47	1055.29	1026.63	1201.67	1155.64	1194.85	1299.35	1247.45	1268.16
ENSRNOG00000020266	Eef2	1117.78	1065.2	1115.49	1200.99	1152.51	1196.75	1188.7	1198.04	1170.06
ENSRNOG00000018795	Rpl18a	948.036	982.811	945.012	1339.3	1230.01	1274.36	1272.25	1215.14	1196.42
novel.1014	-	959.59	1013.61	947.338	1272.78	1271.6	1306.39	1159.19	1156.12	1221.7
ENSRNOG00000047321	Hba-a2	933.036	894.595	859.283	1124.25	1180.59	1183.74	1447.75	1282.35	1388.39
ENSRNOG00000017123	B2m	1037.67	1108.9	1022.64	1240.75	1286.16	1237.65	1045.74	1010.27	1014.79
ENSRNOG00000001611	Rpl24	891.556	940.188	882.545	1247.25	1205.86	1278.96	1162.21	1173.93	1180.81
ENSRNOG00000021035	Rpl18	1031.57	1039.37	1044.34	1169.67	1141.64	1136.29	1153.05	1044.02	1075.93
ENSRNOG00000002050	Igfbp7	1069.18	1032.2	1062.63	1118.35	1067.86	1083.02	1176.4	1080.3	992.284
ENSRNOG00000020674	Rpl27	931.204	1003.51	941.39	1139.18	1090.96	1137.47	1160.22	1099.84	1157.4
ENSRNOG00000003975	Pfn1	1334.42	1282.66	1331.12	1001.01	962.546	997.39	927.253	882.111	882.758
ENSRNOG00000019106	Rps17	833.983	900.177	867.316	1169.43	1149.48	1127.96	1096.29	1084.83	1111.09
ENSRNOG00000010805	Fabp4	922.771	997.258	917.81	873.319	887.534	898.349	1271.17	1221.52	1239.17
ENSRNOG00000030371	Mt-co2	948.579	1050.07	981.97	1117.03	1011.2	1077.37	861.424	1046.07	1100.5
ENSRNOG00000008816	Gpnmb	1900.4	1847.76	1838.31	393.13	394.735	408.535	748.046	746.099	745.742
ENSRNOG00000014179	Rps2	1118.29	921.999	931.849	1038.85	1137.69	918.561	883.975	1037.94	1009.58
ENSRNOG00000000571	Psap	1287.41	1273.32	1250.98	765.668	746.728	740.356	935.508	894.66	878.261
ENSRNOG00000056765	Rpl10	923.473	940.038	915.612	1003.47	938.275	988.375	954.283	958.26	954.82
ENSRNOG00000011893	Rps3a	800.942	854.893	806.583	988.028	1075.25	1055.73	974.049	958.944	995.9
ENSRNOG00000004426	Rps27a	881.502	802.428	796.899	1025.6	870.255	1125.87	901.259	1002.93	1086.57
ENSRNOG00000011138	Rpl29	852.623	866.205	885.438	1110.24	926.611	980.386	863.834	969.518	1017.52
ENSRNOG00000020982	LOC687780	837.645	761.973	738.931	1102.09	1081.74	1095.13	968.269	917.225	949.218
ENSRNOG00000016961	Rps27	714.005	787.313	703.704	1130.37	1108.85	1076.45	979.945	900.735	928.1
ENSRNOG00000019007	Rpl14	804.715	840.524	827.586	1015.46	972.277	993.232	920.86	895.506	927.969
ENSRNOG00000031053	Mt-nd4l	965.139	1109.9	998.228	738.408	863.314	809.813	792.17	866.528	943.3
ENSRNOG00000010746	Rpl32	691.495	758.706	690.475	1032.8	1003.27	1013.02	902.678	906.55	908.265
ENSRNOG00000060449	Rps21	683.996	685.565	634.49	1157.54	963.369	950.203	986.967	866.495	976.636
ENSRNOG00000004107	Rpl23	655.807	732.976	683.035	951.077	976.754	925.135	881.805	877.196	900.333
ENSRNOG00000025936	Rpl6	798.83	782.726	774.878	905.588	895.765	896.838	840.77	822.531	847.111
ENSRNOG00000004078	Eno3	385.964	384.644	405.277	675.858	660.455	685.48	1423.04	1434.93	1414.81
ENSRNOG00000060098	Ptms	872.95	888.159	892.749	720.012	767.579	740.813	862.975	834.834	800.47
ENSRNOG00000010331	Ctsb	1112.89	1120.19	1104.74	670.28	674.33	667.766	605.965	609.65	615.906
ENSRNOG00000019745	Actn3	282.356	279.892	290.189	543.697	527.289	526.356	1542.22	1586.17	1560.51
ENSRNOG00000013532	Pgam2	382.106	367.032	388.938	571.409	535.297	558.218	1507.48	1407.12	1381.08
ENSRNOG00000019578	Rps16	638.825	655.527	634.303	872.579	856.148	788.516	857.293	799.031	815.428
ENSRNOG00000013508	Rpl31	624.647	687.67	640.689	807.189	845.745	841.561	848.005	764.009	810.51
ENSRNOG00000042271	Ubb	779.352	821.401	836.53	688.063	715.475	772.849	738.379	731.05	653.394
ENSRNOG00000023226	S100a10	678.106	786.344	723.776	843.406	857.2	782.77	722.166	651.695	680.236
ENSRNOG00000012660	Postn	697.273	724.518	710.043	981.403	1011.17	986.09	485.444	491.186	506.856
ENSRNOG00000018584	LOC100359583	823.42	907.078	813.383	619.811	635.096	588.827	768.886	695.255	685.739
ENSRNOG00000000490	Rps10	599.779	660.258	626.847	795.438	759.479	810.006	753.581	736.044	723.524
ENSRNOG00000004741	Rpl19	624.125	634.815	625.836	743.27	731.15	789.574	731.516	739.721	772.201
ENSRNOG00000008301	Tagln2	922.235	889.319	900.89	610.435	604.496	612.467	617.753	588.315	574.297
ENSRNOG00000023529	Rpl5	601.832	625.212	606.789	743.061	769.547	748.039	740.992	730.374	749.742
ENSRNOG00000007650	Cd63	945.275	921.588	940.174	633.036	592.928	602.975	554.332	538.472	529.683
ENSRNOG00000011329	Pkm	638.362	617.719	661.592	541.794	516.36	527.277	870.225	853.118	833.502
ENSRNOG00000018735	Cd74	648.972	652.459	648.013	759.902	723.754	726.737	656.629	614.302	615.144
ENSRNOG00000016220	Rpl12	598.945	593.185	621.911	767.133	698.548	752.418	669.054	654.385	624.657
ENSRNOG00000001254	Col6a2	710.404	685.466	716.936	808.715	779.971	800.54	514.08	480.541	474.68
ENSRNOG00000010189	Rps24	531.902	561.958	534.247	746.061	776.408	765.424	676.929	663.55	692.698
ENSRNOG00000016411	Rps12	550.559	546.864	536.178	809.325	721.894	771.319	635.811	673.978	636.371
ENSRNOG00000020276	Tnni2	281.217	298.599	312.648	578.423	570.389	593.778	1091.36	1093.39	1039.66
ENSRNOG00000046316	Tomm6	655.514	650.065	649.787	663.314	619.663	581.806	701.809	647.051	684.161
ENSRNOG00000009047	Sln	57.9063	58.5111	56.4089	959.468	885.825	960.499	960.819	942.045	960.039
ENSRNOG00000020380	Lgals7	598.085	653.636	649.511	614.094	573.19	598.038	757.051	712.055	683.317
ENSRNOG00000026605	Ifi27l2b	310.715	321.569	307.524	1136.23	1008.98	1103.5	534.438	527.332	542.075
ENSRNOG00000008551	Rps7	528.754	536.9	530.721	702	699.846	693.335	675.009	653.177	672.823
ENSRNOG00000009378	Rpl4	565.868	580.612	576.745	667.568	675.464	668.477	629.764	651.89	675.489
ENSRNOG00000018184	Tpm1	484.806	496.772	502.39	618.434	589.768	609.151	784.69	777.592	768.942
ENSRNOG00000027990	Crip1	758.764	796.572	771.014	605.055	549.117	601.996	516.399	494.401	533.867
ENSRNOG00000018680	Rpl17	465.756	534.874	486.922	744.919	732.317	719.605	609.903	632.555	665.411
ENSRNOG00000003220	H3f3a	642.142	636.648	641.787	582.631	561.351	577.736	634.191	629.885	635.241
ENSRNOG00000021090	Pygm	267.431	270.998	281.295	464.39	442.42	442.986	1117.99	1098.47	1111.67
ENSRNOG00000029971	Mt-nd5	666.758	677.102	645.7	569.117	599.132	583.098	528.482	606.984	617.48
ENSRNOG00000015277	Serf2	592.555	577.74	566.636	664.676	660.084	669.645	590.927	544.055	604.253
ENSRNOG00000027503	Rps25	485.688	526.073	482.625	677.881	658.506	677.45	618.156	641.882	659.275
ENSRNOG00000049075	Fabp5	827.701	888.077	844.644	333.993	348.356	327.399	620.359	589.102	595.619
ENSRNOG00000010645	Lgals3	997.745	1008.79	967.307	356.411	307.96	329.404	457.304	450.774	478.677
ENSRNOG00000016478	Eif5a	705.464	670.657	694.841	519.424	507.163	529.459	563.061	548.331	535.061
ENSRNOG00000011647	S100a6	585.365	632.745	605.337	629.475	577.604	592.981	538.539	539.032	551.737
ENSRNOG00000020075	Eef1g	541.944	542.108	545.24	639.712	603.318	622.062	573.934	563.172	578.343
ENSRNOG00000019810	Des	268.938	261.966	280.108	667.689	626.843	663.135	783.368	833.893	805.538
ENSRNOG00000002840	Atp5b	567.508	562.784	565.364	537.069	521.027	530.335	620.287	625.001	627.669
ENSRNOG00000052564	Gpx3	472.544	463.507	467.538	730.304	656.614	697.078	552.117	551.779	553.333
ENSRNOG00000027271	RGD1359290	512.884	499.238	483.338	638.922	636.915	626.612	602.249	562.974	564.707
ENSRNOG00000019453	Rps5	490.38	522.765	500.708	662.302	601.41	600.541	580.31	569.672	575.758
ENSRNOG00000011292	NEWGENE_621351	405.051	600.608	861.145	765.188	583.896	684.565	320.585	342.148	483.698
novel.99	-	220.147	218.643	235.56	449.43	423.364	434.212	982.946	1026.57	1008.21
ENSRNOG00000004554	Dcn	417.107	442.146	426.416	758.125	807.401	763.099	450.401	454.334	474.5
ENSRNOG00000050735	Cd99	658.905	624.29	641.892	585.681	533.705	549.43	492.485	461.781	432.708
ENSRNOG00000004583	Mb	355.185	349.702	360.97	804.242	789.282	822.228	508.711	482.218	490.929
ENSRNOG00000027864	Ppia	618.656	637.611	629.515	507.084	492.087	516.547	510.005	498.708	530.994
ENSRNOG00000020595	Rps11	466.123	482.651	470.354	628.676	593.155	578.808	559.138	555.244	558.572
ENSRNOG00000018991	Gsn	215.78	210.721	214.618	609.188	601.027	606.968	842.888	804.063	778.343
ENSRNOG00000032825	Rpl30	436.469	447.484	427.794	578.343	608.983	585.234	603.126	570.752	621.619
ENSRNOG00000013009	Ldha	457.734	470.036	468.538	462.647	440.737	458.165	703.914	696.108	700.786
ENSRNOG00000014214	Rpl27a	460.503	481.505	466.835	643.316	582.421	586.936	526.595	542.023	560.093
ENSRNOG00000020660	Cfl1	714.993	701.759	688.203	477.428	469.317	470.999	449.6	425.756	430.466
ENSRNOG00000052219	Gm2a	914.668	924.001	901.559	267.338	264.432	269.596	429.035	425.866	428.304
ENSRNOG00000005975	LOC100362027	346.544	430.457	406.201	640.1	714.881	671.088	536.303	512.436	544.477
ENSRNOG00000004214	Rpl26	419.025	434.255	421.388	589.996	599.265	598.198	565.947	564.175	571.304
ENSRNOG00000019568	Jund	716.406	635.656	704.031	468.518	435.815	460.624	463.524	450.731	396.663
ENSRNOG00000033564	Cfd	159.573	159.653	153.122	628.706	589.611	581.389	863.748	822.511	771.377
ENSRNOG00000006542	Atp6v0c	815.408	804.474	824.632	336.929	336.711	342.53	444.34	417.568	401.389
ENSRNOG00000029042	Mt-nd6	471.63	514.949	458.952	536.295	568.021	520.85	462.944	530.028	561.842
ENSRNOG00000023786	Ybx1	480.673	522.442	520.799	499.618	490.229	477.325	523.981	574.566	526.396
ENSRNOG00000030478	AY172581.9	520.734	563.423	484.282	586.063	613.874	577.254	403.061	415.484	439.258
ENSRNOG00000036701	LOC100361457	689.042	668.964	666.311	440.61	408.302	418.714	419.549	414.222	412.097
ENSRNOG00000028993	LOC102555453	489.556	464.627	473.247	478.29	459.917	506.52	576.481	548.751	539.892
ENSRNOG00000004610	Lum	629.908	670.276	657.292	561.427	592.034	562.085	288.362	284.159	289.849
ENSRNOG00000016831	Serpinh1	548.005	566.154	561.531	614.041	595.241	608.48	342.844	325.03	336.204
ENSRNOG00000023385	Rpl37a	356.221	394.891	367.429	562.717	610.632	605.949	533.336	485.992	544.938
ENSRNOG00000040122	Myoz1	160.606	159.738	170.195	410.29	402.322	408.917	915.553	895.626	906.381
ENSRNOG00000009263	Ifi27	402.617	417.438	404.727	641.36	572.88	596.171	475.483	457.902	453.238
ENSRNOG00000005480	Ybx3	293.383	286.47	305.479	504.284	505.466	527.104	672.014	671.499	634.09
ENSRNOG00000049695	Myh2	190.008	188.94	197.536	396.445	401.18	401.208	839.357	899.686	883.071
ENSRNOG00000001249	Col6a1	514.452	488.415	505.685	576.556	568.987	569.196	384.474	363.889	367.134
ENSRNOG00000048812	Gpx1	681.605	682.113	680.316	388.512	347.973	363.585	408.861	383.516	395.656
ENSRNOG00000017817	Cox4i1	431.858	457.794	431.683	487.779	478.751	491.255	503.392	488.673	504.516
ENSRNOG00000039876	LOC681410	598.819	596.24	489.691	427.643	440.085	377.608	420.064	458.295	408.576
ENSRNOG00000003201	Rps4x	385.759	414.671	407.962	500.246	511.174	502.404	490.614	473.552	480.687
ENSRNOG00000016695	Mmp2	528.614	513.22	534.313	534.289	527.527	540.035	335.886	318.576	324.01
ENSRNOG00000016469	Fxyd2	708.97	703.68	682.151	319.454	289.278	316.273	395.505	360.803	352.216
ENSRNOG00000020296	LOC103693430	339.566	419.667	354.704	447.068	535.629	453.842	514.767	506.781	533.775
ENSRNOG00000010362	Anxa2	499.122	509.181	499.889	430.886	433.327	433.313	430.428	401.596	413.244
ENSRNOG00000011104	Rpl22	356.882	401.173	381.596	508.079	509.12	495.343	473.127	459.149	466.447
ENSRNOG00000002671	Nme2	479.127	492.492	481.966	479.962	473.837	480.314	391.293	365.795	383.882
ENSRNOG00000010830	Slc25a4	291.059	299.372	301.025	468.081	460.035	463.881	589	585.074	570.718
ENSRNOG00000017628	Tagln	499.025	481.022	492.856	423.703	406.653	418.365	411.451	397.991	382.61
ENSRNOG00000050420	Krt5	488.842	465.913	488.289	395.541	394.765	389.182	436.258	419.806	407.879
ENSRNOG00000001170	Cox6a1	487.727	536.059	504.023	395.313	388.723	395.066	423.094	376.544	371.928
ENSRNOG00000019834	Hsp90ab1	419.139	415.665	408.738	416.581	423.635	426.524	457.135	450.227	460.349
ENSRNOG00000000488	Hmga1	529.379	441.071	524.056	304.634	296.618	311.057	505.499	491.504	449.188
ENSRNOG00000012081	Txn1	503.367	587.381	530.109	355.263	383.04	353.164	355.642	359.134	400.861
ENSRNOG00000016727	Akr1a1	487.002	460.25	469.472	406.686	400.805	406.594	380.554	378.125	377.121
ENSRNOG00000015320	Atp5g2	386.275	367.095	369.577	425.688	407.08	433.49	470.96	442.27	439.908
ENSRNOG00000042886	Rps28	308.298	356.045	329.101	521.451	523.913	485.772	430.798	379.502	404.677
ENSRNOG00000016912	Btf3	386.975	414.393	398.544	430.152	427.903	422.358	384.787	419.282	417.078
ENSRNOG00000003899	Krt14	415.859	413.891	410.077	437.448	402.486	412.21	419.947	387.162	386.873
ENSRNOG00000021155	Ctsk	740.847	759.793	742.765	258.817	262.658	258.459	228.384	220.182	211.526
ENSRNOG00000020206	Ctsd	559.165	545.86	552.715	303.06	284.133	286.512	396.022	366.958	364.108
ENSRNOG00000015278	Myl12a	367.973	382.589	363.873	446.893	436.712	450.408	397.646	383.505	385.905
ENSRNOG00000011494	Rpl36a	280.033	308.796	291.747	501.194	487.63	470.978	436.242	402.749	431.471
ENSRNOG00000010947	Mmp14	541.994	523.704	550.37	410.932	425.091	427.799	255.928	235.277	227.235
ENSRNOG00000005695	Mgp	310.656	334.878	312.302	464.543	433.219	456.563	407.653	393.568	408.12
ENSRNOG00000049912	Atp5e	297.282	318.723	300.607	427.83	390.691	415.321	451.163	442.724	458.202
ENSRNOG00000028505	Rps18	326.972	346.176	329.765	443.103	415.891	423.575	404.091	392.865	383.451
ENSRNOG00000011821	S100a4	381.828	408.646	386.286	436.397	401.601	395.758	350.942	341.038	358.91
ENSRNOG00000000957	Rpl21	201.419	226.357	427.566	716.382	418.998	639.984	393.337	98.5258	328.533
ENSRNOG00000021201	Txnip	180.803	179.134	173.268	390.187	391.857	393.5	566.634	567.537	571.135
ENSRNOG00000016271	Itm2b	332.154	338.603	326.738	411.965	420.671	412.581	379.216	379.169	392.275
ENSRNOG00000017127	Rpl28	311.253	336.471	315.594	442.551	391.47	403.356	402.353	379.448	385.169
ENSRNOG00000050630	AABR07070043.1	268.767	253.67	261.553	320.056	291.314	297.514	563.706	538.83	508.804
ENSRNOG00000036688	Arhgdia	464.411	442.08	450.498	334.753	317.388	334.381	328.723	318.676	309.729
ENSRNOG00000006532	H3f3b	415.924	409.569	408.212	342.769	348.708	336.731	335.114	337.203	342.748
ENSRNOG00000057347	Cebpb	431.892	439.562	489.743	247.632	266.073	235.775	428.68	417.274	287.605
ENSRNOG00000000991	Arpc1b	417.335	408.42	400.968	360.972	343.58	345.364	338.87	316.176	312.448
ENSRNOG00000004060	Calm3	424.857	461.698	432.012	328.213	333.041	332.447	282.09	292.032	297.749
ENSRNOG00000026716	Rpl9	296.389	290.466	293.912	368.1	402.586	389.454	368.655	382.463	386.172
ENSRNOG00000017708	AABR07073038.1	375.888	367.338	370.81	318.569	309.859	324.911	366.387	338.81	336.389
ENSRNOG00000062272	Rn60_17_0157.2	297.749	316.916	283.757	409.312	380.199	354.219	346.303	314.995	370.486
ENSRNOG00000007806	Arf5	374.193	342.404	358.307	362.126	321.475	346.942	335.298	311.574	311.697
ENSRNOG00000043866	AY172581.24	403.304	429.968	376.755	346.613	391.624	356.552	227.128	239.781	262.756
ENSRNOG00000012477	Eef1a2	176.83	165.442	183.656	341.324	333.503	327.999	498.531	499.607	480.472
ENSRNOG00000017417	Gabarap	369.711	374.865	359.672	341.513	352.785	334.066	300.372	278.133	294.587
ENSRNOG00000061216	Tubb5	375.3	359.34	379.953	332.686	319.176	335.33	304.598	298.251	291.032
ENSRNOG00000033153	Sfn	491.3	463.523	485.861	221.164	214.447	238.067	298.995	291.171	273.662
ENSRNOG00000008937	Csrp1	325.997	320.052	323.53	339.132	343.957	355.252	321.466	319.1	320.665
ENSRNOG00000015496	Tpm4	436.614	453.148	433.548	298.742	308.079	305.074	235.093	239.553	246.79
ENSRNOG00000015078	Ifitm3	249.957	260.366	253.913	469.376	417.67	435.549	295.74	269.109	282.682
ENSRNOG00000010872	Ckb	556.481	539.968	531.318	180.934	174.963	173.746	263.922	249.624	244.336
ENSRNOG00000010029	Ubald2	346.366	352.959	355.941	275.425	274.809	261.988	388.888	342.72	313.361
ENSRNOG00000014288	Fn1	414.524	407.089	413.93	313.028	310.642	317.023	241.089	244.7	243.021
ENSRNOG00000003148	Timp2	375.453	393.868	388.918	355.58	363.338	340.828	224.83	238.378	215.665
ENSRNOG00000008140	Rpl15	287.424	292.574	286.53	355.844	336.412	344.608	332.028	332.015	328.301
ENSRNOG00000033517	LOC100360791	384.054	393.844	381.667	335.389	334.081	348.15	235.32	227.652	244.76
ENSRNOG00000017032	Atp5a1	320.385	322.825	322.921	276.118	278.088	291.196	360.27	349.275	359.851
ENSRNOG00000016952	Uqcr11	286.618	292.097	295.238	317.177	290.107	312.411	378.837	351.595	353.279
ENSRNOG00000012062	Npc2	380.023	383.267	383.227	300.444	301.931	291.047	277.309	277.444	276.366
ENSRNOG00000010306	H2afz	344.918	368.779	348.818	289.631	273.933	264.657	322.334	332.824	323.889
ENSRNOG00000020845	Tyrobp	447.722	473.107	474.713	263.249	237.855	247.942	258.849	235.445	227.977
ENSRNOG00000023546	Hspb1	282.841	271.613	284.543	331.556	325.724	347.755	361.092	333.695	325.636
ENSRNOG00000037897	NEWGENE_68440	212.527	344.384	315.296	245.157	353.536	261.035	403.413	378.23	333.519
ENSRNOG00000014405	Aprt	332.542	319.7	338.122	330.723	306.068	318.455	316.553	283.917	291.969
ENSRNOG00000021151	Ppp1r14b	318	326.559	339.843	324.841	325.019	321.857	312.466	284.681	284.189
ENSRNOG00000061425	Cox14	291.156	339.22	302.632	327.06	311.129	291.883	344.368	303.666	307.078
ENSRNOG00000055962	Bgn	310.528	305.337	310.968	379.172	362.57	368.307	259.196	257.402	264.393
ENSRNOG00000049560	Glul	183.167	183.025	187.185	282.685	287.888	285.723	466.463	464.963	462.266
ENSRNOG00000021125	Prdx5	490.295	491.175	481.822	182.769	183.986	175.709	275.368	256.311	259.012
ENSRNOG00000019627	Mybpc2	158.058	162.049	169.645	210.291	205.581	200.227	560.504	569.029	558.067
ENSRNOG00000050519	Rhoa	353.952	377.202	362.072	295.888	308.344	296.54	260.904	262.403	270.516
ENSRNOG00000054140	Myl6	340.218	331.448	341.91	314.404	316.994	318.515	275.405	260.255	271.36
ENSRNOG00000020533	Htra1	388.296	385.04	390.869	331.454	325.862	326.937	210.208	204.222	206.636
ENSRNOG00000027049	Atp5j2	250.212	274.85	266.843	336.069	313.523	311.416	327.936	320.651	331.489
ENSRNOG00000028884	Atp5l	263.063	282.183	278.778	313.885	296.716	321.635	333.382	315.035	327.691
ENSRNOG00000003029	Calr	384.768	395.668	385.443	282.076	288.768	285.44	241.155	230.01	238.382
ENSRNOG00000008461	Smdt1	277.552	282.896	273.466	288.592	262.9	274.03	375.317	344.454	351.794
ENSRNOG00000060229	Arf1	350.123	345.492	342.614	290.786	272.944	283.804	287.504	266.52	273.5
ENSRNOG00000058039	Acta2	359.105	372.792	374.383	281.236	276.516	283.202	261.249	245.039	245.314
ENSRNOG00000017414	Irf7	149.674	141.728	138.308	526.444	491.702	527.255	245.223	235.617	230.962
ENSRNOG00000002947	Dpt	267.567	274.962	272.913	340.19	362.428	346.472	267.778	262.349	270.795
ENSRNOG00000018320	Rps15a	203.865	221.124	206.508	362.295	363.984	357.372	288.048	295.954	326.228
ENSRNOG00000013720	Aebp1	319.479	311.351	324.88	360.368	345.389	353.305	208.018	200.674	194.397
ENSRNOG00000031022	Rpl36al	256.903	292.142	234.356	324.353	291.694	330.814	287.053	296.109	286.448
ENSRNOG00000023150	Gpi	226.649	220.738	226.823	245.723	235.905	243.33	403.603	397.79	394.723
ENSRNOG00000055579	Tmbim6	250.437	246.909	254.864	272.017	264.882	271.052	345.904	346.747	336.114
ENSRNOG00000030237	Cox7c	245.77	276.139	257.956	253.436	328.259	286.097	314.919	309.407	307.841
ENSRNOG00000010635	Igfbp4	305.716	280.726	295.135	295.87	297.13	293.412	281.28	270.45	258.547
ENSRNOG00000034246	Rps27a	177.191	304.908	221.062	361.818	482.077	256.68	333.5	252.008	182.061
ENSRNOG00000010807	Cox6c	232.562	272.048	242.866	294.781	298.781	293.027	313.264	298.256	322.847
ENSRNOG00000011175	Hnrnpa2b1	307.977	321.413	308.81	239.388	269.599	244.097	281.039	290.045	295.855
ENSRNOG00000000875	Fhl1	107.726	109.788	114.034	430.139	411.781	436.63	301.241	315.101	313.044
ENSRNOG00000011222	Dynll1	346.759	352.354	348.54	258.026	254.983	255.733	244.531	230.132	230.494
ENSRNOG00000029410	Rpl21	209.777	219.893	257.964	355.226	308.37	317.421	338.606	246.256	267.916
ENSRNOG00000008414	Bsg	283.65	282.772	285.563	286.552	272.46	282.294	281.009	264.195	249.361
ENSRNOG00000019638	Lmna	302.138	290.169	295.591	277.581	261.087	273.109	273.669	263.173	250.141
ENSRNOG00000020684	Vat1	382.149	358.199	369.81	235.202	229.068	234.024	233.361	224.484	215.527
ENSRNOG00000012807	C1qa	244.438	233.827	249.844	360.478	358.966	358.948	233.467	218.693	211.318
ENSRNOG00000043451	Spp1	442.231	444.299	432.897	137.288	130.168	134.018	247.008	243.046	242.824
ENSRNOG00000017895	Eno1	383.816	378.889	381.911	226.9	218.76	220.422	220.473	211.265	207.226
ENSRNOG00000059660	AABR07065531.5	232.769	217.236	233.825	365.345	321.433	351.449	263.598	233.162	219.845
ENSRNOG00000043098	Mt2A	297.46	334.163	312.599	195.07	182.351	184.14	326.174	289.051	317.51
ENSRNOG00000030187	Mmp12	546.73	564.053	540.861	76.3256	81.7882	77.1769	171.871	180.8	175.23
ENSRNOG00000015850	Rbp7	116.987	120.578	122.966	225.012	234.103	232.071	452.127	448.072	456.629
ENSRNOG00000005116	LOC108350502	217.688	303.4	318.424	292.615	178.937	356.473	315.708	204.619	217.159
ENSRNOG00000013014	Cyba	405.117	390.869	399.343	202.41	183.373	204.514	212.186	205.663	196.916
ENSRNOG00000055023	AABR07006258.2	249.385	262.781	247.371	292.643	284.22	302.475	277.477	233.81	249.042
ENSRNOG00000026371	Krt17	372.354	328.922	356.558	175.997	168.968	164.885	285.576	281.628	258.269
ENSRNOG00000003171	Mpz	90.2	88.3596	86.0754	153.164	150.757	155.484	573.018	549.91	542.141
ENSRNOG00000061231	Selenom	263.749	265.733	271.785	337	303.021	316.153	210.699	200.463	196.489
novel.130	-	287.732	293.734	283.365	269.338	270.249	255.807	238.52	221.127	241.336
ENSRNOG00000014453	Anxa5	339.808	347.559	344.724	221.6	221.622	226.705	219.98	211.388	217.242
ENSRNOG00000006930	Casq1	254.501	258.147	267.831	235.531	225.509	233.807	293.121	289.815	292.333
ENSRNOG00000025001	Pcolce	320.87	301.201	324.568	298.917	292.367	301.781	169.585	158.942	159.976
ENSRNOG00000016781	Ppib	265.386	265.8	264.461	290.241	291.548	296.223	216.158	210.769	226.659
ENSRNOG00000008749	Col5a1	384.679	355.104	388.597	283.426	273.653	282.956	121.508	118.176	112.48
ENSRNOG00000017914	Prkcdbp	238.78	226.022	223.55	316.773	276.275	288.112	266.14	243.724	234.376
ENSRNOG00000012748	Vamp8	272.841	271.755	274.351	254.4	241.027	224.783	261.808	246.878	260.989
ENSRNOG00000014205	Klf2	264.785	228.485	274.283	243.186	225.906	249.58	294.672	276.053	226.568
ENSRNOG00000024186	Eef1b2	231.72	240.954	229.975	274.728	273.709	276.767	246.187	251.891	257.28
ENSRNOG00000030628	Eif4a1	310.539	312.47	304.591	228.358	234.601	222.263	219.946	217.255	223.965
ENSRNOG00000021403	Rhob	283.911	271.647	279.056	251.968	238.484	251.244	235.548	224.946	218.544
ENSRNOG00000036689	P4hb	300.575	300.804	299.613	253.763	256.158	259.848	186.833	190.83	199.4
ENSRNOG00000021177	Cox8a	271.256	291.914	275.589	231.648	239.273	239.581	231.064	229.794	237.359
ENSRNOG00000020246	Myl9	277.102	285.675	285	261.389	244.252	245.766	226.52	210.565	209.582
ENSRNOG00000016592	Gnai2	284.884	281.136	284.041	243.445	254.995	245.052	218.128	217.808	212.169
ENSRNOG00000057988	Pfkm	98.2035	93.948	100.632	232.578	234.132	236.642	413.814	404.703	409.851
ENSRNOG00000007457	Serping1	240.2	247.195	240.268	272.961	263.741	272.189	236.722	227.566	223.422
ENSRNOG00000003172	Serpinf1	262.572	248.944	255.517	328.774	311.008	316.171	173.769	161.621	164.459
ENSRNOG00000025388	Mrpl33	216.322	228.886	207.321	289.455	281.87	270.29	241.204	236.328	245.909
ENSRNOG00000001596	Atp5g3	243.427	262.401	249.423	229.023	222.959	230.904	274.225	249.518	255.499
ENSRNOG00000029145	AY172581.2	331.332	392.421	329.13	182.509	152.703	196.628	233.253	163.541	231.68
ENSRNOG00000046560	AC109096.1	245.83	232.657	231.702	258.4	251.546	252.977	252.969	247.245	230.826
ENSRNOG00000052620	Rack1	226.14	223.999	219.015	275.652	249.538	262.691	245.699	250.537	249.667
ENSRNOG00000007628	Ptp4a3	123.561	109.601	122.587	240.964	224.48	240.667	388.196	382.053	363.457
ENSRNOG00000003520	Prdx2	253.556	266.356	266.936	240.422	224.726	228.951	238.2	241.978	223.612
ENSRNOG00000010239	Cnbp	212.008	209.688	206.696	250.003	252.066	256.262	264.139	262.554	266.74
ENSRNOG00000028015	Pf4	394.185	404.194	401.562	143.266	148.301	141.927	183.625	168.82	182.498
ENSRNOG00000009982	Pnp	245.636	248.474	247.032	259.447	246.391	243.746	237.202	215.079	224.409
ENSRNOG00000050697	Ctsz	347.068	344.135	349.078	185.061	185.516	180.505	197.783	182.975	184.277
ENSRNOG00000019556	Cd9	335.986	335.636	324.94	166.147	162.38	168.545	221.461	208.512	225.332
novel.1128	-	238.79	265.411	238.397	299.834	319.891	306.311	154.767	160.379	160.709
ENSRNOG00000017854	Ucp2	270.434	260.517	268.3	181.686	185.535	177.636	285.282	259.03	250.875
ENSRNOG00000013118	Atox1	299.681	321.375	304.589	186.252	176.623	183.011	236.68	211.103	210.061
ENSRNOG00000030963	LOC108351137	165.534	163.3	168.261	219.683	184.381	197.193	340.677	346.594	337.591
ENSRNOG00000015857	Ctsa	291.39	281.898	285.701	219.731	216.974	223.149	202.108	197.453	195.464
ENSRNOG00000049077	Mir5125	205.243	207.291	195.613	287.339	228.652	251.533	246.135	230.805	258.887
ENSRNOG00000020602	LOC100911483	193.834	207.296	200.034	243.048	233.631	241.738	265.349	256.659	256.968
ENSRNOG00000018708	Ppp1ca	245.795	233.887	240.852	232.85	226.631	231.563	234.547	217.701	220.141
ENSRNOG00000042696	Minos1	232.488	248.573	232.049	227.271	225.111	221.755	241.96	221.331	229.934
ENSRNOG00000019778	Ptrf	230.327	223.977	219.129	247.665	244.467	237.358	216.841	227.881	224.134
ENSRNOG00000016281	Col4a1	250.967	236.208	247.29	261.621	251.061	257.151	189.612	185.586	178.876
ENSRNOG00000016896	Rpl3	232.498	233.223	233.706	236.85	231.986	236.387	213.668	218.799	220.71
novel.678	-	118.147	354.537	304.443	180.484	260.574	219.48	239.748	297.261	74.366
ENSRNOG00000010977	Igfbp6	172.753	164.431	165.859	284.385	247.848	261.08	261.303	247.242	240.681
ENSRNOG00000009068	Phlda3	183.362	174.691	182.165	233.056	213.061	228.739	297.359	269.361	248.367
ENSRNOG00000014936	Ifitm2	212.834	224.164	219.055	258.385	245.94	249.816	214.336	204.602	199.329
ENSRNOG00000006865	Laptm4a	203.804	196.638	205.988	259.433	259.78	251.229	216.372	207.348	223.524
ENSRNOG00000017359	Itm2c	235.52	239.428	236.77	256.322	243.948	244.161	192.902	188.336	185.833
ENSRNOG00000019851	Cox6a2	108.163	97.5986	105.25	252.79	231.814	257.457	328.107	314.817	325.575
ENSRNOG00000008680	Loxl1	221.138	198.485	215.957	278.742	276.569	282.238	198.93	184.976	163.34
ENSRNOG00000038074	LOC498555	200.232	218.243	191.731	253.509	234.694	248.896	234.843	215.888	221.816
ENSRNOG00000017469	Anxa1	269.443	278.504	270.906	213.347	225.617	219.276	176.734	176.733	184.311
ENSRNOG00000058914	Rbx1	197.343	222.295	208.44	227.231	229.726	215.759	242.706	224.422	241.907
ENSRNOG00000003147	Sqstm1	186.517	176.429	186.317	206.783	196.078	204.329	287.611	281.808	277.95
ENSRNOG00000017676	Plvap	275.296	247.953	266.596	204.22	193.263	197.439	221.048	202.401	192.34
ENSRNOG00000003217	Lgals3bp	204.891	187.707	200.143	308.4	307.689	317.309	166.347	152.53	153.627
ENSRNOG00000008639	Pabpc1	254.415	254.115	252.779	217.958	228.666	233.201	175.473	191.22	185.843
ENSRNOG00000001469	Eln	170.706	163.897	173.535	237.528	227.107	221.514	277.271	258.921	254.773
ENSRNOG00000000527	Mtch1	233.245	226.913	238.845	218.735	219.466	221.536	212.124	206.267	195.246
ENSRNOG00000023227	AABR07052585.2	98.2419	94.927	106.297	211.145	212.732	218.865	325.385	341.776	354.083
ENSRNOG00000013668	Capg	300.881	300.638	306.086	173.052	165.032	171.006	186.584	176.351	179.008
novel.154	-	156.452	191.542	154.128	251.606	284.021	274.305	220.198	213.45	210.785
ENSRNOG00000062158	Rn60_1_2212.4	24.7352	28.5632	23.4898	344.93	572.806	317.168	191.45	237.499	215.414
ENSRNOG00000005290	Ywhae	208.503	217.052	207.849	205.8	211.568	202.79	227.139	223.302	229.4
ENSRNOG00000008289	Slc25a3	210.629	208.781	211.297	215.195	205.798	209.608	216.67	219.085	223.338
ENSRNOG00000006604	Thy1	254.438	249.376	254.036	258.195	252.086	255.767	134.61	130.075	128.208
ENSRNOG00000052025	Aes	202.065	194.735	177.709	190.003	185.385	189.692	263.445	265.861	239.138
ENSRNOG00000052968	Hnrnpa3	241.048	257.535	241.452	184.698	196.025	189.653	198.961	197.132	199.051
ENSRNOG00000021079	Fxyd1	93.3388	110.077	117.791	232.049	224.65	227.359	311.14	300.258	287.921
ENSRNOG00000019987	Scand1	207.423	208.941	225.331	226.757	200.373	211.188	213.967	206.716	188.757
ENSRNOG00000015967	Sh3bgrl3	279.702	268.629	276.416	199.011	176	184.796	167.832	159.483	164.23
ENSRNOG00000006997	App	236.944	233.504	236.726	221.164	219.426	210.272	174.242	168.202	170.384
ENSRNOG00000006787	Dhcr24	139.299	134.867	136.87	186.349	188.148	177.019	305.338	304.483	297.251
novel.111	-	124.808	129.734	123.31	315.638	335.205	333.05	169.941	167.397	166.906
ENSRNOG00000057558	AC128792.2	270.335	347.012	279.504	166.825	144.547	159.187	149.889	170.036	177.731
ENSRNOG00000012804	C1qc	165.541	164.452	168.485	285.328	282.22	293.48	167.127	167.436	168.914
ENSRNOG00000008605	Ost4	198.383	211.047	195.611	224.675	223.509	226.156	194.568	183.951	192.428
ENSRNOG00000007091	Ly6e	152.605	153.856	150.064	288.032	277.562	287.461	186.6	176.072	173.324
ENSRNOG00000017194	Prdx1	249.921	262.196	246.195	157.082	178.672	165.68	193.284	189.481	193.173
ENSRNOG00000042903	Cox7a2	177.233	186.332	171.883	217.584	215.877	205.756	217.898	216.355	224.159
ENSRNOG00000058249	Pgk1	179.428	182.913	184.445	163.308	159.755	160.263	264.44	268.649	268.123
ENSRNOG00000016272	Edf1	197.728	189.274	186.56	207.966	198.407	210.701	220.23	204.211	208.168
ENSRNOG00000032803	Rpl21	184.656	186.395	168.328	197.309	204.224	209.01	217.591	240.985	213.451
ENSRNOG00000053086	Selenop	189.792	188.907	181.364	225.994	237.82	237.602	176.911	183.627	192.849
ENSRNOG00000005387	Rbm3	222.27	225.679	221.873	198.859	212.06	203.282	177.363	172.261	181.095
ENSRNOG00000054978	Hist1h1c	179.658	177.272	175.351	180.939	166.563	175.666	260.446	258.401	235.109
ENSRNOG00000013536	Cdc42	215.472	224.344	221.319	186.44	186.539	189.327	191.487	193.649	199.46
ENSRNOG00000001709	Ap2m1	227.73	222.253	222.958	201.047	194.798	198.197	180.659	175.041	177.96
ENSRNOG00000021808	Tecr	149.38	154.717	148.311	170.488	175.883	182.531	284.036	269.033	264.234
ENSRNOG00000015085	Dmpk	112.929	106.485	111.68	190.604	181.664	191.774	317.799	301.484	284.152
ENSRNOG00000024294	AABR07019083.1	344.985	300.794	342.155	116.027	110.365	116.101	154.11	160.166	152.695
ENSRNOG00000015018	Pdia3	230.732	238.82	238.508	210.822	215.639	202.882	155.03	148.404	155.123
ENSRNOG00000020093	LOC100360573	151.614	161.66	158.2	238.466	235.034	235.104	188.603	200.619	221.921
ENSRNOG00000033765	Eif1	169.69	183.255	178.452	197.092	195.912	203.247	218.475	219.946	223.998
ENSRNOG00000008170	Jph2	126.744	113.077	134.512	156.742	146.533	162.248	328.305	331.459	288.508
ENSRNOG00000034066	Hspa8	198.813	208.452	207.747	203.636	195.148	194.651	186.815	191.81	194.634
ENSRNOG00000000248	Srsf2	222.858	213.191	220.735	179.031	179.004	178.702	206.303	193.435	183.695
ENSRNOG00000025764	AC128848.1	216.496	223.1	232.473	145.546	135.05	139.108	221.645	228.723	232.49
ENSRNOG00000008676	Emp1	276.882	282.94	270.972	141.772	151.508	150.708	166.267	165.045	165.636
ENSRNOG00000013452	Rcn1	229.804	233.069	227.974	218.75	211.546	215.94	143.231	138.191	146.361
ENSRNOG00000016660	Cox5b	186.607	193.88	210.288	192.204	166.493	176.89	231.582	238.166	166.574
ENSRNOG00000020233	Rabac1	197.134	196.735	195.707	207.37	191.724	193.558	206.78	189.499	183.588
ENSRNOG00000008822	Fkbp1a	218.884	218.076	215.002	191.351	192.088	198.05	174.666	174.066	177.099
ENSRNOG00000001409	Gnb2	214.799	209.038	220.919	195.459	185.392	183.018	180.504	170.986	170.116
ENSRNOG00000005513	Srsf5	180.342	178.317	176.244	181.359	199.188	192.45	208.147	198.678	204.408
ENSRNOG00000056853	Psma7	186.877	189.114	186.733	197.479	197.09	191.218	197.198	186.557	182.553
ENSRNOG00000058412	Morf4l1	169.626	175.931	177.377	201.344	218.611	204.925	180.768	183.174	190.054
ENSRNOG00000004621	Rtn4	236.115	232.457	246.425	155.869	162.654	154.951	173.666	180.6	156.212
ENSRNOG00000018237	Gstp1	217.876	208.432	229.114	181.18	145.861	169.611	203.049	160.323	181.665
ENSRNOG00000024159	Fcer1g	209.593	225.637	219.262	181.3	187.788	184.761	174.374	153.696	160.406
novel.158	-	221.834	223.872	227.747	204.273	212.552	212.915	132.177	130.194	130.133
ENSRNOG00000012550	Uqcrh	167.733	174.565	168.356	200.512	209.013	186.468	193.741	187.206	199.526
ENSRNOG00000034180	Rpl37	130.797	158.046	137.791	219.637	248.124	220.228	200.614	187.41	183.11
ENSRNOG00000008195	Ywhaz	232.593	239.42	224.821	164.71	175.756	166.893	158.29	159.991	162.376
ENSRNOG00000003626	Atp5h	176.653	189.109	183.951	190.505	195.214	187.966	189.257	178.808	192.32
ENSRNOG00000004791	Arf6	233.786	240.042	257.126	157.955	159.559	151.543	164.353	172.896	146.247
ENSRNOG00000003150	Mpc2	139.731	150.948	139.401	172.232	185.204	166.116	240.335	251.529	237.51
ENSRNOG00000013023	Gltscr2	155.747	154.47	162.491	200.016	193.586	206.436	207.141	203.289	198.883
ENSRNOG00000043007	Rcn3	214.338	197.067	204.977	223.606	219.211	224.669	129.907	127.047	125.494
ENSRNOG00000010235	Pkig	144.51	137.367	144.178	232.386	211.687	233.147	190.33	189.084	178.377
ENSRNOG00000017510	Mfge8	212.135	202.363	208.907	206.23	197.538	207.593	145.338	139.867	136.869
ENSRNOG00000012658	Pdlim3	77.2602	76.5398	83.7326	229.209	225.736	227.388	248.178	247.503	241.144
ENSRNOG00000018371	Tubb6	203.942	193.372	197.564	211.42	203.11	211.757	144.632	144.528	139.079
ENSRNOG00000042838	Junb	249.622	236.749	246.347	159.497	140.286	147.876	169.547	147.57	147.308
ENSRNOG00000001201	Cstb	245.512	253.39	241.687	145.934	146.952	146.655	156.868	152.505	155.111
ENSRNOG00000020979	Psmb4	166.868	178.685	169.754	195.648	174.688	179.9	194.58	185.567	194.335
ENSRNOG00000055257	2019-09-15	197.893	203.757	200.406	190.996	186.14	186.054	158.752	154.829	157.453
ENSRNOG00000002115	Sod1	150.187	170.254	147.989	183.203	179.972	181.104	213.847	201.536	207.605
ENSRNOG00000013300	Atpif1	197.115	207.141	201.926	153.776	162.77	173.266	185.212	173.501	178.154
ENSRNOG00000004540	Clec3b	120.819	123.825	113.015	251.329	218.826	235.347	193.724	184.511	186.754
ENSRNOG00000020451	Cd81	174.015	173.351	174.568	184.358	181.849	185.461	181.048	181.611	189.15
ENSRNOG00000021031	Grn	225.247	224.399	229.728	184.982	174.754	178.531	137.668	135.192	133.233
ENSRNOG00000000777	RT1-S3	149.361	142.816	134.83	251.107	242.804	255.6	152.332	150.344	144.211
ENSRNOG00000002052	Ccdc80	167.386	166.969	166.623	250.013	252.071	244.601	123.169	122.601	126.069
ENSRNOG00000003670	Sumo2	188.269	184.78	197.343	166.926	174.582	185.063	174.174	178.265	169.997
ENSRNOG00000013090	Gadd45g	143.975	149.644	144.086	188.792	175.544	178.764	229.052	202.653	204.09
ENSRNOG00000004616	Npm1	187.227	200.127	189.784	171.088	181.849	171.14	169.859	170.092	175.216
ENSRNOG00000053468	Tuba1b	205.111	206.832	205.583	164.454	168.402	164.561	175.615	163.946	159.061
ENSRNOG00000001136	Pebp1	173.25	165.594	171.408	186.113	162.74	179.377	198.908	191.757	183.576
ENSRNOG00000018390	Pld3	321.91	302.273	312.4	91.632	91.8989	95.5188	137.444	132.477	124.574
ENSRNOG00000023972	Col4a2	208.868	189.627	206.125	205.026	194.096	202.833	141.985	133.81	126.579
ENSRNOG00000005890	Serbp1	193.618	201.858	194.483	168.468	174.273	169.594	170.33	161.572	172.908
ENSRNOG00000012852	Bin1	98.3971	95.7695	101.639	206.021	195.086	199.939	239.466	234.445	230.693
ENSRNOG00000058898	Nedd4	142.766	145.637	142.189	194.795	202.324	199.17	183.392	194.223	195.804
ENSRNOG00000018566	Ctsl	192.062	206.262	194.54	181.771	188.613	187.785	146.845	151.761	150.069
ENSRNOG00000024309	Cox6b1	165.123	180.64	176.121	183.29	165.037	170.329	188.552	179.778	188.705
ENSRNOG00000019551	Psmb6	158.752	159.466	148.033	183.373	170.695	174.172	201.471	198.247	202.65
ENSRNOG00000023086	LOC100360828	185.363	193.922	176.625	159.893	192.878	186.607	171.73	154.199	168.814
ENSRNOG00000018233	Gas6	209.184	200.49	205.75	162.293	156.762	155.105	168.798	162.154	158.617
ENSRNOG00000021102	Scn1b	78.9397	80.4452	86.4848	138.449	135.272	146.777	316.864	299.847	293.507
ENSRNOG00000014099	Krt15	156.321	159.402	162.344	162.689	157.034	156.509	208.97	204.447	207.019
ENSRNOG00000011817	Rpl22l1	153.142	154.103	156.403	182.598	197.014	196.767	178.963	174.695	180.32
ENSRNOG00000052141	Rps10l1	155.078	161.342	154.182	182.86	179.406	189.534	176.825	182.955	191.43
ENSRNOG00000020235	Hnrnpl	186.14	190.225	186.62	161.674	163.35	157.609	181.237	175.661	169.209
ENSRNOG00000012216	Tgfbi	207.961	203.282	206.637	200.726	197.897	195.164	119.251	113.472	117.636
ENSRNOG00000014635	Clta	180.282	184.416	180.329	177.635	171.576	176.193	161.888	157.541	160.593
ENSRNOG00000025179	AABR07045322.1	150.758	156.403	156.122	176.002	176.169	183.575	186.026	181.462	173.288
ENSRNOG00000014078	Ndufb8	155.635	160.342	162.44	163.85	162.324	162.894	196.567	187.849	186.512
ENSRNOG00000055562	Dkc1	160.517	154.249	166.362	170.556	165.535	167.488	193.02	178.818	160.82
ENSRNOG00000020763	Snrnp70	149.311	155.603	151.837	182.865	172.23	175.553	183.57	171.306	171.823
ENSRNOG00000013548	Selenow	126.088	452.719	194.136	529.772	46.5878	26.1275	41.1436	42.9195	53.8507
ENSRNOG00000029941	Grina	165.419	156.153	159.839	182.353	169.781	178.01	168.516	164.608	160.37
ENSRNOG00000020460	Banf1	161.556	162.745	169.901	147.989	144.101	145.04	195.715	186.813	183.653
ENSRNOG00000011912	Tmem38a	66.0509	63.5383	69.4161	192.301	178.757	191.326	252.235	246.613	232.895
ENSRNOG00000015093	Sparcl1	133.9	135.769	133.113	189.719	193.775	194.03	173.552	168.795	170.264
ENSRNOG00000047988	Bola2	166.581	168.724	173.846	179.605	173.333	171.868	161.915	152.229	144.329
ENSRNOG00000015221	Eif3f	157.322	158.652	154.53	176.297	169.909	169.976	171.853	167.821	162.848
ENSRNOG00000003977	Dusp1	234.436	224.611	229.255	137.907	133.055	133.186	137.851	128.88	124.465
ENSRNOG00000007089	Lgmn	225.318	235.537	223.904	130.427	137.032	135.691	131.703	130.571	131.81
ENSRNOG00000016151	Ankrd23	55.6375	54.8207	58.1542	159.151	142.461	152.464	292.293	283.028	281.858
ENSRNOG00000003736	Col5a2	213.861	202.414	212.267	197.403	191.183	195.088	89.7562	87.4721	89.5268
ENSRNOG00000020941	Psenen	143.087	151.363	149.155	165.491	160.722	165.003	188.493	171.368	180.088
ENSRNOG00000013754	Krt35	416.979	389.652	397.25	28.1855	27.1598	25.3427	67.6343	58.8441	60.2176
ENSRNOG00000025715	Dynlrb1	157.152	154.07	154.018	157.982	154.357	160.233	179.182	167.293	185.267
ENSRNOG00000009243	Oaf	183.313	184.826	198.838	193.288	197.386	191.073	107.74	106.766	98.605
ENSRNOG00000029682	Clic1	195.574	192.351	192.699	161.464	153.064	157.915	140.347	133.324	134.948
ENSRNOG00000010389	Ndrg2	80.2987	81.5496	81.369	164.118	163.263	170.256	246.668	236.734	233.56
ENSRNOG00000054689	Cox7b	128.327	140.735	136.513	165.435	166.999	160.205	183.487	181.752	189.513
ENSRNOG00000016257	Cotl1	259.171	245.352	252.66	130.494	126.361	122.326	107.571	104.636	99.5765
ENSRNOG00000009889	Pgm1	79.9114	78.4644	84.3935	142.362	136.534	143.109	259.896	261.456	258.762
ENSRNOG00000005963	Rab2a	170.71	171.976	167.485	164.918	161.376	173.354	140.856	141.445	150.84
ENSRNOG00000017907	Ube2i	172.69	176.472	186.461	138.652	156.124	147.799	156.654	153.849	148.526
ENSRNOG00000018816	Cox5a	155.088	162.189	155.584	166.978	148.456	151.764	171.83	159.191	156.752
ENSRNOG00000000622	Hint1	136.746	156.551	145.987	172.325	166.922	163.562	157.417	158.732	167.13
ENSRNOG00000016589	Mlf2	170.098	164.641	173.17	131.707	140.449	141.828	177.853	162.738	159.037
ENSRNOG00000019721	Ypel3	122.224	117.188	113.12	167.603	159.15	171.268	206.138	181.983	182.162
ENSRNOG00000008163	Atp6v1g1	165.097	176.39	168.018	155.357	158.269	152.002	150.035	142.546	149.648
ENSRNOG00000006992	Rpl7	133.66	138.5	134.223	168.604	169.513	167.616	165.709	163.807	169.423
ENSRNOG00000005512	Ndufa4	115.718	122.991	115.585	159.854	157.769	158.681	201.006	182.656	193.679
ENSRNOG00000002358	Scpep1	190.701	194.397	189.04	158.769	152.616	158.284	120.608	120.21	122.586
ENSRNOG00000000981	Scarb1	191.066	184.123	188.837	137.324	132.139	132.583	146.816	147.618	142.565
ENSRNOG00000025443	Map1lc3a	131.511	138.36	138.881	158.508	150.024	149.765	188.542	182.052	164.15
ENSRNOG00000059538	Clec2g	133.728	138.355	134.164	175.367	191.988	171.227	153.998	147.731	150.585
ENSRNOG00000030680	Ddx5	166.295	170.358	164.524	139.991	150.681	146.578	144.074	153.698	158.109
ENSRNOG00000012303	Apobec2	69.9005	72.8709	76.547	194.218	173.352	192.029	212.13	202.101	200.584
ENSRNOG00000015703	Hypk	146.764	173.396	159.242	149.591	164.466	156.514	150.478	151.838	140.411
ENSRNOG00000009465	Sfrp2	249.097	242.517	255.31	159.541	157.074	152.679	59.1716	57.7041	55.233
ENSRNOG00000010668	Anxa6	150.973	151.855	158.968	170.223	167.274	169.136	144.905	138.707	136.284
ENSRNOG00000017369	Mustn1	89.7369	91.9908	86.4903	218.105	240.086	242.38	142.222	140.07	135.424
ENSRNOG00000018823	Nisch	146.279	137.879	146.512	171.826	164.61	169.517	156.784	149.208	143.81
ENSRNOG00000058646	Zfp36l1	185.541	175.013	190.488	142.78	145.237	152.114	137.28	132.705	125.015
ENSRNOG00000058359	Fkbp8	159.263	152.564	164.314	157.761	149.373	155.345	158.872	148.256	140.403
ENSRNOG00000021200	Hfe2	53.8032	52.4261	56.4944	125.556	118.353	121.941	285.156	288.704	278.129
ENSRNOG00000029707	Mt-nd4	208.536	131.834	169.341	143.369	114.012	128.593	138.635	130.435	215.741
ENSRNOG00000000805	Gja1	246.184	254.633	252.411	98.5091	106.193	100.627	103.87	107.107	108.517
ENSRNOG00000003336	Mybph	65.9939	62.8716	70.0694	209.863	201.913	215.749	196.798	184.187	170.185
ENSRNOG00000056836	Cav1	138.279	140.933	135.861	169.415	174.362	172.76	144.015	148.498	149.982
ENSRNOG00000015505	Mfap5	115.631	119.924	115.676	217.607	217.423	211.006	130.665	121.411	123.298
ENSRNOG00000013653	Pdlim7	146.783	146.082	154.893	152.779	141.343	153.174	165.681	158.609	146.312
ENSRNOG00000011971	C1s	123.74	128.606	123.629	191.2	196.474	192.746	134.678	133.196	136.729
ENSRNOG00000005041	Crip2	150.266	150.022	143.441	154.239	138.533	148.196	164.171	158.052	150.911
ENSRNOG00000002721	Ndufb4	125.071	129.62	130.498	161.681	158.554	149.583	169.378	164.378	167.756
ENSRNOG00000007330	Capzb	160.405	156.832	156.073	143.675	146.948	143.627	151.855	148.027	147.274
ENSRNOG00000039980	Slc25a5	188.245	195.115	185.97	120.091	119.543	119.353	146.651	134.762	143.606
ENSRNOG00000026616	Ndufb2	123.951	142.745	133.751	150.62	143.745	153.447	168.119	167.743	168.894
ENSRNOG00000015953	Oaz2	117.372	118.436	116.879	160.514	160.053	154.445	179.344	168.854	171.231
ENSRNOG00000042821	Cd59	153.14	160.722	155.515	136.273	135.716	134.294	156.522	152.158	162.151
ENSRNOG00000001488	Psmb1	125.601	137.393	134.081	161.594	160.576	153.202	155.664	159.151	158.797
ENSRNOG00000021157	Ctss	197.983	214.443	194.116	132.914	135.151	134.684	112.387	109.366	112.209
ENSRNOG00000009421	Ivd	87.431	87.1771	88.0892	109.466	106.523	104.661	254.179	253.053	248.694
ENSRNOG00000001053	Tmed2	158.836	168.175	157.651	161.142	159.899	156.63	118.841	126.856	127.841
ENSRNOG00000020433	Actn4	186.889	180.015	180.101	124.462	126.631	126.222	140.747	138.011	132.346
ENSRNOG00000055984	Adrm1	148.536	142.585	151.987	134.12	138.002	137.165	174.483	154.348	150.063
ENSRNOG00000029574	Rps4x	131.775	133.57	132.023	156.819	156.405	151.043	160.582	153.323	154.856
ENSRNOG00000036839	Hnrnpa1	140.463	148.476	138.665	140.352	147.394	135.16	157.297	155.471	165.28
ENSRNOG00000015844	Snrpd2	144.534	140.069	141.68	161.337	148.159	153.654	148.728	141.096	148.896
ENSRNOG00000020442	Ubl5	147.955	151.655	139.157	142.615	156.29	144.05	142.993	148.625	154.144
ENSRNOG00000008994	Arpc4	176.394	172.742	171.528	152.994	143.155	137.994	116.995	124.771	130.144
ENSRNOG00000053172	Ssr4	141.532	146.864	139.176	156.067	162.838	157.824	146.381	135.034	137.301
ENSRNOG00000012457	Cyc1	145.492	147.34	145.33	138.606	129.571	138.203	165.863	153.716	152.603
ENSRNOG00000000938	Ran	167.453	170.743	176.617	122.6	132.267	130.063	139.52	131.412	143.389
ENSRNOG00000013741	Ube2d3	140.729	154.945	146.928	146.866	155.079	148.614	139.863	141.144	138.991
ENSRNOG00000057092	Slfn4	87.7829	90.4223	83.7945	225.424	236.96	232.348	117.959	117.465	120.77
ENSRNOG00000017405	Raly	151.843	145.565	151.456	147.809	142.495	149.218	147.052	141.96	135.17
ENSRNOG00000005203	Sec61g	133.174	141.748	137.019	182.456	161.026	164.75	125.579	116.979	146.321
ENSRNOG00000000064	Atp5i	126.855	131.673	127.059	161.496	161.311	148.488	157.331	143.764	151.06
ENSRNOG00000017206	Igfbp5	116.803	117.512	114.626	175.448	180.29	175.385	140.824	140.241	141.072
ENSRNOG00000016638	Gnb1	165.788	167.129	165.689	133.487	141.308	138.225	130.554	129.265	129.545
ENSRNOG00000018212	Abhd17a	158.065	147.388	160.372	136.847	129.82	142.611	152.226	140.58	129.756
ENSRNOG00000032844	RT1-Da	132.811	134.435	133.519	171.469	167.348	163.911	130.639	128.018	130.542
ENSRNOG00000016890	Tppp3	113.639	117.572	111.96	173.388	154.442	154.814	161.023	153.694	149.983
ENSRNOG00000003863	RGD1564093	151.989	147.564	143.913	144.912	143.145	140.831	145.707	139.444	132.536
ENSRNOG00000009073	Tnni1	52.8224	54.3751	57.6277	264.401	256.881	270.978	115.254	108.164	107.072
ENSRNOG00000013895	Npdc1	143.258	127.507	138.037	144.237	139.856	141.463	159.111	148.813	144.704
ENSRNOG00000018958	Mt3	308.4	314.786	304.384	45.4601	39.5469	35.4458	82.3571	72.9895	79.6238
ENSRNOG00000010966	Itgb1	162.384	168.99	164.943	148.062	149.887	146.107	109.702	111.898	118.009
ENSRNOG00000008536	Actc1	49.5049	46.4842	51.1112	285.736	268.559	284.616	103.051	93.9076	91.8458
ENSRNOG00000005428	Ctbp1	150.814	148.085	149.371	138.491	136.634	139.983	138.914	137.491	132.441
ENSRNOG00000016930	Ube2s	161.141	156.046	159.515	140.497	126.402	135.083	140.964	124.478	126.005
ENSRNOG00000050585	Pgam1	190.53	192.883	186.627	112.315	114.374	114.435	125.382	115.105	117.269
ENSRNOG00000009683	Sdcbp	151.027	162.288	161.036	146.376	150.161	140.844	112.808	119.14	122.541
ENSRNOG00000019113	Hnrnpk	145.108	149.288	148.298	134.882	138.578	138.148	133.748	135.086	140.099
ENSRNOG00000016770	Calm2	123.676	121.203	126.815	127.823	122.998	134.546	168.1	165.748	170.01
ENSRNOG00000033933	Stfa3	170.982	194.261	179.933	170.102	183.249	160.886	70.6834	62.5842	67.312
ENSRNOG00000028021	LOC684988	124.507	127.387	125.045	146.84	140.635	162.487	140.629	148.089	142.811
ENSRNOG00000021882	Tmed9	158.095	159.043	153.746	141.064	149.435	140.26	126.051	113.59	113.368
ENSRNOG00000001991	Atp5o	136.96	132.557	126.494	136.426	123.41	147.565	154.322	145.688	150.661
ENSRNOG00000004284	Btg1	156.246	171.199	162.958	134.515	134.91	134.471	113.914	125.412	119.832
ENSRNOG00000030019	Atp1a1	203.697	204.163	197.597	100.399	99.4782	99.4765	118.25	112.995	113.998
ENSRNOG00000012749	C1qb	125.184	119.336	122.249	189.914	186.017	186.654	116.731	103.206	100.032
ENSRNOG00000003809	Sat1	189.796	200.629	189.949	108.146	114.375	115.011	109.667	104.573	115.642
ENSRNOG00000049782	Csf2ra	221.147	197.944	217.995	95.5119	97.2785	95.5896	113.829	110.92	97.4546
ENSRNOG00000058132	SNORD29	67.1522	58.9064	60.5542	197.231	192.668	171.758	165.221	167.588	166.084
ENSRNOG00000028017	Tmem109	92.8179	84.9312	93.9648	144.322	138.754	148.564	185.778	182.106	170.603
ENSRNOG00000014064	Ctsh	123.812	128.325	121.164	170.177	176.215	166.591	120.069	117.472	117.874
ENSRNOG00000024568	Ndufs7	109.79	114.87	114.96	136.566	121.286	123.152	180.906	169.295	167.318
ENSRNOG00000046585	AABR07054370.1	147.345	150.008	156.023	131.875	127.085	117.124	146.951	131.803	127.181
ENSRNOG00000024689	Hopx	128.227	134.895	125.215	113.023	125.046	119.241	168.369	157.768	161.01
ENSRNOG00000059900	Bst2	100.905	107.397	102.269	205.177	186.348	184.181	123.035	114.722	108.228
ENSRNOG00000020583	Fcgrt	110.531	112.606	107.169	172.9	174.424	171.128	133.787	123.536	122.244
novel.713	-	51.0546	52.3261	53.7877	131.438	134.563	133.08	214.326	225.45	230.991
ENSRNOG00000042825	Cd300le	193.748	191.385	184.496	97.2947	103.948	97.0219	124.803	117.303	115.353
ENSRNOG00000007235	Atp5g1	123.27	127.368	122.706	137.839	137.471	128.118	147.544	149.529	147.179
ENSRNOG00000022934	RGD1562399	112.339	166.949	171.429	151.47	86.8198	170.447	147.361	103.812	109.44
ENSRNOG00000012181	Lpl	213.09	219.483	212.855	76.3985	78.6853	76.0843	105.857	111.886	116.479
ENSRNOG00000046763	Adssl1	47.7237	47.2038	48.6321	106.133	109.158	110.55	250.868	247.07	242.676
ENSRNOG00000004883	Erh	140.724	159.488	136.153	130.063	128.515	125.652	130.814	127.087	130.189
ENSRNOG00000011796	C1r	110.558	112.752	112.889	178.506	177.984	183.044	111.701	110.599	107.908
ENSRNOG00000011346	Ehd2	134.314	126.415	136.344	147.415	147.119	147.7	123.403	123.958	118.081
ENSRNOG00000016064	Tkt	185.257	192.488	187.08	95.9362	91.578	91.6265	121.28	119.452	119.443
ENSRNOG00000022392	Hspb8	86.5659	87.9443	88.2528	164.166	159.715	161.497	154.202	153.783	147.657
ENSRNOG00000049931	LOC288913	133.589	128.702	127.421	137.976	130.207	134.764	143.481	135.653	130.279
ENSRNOG00000001344	Aldh2	110.901	111.313	108.662	123.291	117.938	116.121	174.513	168.209	167.526
ENSRNOG00000003622	Cybb	253.389	258.351	249.137	56.8934	59.5702	55.8266	80.9961	91.018	91.9096
ENSRNOG00000010237	Map7d1	153.89	138.261	150.242	130.347	124.518	132.154	125.254	120.723	115.987
ENSRNOG00000056233	AC120262.1	131.285	134.44	144.94	121.471	129.1	138.515	132.65	137.485	115.953
ENSRNOG00000018916	Bcl7c	157.047	146.549	161.642	123.286	119.628	125.583	123.806	117.367	108.477
ENSRNOG00000009364	Ndufb9	120.615	125.594	121.797	134.551	129.214	134.749	140.938	139.122	134.539
ENSRNOG00000050869	Cebpd	98.562	87.2994	95.3131	127.354	119.75	129.964	187.428	176.588	158.148
ENSRNOG00000010890	Bmp1	150.179	141.669	148.279	157.598	158.065	159.865	92.6683	85.9376	85.0816
ENSRNOG00000007901	Tmed10	145.628	150.976	146.272	129.128	128.603	128.505	115.617	114.965	119.296
ENSRNOG00000007648	Rab11b	124.648	120.376	124.285	127.717	125.529	131.96	151.47	138.602	133.373
ENSRNOG00000001440	Mdh2	134.085	128.397	131.778	112.668	110.543	107.901	150.092	151.334	150.92
ENSRNOG00000022153	Tmem134	129.948	131.486	127.211	129.529	130.952	124.244	142.307	132.464	129.464
ENSRNOG00000012808	Tmem259	137.822	132.386	137.284	130.655	124.366	121.828	135.906	130.647	123.15
ENSRNOG00000048622	Sin3b	209.875	191.619	185.077	89.5808	91.788	88.6402	107.531	102.461	106.779
ENSRNOG00000020889	Nucb1	150.559	139.803	149.946	136.328	129.487	137.19	110.398	108.868	108.547
ENSRNOG00000050675	Myl4	69.5403	69.5762	65.8708	212.748	204.356	219.372	117.49	107.15	104.933
ENSRNOG00000056493	Mybpc1	56.1998	58.4927	58.188	159.43	151.138	160.534	165.76	177.423	182.931
ENSRNOG00000000610	Cisd1	110.619	116.759	120.009	125.26	116.199	131.14	149.651	144.194	153.389
ENSRNOG00000031085	Ergic3	128.977	126.114	131.677	143.594	142.517	137.15	118.961	117.262	118.122
ENSRNOG00000026293	Jun	138.561	133.698	141.206	117.646	116.131	120.804	136.869	133.259	124.937
ENSRNOG00000002746	Fstl1	121.934	128.71	127.779	176.174	178.783	170.652	83.5946	85.8844	88.7651
ENSRNOG00000011994	Perp	139.002	143.457	145.511	97.6341	100.077	99.2566	141.126	146.85	146.651
ENSRNOG00000005698	Ndufa5	94.4558	110.261	99.8147	145.608	136.295	142.575	147.509	145.573	137.056
ENSRNOG00000042094	Prr13	165.921	152.562	152.788	119.268	125.149	122.034	112.716	105.532	99.3465
ENSRNOG00000019277	Vdac3	95.8383	100.38	97.6229	127.373	134.423	128.948	158.553	157.466	153.895
ENSRNOG00000029399	Bcam	119.154	113.42	118.065	124.823	116.343	124.206	150.82	147.046	139.699
ENSRNOG00000049437	Gpc1	118.602	116.548	127.759	169.36	146.16	166.883	101.295	102.106	103.083
ENSRNOG00000022256	Cxcl10	24.1175	25.2456	27.3829	281.834	300.648	305.814	68.5879	56.4507	60.8431
ENSRNOG00000011632	Cct5	117.017	127.54	120.831	131.497	128.259	132.97	124.429	133.132	132.726
ENSRNOG00000049876	Prkar1a	129.372	126.562	125.466	130.373	132.415	132.748	125.356	119.633	125.878
ENSRNOG00000020467	Nrep	140.414	143	139.651	150.576	161.377	143.117	88.9956	87.3364	90.869
ENSRNOG00000039496	Plp2	163.861	167.886	163.309	103.34	99.9028	105.995	117.545	113.06	110.337
ENSRNOG00000045884	Gm25994	94.7746	86.3183	109.837	152.809	149.396	141.802	128.541	142.524	139.069
ENSRNOG00000020922	Hspb6	83.8571	77.8824	83.2783	153.807	141.316	149.832	162.424	147.461	142.648
ENSRNOG00000007461	Klhl41	45.3632	45.7675	49.9236	150.059	155.378	155.086	174.03	179.947	185.854
ENSRNOG00000005828	Skp1	113.616	120.881	111.363	121.957	129.361	130.229	139.749	140.171	133.522
ENSRNOG00000008329	Ndufb11	100.169	108.515	104.818	132.686	117.338	118.085	155.616	146.346	157.057
ENSRNOG00000015642	Pabpc4	99.4092	98.8617	100.282	131.444	122.623	132.456	149.259	154.931	150.518
ENSRNOG00000001224	Itgb2	250.529	250.862	253.932	41.1873	42.2052	44.2614	87.4373	86.1361	81.0353
ENSRNOG00000012623	Arf4	147.986	152.87	145.995	135.024	136.302	132.633	93.8531	90.8564	99.4343
ENSRNOG00000023465	LOC500300	70.2649	66.6364	68.1271	142.424	137.579	143.715	173.821	160.784	167.603
ENSRNOG00000012659	Vamp5	56.1796	61.794	59.3669	118.726	110.816	120.55	213.095	196.471	193.532
ENSRNOG00000013492	Cap1	148.193	146.944	146.239	123.228	118.58	121.8	109.826	107.036	107.213
ENSRNOG00000012074	Ifngr1	119.164	118.932	117.323	137.016	131.808	136.14	123.104	124.734	120.561
ENSRNOG00000001551	Atp5j	119.346	129.348	117.245	117.86	131.071	118.721	137.137	127.123	130.873
ENSRNOG00000050197	Pdia6	141.1	140.769	138.727	130.522	124.775	127.817	107.09	110.443	106.258
ENSRNOG00000007392	Atp6v1f	147.957	148.045	146.837	115.807	103.707	104.547	123.703	116.15	119.775
ENSRNOG00000005569	Phospho1	60.9151	57.4919	60.4391	94.1344	92.4459	95.5719	234.834	222.273	207.59
ENSRNOG00000002389	Morf4l2	135.382	131.782	129.852	127.711	136.955	133.101	109.339	105.755	112.506
ENSRNOG00000018468	Ldb1	133.094	126.165	138.421	116.654	111.965	114.76	133.804	125.344	120.983
ENSRNOG00000021104	Emp3	165.428	157.165	159.285	111.094	111.058	110.12	104.275	102.06	100.438
ENSRNOG00000058006	Sncg	103.004	110.545	99.0888	117.232	101.914	106.864	168.683	154.47	158.935
ENSRNOG00000051615	Hmgn2	118.868	131.458	124.032	131.424	129.383	128.027	123.767	113.822	119.406
ENSRNOG00000016587	Ninj1	132.985	124.77	133.512	142.285	139.215	140.186	106.248	101.563	99.0368
ENSRNOG00000001229	Col18a1	138.844	132.06	134.659	137.491	130.815	137.098	104.502	101.683	100.866
ENSRNOG00000004578	Cthrc1	139.499	148.962	149.951	143.365	141.21	146.073	84.4945	79.5231	84.5639
ENSRNOG00000020464	Mrpl54	120.749	116.174	121.148	127.08	120.114	117.115	140.181	136.184	117.738
ENSRNOG00000012582	Eif4ebp1	89.4872	86.6938	94.3801	125.667	122.352	127.638	168.318	153.524	147.668
ENSRNOG00000020495	Eif3k	115.057	118.793	114.253	135.977	123.711	126.462	127.075	125.745	127.822
ENSRNOG00000021132	Trmt112	122.949	118.122	112.639	132.221	121.023	128.796	131.15	117.935	129.167
ENSRNOG00000008516	LOC688684	97.3367	121.955	101.555	133.697	144.924	131.571	132.177	126.132	123.451
ENSRNOG00000001454	Eif4h	135.764	125.053	128.443	118.814	123.292	123.629	119.919	116.307	117.403
ENSRNOG00000019004	Mt4	322.873	335.644	323.587	11.1875	15.3515	13.6251	22.7944	33.0766	28.6693
ENSRNOG00000004273	Ifitm1	136.196	152.866	147.462	119.8	121.59	112.862	109.216	102.864	103.343
ENSRNOG00000001420	Fis1	110.599	105.003	105.424	133.643	120.319	128.811	141.805	130.745	126.783
ENSRNOG00000020308	Ech1	69.3327	69.4935	71.3859	120.666	123.136	125.82	173.233	173.055	176.512
ENSRNOG00000022860	Swi5	144.684	136.388	136.773	117.223	116.455	114.416	123.665	104.166	108.344
ENSRNOG00000053450	Myadm	146.525	146.129	140.826	115.136	122.378	119.92	102.608	103.057	104.296
ENSRNOG00000048342	Tbca	115.269	129.801	120.599	116.588	129.608	124.983	117.387	122.607	123.959
ENSRNOG00000019648	Col6a3	119.01	120.611	122.828	160.776	162.08	162.726	84.9474	82.9447	84.804
ENSRNOG00000012630	Rhoc	150.991	149.79	147.246	122.503	119.344	120.77	100.736	91.7958	96.9238
ENSRNOG00000005924	Dstn	123.939	128.818	122.775	133.19	132.255	128.392	109.198	104.631	116.352
ENSRNOG00000001815	Eif4a2	87.6654	91.7761	89.4709	125.079	138.133	126.641	143.076	143.987	152.466
ENSRNOG00000006283	LOC100362400	110.754	112.352	109.338	143.915	126.547	127.594	129.619	119.561	118.565
ENSRNOG00000048273	Apod	38.8942	44.0112	37.6054	119.319	117.169	121.151	208.023	205.537	205.957
ENSRNOG00000058470	Col12a1	202.018	205.892	208.217	124.703	121.523	124.65	36.625	36.0147	37.5314
ENSRNOG00000020636	Spint2	148.707	138.089	144.012	98.2805	91.0202	92.7549	136.313	125.958	118.05
ENSRNOG00000039861	LOC690617	187.035	182.775	176.343	96.0776	84.9143	92.6088	92.4185	88.1053	91.579
ENSRNOG00000028629	Akt1	137.156	130.846	133.269	124.323	122.323	125.915	107.529	109.633	98.8301
ENSRNOG00000020300	Lsp1	137.886	122.968	124.445	134.225	137.222	135.933	106.922	93.688	96.4049
ENSRNOG00000043114	Tomm7	85.0334	98.5429	93.2793	139.081	142.541	127.343	138.27	127.464	133.65
ENSRNOG00000049918	Lrg1	134.194	120.877	129.537	112.64	110.304	108.253	130.272	123.943	114.025
ENSRNOG00000050044	Ptp4a2	109.64	110.88	116.734	117.177	126.241	125.403	122.557	122.437	131.187
ENSRNOG00000028062	Arpc5	146.379	148.684	143.936	114.527	120.436	113.419	97.2368	97.4376	98.7392
ENSRNOG00000012985	Pfdn5	95.4986	94.177	95.6814	138.325	140.463	144.738	129.916	122.559	118.89
ENSRNOG00000004992	Rab1a	141.011	148.177	143.569	111.513	120.548	110.486	99.3537	99.8838	105.333
ENSRNOG00000057284	Cenpb	124.582	112.786	123.758	117.363	108.271	116.92	127.805	129.54	116.851
ENSRNOG00000028717	Ndufb7	107.238	108.579	110.591	121.459	114.304	115.315	138.872	129.277	130.815
ENSRNOG00000046345	Rpn1	126.475	127.644	128.09	126.599	123.875	121.216	104.851	107.07	110.23
ENSRNOG00000054890	Flna	157.289	154.15	153.214	110.411	101.819	105.371	96.9589	97.158	99.2037
ENSRNOG00000021259	Prnp	95.8519	96.3623	95.5525	122.713	123.087	121.019	139.431	141.917	138.259
ENSRNOG00000007048	Rap1b	149.476	149.017	148.036	113.145	112.842	114.077	91.9812	89.5074	102.173
ENSRNOG00000013949	Idh2	80.2465	81.7168	79.9278	133.189	125.966	132.716	146.755	145.159	143.922
ENSRNOG00000019773	Egln1	116.608	104.253	108.038	108.135	106.79	108.936	141.024	139.988	133.775
ENSRNOG00000007390	Nfkbia	103.855	100.235	103.944	124.34	118.014	121.772	132.092	133.39	129.744
ENSRNOG00000049661	Inafm1	107.988	100.228	104.819	123.907	124.71	127.314	137.837	128.574	111.053
ENSRNOG00000006345	Sec61b	133.479	148.838	142.313	122.211	118.365	116.324	97.1073	88.2921	97.3538
ENSRNOG00000047309	Smim10l1	96.9524	108.868	104.064	131.413	119.181	123.314	120.319	136.736	122.498
ENSRNOG00000014201	Manf	133.861	151.803	139.303	120.213	123.351	111.333	93.6861	92.7022	96.367
ENSRNOG00000024239	Fam89b	113.435	110.14	113.007	123.01	116.891	123.639	130.079	119.163	111.175
ENSRNOG00000019682	Timm13	118.991	129.814	132.512	115.825	111.658	105.172	120.847	116.478	107.815
ENSRNOG00000028238	Sh3bgr	68.7538	62.4531	68.0998	106.305	109.203	105.052	179.465	183.982	174.697
ENSRNOG00000030712	RT1-A2	83.1209	79.1412	78.9416	144.32	144.09	152.822	127.51	122.698	118.56
ENSRNOG00000013386	Psmb5	110.692	115.114	117.973	114.397	108.474	111.085	126.709	120.014	123.496
ENSRNOG00000000701	Iscu	99.5787	95.2448	92.5877	126.852	121.276	124.972	137.962	121.821	125
ENSRNOG00000012053	S100a16	127.246	127.35	132.664	104.191	108.82	111.097	112.709	107.036	113.516
ENSRNOG00000046705	Snx3	111.977	114.41	111.004	122.16	127.096	119.437	113.847	110.599	112.403
ENSRNOG00000003338	Pmp22	86.834	88.3002	86.5969	88.9745	85.8987	89.4855	167.67	173.653	171.734
ENSRNOG00000019387	Ifi30	169.006	170.376	168.881	89.4026	88.2103	90.0479	86.048	88.4082	88.7435
ENSRNOG00000018529	Csnk1g2	112.503	111.144	110.792	119.601	114.197	117.197	122.46	119.293	111.122
ENSRNOG00000019532	Emc10	132.438	125.897	130.186	115.147	116.385	122.511	100.789	99.1795	95.5476
ENSRNOG00000013562	Ndfip1	130.958	133.246	131.817	113.673	111.928	109.87	98.0461	105.012	103.286
ENSRNOG00000055319	Mrfap1	115.946	120.959	115.497	119.521	126.331	117.056	103.617	105.273	112.616
ENSRNOG00000007475	Gpihbp1	72.1054	72.1963	69.0023	137.443	129.732	128.061	146.576	141.471	140.101
ENSRNOG00000019895	Nedd8	118.748	115.794	118.342	115.227	107.547	115.757	117.714	110.179	116.825
ENSRNOG00000050401	Vbp1	118.113	111.774	105.469	118.093	110.888	119.623	123.883	115.44	112.316
ENSRNOG00000048199	Rps19	88.8837	87.9868	70.0079	174.887	181.529	111.161	106.584	115.283	97.508
ENSRNOG00000019666	Ubxn1	108.834	110.346	112.671	111.601	116.493	114.332	129.129	112.689	117.673
ENSRNOG00000014415	Hsbp1	123.057	133.12	129.741	101.124	105.337	102.636	110.827	110.676	116.589
ENSRNOG00000051831	5_8S_rRNA	320.905	372.304	283.378	12.4793	11.3113	5.52666	8.06307	7.74814	10.545
ENSRNOG00000047374	Gnas	98.4223	107.859	100.52	124.253	128.034	122.272	120.616	115.474	113.749
ENSRNOG00000055564	RGD1564664	148.719	140.151	141.128	107.708	102.233	105.584	102.288	96.3102	83.8499
ENSRNOG00000049402	Nbl1	104.55	104.916	108.384	130.184	127.749	132.902	110.978	104.127	103.338
ENSRNOG00000059947	Sdc1	150.256	144.74	147.463	86.0833	83.072	85.485	112.549	109.165	106.958
ENSRNOG00000048174	Uqcrq	106.001	111.78	106.809	116.617	103.676	115.708	133.573	115.509	115.646
ENSRNOG00000049495	Krt71	245.504	241.592	248.327	36.5658	35.452	35.5523	64.0219	59.2287	57.9724
ENSRNOG00000012383	Ndufc2	105.35	112.343	106.922	111.946	112.704	106.452	122.84	116.228	125.495
novel.955	-	112.739	119.303	108.093	116.809	124.911	110.155	107.228	104.196	115.716
ENSRNOG00000010529	Thbs2	182.47	178.202	187.297	110.178	110.004	111.226	43.4968	46.7622	45.7172
ENSRNOG00000018367	Taldo1	151.87	146.004	142.119	90.2098	87.3099	82.755	103.101	105.737	106.03
ENSRNOG00000020619	Eif3g	111.63	109.504	110.158	105.834	109.632	112.578	116.641	117.393	119.018
ENSRNOG00000060728	Tuba1a	109.616	112.968	110.548	136.84	142.413	136.877	89.7345	85.0426	87.2458
ENSRNOG00000011782	Got2	101.763	105.797	106.317	114.103	116.192	115.895	119.035	116.54	115.009
ENSRNOG00000018294	Hspa5	149.831	150.899	147.902	102.016	104.112	103.635	83.9217	82.8693	82.7364
ENSRNOG00000011414	Psmc3	121.664	116.436	117.95	105.291	104.772	105.827	115.034	110.124	109.701
ENSRNOG00000017506	Cltb	108.404	115.056	107.39	101.008	107.028	98.2774	126.019	122.013	120.648
ENSRNOG00000041449	Gm23880	114.558	94.9048	98.681	94.2877	97.1479	100.804	163.181	137.991	103.693
ENSRNOG00000019698	Ssbp4	125.454	110.525	124.155	106.002	108.753	108.141	113.736	111.75	96.7117
ENSRNOG00000021082	Kdelr1	112.656	114.134	113.696	126.501	119.987	119.817	96.9438	100.052	100.503
ENSRNOG00000034242	Vcp	110.275	110.38	111.144	110.109	107.047	111.406	110.225	117.196	116.284
ENSRNOG00000014656	Cox8b	49.6034	57.7984	58.0106	138.328	117.32	120.276	154.69	141.746	166.01
ENSRNOG00000008103	Mdh1	99.3373	99.284	94.5624	104.296	99.3912	100.183	134.984	134.828	135.708
ENSRNOG00000051624	Hspe1	112.675	117.372	111.765	102.498	113.634	92.6337	118.811	118.61	114.099
ENSRNOG00000011557	S100a8	172.552	198.282	185.036	78.0781	75.6005	81.0254	68.4062	72.9217	68.221
ENSRNOG00000012247	Rab7a	126.073	126.854	126.437	98.1873	105.366	103.951	103.57	102.127	106.273
ENSRNOG00000036301	AC128792.1	131.463	127.26	114.71	108.575	96.94	112.179	95.8766	91.5993	119.974
ENSRNOG00000050485	Gas1	110.79	96.3876	103.783	133.191	110.23	128.865	109.841	110.01	92.1041
ENSRNOG00000046005	Scd2	124.918	126.265	125.304	88.0269	90.6088	88.3535	114.068	117.768	117.588
ENSRNOG00000054172	Ctnnb1	126.116	120.387	126.461	100.423	98.1944	94.811	107.345	107.686	111.019
ENSRNOG00000032134	Uqcrc1	106.929	104.354	109.935	108.471	100.898	105.403	122.11	119.927	113.622
ENSRNOG00000013279	LOC681458	53.2514	54.2266	54.4315	91.3559	101.63	91.2962	176.692	182.665	185.566
ENSRNOG00000019388	Egfl7	105.413	105.675	111.593	120.353	117.154	121.269	106.476	102.976	99.859
ENSRNOG00000012999	Phb2	111.408	114.609	114.755	101.489	100.83	107.588	116.702	111.808	111.383
ENSRNOG00000016460	Clu	63.7989	62.1075	65.1418	103.474	103.065	104.515	163.717	163.788	160.333
ENSRNOG00000029996	LOC103691939	107.789	109.882	110.324	112.483	111.849	121.171	102.006	107.819	106.528
ENSRNOG00000006818	Arl6ip5	94.2155	99.7899	100.202	125.29	121.707	126.335	105.666	108.674	104.915
ENSRNOG00000007967	Sdhb	98.4068	107.113	101.039	107.048	105.35	106.56	114.553	122.118	123.958
ENSRNOG00000019629	Lamp1	105.024	105.941	105.493	110.56	108.811	114.666	108.75	114.166	111.636
ENSRNOG00000016507	LOC687679	90.0058	101.387	89.5504	113.723	121.685	124.118	111.701	105.981	120.457
ENSRNOG00000013265	Tgfbr2	119.92	119.061	117.802	108.569	103.716	108.032	98.9848	100.958	99.9163
ENSRNOG00000010420	Sem1	98.9298	106.783	101.004	107.13	115.491	109.628	114.292	109.378	113.432
ENSRNOG00000020358	Ptov1	102.97	105.498	106.142	115.93	102.951	111.13	114.011	111.426	103.089
ENSRNOG00000018281	Uqcrfs1	106.528	106.737	98.7174	105.145	104.875	103.018	119.385	113.942	113.842
ENSRNOG00000038372	Ndufs2	98.5066	100.878	97.0074	106.206	103.15	103.264	123.01	120.981	117.967
ENSRNOG00000015865	Ap2s1	124.957	122.394	119.437	115.252	99.9309	112.123	92.0105	91.8174	91.9946
ENSRNOG00000007743	Mgst1	76.9069	83.027	77.3565	101.161	94.0463	90.3991	141.731	146.712	158.292
ENSRNOG00000002365	Itm2a	91.8827	93.5272	88.2673	125.309	126.606	127.781	104.707	103.837	107.32
ENSRNOG00000031475	Col16a1	154.549	140.056	150.497	123.237	116.43	121.055	56.5147	55.6429	50.8388
ENSRNOG00000015385	Pink1	55.2551	53.9935	53.8305	112.038	106.728	110.653	157.466	160.428	155.471
ENSRNOG00000043328	Chmp2a	107.014	107.406	111.467	105.264	109.521	103.796	110.508	105.145	105.462
ENSRNOG00000010208	Timp1	122.051	123.942	125.429	124.995	117.3	116.91	80.8143	77.963	75.4111
ENSRNOG00000025602	Cdk4	118.882	115.94	117.603	96.42	100.693	102.51	106.798	100.46	103.907
ENSRNOG00000014562	Hnrnpf	123.989	121.906	120.943	97.4603	99.4737	99.5475	98.6849	98.5601	99.3753
ENSRNOG00000048320	Ndufa11	88.4782	92.9026	87.3996	107.361	103.103	103.957	124.923	129.436	122.373
ENSRNOG00000017354	Zyx	122.776	114.842	118.987	114.284	108.482	111.358	93.1931	89.2663	86.6501
ENSRNOG00000031802	LOC691427	94.2955	98.8211	96.6221	96.7995	114.666	112.917	108.181	121.539	115.39
ENSRNOG00000008436	Krt85	251.838	279.921	290.692	13.5028	13.2012	13.8017	31.9552	32.374	31.6039
ENSRNOG00000019980	Tomm20	100.998	110.54	100.841	113.596	110.758	113.032	102.864	101.496	104.444
ENSRNOG00000010549	Tspo	108.348	103.701	107.8	117.199	98.9468	109.666	108.178	103.751	100.618
ENSRNOG00000005809	Arhgdib	132.011	130.769	125.796	106.209	106.643	106.779	83.285	86.2401	79.1281
ENSRNOG00000018568	Rab5c	120.892	120.609	117.453	110.09	103.694	109.503	92.8644	88.5749	92.8299
ENSRNOG00000008257	Mfap2	109.641	96.905	102.649	135.105	124.222	131.508	87.2088	82.3831	86.6905
ENSRNOG00000003163	Sdhc	107.602	110.578	106.508	101.454	98.3187	96.03	112.731	110.295	112.39
ENSRNOG00000057080	-	117.6	115.175	120.506	99.7409	106.012	88.6071	98.7855	99.1398	109.07
ENSRNOG00000017416	Ppic	127.395	132.311	128.86	117.442	126.512	121.79	70.034	63.9191	65.4446
ENSRNOG00000031364	Kif1c	90.7463	86.9241	91.8918	94.5908	90.8657	92.1973	134.655	139.336	131.782
ENSRNOG00000049920	Psma2	96.0368	106.625	101.21	108.319	110.887	101.707	111.844	108.832	105.058
ENSRNOG00000000525	Pi16	91.4134	89.2615	93.3868	138.885	134.378	140.062	92.8961	85.2703	84.1205
ENSRNOG00000011501	Atp1b3	118.522	118.007	119.11	99.4222	103.821	99.7963	96.293	94.1466	100.517
ENSRNOG00000026646	Ndufs5	100.988	115.778	101.257	102.918	100.587	104.277	111.289	102.283	109.66
ENSRNOG00000049900	Irf2bp2	143.592	117.71	135.365	85.5822	79.0434	87.5577	101.058	101.881	95.2647
ENSRNOG00000021828	Coro1b	111.375	111.299	111.376	112.553	102.099	105.614	101.497	96.641	93.5808
ENSRNOG00000050547	Syngr2	98.9149	99.1944	100.676	98.3929	94.1581	105.083	122.024	112.603	112.06
ENSRNOG00000018487	Slc3a2	130.995	126.13	126.321	84.8486	78.1745	79.8134	108.538	102.843	104.562
ENSRNOG00000011946	Ptn	135.156	140.116	135.531	93.7659	103.293	96.338	79.0594	77.9968	80.6332
ENSRNOG00000007060	Plin2	100.197	99.6658	99.2308	87.7389	89.9046	93.6218	126.207	121.521	122.407
ENSRNOG00000039783	Rpl26-ps2	82.9576	97.3704	83.7252	105.953	114.215	117.281	106.895	120.248	111.589
ENSRNOG00000004628	Dazap2	109.136	113.282	118.455	96.307	94.1713	99.5379	104.139	103.822	97.6152
ENSRNOG00000004526	Cox7a2l	88.4224	91.9131	89.434	118.571	112.631	113.229	104.409	104.354	111.389
ENSRNOG00000037563	Cd68	152.325	165.375	160.515	74.8755	67.1998	72.0122	82.7924	80.4229	78.2719
ENSRNOG00000046883	Mydgf	106.96	115.092	107.879	108.949	104.689	113.869	98.1446	91.8174	86.2341
ENSRNOG00000020150	Il18bp	184.057	189.27	181.222	45.087	43.3122	51.4907	81.325	79.3574	77.4788
ENSRNOG00000003206	Actr3	129.865	132.026	132.817	93.5995	98.493	94.2533	81.662	81.2423	86.5538
ENSRNOG00000007338	Fbln2	106.433	101.463	106.375	123.945	118.544	121.764	86.2978	81.5254	82.8025
ENSRNOG00000018462	Rabep2	54.7265	56.3111	58.4155	89.1867	92.867	93.038	160.098	165.13	159.347
ENSRNOG00000017801	Atf4	110.666	108.461	108.224	103.641	106.715	108.149	94.6282	93.842	93.9023
ENSRNOG00000019655	Atp6v0b	132.697	140.438	131.785	86.4421	83.7334	82.6123	91.1866	89.6471	89.0031
ENSRNOG00000029028	Mknk2	107.532	104.874	109.936	95.8045	88.7083	92.5278	113.298	109.087	104.676
ENSRNOG00000014624	Selenok	78.2668	79.1122	79.935	110.622	117.066	107.379	122.203	114.073	117.745
ENSRNOG00000037402	Cops9	93.6563	91.6322	91.3048	115.022	104.604	101.891	114.348	107.442	103.693
ENSRNOG00000028548	Ccl9	231.113	238.637	221.841	21.1983	22.5797	21.1641	52.2382	57.4564	57.2666
ENSRNOG00000046349	AABR07067829.1	71.5885	79.8834	83.8482	113.65	121.041	113.794	98.2735	133.588	107.775
ENSRNOG00000013552	Scd	118.797	121.301	118.072	81.0427	85.7945	81.5465	99.5321	107.666	109.581
ENSRNOG00000008178	Nxn	113.508	102.725	115.228	99.8132	96.9627	101.029	102.27	98.4849	91.9108
ENSRNOG00000026260	Rpl11	89.0133	94.5873	92.0488	111.219	112.131	111.14	106.352	100.98	104.383
ENSRNOG00000023360	Fus	96.599	103.395	91.7861	100.519	110.848	96.2872	107.581	104.561	108.743
ENSRNOG00000004252	Eif3h	109.84	114.207	89.8783	134.447	69.387	127.921	119.872	66.6818	86.4557
ENSRNOG00000020289	Akt1s1	96.7492	88.9744	94.6806	98.0225	92.9764	101.586	119.608	114.187	110.062
ENSRNOG00000055314	Msrb1	92.0933	93.2063	93.0403	92.0363	89.1829	91.2842	129.659	121.021	113.799
ENSRNOG00000051450	Abracl	125.636	131.332	128.47	92.9649	96.7071	98.2333	81.3395	77.3083	82.4586
ENSRNOG00000009090	Dad1	113.766	111.799	105.935	101.336	111.051	103.49	90.3667	87.0336	88.9048
ENSRNOG00000009778	Tmem59	98.2655	102.721	101.403	111.552	109.761	112.786	92.5897	90.4499	91.5634
ENSRNOG00000021027	Dbp	85.0886	82.3374	84.6479	109.034	106.036	106.784	115.385	110.348	110.044
ENSRNOG00000054344	Ier2	123.767	118.574	122.13	89.1885	89.2542	92.5752	95.0713	91.9724	85.0596
ENSRNOG00000037247	Rras	97.9501	92.08	96.8868	108.698	107.254	112.151	110.132	92.0444	90.2598
ENSRNOG00000052730	Psmb3	95.5422	97.5816	98.8269	105.816	93.4627	97.2955	111.074	103.927	103.831
ENSRNOG00000026124	Id3	96.2518	98.4311	108.348	100.591	88.3273	101.705	108.731	104.316	99.6221
ENSRNOG00000036852	Pcbp2	100.267	99.0217	94.4304	105.189	107.575	102.204	97.6573	98.8069	99.8088
ENSRNOG00000028384	Npepl1	93.5931	89.2986	93.1287	100.832	98.6816	104.406	116.335	106.123	102.293
ENSRNOG00000017571	Ndufa2	89.7688	89.3063	96.1947	107.684	101.598	109.472	105.112	102.619	101.599
ENSRNOG00000021206	Pla2g16	60.3116	63.8334	62.8036	124.014	119.074	121.104	120.164	113.735	115.217
ENSRNOG00000008604	Nsfl1c	95.5467	93.9774	92.6958	102.316	97.4071	97.9214	106.686	105.903	107.156
ENSRNOG00000016892	Nr2f6	115.814	107.793	114.583	95.6903	87.4516	89.1671	104.045	96.5333	84.0171
ENSRNOG00000016686	Tmem167a	111.543	117.54	118.866	104.355	96.3967	109.857	85.3981	78.4038	72.0576
ENSRNOG00000008569	Ndufa6	80.7353	80.099	79.0836	105.663	112.558	101.711	111.695	107.005	115.648
ENSRNOG00000010184	Brk1	103.171	108.779	99.8321	96.4962	99.4781	100.326	97.0735	93.282	95.3788
ENSRNOG00000028411	Pcnp	92.3932	100.063	97.6888	102.825	102.971	95.5477	97.9411	95.8914	104.804
ENSRNOG00000016488	Pltp	113.738	108.62	107.772	106.833	102.93	100.478	86.7978	81.1218	79.5797
ENSRNOG00000007114	Psma6	86.2116	94.1949	87.3801	99.7491	104.661	98.4028	104.748	106.859	105.599
ENSRNOG00000015845	Fam129b	136.732	131.811	131.408	83.0449	77.1092	80.4801	85.2907	81.6985	80.1069
ENSRNOG00000008673	Arpc3	118.251	129.111	115.899	90.1391	87.8988	88.7648	83.9496	82.3605	90.1704
ENSRNOG00000028956	Mbd3	106.334	97.65	102.882	96.4662	87.8873	96.8754	102.734	99.2272	94.9551
ENSRNOG00000011101	Twist1	118.377	120.229	124.736	110.062	122.517	116.405	58.7087	59.9591	53.5574
ENSRNOG00000031244	LOC108349606	96.487	78.5419	88.0426	101.076	87.4618	105.946	97.5627	114.763	113.964
ENSRNOG00000013514	Maf1	79.8328	78.5661	79.3768	105.29	96.7421	101.532	116.441	114.466	110.771
ENSRNOG00000010918	Cebpa	110.039	99.0148	108.341	69.3665	70.9767	69.8323	125.27	121.243	108.717
ENSRNOG00000001068	Rac1	103.181	110.984	108.762	97.1222	97.1977	95.9119	90.2697	88.6808	90.3726
ENSRNOG00000017952	2019-09-02	108.583	111.998	105.464	102.184	106.385	105.913	79.8242	80.3684	81.2836
ENSRNOG00000018273	Ncl	112.757	119.25	111.258	85.7997	90.7167	84.472	92.2131	91.6504	92.8284
ENSRNOG00000000521	Cdkn1a	64.9837	66.7908	68.2431	111.622	106.778	113.34	120.925	114.436	112.353
ENSRNOG00000018993	Ilk	99.6838	97.7133	98.1991	100.235	103.582	105.972	92.2994	90.679	90.7753
ENSRNOG00000007336	Churc1	78.5278	84.5451	83.7217	109.339	109.198	101.097	103.646	102.115	105.081
ENSRNOG00000009225	Copz2	109.859	107.759	104.943	118.491	104.496	114.428	74.7491	69.112	71.3865
ENSRNOG00000038883	LOC294154	87.651	86.8883	89.6709	93.8542	90.2518	92.3373	111.586	112.628	110.263
ENSRNOG00000031965	Impdh2	86.77	86.5446	90.0001	96.9807	96.3517	91.0907	109.39	109.457	108.107
ENSRNOG00000017441	Tpm3	117.049	115.427	112.444	99.2156	99.1157	97.8687	77.2348	76.5042	79.4473
ENSRNOG00000003542	Hcfc1r1	77.742	99.1791	87.1652	109.682	99.8867	99.2262	109.298	96.9646	94.0981
ENSRNOG00000058388	Zfp36	106.516	99.1851	101.512	87.2825	85.1826	90.5895	102.447	103.306	97.2097
ENSRNOG00000000541	Glo1	90.4164	91.4881	85.4365	96.9889	94.0877	96.5438	103.38	105.069	106.984
ENSRNOG00000042195	Pabpn1	93.6678	100.893	94.1093	95.2218	96.2477	99.8452	100.385	92.5297	95.7587
ENSRNOG00000039207	Ccdc71l	118.831	104.421	121.815	85.1359	88.2265	86.0517	95.382	93.7377	74.9328
ENSRNOG00000019572	Lsm4	107.933	103.199	104.278	86.8034	88.2177	90.5564	101.498	92.1429	90.7902
ENSRNOG00000009773	Elovl4	48.9702	52.9143	53.4814	72.9623	79.2516	76.5164	153.898	160.601	166.354
ENSRNOG00000004757	Tmem158	72.548	63.9774	72.1559	118.921	100.965	109.401	119.549	116.179	89.7277
ENSRNOG00000017560	Mdk	103.411	102.698	105.353	109.016	101.039	107.603	85.6327	73.0492	75.2265
ENSRNOG00000059166	Ldb3	47.0091	45.4831	47.8984	87.5753	84.125	87.1316	163.273	150.895	149.529
ENSRNOG00000015079	Ddost	108.101	107.951	109.121	101.23	97.6774	94.4366	84.8726	79.712	79.6048
ENSRNOG00000003846	Pitpna	114.301	111.947	122.006	89.1676	92.3701	92.4773	84.3548	78.0781	77.2149
ENSRNOG00000002548	Tnn	172.415	171.442	176.857	94.7013	94.1587	95.8984	18.4332	18.4912	18.8289
ENSRNOG00000020455	Cst6	132.028	125.502	124.27	55.387	53.4346	54.8741	108.555	101.341	101.668
ENSRNOG00000002730	Rgs5	114.234	121.846	121.108	114.049	108.165	111.512	53.2872	54.9325	56.3862
ENSRNOG00000006375	Vdac1	72.0631	73.6657	70.5928	92.9323	92.631	90.5769	115.108	121.4	126.461
ENSRNOG00000001889	Comt	119.607	122.206	114.446	72.9094	69.1566	68.1606	96.7357	96.2008	95.9203
ENSRNOG00000020527	Drap1	106.105	104.783	101.71	94.7571	91.4707	92.7296	91.4603	85.8404	86.1976
ENSRNOG00000017106	Csnk1a1	92.4309	98.5781	94.6361	97.4146	97.4327	96.5183	90.2477	94.5421	91.9999
ENSRNOG00000007921	Hnrnpm	100.738	99.065	106.177	92.0516	86.5811	89.0948	92.3829	93.0792	93.4101
ENSRNOG00000058340	Krt79	48.3388	49.5904	47.7659	82.9646	86.5201	77.9227	158.603	150.009	149.837
ENSRNOG00000047179	Aplp2	102.233	102.348	99.3714	85.5106	90.5499	87.7035	94.5609	94.3844	94.5889
ENSRNOG00000019244	Mxra8	106.005	103.086	109.341	114.493	108.345	112.524	68.3402	64.589	63.626
ENSRNOG00000010298	Xbp1	94.525	93.1629	87.0766	94.4778	93.9172	96.5105	98.3298	98.8393	93.1193
ENSRNOG00000018691	Ccnl2	87.7443	83.7602	84.3194	106.746	101.484	105.647	96.6309	88.5652	94.4843
ENSRNOG00000055471	Ywhah	96.7015	104.841	99.376	99.8746	101.996	103.37	82.031	80.2932	80.865
ENSRNOG00000033790	Hnrnpu	97.5881	105.92	97.618	91.0347	95.7155	89.8998	90.9205	87.7344	92.5645
ENSRNOG00000017279	Tmem50a	97.2677	101.453	103.147	97.0722	96.1695	96.0145	89.8456	83.2879	83.3738
ENSRNOG00000003951	Psmc1	92.0679	90.6589	88.9029	92.3051	97.5425	98.5593	95.1789	95.2737	97.1102
ENSRNOG00000006939	Ndufa7	75.0085	79.6603	75.4245	100.143	97.5536	96.1089	103.61	110.996	108.02
ENSRNOG00000009266	Anp32b	97.0971	101.93	102.054	89.1412	89.8568	86.4762	83.5052	93.7082	102.708
ENSRNOG00000015753	Epn1	99.9104	87.2336	93.9191	86.7498	83.652	91.262	104.773	101.226	95.9106
ENSRNOG00000004143	Adipor1	97.6598	94.2212	95.906	91.4067	91.3657	88.3161	94.8626	94.0009	96.3815
ENSRNOG00000011592	Lrp10	111.198	104.214	110.416	90.9151	85.3687	88.287	88.7938	84.2591	80.6417
ENSRNOG00000017144	Mea1	88.2662	91.754	89.6289	93.2376	92.1989	97.8264	99.6793	97.7378	91.3294
ENSRNOG00000049785	Ranbp3	95.5753	86.1075	94.3113	87.0641	91.0095	92.4379	106.717	94.759	93.4028
ENSRNOG00000005478	Fkbp9	112.199	109.636	108.514	109.004	109.047	109.269	60.075	60.7352	62.8225
ENSRNOG00000050473	Rps27l	85.1889	90.6188	86.3586	98.1633	100.636	100.518	91.539	91.8928	96.2532
ENSRNOG00000046002	LOC301124	83.395	86.0846	84.8261	102.014	93.7303	94.6539	99.8668	97.5235	97.5887
ENSRNOG00000015733	Myl12b	101.664	101.357	97.5777	92.1471	94.3265	90.8892	90.4834	86.4283	83.1614
ENSRNOG00000004820	Sar1b	48.7864	52.1023	51.5094	71.6669	76.8448	72.1235	156.344	151.935	153.545
ENSRNOG00000002928	Guk1	97.8471	97.6818	100.045	99.1025	86.2133	92.0824	87.4692	88.0299	85.2749
ENSRNOG00000012156	Ostf1	110.988	120.071	112.526	83.2597	90.2447	81.6589	81.863	75.2035	77.8885
ENSRNOG00000034071	Chmp4bl1	101.447	101.665	94.4553	89.0773	90.52	85.5986	91.3499	92.7404	85.149
ENSRNOG00000059116	Cux1	111.228	112.726	113.453	62.5633	64.1702	64.9884	101.155	100.519	100.15
ENSRNOG00000020876	Bax	104.228	103.559	102.539	86.1381	87.582	83.8875	93.2471	84.1235	81.9365
ENSRNOG00000003549	Cnpy2	97.8064	100.105	97.7605	95.8702	94.346	93.0943	86.7051	81.961	78.0257
ENSRNOG00000019147	Stom	142.279	136.862	135.965	55.6528	57.761	59.849	76.5744	83.0593	77.5587
ENSRNOG00000002280	Sh3bgrl	115.574	109.201	117.992	80.3306	85.8676	85.2997	75.5786	78.2387	76.5901
ENSRNOG00000010524	Cryab	26.4017	25.4883	26.9777	104.544	107.341	113.955	143.709	139.137	136.578
ENSRNOG00000006197	Calu	105.677	105.98	104.118	103.601	105.231	103.016	62.3457	66.3999	67.5469
ENSRNOG00000053725	Usf2	95.2325	97.5064	100.729	87.5642	81.6679	82.03	95.5192	91.2373	91.1414
ENSRNOG00000007769	2019-03-02	83.4645	82.469	84.1213	96.5414	93.5843	92.8781	99.4699	94.3642	94.5204
ENSRNOG00000001719	Psmd2	101.853	101.936	100.011	82.9938	81.3621	80.1162	90.052	92.3599	89.9602
ENSRNOG00000013360	Prkcsh	94.6591	94.9064	96.9359	97.8026	87.8735	97.1346	84.1172	84.2616	82.123
ENSRNOG00000010727	Ube2r2	91.677	92.1233	91.6682	88.1452	92.0525	90.0313	96.1047	86.5633	90.04
ENSRNOG00000010038	Psmc5	88.4745	87.1248	90.4929	88.1614	90.7391	94.0445	92.0858	94.5374	91.6999
ENSRNOG00000011559	Cnn3	89.528	90.6685	86.979	103.702	111.127	107.025	76.0736	76.0524	75.3757
ENSRNOG00000005614	Txn2	84.1675	87.7852	85.7208	93.7078	90.1852	91.0797	97.4399	90.6314	94.8631
ENSRNOG00000025040	Gng10	91.723	100.064	92.5034	93.804	96.0062	101.901	79.5143	78.7782	80.9615
ENSRNOG00000000569	Vsir	142.457	133.091	134.243	64.5518	63.1057	66.8098	69.2062	70.0351	69.9355
ENSRNOG00000021062	Fxyd5	127.758	121.469	118.708	83.0326	75.358	80.3576	74.093	67.0741	65.5501
ENSRNOG00000018117	Ndufv1	90.9626	92.4265	88.9379	85.3187	81.2407	83.7072	102.868	93.1524	94.582
ENSRNOG00000056457	Gpd1	52.5066	51.8073	52.6617	64.1762	61.8434	64.5745	160.48	153.032	151.283
ENSRNOG00000001316	Anapc5	89.098	87.6212	87.5486	93.5829	88.1366	89.8841	94.2386	90.6274	90.7509
ENSRNOG00000022980	Sdhd	82.4641	88.0216	84.8554	83.8591	82.2761	85.511	100.156	99.2514	104.435
ENSRNOG00000000841	Ddx39b	84.5153	83.8862	85.5461	94.7531	91.342	92.7261	95.8149	90.7007	90.4174
ENSRNOG00000055652	SNORD44	93.9396	112.984	78.6213	91.2929	76.2472	65.8443	92.4515	101.796	96.461
novel.1136	-	83.2606	80.7902	83.6727	99.0696	93.5088	98.7989	90.3749	89.6173	90.3893
ENSRNOG00000013179	Tinagl1	81.5016	77.5284	78.8377	89.243	85.4632	86.4119	107.518	101.816	99.6313
ENSRNOG00000016611	Hras	97.0337	93.8027	93.8436	75.7392	79.2865	80.0259	100.069	95.8714	91.9589
ENSRNOG00000020652	Tgfb1	119.128	112.5	118.098	78.787	77.3327	78.0877	75.106	72.9639	73.2854
ENSRNOG00000055990	SNORD78	97.6759	95.4998	102.759	82.7696	85.2206	80.8746	95.2384	84.6761	80.5256
ENSRNOG00000018091	Gdi2	99.4322	104.179	96.9985	87.3922	95.4731	90.0548	73.4518	78.2086	79.9409
ENSRNOG00000013331	Sdha	73.9254	77.3777	82.5474	82.0825	84.4606	83.8338	104.462	107.522	106.596
ENSRNOG00000000852	Prrc2a	97.3524	90.3825	97.4518	83.2934	79.8191	81.3924	92.6981	92.8978	86.7743
ENSRNOG00000004303	Timp3	84.0042	87.0116	86.1893	80.3441	78.6483	80.6034	102.804	98.8856	102.615
ENSRNOG00000015914	U2af2	101.727	101.185	101.407	79.4619	77.1879	77.1641	94.9093	82.8209	85.0471
ENSRNOG00000002934	Atp1b1	161.18	166.371	158.368	39.6781	38.288	38.3471	67.1689	65.5413	65.8886
ENSRNOG00000013783	Efhd2	124.95	120.105	121.58	72.0667	71.7932	70.6071	75.5853	72.0168	71.8433
ENSRNOG00000020956	Bcat2	53.9433	48.7982	50.5773	75.737	71.8964	73.9048	147.23	140.551	137.616
ENSRNOG00000011054	Laptm5	133.704	132.175	130.504	65.2448	63.6493	64.1799	69.738	70.4792	69.5405
ENSRNOG00000028498	Wdr1	103.783	101.026	101.187	90.7031	85.4669	87.4605	74.8367	77.7635	76.7109
ENSRNOG00000019048	Sod2	104.604	107.962	103.65	83.6558	77.8859	81.4121	80.586	78.3141	79.31
ENSRNOG00000000815	Smpdl3a	126.361	132.754	124.343	62.1144	60.3343	61.3306	73.2502	75.7111	80.5522
ENSRNOG00000020673	Pbxip1	78.3333	72.1683	78.5089	102.028	90.646	96.4454	96.9019	90.3477	90.7116
ENSRNOG00000016751	Slc25a28	67.7927	62.1855	68.4757	113.56	115.583	113.542	87.2029	82.7869	81.6662
ENSRNOG00000018220	Pde4dip	31.2795	29.6005	32.2841	99.4441	94.2964	102.055	128.953	138.304	136.46
ENSRNOG00000011667	Fastk	77.825	74.7588	78.1598	96.2179	89.2409	93.873	95.6572	97.2889	88.9183
ENSRNOG00000012640	Dpp7	89.3309	89.3443	89.6132	96.6795	96.3649	98.0724	79.418	75.4883	76.1746
ENSRNOG00000016619	Use1	69.3448	73.2905	69.8017	98.8274	99.9894	100.833	97.5671	88.7786	92.0084
ENSRNOG00000001070	Cdk2ap1	80.0422	92.1073	89.7744	92.0574	89.5932	87.2047	86.872	90.9381	80.6616
ENSRNOG00000019497	Mrpl17	88.8659	92.1712	90.514	85.9367	88.8454	93.7712	86.5785	81.5667	80.3395
ENSRNOG00000008465	Tmem176b	110.928	110.813	107.508	75.7579	76.1587	76.3685	77.8383	77.3807	75.2531
ENSRNOG00000009592	Cyb5r3	77.4595	76.1726	77.971	84.9523	90.2399	86.2384	93.7003	99.103	100.164
ENSRNOG00000016071	P3h3	91.5953	83.5283	88.1507	102.877	105.199	105.384	72.2125	68.3879	68.342
ENSRNOG00000017158	Eif4g2	92.3626	94.2408	95.5271	85.616	86.252	87.8446	75.0803	82.9671	85.0398
ENSRNOG00000011648	Aqp1	115.033	108.103	111.537	80.4331	77.5242	78.1979	71.0817	69.4733	71.4407
ENSRNOG00000014908	Sf3b5	90.4508	88.7733	89.0624	86.7063	87.428	85.1369	89.5204	83.2489	80.976
ENSRNOG00000033611	Wdr83os	90.8437	94.9663	91.3484	91.4137	82.728	84.5121	83.9946	82.6746	78.1491
ENSRNOG00000052981	AABR07058464.1	53.4916	52.8881	52.5428	140.063	125.467	145.129	70.2032	66.8786	73.407
ENSRNOG00000010252	Hexa	90.9019	92.2801	92.7144	94.9798	89.1995	91.303	78.2941	75.1097	74.629
ENSRNOG00000060293	Ndufa3	61.5783	76.621	67.575	98.5793	88.7656	89.8045	98.1215	98.7887	99.3753
ENSRNOG00000047706	RT1-CE16	154.99	151.188	154.094	74.8555	73.103	68.6208	36.5202	33.746	31.1122
ENSRNOG00000027514	Ube2m	83.7933	89.2448	87.5091	86.7016	89.5127	83.5941	87.5642	86.761	83.4469
ENSRNOG00000019838	Gmfg	105.083	102.229	100.219	86.2433	80.5035	78.2944	74.1826	77.1593	73.8988
ENSRNOG00000020005	Map2k2	83.1608	85.7029	82.8976	88.0391	82.8607	90.5733	90.8054	90.0794	83.6348
ENSRNOG00000015205	Cyb5a	91.8587	95.9782	97.4035	71.3522	81.2677	78.2866	90.076	86.4825	83.5798
ENSRNOG00000020354	Mrpl23	85.6171	81.9235	85.7628	89.5733	83.7275	90.6258	91.1638	82.8989	84.2723
ENSRNOG00000030118	Msn	109.82	109.997	108.31	81.2263	79.864	80.4107	65.5164	69.0665	70.6588
ENSRNOG00000001172	Rnf10	80.2372	79.265	81.9166	83.7206	81.0839	81.6062	96.0699	100.097	90.8659
ENSRNOG00000012881	Fgl2	54.3586	54.7993	52.5044	90.2749	98.0847	93.8832	104.517	111.707	114.705
ENSRNOG00000027357	Sox17	68.6167	57.2603	61.4394	88.8812	79.0541	86.2938	120.824	112.465	98.5977
ENSRNOG00000011282	Ppp2r1a	87.0809	84.8597	87.2114	81.7126	80.6539	84.1522	88.0641	87.9011	91.305
ENSRNOG00000008182	Htra3	61.4878	58.8098	60.8918	114.529	105.638	108.535	90.8143	86.8508	84.7534
ENSRNOG00000013469	Txndc5	98.5706	97.8925	98.5694	96.0331	95.1395	94.6638	64.8888	62.8283	63.1916
ENSRNOG00000023520	Cs	81.3748	80.6915	81.4936	78.918	73.253	77.0152	97.4904	99.3352	100.702
ENSRNOG00000016299	Klf4	99.5474	89.3555	92.1776	91.0996	92.8726	88.2748	73.5929	70.7185	69.9354
ENSRNOG00000017309	Rsrp1	81.5036	82.5995	79.6155	84.1723	85.4946	87.1666	95.0212	87.3042	83.9331
ENSRNOG00000016161	Lman2	95.5346	91.886	89.6162	80.9714	76.305	81.3674	84.7991	82.788	83.3821
ENSRNOG00000049497	Eif6	91.027	92.5126	96.612	83.4234	80.5976	82.4423	81.9291	77.6769	79.6388
ENSRNOG00000058186	Errfi1	95.0974	91.4038	91.0021	87.9023	90.1977	89.8074	73.3921	71.9273	73.6311
ENSRNOG00000010984	Anxa11	74.7189	74.1128	75.6802	82.0144	80.0617	79.9133	106.08	96.6547	95.0836
ENSRNOG00000007784	Bloc1s1	67.6126	68.7958	69.3059	91.1692	80.8274	90.9422	101.303	97.5526	96.8102
ENSRNOG00000028448	Elovl1	67.2015	63.216	64.2811	71.5161	64.419	69.6917	122.137	120.697	121.094
ENSRNOG00000004959	Actr2	108.126	110.158	108.635	76.3159	74.2579	76.8047	67.4339	67.3352	74.1908
ENSRNOG00000013545	Polr2e	78.3225	80.8396	79.1392	85.797	81.6629	83.8411	92.7268	87.979	92.3495
ENSRNOG00000000954	Polr1d	86.7088	92.9481	83.7816	88.097	85.507	87.9514	80.3263	74.3367	82.9171
ENSRNOG00000002270	Hnrnpdl	81.421	79.7783	81.8768	75.3012	85.083	80.9238	95.149	91.7712	90.2097
ENSRNOG00000042503	Ndufv2	74.3465	74.014	73.0193	84.3578	81.4581	80.4323	98.7897	98.0426	96.8268
ENSRNOG00000009845	Acadm	52.714	53.9598	53.0819	81.4698	82.5496	78.3666	118.663	116.746	123.163
ENSRNOG00000015036	Ctgf	81.3485	76.6956	77.1307	85.9306	86.2087	88.5684	88.2911	89.0681	86.8039
ENSRNOG00000021338	Tmem132a	98.736	85.9664	95.4373	83.3125	81.6232	85.6215	78.8209	79.0045	70.977
ENSRNOG00000046227	Tprg1l	92.4349	94.9192	92.5872	81.7188	81.5111	82.3904	80.8637	78.421	74.3703
ENSRNOG00000051650	Ywhaq	92.2313	97.2138	95.7559	77.4201	80.1573	78.8325	76.1253	78.2349	82.2903
ENSRNOG00000014625	Atp5d	84.1406	84.4214	84.403	82.4994	73.5853	82.635	92.5213	88.7017	84.5994
novel.887	-	91.2166	84.1605	90.4542	92.8431	87.7175	92.2401	73.9998	74.2037	69.8374
ENSRNOG00000024705	Rarres2	105.647	98.8724	106.461	105.057	87.1858	94.8627	57.5322	46.7925	53.1217
ENSRNOG00000016133	Sumo1	75.6784	78.3307	76.1377	90.866	96.5825	88.2706	80.2219	82.2987	87.124
ENSRNOG00000021174	Macrod1	36.3212	36.4875	37.4709	76.981	72.707	78.1331	144.057	139.344	133.255
ENSRNOG00000021395	LOC100363452	76.1202	79.5372	78.8787	88.965	85.9834	82.5609	89.9677	86.8873	84.919
ENSRNOG00000054352	Atp6ap1	109.78	109.898	110.301	70.1059	66.7007	67.3144	75.1181	74.4391	69.8757
ENSRNOG00000000304	Cd164	89.8364	93.6067	89.6894	83.7259	87.0323	83.907	72.5219	76.6229	76.4789
ENSRNOG00000029360	Serinc1	81.8218	82.9345	80.4686	93.2496	79.2942	80.7067	81.2517	86.6233	85.1159
ENSRNOG00000018939	Rexo2	105.311	103.358	100.741	78.4892	77.0016	75.0682	69.2249	70.7289	71.1391
ENSRNOG00000014350	Cyr61	115.99	114.695	117.788	83.1908	78.2613	81.0844	51.9942	55.7394	51.8295
ENSRNOG00000002292	Hnrnpd	79.4814	90.2307	84.1775	82.3319	87.1362	81.5425	81.4139	79.7283	84.2423
ENSRNOG00000006949	C1qbp	85.0242	91.6683	88.9021	76.8204	84.2111	79.5164	81.6807	78.1785	84.0252
ENSRNOG00000058329	Prrx2	103.859	94.4807	102.019	99.979	94.8094	93.4221	57.0695	54.7484	49.3089
ENSRNOG00000016166	Pdlim1	93.9353	92.8246	91.1566	84.6931	84.5611	88.704	74.7194	68.5774	70.1305
ENSRNOG00000011463	Psmb2	78.3028	79.497	81.9811	80.9352	85.1001	83.3384	87.0545	86.7195	86.3701
ENSRNOG00000008277	Bag1	75.0242	74.894	73.1836	86.0429	84.5967	88.364	89.8694	87.1792	88.6289
ENSRNOG00000013505	Vdac2	78.1407	87.7016	80.7046	83.9562	83.9139	83.4897	79.056	84.7962	85.7175
ENSRNOG00000016723	Phpt1	78.6534	76.6247	82.3919	87.114	85.5097	84.8909	90.7544	79.92	81.2299
ENSRNOG00000030344	Krt31	238.031	231.32	254.824	5.83618	6.38562	5.81548	0.990883	1.63231	1.63892
ENSRNOG00000010732	Sap18	76.1846	87.6223	81.1219	85.949	82.8692	78.2635	83.203	85.0851	85.7773
ENSRNOG00000032609	AY172581.18	71.4481	88.3596	64.5912	103.127	122.436	92.4853	70.9838	54.8826	77.1104
ENSRNOG00000019981	Sdf4	86.9186	81.4458	82.9849	91.5211	92.168	94.6554	68.9859	73.6808	72.9557
ENSRNOG00000025731	Ptma	98.526	97.0494	98.0884	63.9765	68.6973	63.6117	87.0441	79.8859	87.5952
ENSRNOG00000004132	Lasp1	108.591	105.809	110.372	74.7882	74.7322	76.4713	65.1419	63.3558	64.4997
ENSRNOG00000007393	Ndrg1	106.115	107.184	107.259	61.2754	62.7066	60.4033	81.6237	76.8755	80.3136
ENSRNOG00000024539	Ndufb6	88.928	94.4937	92.959	73.1891	70.5908	70.8291	90.0324	82.2978	79.7415
ENSRNOG00000014610	Anpep	104.786	100.084	100.547	85.0022	82.7877	85.9495	61.8266	61.4933	60.169
ENSRNOG00000049683	Sh3gl1	86.4325	85.5188	86.6461	85.5057	83.2181	88.5038	82.6132	71.8258	72.2342
ENSRNOG00000037113	Slfn2	92.3842	94.4431	89.4235	85.1822	86.8613	90.487	69.3538	66.2945	66.7871
ENSRNOG00000014480	Sys1	74.0627	66.8796	76.6776	85.8768	77.955	81.8355	101.291	90.3782	85.7502
ENSRNOG00000009980	Plpp1	62.4648	70.2238	69.1626	96.3521	94.2494	97.6966	85.5056	82.3192	82.1803
ENSRNOG00000006961	Snrpb	90.8174	91.0086	88.7173	74.8792	71.5871	70.5171	88.7435	83.7408	79.827
ENSRNOG00000012172	Spi1	132.835	120.731	125.076	54.9406	53.5628	57.284	70.5655	62.3869	61.2709
ENSRNOG00000053452	Actg1	118.622	109.88	108.864	68.1583	64.0965	67.444	66.1308	67.3786	67.1226
ENSRNOG00000011853	Mbd2	93.0817	97.828	98.8483	71.5184	81.2894	75.0257	71.5034	77.334	71.0915
ENSRNOG00000006331	Elovl5	67.5945	67.7637	66.6536	71.5805	77.0575	72.0447	101.953	103.544	108.359
novel.208	-	86.1884	83.8935	80.923	84.6802	88.1987	90.9271	74.6105	74.7454	72.3076
ENSRNOG00000010747	Dap	97.901	97.7824	99.9316	80.6387	79.9847	81.5485	66.093	65.1081	66.6901
ENSRNOG00000025209	Plxnd1	113.617	104.671	111.233	72.9571	69.4787	71.9799	63.5853	64.7172	62.6094
ENSRNOG00000034198	Tceal9	76.5594	79.5498	72.0195	91.0998	103.093	88.2725	74.5188	72.2212	77.1514
ENSRNOG00000018570	C1qtnf3	102.899	109.13	108.947	100.052	101.038	103.055	35.6449	35.9285	37.5419
ENSRNOG00000018159	Anxa4	104.368	104.917	100.942	67.6423	72.2705	71.7476	70.6746	70.822	70.8146
ENSRNOG00000014568	Ndufb10	67.5008	79.6918	74.8993	82.2343	77.5206	79.8534	92.8054	89.3458	90.3197
ENSRNOG00000014633	Vps28	75.7813	77.1149	73.5328	86.6938	83.0886	82.5457	89.8314	81.8737	83.5884
ENSRNOG00000008215	Trim47	95.3058	86.0548	93.5808	77.7455	69.1161	74.1758	88.8394	80.0275	69.0632
ENSRNOG00000014641	Rpl3l	26.3466	29.4751	31.9719	81.3468	75.9642	74.2315	139.776	136.37	137.778
ENSRNOG00000033835	Dnm1	96.0576	85.975	93.6461	83.9404	81.9603	85.906	73.9686	67.7973	63.6212
ENSRNOG00000027722	H1fx	90.0845	85.2566	89.4404	68.9754	61.2746	71.1039	94.459	86.2848	84.8246
ENSRNOG00000015380	Jup	91.5601	85.3612	90.5913	68.5656	61.878	65.3348	93.4895	89.6854	85.2009
ENSRNOG00000012026	Psmc2	73.0925	76.8278	72.5862	80.2981	79.8023	83.594	91.3517	86.6068	86.2493
ENSRNOG00000030729	C4b	38.4678	36.1393	38.8677	129.874	119.191	119.593	86.2561	81.2415	80.2954
ENSRNOG00000016050	Fgfr1	84.6005	78.1653	85.4799	94.6963	92.6533	94.9531	70.6884	64.9958	63.6388
ENSRNOG00000024818	Eva1b	89.6042	82.2064	85.5519	91.9896	86.5217	95.0001	72.327	63.8412	61.9043
ENSRNOG00000057367	Glud1	87.035	86.8289	86.3769	78.2141	81.2084	78.7477	75.752	76.239	77.427
ENSRNOG00000030351	Hmgb1-ps4	93.1106	94.3955	88.7507	65.867	66.9154	67.0992	88.6156	80.2835	82.1098
ENSRNOG00000000990	Pdap1	80.5637	87.1658	85.1703	84.1189	82.6148	85.2603	71.9385	75.5802	74.2846
ENSRNOG00000021750	Id1	58.32	58.2915	57.5961	86.5309	82.0267	82.252	110.806	98.7593	92.0323
ENSRNOG00000010452	LOC100363502	76.2957	81.2417	81.5868	80.4392	82.0699	84.4258	77.3968	79.4544	83.3584
ENSRNOG00000003864	Gipc1	96.8759	96.4647	98.1366	73.0722	71.988	72.034	79.0967	67.616	70.3044
ENSRNOG00000047768	Lamb2	71.4723	68.8472	70.7855	88.5864	84.5506	87.9588	87.4211	82.3231	83.3435
ENSRNOG00000021802	Isg15	34.3427	36.5811	34.2864	159.03	144.096	160.316	54.7216	50.1784	50.5944
ENSRNOG00000007726	Mcam	77.23	78.8936	77.7798	90.4348	89.479	89.4951	75.278	71.6183	73.639
ENSRNOG00000003399	Hnrnph1	71.2329	75.0632	71.9671	82.9043	86.7126	81.219	83.7814	79.9467	90.6005
ENSRNOG00000025768	Clk1	60.272	59.7033	59.8852	92.8892	101.976	96.6709	85.005	82.544	84.4463
ENSRNOG00000013526	Rassf4	151.643	144.848	147.74	34.4124	33.6333	33.392	57.6492	58.6039	61.4208
ENSRNOG00000002461	Nid1	86.107	84.9435	84.1788	99.6058	100.639	101.691	54.5086	55.4404	56.2037
ENSRNOG00000023708	Tmem176a	93.8774	90.2686	90.2931	81.274	71.8594	77.4625	74.3562	75.1108	67.9714
ENSRNOG00000057078	Ddit4	53.7217	51.5773	53.851	84.5506	75.7153	81.3932	110.455	106.534	104.285
ENSRNOG00000025570	Os9	89.2087	87.1525	87.6638	81.7091	80.8011	81.9313	73.1251	69.6169	68.633
ENSRNOG00000001959	Mx1	26.4791	28.6625	25.5442	156.791	157.842	164.54	53.9251	51.308	54.4237
ENSRNOG00000007356	Chmp3	86.9269	78.8472	81.2412	82.9176	82.6114	74.5319	73.1504	78.2612	80.2607
ENSRNOG00000049829	AABR07060872.1	68.9307	74.1165	71.3111	108.003	112.436	100.774	63.3322	55.7495	63.8315
ENSRNOG00000059406	Ier5	117.733	102.538	115.649	67.4991	64.4391	69.304	62.2239	60.9797	57.2649
ENSRNOG00000001351	Trafd1	66.7837	63.8629	63.5644	106.917	96.3794	104.038	72.0705	71.6195	71.1881
ENSRNOG00000010170	Tubb4b	81.8809	79.2572	83.445	69.8141	66.7902	68.9889	88.849	86.6126	90.1513
ENSRNOG00000000340	RGD1304704	81.7984	68.933	68.8515	79.0813	78.8912	91.9343	78.9935	84.8923	80.4473
ENSRNOG00000001062	Kmt5a	94.0807	91.9767	100.986	70.2779	68.6494	66.8654	75.2957	73.8112	71.5462
ENSRNOG00000042421	RGD1559909	87.6614	82.924	86.0754	86.1943	77.7579	79.5377	71.7717	73.4909	67.547
ENSRNOG00000019264	Ltbr	87.1787	83.7748	86.5911	80.0026	76.1844	79.4386	75.7318	74.4877	68.6976
ENSRNOG00000003815	Slc25a11	69.5411	65.2021	70.1165	73.9528	71.0643	74.4786	97.8762	94.8952	94.0009
ENSRNOG00000017833	Actn2	30.9405	30.8181	32.095	119.52	110.634	120.445	82.8311	91.8224	91.8139
ENSRNOG00000020871	Ltbp4	90.8323	82.4999	90.035	70.8118	71.6302	72.7883	81.1406	77.5166	73.6591
ENSRNOG00000043388	Irf3	72.4227	71.063	69.5451	81.5386	80.6366	81.3958	83.48	86.1225	84.0607
ENSRNOG00000000164	Lamp2	90.2025	95.6597	92.8383	78.0525	81.7581	75.1438	60.561	67.6956	66.9008
ENSRNOG00000017447	Eif2s2	80.7835	81.3352	81.5498	75.0061	82.3303	76.5827	74.5581	75.4251	80.6429
ENSRNOG00000017905	Map1lc3b	66.1789	67.9985	64.7404	81.0541	88.648	87.0855	86.1703	80.4729	85.5178
ENSRNOG00000057569	Ahnak	81.3133	80.6893	79.6666	77.0453	77.6055	76.7871	73.4832	79.4229	81.3665
ENSRNOG00000027360	Srsf7	85.7491	86.2578	79.7403	69.4878	75.6432	72.9624	75.6813	79.9763	81.7665
ENSRNOG00000016367	Vasp	93.1925	86.5974	92.3783	77.6413	75.0373	75.9606	70.8792	66.8509	65.2755
ENSRNOG00000019552	Lsm7	79.5284	79.1857	79.6139	79.99	74.474	74.7246	80.6543	76.6943	78.3746
ENSRNOG00000011745	Psma1	74.7129	79.629	74.8933	73.4113	74.7202	76.4371	82.5135	82.7527	83.8302
ENSRNOG00000026963	Hsp90b1	99.6019	103.801	99.1156	71.5956	77.9158	71.6063	58.69	60.8325	59.3788
ENSRNOG00000012722	Ppdpf	74.9835	82.2012	73.9129	68.5461	71.782	76.6307	87.7618	81.9391	84.7676
ENSRNOG00000018457	Ptpa	81.111	80.3684	82.3399	74.8272	71.9774	76.2436	80.532	78.7684	76.1836
ENSRNOG00000019811	LOC100362432	75.5952	72.6691	76.2763	76.2284	76.9936	80.3301	84.6465	80.0574	79.0301
ENSRNOG00000004629	Fkbp3	50.1156	56.4706	54.0031	81.0994	95.7508	84.6472	91.6623	94.8944	92.5025
ENSRNOG00000050563	Sub1	70.5437	85.0091	75.9972	76.8894	84.6288	79.9022	76.8505	77.2837	73.9407
ENSRNOG00000013516	Sf3b1	72.8461	74.6734	72.4695	84.0303	88.9727	85.8979	70.4492	74.7396	76.0257
ENSRNOG00000039336	Hrct1	48.6858	56.1538	51.1599	88.7252	90.8111	87.7519	97.5426	92.1501	87.0703
ENSRNOG00000018075	Spcs1	79.4639	81.2989	76.5914	76.7702	79.7653	80.721	78.5281	71.9811	74.6999
ENSRNOG00000013961	Ghitm	66.9325	70.4856	68.3886	83.5548	81.684	81.5208	86.1232	79.5717	80.6931
ENSRNOG00000049219	Rnf187	84.5044	76.1329	82.9251	77.7462	72.186	74.7037	78.8447	76.2726	75.5076
ENSRNOG00000001269	Ppp1cc	80.1587	83.9168	82.9491	75.4244	78.356	76.2646	71.5421	72.2281	77.2543
ENSRNOG00000032885	Cycs	83.3419	81.1352	75.4072	76.8867	73.4703	68.3045	77.7727	78.4629	83.2659
ENSRNOG00000001415	Ap1s1	85.9024	90.3319	84.9562	75.8853	73.1962	73.8073	74.3931	70.8574	66.8008
ENSRNOG00000002520	Litaf	111.497	111.627	104.874	57.6343	59.1329	58.3036	63.1813	65.279	64.097
ENSRNOG00000000047	Cd82	91.344	87.1229	89.4463	72.5813	72.0102	71.1268	73.7074	68.0215	69.7894
ENSRNOG00000043225	Zfp771	86.9595	75.5163	84.8013	79.9444	65.1936	74.5643	80.8516	77.2203	69.8856
ENSRNOG00000049105	AC095947.2	79.0089	76.971	83.9686	89.1019	82.9262	76.8068	86.1596	69.2462	50.6161
ENSRNOG00000017962	Serpinb6	70.4192	74.6031	70.3523	77.8476	80.6631	82.6959	79.2691	79.7664	78.994
ENSRNOG00000007081	Xdh	57.9429	58.1633	58.181	97.4535	97.5324	97.7413	75.099	76.8898	75.3794
ENSRNOG00000003018	Olfml2b	98.6979	97.2654	98.0971	87.2678	84.692	86.3151	47.9633	47.4822	46.5254
ENSRNOG00000060949	Anxa8	63.5644	61.6242	63.7122	73.2453	77.1283	74.4101	91.087	93.3822	95.3234
ENSRNOG00000018994	Psmc4	79.3631	73.29	77.7419	75.7188	73.5855	75.1892	81.0493	79.3178	78.0942
ENSRNOG00000018677	Akt2	64.789	62.8256	65.9016	75.0642	76.8165	76.2897	89.1837	89.7122	91.8198
ENSRNOG00000011483	S100a9	147.624	169.356	164.139	49.2198	52.0338	54.8506	19.9155	17.8547	17.3454
ENSRNOG00000004505	Nfic	68.0715	61.9176	67.0159	72.7943	74.1256	79.6277	87.9864	92.305	85.6269
ENSRNOG00000013190	Rnaset2	104.298	108.915	104.245	66.8667	58.9657	63.6861	61.0752	58.785	62.3491
ENSRNOG00000021042	Psmd4	74.9498	74.598	71.8715	78.9886	73.6121	76.7511	79.6659	79.7708	78.9524
ENSRNOG00000019077	Lipa	142.807	148.91	144.391	29.945	30.1641	32.5672	51.2421	52.3235	56.5721
ENSRNOG00000000557	Ppa1	78.1219	81.3693	77.2337	82.3184	83.0149	82.3324	66.3682	67.316	70.6638
ENSRNOG00000050794	Pdlim4	92.028	90.1128	93.9209	74.5943	65.2575	72.8917	66.7377	65.6671	64.8841
ENSRNOG00000001436	Ywhag	80.4898	84.628	81.5639	76.119	75.3407	73.4696	68.7649	73.1171	72.1033
ENSRNOG00000005988	Arl8a	86.1745	88.3078	86.5851	75.7492	73.884	75.6663	67.2111	66.041	65.9666
ENSRNOG00000013766	Acaa2	54.6841	54.6756	59.8034	71.8553	69.6862	70.465	100.181	102.471	101.489
ENSRNOG00000010103	Eif4b	65.6765	68.1527	67.0373	77.8599	80.8268	78.6553	82.4142	82.6426	81.8874
ENSRNOG00000003256	Ccng1	56.0905	57.5606	59.8999	71.3926	74.1858	73.7826	91.6998	99.2027	101.117
ENSRNOG00000016678	Angptl2	88.2313	86.324	90.8285	85.2529	77.8307	83.087	56.2871	57.4327	59.3882
ENSRNOG00000046799	Phb	74.7781	69.0685	74.044	69.6585	70.2853	70.8702	88.9454	84.1404	81.9437
ENSRNOG00000010800	Hadhb	48.7961	55.7901	50.6827	67.229	72.6931	68.8635	107.745	104.957	106.531
ENSRNOG00000046996	Pea15	87.2752	85.9307	85.4067	70.969	75.9124	73.424	67.2357	67.4027	69.0163
ENSRNOG00000017306	AABR07071876.1	65.1173	65.4516	66.7807	85.8977	68.6469	78.2281	98.6831	81.3273	72.2066
ENSRNOG00000011955	AABR07026997.1	55.1137	67.785	80.739	96.3887	85.2776	87.7748	70.6645	73.9586	64.0954
ENSRNOG00000031312	Tnfrsf1a	82.8294	79.5347	82.2812	80.2753	78.389	76.8484	70.1587	67.3127	64.0477
ENSRNOG00000020474	Pin1	77.6479	75.5912	74.4195	80.9027	68.9915	75.6451	76.1465	73.4775	78.2326
ENSRNOG00000045670	Tnfsf12	94.4158	87.2489	92.6346	61.2786	65.1238	68.8614	76.3917	69.7742	65.3167
ENSRNOG00000019940	Ssr2	79.2439	84.3433	82.3071	82.0391	83.3583	80.8382	66.4322	62.399	60.0347
ENSRNOG00000007668	Mafa	34.1776	32.545	36.1764	74.0855	68.5242	80.879	123.657	123.817	107.052
ENSRNOG00000001253	Eif3b	84.0122	79.9747	80.0752	71.0792	71.239	70.3926	73.5573	74.32	73.4629
ENSRNOG00000037087	LOC108351584	52.7473	57.4285	58.1668	79.2701	75.5989	79.9361	94.3292	96.3102	84.1901
ENSRNOG00000052357	Fosl2	105.028	110.687	112.123	63.5872	57.1354	65.7057	52.5075	54.9332	55.3613
ENSRNOG00000031315	LOC108348287	52.1344	63.8611	57.3473	81.4553	98.2243	81.1664	78.6929	83.0054	80.5659
ENSRNOG00000017220	Tcirg1	103.733	99.5909	101.047	65.9086	58.1298	61.7385	65.2352	61.1382	59.4257
ENSRNOG00000013167	Hmgb2l1	85.9751	93.9843	92.6396	55.2007	55.5846	56.5647	80.5707	78.2568	76.6573
ENSRNOG00000012786	Pgrmc1	70.5026	73.235	70.8059	68.5465	70.2193	66.0181	82.9736	83.3029	89.3135
ENSRNOG00000019302	Stx4	66.4095	69.1223	64.2429	76.8782	81.1935	76.104	79.0703	79.5862	80.9846
ENSRNOG00000013578	Trem2	140.196	134.665	128.917	43.5021	36.1795	38.8258	51.9415	51.1325	47.9858
ENSRNOG00000021960	AC109958.1	69.7784	74.1994	73.7002	78.082	77.6567	80.7976	72.8039	71.9505	73.5616
ENSRNOG00000011196	Krt25	163.947	167.106	144.945	17.8951	18.4131	17.1209	49.7323	44.2703	48.5838
ENSRNOG00000008452	Eid1	70.7961	71.5439	68.8629	78.106	81.8467	81.2703	70.3576	73.4187	74.6551
ENSRNOG00000012738	Eif3m	65.1173	69.291	68.8053	80.3106	78.8961	78.3577	74.9352	76.5279	77.7726
ENSRNOG00000024142	Arglu1	63.0705	71.2157	67.1102	84.6799	85.2788	76.5661	74.4744	75.41	72.0351
ENSRNOG00000019725	Actr1a	78.4608	79.9824	77.5234	74.2937	72.5528	73.7819	70.4857	71.0989	70.5529
ENSRNOG00000002642	Ptges3	75.7935	82.4832	75.2785	70.0444	70.545	67.6298	72.9446	73.0559	80.9468
ENSRNOG00000009565	Pdk4	8.73474	11.0473	9.51622	48.4513	47.1372	49.9594	159.542	165.297	167.457
ENSRNOG00000007738	Hm13	78.2201	76.8004	83.8361	81.7014	74.4082	73.6191	66.7559	65.1499	66.4967
ENSRNOG00000005958	Rrbp1	85.6094	87.4636	86.5298	83.0092	79.4899	81.3336	55.8381	54.3828	53.3079
ENSRNOG00000002693	Nme1	93.8715	103.406	96.1628	59.0179	58.0503	61.3218	63.614	64.7342	66.4078
ENSRNOG00000012616	Ppt1	111.892	107.211	107.576	55.4438	55.5211	56.6532	56.9525	58.7034	56.104
ENSRNOG00000028103	Psmd3	70.3036	73.146	74.4814	66.9445	67.1558	72.147	82.194	78.3526	79.5444
ENSRNOG00000014051	Pgrmc2	63.3352	67.9342	64.3791	70.3384	73.7379	66.6756	86.912	86.6381	83.9446
ENSRNOG00000021088	Tmod4	32.0614	31.3596	31.7789	71.0886	68.3601	72.7199	118.046	117.992	120.236
ENSRNOG00000003833	Nenf	63.4246	74.1284	65.1838	79.1498	81.1235	85.5762	70.3326	72.3329	71.1789
ENSRNOG00000003223	Degs1	91.4451	86.6584	88.5263	58.8314	59.5395	59.5789	75.6697	69.1786	72.7144
ENSRNOG00000018671	Commd4	69.0974	75.1971	68.8304	79.0238	71.4234	76.8372	77.1693	72.5148	71.1313
ENSRNOG00000050404	Pmepa1	84.845	80.5208	86.2158	79.2512	85.9703	78.6831	58.2134	55.7693	51.6337
ENSRNOG00000011754	Myom2	39.6792	39.3405	41.6272	67.1745	61.4643	64.4654	114.392	116.116	116.765
ENSRNOG00000029500	Tapbp	70.0264	59.6513	69.0837	96.8387	89.7514	98.1917	61.031	60.8163	55.1613
ENSRNOG00000012415	Mpc1	67.1682	80.3751	75.6349	68.6078	69.0477	67.6511	69.1859	79.2469	83.5358
ENSRNOG00000018440	Arfip2	70.9169	63.0239	70.4259	82.0965	73.5934	84.2481	75.3356	70.8339	69.6809
ENSRNOG00000014779	Pdcd4	99.2095	105.364	98.785	49.8533	55.0968	54.1264	62.9325	67.3926	65.9075
ENSRNOG00000019934	Paip2	62.9115	66.7577	63.4972	74.0485	80.8447	77.0938	79.6824	76.8611	76.8746
ENSRNOG00000012008	S100a3	181.829	190.207	192.793	9.37605	11.7495	10.2433	22.3344	19.7788	20.113
ENSRNOG00000036833	Zfp385a	66.0439	63.0072	66.9823	72.6401	68.2893	73.602	86.1521	80.8982	80.1584
ENSRNOG00000004072	Myo1c	80.3783	77.0805	78.5016	76.4408	73.0661	73.2546	64.4197	67.0734	67.1525
ENSRNOG00000014654	LOC691807	67.8908	74.5057	77.6889	67.7693	73.5119	67.1375	80.3939	75.3721	73.0243
ENSRNOG00000004612	Ppp1cb	62.0472	65.1855	61.3528	69.544	75.3309	73.3599	80.9227	81.5228	87.4314
ENSRNOG00000001414	Serpine1	81.9121	82.1766	79.3314	80.1526	83.1275	84.0093	54.334	56.5613	54.8733
ENSRNOG00000027690	Eif3el1	61.0292	65.2021	58.4362	79.6345	86.3377	79.5101	75.1218	75.7317	75.0801
ENSRNOG00000023322	Ostc	80.7823	87.915	76.3669	82.9576	80.2561	78.2261	58.2464	55.4389	55.6449
ENSRNOG00000020525	Col5a3	98.7411	94.6863	98.3356	81.7461	74.886	79.0548	45.6508	41.7877	40.6938
ENSRNOG00000010007	Srsf4	72.0867	68.0429	70.6768	71.4374	70.0495	75.7139	77.9273	76.1637	73.4708
ENSRNOG00000018656	Ampd1	30.9596	34.5221	35.048	72.2772	69.9968	70.385	111.963	113.018	116.017
ENSRNOG00000056435	LOC102546764	73.4165	66.1253	61.0292	73.8356	69.4587	75.1281	77.751	76.6512	80.2507
ENSRNOG00000012956	Tgm2	71.4321	67.5928	70.6892	71.4016	69.5234	71.1332	78.3493	78.0424	75.1445
ENSRNOG00000020487	Coa3	75.745	82.9415	83.4861	62.2064	68.3696	66.664	76.6206	71.0514	65.1078
ENSRNOG00000046109	LOC689574	72.5813	76.2136	70.9099	79.4504	69.9009	68.3065	74.1474	71.2514	69.3345
ENSRNOG00000015941	Fkbp10	88.6608	86.8613	90.7507	85.7209	83.1823	86.4272	43.7631	43.0945	43.4509
ENSRNOG00000004726	Mapkapk2	73.5469	69.8435	68.2925	74.999	72.4095	76.0093	69.5593	73.234	73.1326
ENSRNOG00000053703	Rn50_7_1411.1	105.152	101.886	108.011	87.8054	74.914	71.6394	35.8998	33.0341	32.5138
ENSRNOG00000005763	Arl1	79.8947	79.2707	77.3142	75.084	74.3274	72.688	63.9158	65.6097	62.4482
ENSRNOG00000053583	Mapk3	74.8428	71.7725	75.2627	70.1003	70.2979	70.8903	73.2913	68.9707	74.6825
ENSRNOG00000055756	Bcap31	75.3647	75.5827	76.7189	66.285	63.719	65.1698	73.0769	77.5551	76.4931
ENSRNOG00000031479	Hdlbp	75.086	75.1864	76.4818	78.9835	79.0067	78.9481	62.4598	61.6049	61.755
ENSRNOG00000049097	Rpl7a	46.0227	37.6469	29.0782	113.717	44.2553	36.2259	40.783	270.44	31.3377
ENSRNOG00000002553	Smim14	77.4317	75.6725	78.1942	73.5019	78.2567	74.3517	65.2537	61.3571	64.4485
ENSRNOG00000019456	Kars	64.2356	67.7066	66.2648	76.2374	78.2199	77.8421	71.0318	70.9192	74.3468
ENSRNOG00000011891	Atp6v1b2	119.538	122.564	121.296	38.4248	38.3457	39.6511	55.5429	56.7834	54.3738
ENSRNOG00000009552	Serinc3	77.454	79.7147	74.2814	72.3905	74.2465	73.1941	64.4196	65.3806	65.0342
ENSRNOG00000020317	RGD1307752	81.9238	83.7061	79.8674	65.112	68.8369	71.0009	66.355	66.09	62.3077
ENSRNOG00000013201	Tex264	90.7081	81.3306	88.0903	60.9133	53.2757	57.4413	75.7363	69.52	67.9169
ENSRNOG00000003245	Cacng1	30.5081	30.4033	30.212	85.2989	81.4143	88.893	103.278	96.9461	97.6022
ENSRNOG00000009960	Puf60	72.0941	66.9862	67.2491	71.0452	66.8751	71.0121	78.5094	76.524	74.249
ENSRNOG00000019069	Nxf1	66.9687	68.7198	68.1995	71.6504	73.5193	75.6223	75.3692	70.996	73.0656
ENSRNOG00000056946	Scaf1	76.6904	67.3026	76.0992	67.6626	66.9707	68.3128	79.2573	72.6849	68.5784
ENSRNOG00000010945	Ywhab	72.3283	80.8622	75.4644	69.4544	72.3509	67.4209	66.7132	68.2191	70.4471
ENSRNOG00000046313	Basp1	87.8222	95.7157	97.3138	70.9062	71.2976	63.6669	53.1641	54.405	48.8934
ENSRNOG00000015630	Cct7	76.7472	74.2135	77.6536	71.2136	67.8748	67.1132	68.7645	69.4394	69.9572
ENSRNOG00000053362	Gabarapl1	80.4889	77.6335	77.7508	61.7819	61.5243	57.676	78.8496	73.7274	72.8113
ENSRNOG00000018289	Park7	58.7419	58.0748	60.0248	70.2569	71.1739	69.2135	89.2681	83.108	82.1345
ENSRNOG00000021264	Pcna	77.8039	79.6252	76.3819	56.6488	59.5838	58.1792	79.7618	74.6512	79.1967
ENSRNOG00000048848	Ccdc9	64.4147	64.7937	63.5734	73.7576	74.8431	74.1263	85.2656	68.5999	72.0277
ENSRNOG00000042960	Rgcc	55.8252	52.6186	56.227	71.5103	70.9147	69.891	93.0022	84.9932	86.2144
ENSRNOG00000009484	Ptcd3	129.886	132.894	128.508	29.4078	29.6079	29.0385	51.1664	54.8281	55.5252
ENSRNOG00000020813	Ltbp3	69.7907	66.664	69.8119	71.5858	68.7581	72.2711	76.4665	74.0972	69.9085
ENSRNOG00000001494	Napa	66.0917	60.8227	62.3429	66.6325	65.2366	68.7687	82.8242	83.7028	81.8765
ENSRNOG00000025481	Dctn2	71.2475	70.1208	69.042	76.6149	69.4698	70.5663	69.6524	71.5672	69.3671
ENSRNOG00000054563	Selenoh	66.7103	69.4447	67.7763	77.6089	75.5002	74.7478	69.4343	67.4128	67.1882
ENSRNOG00000001149	Pxn	57.3444	57.1051	58.4491	72.9114	70.5914	71.6605	83.1856	82.2381	80.84
ENSRNOG00000012329	Saraf	69.4699	68.0939	69.337	64.2351	67.6531	68.6052	77.2881	75.3774	73.734
ENSRNOG00000031824	Slc44a2	63.1959	64.0347	62.341	66.7647	65.2211	68.6586	80.3349	79.0937	81.7493
ENSRNOG00000020038	Chpf	93.3117	80.3728	88.9319	74.1643	69.4709	76.1297	52.3007	49.987	46.3789
ENSRNOG00000028996	Krt1	74.1102	76.7449	75.9296	65.3033	68.0078	68.1713	73.7736	64.9512	64.0334
ENSRNOG00000017495	Klhdc3	58.925	56.9399	58.3183	69.6427	69.9487	71.6679	84.5075	78.7512	82.2799
ENSRNOG00000020719	Hrc	35.5022	37.3722	34.3141	69.9861	71.0468	72.6878	100.449	105.068	104.232
ENSRNOG00000013712	Tex261	77.0419	70.8797	71.0163	73.3261	66.7344	71.5459	68.6018	65.8141	65.5601
ENSRNOG00000008015	Fos	101.671	99.5737	102.862	60.1129	56.4988	62.4606	47.8021	49.6653	49.8416
ENSRNOG00000056585	Fscn1	92.6347	82.1663	93.1856	78.7484	69.9158	72.2159	50.9602	48.0919	41.3887
ENSRNOG00000016383	Commd3	66.1801	67.6238	71.1628	69.2538	74.1499	71.9985	71.0823	69.7188	68.055
ENSRNOG00000034015	Capn2	67.7872	69.6075	66.0993	75.8403	79.1832	79.2881	61.8899	64.8894	64.3555
ENSRNOG00000020897	Prpf19	59.7576	58.0426	58.7325	75.3655	71.0438	74.3982	79.7534	73.968	77.464
ENSRNOG00000017446	Ndufs8	71.8205	71.9792	67.743	67.076	63.0478	69.311	76.573	67.6956	72.2573
ENSRNOG00000023383	Ddx3x	68.9394	73.1055	70.6789	68.7854	74.6812	69.7845	65.7936	67.8286	67.2876
ENSRNOG00000025909	Uqcc2	55.9503	61.0987	56.4389	77.0665	61.5208	76.7076	83.6501	77.6426	76.7841
ENSRNOG00000019868	Psma5	68.0859	65.5035	67.6959	70.0149	69.1975	69.9237	73.9409	72.06	69.5564
ENSRNOG00000011572	Klc1	62.6627	60.0259	64.3099	73.6501	73.4917	73.0876	74.2084	71.3993	72.9901
ENSRNOG00000005668	Ndufa8	63.3851	72.3127	72.3549	66.1001	67.8826	66.4905	76.1083	65.7943	74.6151
ENSRNOG00000005796	Ctnna1	79.456	79.6959	79.3221	64.9496	64.6182	64.6172	61.9872	66.0617	64.2653
ENSRNOG00000018109	Clic4	74.7099	72.5866	72.6231	74.9593	73.2502	71.6251	59.4579	63.2991	62.2969
ENSRNOG00000025053	Lrp1	73.5523	70.2121	73.8108	75.6948	73.7871	76.4033	61.1047	60.3026	59.6237
ENSRNOG00000016416	Rnh1	90.6357	87.8407	87.9637	64.2502	59.3375	62.7244	55.6088	58.5604	56.2945
ENSRNOG00000021166	Ecm1	62.7596	60.1981	60.7951	82.5709	81.8543	85.1616	64.407	63.5034	61.5843
ENSRNOG00000007514	Sox12	76.4809	65.2591	76.797	64.6841	67.2848	69.636	74.353	68.1836	59.8275
ENSRNOG00000003724	Mrpl27	60.8011	63.7445	62.1248	74.8171	69.9797	74.171	80.6688	64.9915	71.1105
ENSRNOG00000014204	Pacsin3	33.6043	33.2042	31.1958	86.7208	81.932	84.4526	89.6791	91.6777	89.9392
ENSRNOG00000003967	Vmp1	68.1898	71.8174	67.1719	79.7033	81.7957	82.7722	56.7483	56.6512	57.3957
ENSRNOG00000007029	Dnaja1	78.9092	74.8587	73.1465	66.5102	71.214	67.0949	62.5034	61.9906	65.5199
ENSRNOG00000015233	Etfa	58.3593	58.5571	59.5039	68.2127	69.4371	66.0119	79.9527	76.3277	85.0559
ENSRNOG00000053828	Ppp1r12c	72.345	69.6958	72.7317	70.4242	65.605	69.0121	70.7769	68.769	62.0308
ENSRNOG00000027487	Trim28	72.2453	73.4495	77.6987	64.6124	66.6329	62.1048	69.6276	70.4445	63.4832
ENSRNOG00000000465	Slc39a7	80.4465	76.9082	77.3834	74.9124	71.8041	73.3755	56.3129	53.8908	54.8811
ENSRNOG00000050490	Mir3064	38.876	62.4232	51.3355	80.7426	92.8279	74.146	75.4043	71.6166	72.2412
ENSRNOG00000043348	Rpl39	48.0875	57.2717	50.8815	83.5218	85.4989	86.6063	63.8571	69.0897	74.5715
ENSRNOG00000060069	AABR07059891.1	68.661	84.3524	84.8583	75.2257	67.8788	65.0722	56.1476	58.7548	58.428
ENSRNOG00000009513	Akr1b1	57.8658	60.9756	58.3276	78.2868	73.3628	76.1527	72.4436	69.8672	71.569
ENSRNOG00000015437	Tmem14c	77.1698	73.3428	74.0142	65.2167	63.0265	63.2192	65.6919	67.2378	69.1661
ENSRNOG00000011523	H2afy	83.1921	80.0918	78.1476	59.9125	60.7825	57.2689	67.6813	67.2215	63.3032
ENSRNOG00000020667	Shisa5	68.6679	64.9768	63.9773	76.65	77.7822	77.8058	64.8871	59.557	63.2622
ENSRNOG00000011763	Serp1	75.988	78.8171	80.5526	71.204	67.8147	69.993	57.9945	57.4978	57.6433
ENSRNOG00000012404	Thrsp	83.0879	85.1083	80.372	43.2646	43.8541	38.5641	84.9707	78.0779	78.8437
ENSRNOG00000014765	Vapa	68.6075	69.1902	65.5556	65.4094	69.1006	63.6667	70.8301	71.2622	71.5059
ENSRNOG00000014289	Arpc2	77.3166	81.0073	78.8201	68.6942	67.5692	67.0155	59.0818	58.0399	57.4774
ENSRNOG00000005184	Nop10	64.2065	72.6375	66.9626	63.4217	65.5543	63.0119	75.3144	71.649	71.4001
ENSRNOG00000004793	Ncln	78.3486	72.4429	75.5408	63.8488	59.7118	65.0459	69.4705	66.438	62.0655
ENSRNOG00000020102	Sirt2	65.9621	62.455	62.496	67.316	67.0892	69.5262	74.7518	72.5384	70.7391
ENSRNOG00000008947	Cpz	73.1104	75.8417	77.5497	83.7772	82.6334	81.2851	47.5763	44.9626	45.8978
ENSRNOG00000008459	Anapc13	60.2546	65.8872	61.6552	69.6539	71.4659	66.9188	73.05	70.655	72.7966
ENSRNOG00000050578	Rheb	69.1757	78.962	67.2349	69.7126	66.7602	67.4497	69.8385	58.2886	63.741
ENSRNOG00000005871	Il1rn	120.69	119.719	121.203	28.0003	28.4728	28.6005	54.2529	53.8495	56.0127
ENSRNOG00000016037	Mafb	96.8236	90.0559	93.1331	64.2829	64.4741	66.8772	44.9662	45.1606	44.347
ENSRNOG00000007369	Shisa4	53.6066	47.9978	56.1095	65.6264	61.093	71.8885	91.8759	78.8789	83.0021
ENSRNOG00000052506	Ak3	57.7106	58.6831	59.4637	74.9554	75.7153	75.7415	66.318	70.7373	69.5821
ENSRNOG00000002946	Socs3	110.692	94.7417	109.741	54.6962	49.1316	52.4201	48.1942	47.0314	42.009
ENSRNOG00000021962	Fzd2	73.4656	66.0886	74.072	70.9378	67.1289	75.6641	67.7829	60.5567	52.8906
ENSRNOG00000053494	Mcpt1l1	16.2162	15.6399	18.1663	72.7715	78.7128	75.9957	117.206	104.368	108.929
ENSRNOG00000021095	Fxyd3	56.4734	57.6032	61.626	60.0771	56.4753	59.864	86.2983	81.9285	86.2965
ENSRNOG00000001884	Ranbp1	75.7638	84.216	81.4604	58.1792	61.2796	60.334	61.8723	60.4752	62.8792
ENSRNOG00000006146	Trim54	23.6828	22.908	25.317	71.2982	66.3102	65.105	116.731	105.9	108.914
ENSRNOG00000024845	Mrps21	58.2366	65.5819	60.6099	69.7682	69.5699	63.3699	72.9592	70.7147	75.2846
ENSRNOG00000015591	Cndp2	78.0284	77.1313	82.9895	73.3829	76.772	73.5023	49.1513	47.0963	46.1799
ENSRNOG00000011489	R3hdm4	62.5749	59.4526	63.2909	68.8262	61.8159	68.479	77.8109	70.4463	71.3757
ENSRNOG00000011026	Irf2bpl	67.5567	59.3327	65.2099	61.8424	58.8942	62.388	78.477	77.5026	72.8051
ENSRNOG00000012455	Tardbp	73.6564	75.9369	71.402	59.3817	58.2297	60.468	68.7012	68.0958	67.5763
ENSRNOG00000001211	RGD1303003	60.9326	60.1067	64.5026	65.2985	62.2201	63.9072	76.0097	77.1994	72.4805
ENSRNOG00000003597	Tuba4a	46.7243	44.6273	49.4471	45.9677	42.1304	42.5929	111.324	112.979	106.047
ENSRNOG00000007763	Plod1	72.7573	72.5294	70.275	72.1186	71.8163	73.2069	60.0799	54.5939	54.4039
ENSRNOG00000032807	Rn60_X_0773.5	49.9675	55.7808	42.3138	77.0658	75.2738	70.7526	92.7934	60.8285	74.181
ENSRNOG00000021170	Plekho1	89.1892	86.7748	94.5848	55.1865	56.4633	58.8316	56.3642	51.1646	50.2381
ENSRNOG00000016269	Rpl7l1	71.0929	76.0775	77.6663	58.1186	58.7534	60.5514	65.4838	64.4498	66.6001
ENSRNOG00000012349	Mesdc1	94.1765	81.9263	89.4007	57.4763	56.8146	58.6597	58.687	52.1729	48.4632
ENSRNOG00000042620	Marveld1	87.2693	81.0919	86.3837	59.5612	59.5842	59.2737	55.3968	56.1452	52.9305
ENSRNOG00000009642	Cct4	62.0928	66.0533	62.9994	67.7916	72.3575	67.5011	64.2299	64.9852	69.3797
ENSRNOG00000049229	LOC100911238	60.0317	86.4094	44.989	55.8282	132.038	48.5419	42.887	86.9283	38.9127
ENSRNOG00000001030	Tsc22d1	56.0857	56.8189	56.9284	76.2607	78.546	76.6899	64.0933	64.4987	66.6076
ENSRNOG00000018456	LOC100911664	60.6645	62.61	62.0493	71.7299	77.2144	76.9084	61.522	59.974	63.6113
ENSRNOG00000008689	Cbx1	70.9521	72.8412	69.0188	57.5041	61.1576	60.2362	66.4305	70.8163	66.7568
ENSRNOG00000016603	Rtn2	29.7823	30.3513	31.6447	64.0005	59.8958	64.4836	106.349	106.221	102.385
ENSRNOG00000019019	Fitm1	35.5291	30.6124	33.0178	64.944	61.3385	67.4081	103.829	99.7733	98.2583
ENSRNOG00000007607	Nr4a1	72.853	69.8019	74.5227	56.6258	55.5869	59.3257	71.2672	67.5711	66.6834
ENSRNOG00000054489	AABR07042821.1	59.6047	55.478	114.701	48.8276	38.7733	63.055	42.8933	131.569	39.2927
ENSRNOG00000015177	Sun2	70.9998	64.3898	68.5172	50.9537	51.682	49.9012	80.8958	82.348	74.2728
ENSRNOG00000003289	Lap3	79.5646	78.2544	77.9615	54.9293	57.1006	57.6356	62.6418	62.4676	63.3425
ENSRNOG00000020263	Atp1a3	143.024	136.35	137.776	16.3328	16.9435	17.0767	43.9887	41.081	40.4927
ENSRNOG00000029418	LOC498231	65.6835	63.175	59.1852	69.9471	73.8341	65.1035	67.3441	64.9592	63.6827
ENSRNOG00000014241	Ece1	66.348	63.2965	66.0478	65.6695	62.0855	66.5603	67.0094	68.9266	66.8474
ENSRNOG00000019247	Plekhj1	59.9079	62.4051	62.4773	72.0658	64.7021	69.5681	71.7759	64.7301	65.1107
ENSRNOG00000021318	Epas1	67.2444	62.3099	63.8131	66.1065	65.1682	65.2679	66.805	67.6072	68.3112
ENSRNOG00000001314	Fam20c	121.324	117.277	123.533	26.2413	26.5217	27.0389	51.7758	52.1508	45.3894
ENSRNOG00000005580	Itgb4	55.4212	50.3957	54.364	56.5789	53.1016	52.3111	90.4259	91.2216	87.3217
ENSRNOG00000003869	Sod3	41.1128	41.6231	41.9114	74.3989	67.7907	73.8292	87.1659	83.8267	79.4721
ENSRNOG00000019890	Folr2	85.8862	88.6696	87.0451	57.2798	56.758	58.3005	51.9431	56.6884	47.7023
ENSRNOG00000022099	Trim72	45.2362	38.8767	44.5128	76.3943	75.4348	75.7034	81.3735	76.2356	76.3488
ENSRNOG00000012576	Selenos	69.364	72.1731	75.2347	72.1301	69.0373	68.06	53.8412	54.0454	56.0766
ENSRNOG00000037580	Psmd8	63.7026	67.7094	64.4211	61.1722	58.5328	57.9631	73.1318	72.2078	70.3823
ENSRNOG00000032951	Jsrp1	31.935	25.778	30.7867	70.3977	68.3327	73.0926	101.5	97.47	89.2593
ENSRNOG00000019442	Josd2	63.202	63.6189	66.5099	61.8971	56.1184	62.6724	76.7834	69.0027	68.1084
ENSRNOG00000020383	Dapk3	75.7767	77.3365	78.3088	59.4433	57.8306	61.5348	60.4513	60.4004	56.1287
ENSRNOG00000009751	Gpx7	66.7382	61.9402	60.2112	83.994	83.6999	81.2011	50.6268	48.6009	49.8558
ENSRNOG00000010018	Clec4a3	66.5383	71.9127	69.5869	63.9302	71.4387	71.7087	60.7059	55.7985	55.0669
ENSRNOG00000030210	Fndc1	77.924	77.4372	79.1754	78.6391	76.5209	79.3903	37.7515	39.6139	39.6466
ENSRNOG00000016474	Tspan3	74.8808	77.7389	79.2083	62.4349	60.9515	61.8861	54.6687	55.7862	58.272
ENSRNOG00000021085	Sf1	64.3646	63.9346	65.5867	61.4152	64.0044	65.3639	68.2865	66.3722	66.158
ENSRNOG00000030630	Ehmt2	68.8587	63.7745	68.3301	68.2606	63.3517	66.6876	66.1853	61.5575	57.0011
ENSRNOG00000038951	Cox17	69.5921	81.9385	63.7111	55.8018	53.0571	56.3553	74.3363	59.9287	69.0424
ENSRNOG00000060530	Cdc34	55.7881	50.8047	52.9777	69.2468	63.2252	65.2154	78.4391	76.3459	71.6548
ENSRNOG00000058645	Tnc	60.9916	61.1931	60.5996	87.7501	87.178	87.6147	45.4943	46.2688	46.5184
ENSRNOG00000019772	Dnpep	58.9495	61.4815	62.5911	69.3633	68.5305	72.6149	66.0215	62.8944	60.9364
ENSRNOG00000000123	Rnf19b	75.7753	72.4586	73.9495	73.7644	70.1377	74.3633	50.0622	47.9419	44.3815
ENSRNOG00000018598	Ankrd1	27.3713	28.7876	29.7229	104.336	103.795	111.132	59.9732	58.8746	58.7393
ENSRNOG00000000842	Ddah2	51.1505	51.4913	50.3852	79.3688	71.6153	80.0907	71.6757	62.2069	64.705
ENSRNOG00000061270	Git1	69.8814	62.8962	67.2481	64.4067	61.8059	67.0487	65.4643	62.4565	61.2335
ENSRNOG00000016137	Rad23b	68.7519	69.048	68.7584	63.4558	63.609	64.8206	60.0866	60.8088	62.9147
ENSRNOG00000017703	Unc93b1	78.0449	75.4339	76.0771	63.4636	57.1171	64.2407	56.54	56.6473	54.2105
ENSRNOG00000016975	Pxmp4	39.6201	36.3985	38.0778	49.4856	49.359	51.5025	108.127	101.11	107.2
ENSRNOG00000006327	Rcc2	89.8152	79.7806	81.3049	45.9735	48.6488	47.2099	62.6341	63.2652	62.0875
ENSRNOG00000023910	Man2b1	63.685	62.8498	63.8551	71.3808	70.6156	72.9134	61.4605	56.2528	56.9673
ENSRNOG00000016924	Acly	55.4257	53.1206	54.2875	51.1002	54.1073	51.6396	86.9842	87.618	85.3971
ENSRNOG00000019423	Dvl1	55.6637	54.5407	53.2631	70.3568	70.0966	69.4456	72.2238	70.1288	63.9446
ENSRNOG00000017023	Tcf25	64.7201	62.3727	61.6363	68.927	66.4823	66.8242	63.6564	62.507	62.0953
ENSRNOG00000020060	Atf5	61.7033	63.3673	61.6595	64.2621	65.2663	60.9556	69.6958	68.4533	63.439
ENSRNOG00000026109	Prmt1	68.6122	70.2218	66.872	63.0249	63.9108	62.4033	63.613	59.3742	60.6339
novel.460	-	68.3958	62.1877	68.6822	64.8828	62.7436	62.5296	67.3351	61.7118	59.6525
ENSRNOG00000018181	Stk25	59.5581	60.1416	60.4152	68.3415	69.7427	71.1334	64.4349	63.3837	60.9563
ENSRNOG00000017851	Etfb	57.5155	59.6849	59.9674	62.2073	63.6718	60.4152	70.973	71.6824	71.9105
ENSRNOG00000020167	Reep5	58.5157	59.7392	60.003	66.4789	63.8171	64.9857	68.0229	66.5729	69.7226
ENSRNOG00000046202	Metrnl	74.501	72.1968	70.1971	69.4034	65.0247	66.3879	54.3842	54.643	50.5263
ENSRNOG00000000851	Bag6	60.7974	58.4654	60.3604	61.6892	60.518	62.971	72.6354	69.8712	69.4518
ENSRNOG00000017243	Bnip3	30.8281	30.8003	30.8684	72.2127	77.079	74.2757	84.6323	86.8392	88.8636
ENSRNOG00000056038	Ehbp1l1	54.1883	53.1603	53.7065	70.0136	67.5081	70.2283	72.3449	69.1565	66.0788
ENSRNOG00000003661	Hn1	67.1404	67.3763	66.4697	67.9439	63.1481	69.0012	59.1697	57.5112	58.2528
ENSRNOG00000012966	Acadl	40.0585	43.5658	42.0527	67.0664	68.1297	71.8497	77.6979	80.2966	84.8178
ENSRNOG00000039473	Ccdc152	33.8133	41.3707	36.1225	95.8546	108.946	93.4781	50.6522	55.8525	58.2414
ENSRNOG00000050190	Eng	72.3263	65.1367	69.9117	66.5101	61.2992	63.4707	59.4614	58.0317	57.8656
ENSRNOG00000017463	Bloc1s3	79.5139	64.7169	71.3469	61.9665	53.9903	53.8374	71.7331	64.8991	51.7298
ENSRNOG00000006762	LOC100359574	67.7133	75.4432	70.09	56.1204	54.5315	56.4481	63.7219	62.921	66.6859
ENSRNOG00000029698	Pim3	58.3405	51.3719	59.5966	60.129	55.0885	53.7705	80.843	78.5715	75.8965
ENSRNOG00000009297	Chchd1	50.5159	54.1129	50.9838	63.3948	68.0674	63.7434	77.0168	73.7024	71.2218
ENSRNOG00000009029	Nptn	70.9565	75.9299	73.8901	60.8808	60.7018	57.8798	55.7243	57.3144	59.4115
ENSRNOG00000009080	Atp6v1d	81.0191	79.8013	78.4304	54.3484	54.4167	52.7262	56.7023	58.981	55.777
ENSRNOG00000013743	Sec61a1	71.1951	72.8559	73.6237	69.5671	64.4814	67.403	50.2977	51.1445	51.6313
ENSRNOG00000033299	Mt-atp8	74.0549	78.2531	70.7654	58.4965	72.3749	47.1494	59.0332	52.5766	57.6875
ENSRNOG00000005884	Emc7	56.1001	60.0422	58.0811	64.0068	68.8234	67.2073	66.3651	62.6351	66.9576
ENSRNOG00000056135	Tsc22d3	50.9643	50.2696	49.5688	64.838	67.233	65.3447	72.0288	72.7418	76.9481
ENSRNOG00000017352	Ctdnep1	61.5646	54.9871	58.6929	62.3174	62.8981	64.9797	70.3926	68.4319	65.2907
ENSRNOG00000009643	Msl1	73.0739	67.1294	71.3477	57.1521	58.0434	56.9686	68.7562	60.7899	55.866
ENSRNOG00000003343	Canx	71.9738	77.5022	70.8385	58.281	61.4148	59.4416	54.9043	55.9978	58.6353
ENSRNOG00000032204	Uqcrb	50.0375	62.9988	58.642	56.9448	65.6958	58.9681	74.8228	74.6338	65.9341
ENSRNOG00000007649	Dnm2	77.8027	66.6776	73.8253	56.8972	57.2807	58.1237	62.5022	56.7075	58.7538
ENSRNOG00000000068	Ppp2r5a	60.9534	59.5871	63.6333	65.5197	61.6239	62.0504	63.7236	69.8675	61.5275
ENSRNOG00000021771	Trim29	86.2903	80.8909	86.6665	40.7266	38.3959	39.1772	66.8942	64.724	64.5478
ENSRNOG00000016552	Hmgcs1	48.3728	50.4546	50.5045	49.4297	51.5462	48.5486	85.29	90.2159	93.3725
ENSRNOG00000018325	Cnppd1	66.7356	64.3632	67.291	58.8366	59.7765	62.234	65.5143	61.4249	60.8114
ENSRNOG00000031955	Calml3	59.0081	63.1477	62.7474	51.5711	50.0704	50.7348	74.8521	78.0046	76.6834
ENSRNOG00000019915	Xrcc1	61.6389	56.3551	62.0113	59.3665	61.1094	59.9444	73.3326	67.2084	65.5841
ENSRNOG00000018825	Dcaf11	53.7172	54.9669	55.3469	62.7677	63.8724	65.1172	70.593	70.1088	69.1352
ENSRNOG00000056207	Capza2	58.8119	64.6103	59.8443	64.2982	69.1352	63.5194	60.9134	62.9463	60.4335
ENSRNOG00000006094	Cd44	80.6877	83.4594	79.0238	54.0247	54.6268	52.29	53.5257	53.0406	53.7947
ENSRNOG00000025691	Pla2g7	126.975	136.108	124.195	17.5884	18.7658	17.4659	42.8392	39.3357	40.9204
ENSRNOG00000039976	Ptk7	87.1852	83.6335	89.611	66.245	58.8958	62.9119	37.2279	39.6145	38.5793
ENSRNOG00000018937	Gstm7	31.9702	34.7465	34.7761	67.5474	61.6571	70.518	96.9945	81.1621	83.6137
ENSRNOG00000005413	Creb3l1	93.2114	86.8646	94.8316	64.6085	62.2152	65.06	35.0246	31.0693	29.8736
ENSRNOG00000047088	Rab10	58.0367	60.5131	58.7642	59.9572	60.8601	59.803	64.3967	69.1225	71.1002
ENSRNOG00000014109	Psmd13	63.7883	58.944	63.4893	66.7019	60.6012	60.1289	63.4658	63.399	61.5855
ENSRNOG00000043044	Cnn2	78.8072	81.3935	82.6151	67.6348	65.2279	63.3015	41.276	40.9131	39.6423
novel.454	-	32.2219	34.6784	33.1435	66.4121	63.1606	64.8311	93.983	82.8572	89.3181
ENSRNOG00000013255	Dnajc8	61.0369	64.2339	61.6495	64.5487	63.69	63.876	64.3617	59.5139	57.6911
ENSRNOG00000055572	Idh3g	53.6915	53.5632	51.2888	62.8556	58.5054	56.5422	75.4297	71.3503	77.2295
ENSRNOG00000019028	Znrf1	71.9598	65.5725	70.3156	54.8129	59.0159	59.5616	62.7475	59.5144	56.8225
ENSRNOG00000011029	Sec11a	66.2016	72.2474	68.9744	61.3832	65.5202	63.6297	57.5713	52.1264	51.9173
ENSRNOG00000019708	Ctsf	70.2204	68.5502	70.0518	67.2142	61.2527	63.7419	56.0965	51.4207	50.9166
ENSRNOG00000003689	Nono	63.4639	63.9878	61.4373	62.9985	62.2862	62.2762	61.6519	59.6297	61.3547
ENSRNOG00000003228	Mid1ip1	53.1934	50.7932	56.0103	57.0391	57.3073	55.6934	79.3913	75.784	73.7957
ENSRNOG00000017949	Mvb12a	67.1181	66.2011	68.9213	62.7652	64.7074	66.0363	56.3932	55.0316	51.1198
ENSRNOG00000050108	LOC100911319	74.1501	67.7281	72.9158	55.5624	45.983	52.9946	65.2319	67.7486	55.8035
ENSRNOG00000007613	C1qtnf5	79.9942	78.0565	76.3482	65.4717	65.79	68.8815	42.5958	40.1286	40.8057
ENSRNOG00000019936	Anapc15	69.1973	75.2939	64.227	57.6892	60.724	55.7627	57.2729	56.0263	61.4862
ENSRNOG00000020032	Impdh1	70.8063	68.3295	75.288	63.1961	64.8189	63.3404	53.0586	51.0094	47.6472
ENSRNOG00000016950	Otud1	77.3981	69.2409	86.4049	47.8805	46.8872	56.2097	62.9965	63.0119	47.4526
ENSRNOG00000055082	Maz	62.8875	62.7347	66.8932	58.448	59.638	57.2436	65.724	62.723	61.0484
ENSRNOG00000017765	Net1	42.0326	43.6276	41.1927	61.9448	65.7803	64.4764	79.7165	76.5854	81.7884
ENSRNOG00000001223	Pttg1ip	73.754	71.8516	75.5009	54.8522	55.2603	58.2138	55.5692	55.8798	56.0904
ENSRNOG00000019430	Coro1a	73.4656	70.0319	72.1349	60.7983	56.5176	58.864	58.0472	53.7676	53.0911
ENSRNOG00000009325	Fuca1	66.0162	69.0895	68.1871	67.7127	64.9897	63.2218	52.8918	52.0119	52.1808
ENSRNOG00000042523	Ube2d2	64.6831	67.4675	60.6511	58.7648	65.4757	63.9822	57.1003	55.0206	63.0803
ENSRNOG00000017737	Dgkz	66.9491	63.6387	65.242	54.9161	52.6195	55.6363	67.8343	64.9099	62.7139
ENSRNOG00000009217	Fbxo6	59.4603	60.3847	58.4968	65.221	60.3467	59.5313	67.7611	62.0086	60.1402
ENSRNOG00000055524	Trip10	49.0095	47.2101	45.6491	70.2451	66.9805	66.4493	69.9208	69.5693	66.7968
ENSRNOG00000049780	Sri	67.4236	69.408	68.3469	59.9247	62.383	62.7696	55.4161	52.4518	53.5592
ENSRNOG00000031387	Dazap1	69.433	68.3222	71.9254	54.8289	55.2771	55.4242	57.142	59.8253	59.3543
ENSRNOG00000012957	Sh3glb1	56.1982	60.0964	53.5128	68.83	70.9516	67.5396	55.446	57.842	61.0077
ENSRNOG00000020587	Efemp2	59.5287	61.5652	60.2694	78.0548	70.7574	74.7542	51.2387	47.3353	47.6034
ENSRNOG00000018556	Tomm40	81.3066	69.2666	74.494	49.081	46.5128	48.6637	60.368	61.9086	59.3376
ENSRNOG00000019357	Tax1bp3	70.5866	72.7456	70.38	61.8817	59.8428	61.7587	52.2736	49.476	51.8715
ENSRNOG00000018186	Lamtor5	60.5242	61.9891	59.6862	60.5187	61.7732	59.0415	61.619	62.9371	62.5683
ENSRNOG00000009094	Nudt4	50.3401	53.4707	55.9102	60.541	62.1226	61.5906	68.0208	69.5891	69.0219
ENSRNOG00000008703	Rnps1	66.3324	64.3703	67.2411	60.2268	56.6944	54.5601	61.7115	60.6334	58.7297
ENSRNOG00000041826	AABR07053152.1	49.6519	57.4337	58.1321	53.6998	56.7864	60.1154	64.6197	85.3817	64.061
ENSRNOG00000000699	Selplg	101.996	86.9172	88.7746	44.0717	47.4609	47.0045	49.9752	42.8508	40.4809
ENSRNOG00000001385	Plbd2	65.2957	63.5866	61.7598	64.9277	55.811	62.7669	60.0328	58.8737	56.2931
ENSRNOG00000020947	Egln2	51.1565	49.2418	53.0025	66.4362	61.4312	65.509	72.2859	66.6783	63.5726
ENSRNOG00000008016	Ckap4	81.4221	81.424	80.9545	67.7531	63.188	65.7291	37.0039	35.4922	36.3344
ENSRNOG00000020173	Tie1	78.9266	72.8539	76.1284	54.4631	54.6972	56.9389	53.9161	52.4026	48.8013
ENSRNOG00000013039	Add1	63.7248	63.4411	62.7266	63.0438	62.8171	62.1155	56.8387	56.3655	57.2296
ENSRNOG00000018533	Iffo1	52.7087	47.5324	51.6702	71.3046	64.4337	69.1801	67.339	61.4485	62.6366
ENSRNOG00000023633	Crabp1	77.7837	78.4393	77.598	60.8608	58.954	59.5411	47.7017	40.0903	45.78
ENSRNOG00000019070	St13	57.2029	59.1191	59.9567	59.2596	60.7206	62.3246	60.7599	62.8702	64.1552
ENSRNOG00000016807	Oat	60.1455	61.0729	59.7875	59.185	60.2509	60.7957	63.1484	59.8146	61.8121
ENSRNOG00000018145	Crat	39.9229	38.1096	37.9455	63.9555	58.8191	60.3883	83.9672	83.2361	79.5447
ENSRNOG00000001336	Orai1	50.55	47.1461	53.3655	64.6652	56.8298	65.3308	70.578	71.3432	65.6808
ENSRNOG00000012428	Maf	65.6194	63.5705	66.6501	56.5817	62.5909	59.4514	59.5003	57.5826	53.6739
ENSRNOG00000019164	Uba1	59.0611	60.1329	61.0989	63.6236	61.0791	59.0844	60.2619	61.0426	59.7834
ENSRNOG00000006052	Sulf2	82.5984	80.3821	83.3361	53.1131	52.3842	52.9121	48.9309	45.8425	45.2915
ENSRNOG00000000288	Scarf2	75.8489	71.3527	77.5855	64.7552	62.0486	66.9821	46.333	41.763	37.8131
ENSRNOG00000046261	Acp5	104.633	101.232	103.173	44.5112	39.4532	41.2827	40.1242	36.2247	33.5752
ENSRNOG00000001135	Wsb2	57.9346	55.7549	59.8983	64.8773	60.8694	65.3802	59.7928	60.4403	59.0807
ENSRNOG00000011541	Cygb	56.727	50.8141	55.8786	62.1317	63.1516	63.8391	66.5649	64.9544	59.0291
ENSRNOG00000016398	Clstn1	63.9874	59.4982	63.2419	59.1034	60.9229	59.859	60.757	59.3506	56.1847
ENSRNOG00000002004	Prdm8	53.6981	46.8405	49.6135	77.403	72.7107	72.6096	60.8453	60.8959	48.0028
ENSRNOG00000045860	U2af1	60.1188	62.561	65.2025	57.3311	59.5986	59.3506	58.0657	60.3091	59.5777
ENSRNOG00000024278	Rbm42	66.6998	61.3507	63.9499	55.5519	54.2106	53.6946	63.8293	64.6489	57.6069
ENSRNOG00000007492	Rpn2	62.2894	65.7742	62.3548	66.6073	61.1283	60.7264	53.9877	54.971	52.1867
ENSRNOG00000015097	Kcmf1	56.4292	55.016	55.0038	62.1299	62.5248	61.557	61.4885	63.041	62.5842
ENSRNOG00000061684	Ndufa9	60.5887	62.6263	57.7758	56.0045	54.2553	54.623	67.4325	60.5119	65.015
ENSRNOG00000026604	Cercam	66.0974	64.7668	68.7171	74.4735	71.8318	71.7843	42.0748	39.7476	39.2303
ENSRNOG00000011865	Fam96b	51.0226	56.0163	52.0085	68.3433	63.2131	62.6101	70.952	54.1699	59.8464
ENSRNOG00000010448	Ptbp1	72.5971	69.0793	72.2238	52.1545	50.7548	52.4719	56.1546	56.2569	55.7978
ENSRNOG00000056870	Gdi1	58.8429	56.6565	56.6645	63.925	63.5186	61.5192	60.8105	56.2792	59.048
ENSRNOG00000005358	Pmm1	53.0847	56.1975	56.1798	62.7041	62.0409	62.5259	64.3938	58.9995	60.7044
ENSRNOG00000039297	Mrpl52	56.2452	56.7359	57.9494	65.4894	62.0533	65.7552	59.8023	55.0963	57.6588
ENSRNOG00000021224	Mrps26	56.574	59.6975	55.6999	66.4604	57.6021	67.262	58.3204	59.6581	55.443
ENSRNOG00000053659	RGD1311703	58.3932	61.1474	62.1339	57.7568	58.1238	55.6132	60.9402	59.7104	62.3138
ENSRNOG00000031641	LOC108349682	50.2557	49.8847	47.1341	68.8045	60.7411	73.7978	62.4498	58.6545	64.4101
ENSRNOG00000003747	Asna1	68.1606	66.3353	64.2558	58.3877	52.5176	54.1817	58.353	55.5713	58.2949
ENSRNOG00000034290	Ccl21	39.1015	40.7976	41.6636	62.2992	65.0152	67.4517	78.7017	71.6438	69.0219
ENSRNOG00000055025	Fam25a	60.0707	67.4478	64.793	54.0976	55.84	53.113	61.3887	54.1927	64.4169
ENSRNOG00000018343	Isca1	49.9631	50.4458	51.1899	58.163	58.4626	58.0423	69.2128	69.527	70.1284
ENSRNOG00000013324	Cdh5	62.0434	60.2675	61.1049	68.8227	67.0083	68.0403	48.3243	49.0034	50.4943
ENSRNOG00000020255	Sars	59.0916	59.5087	62.1393	56.2906	57.5109	58.4686	60.6673	61.0106	60.3832
ENSRNOG00000018322	Picalm	58.9097	63.8696	61.277	64.3804	70.0748	65.3652	49.9406	50.734	50.3102
ENSRNOG00000045924	RT1-T24-3	37.6572	35.1187	35.3918	89.2013	84.4578	84.2582	58.4917	55.2674	53.7133
ENSRNOG00000028585	Tceal8	58.9215	60.4757	57.6619	62.4735	69.9314	66.2746	55.2238	52.1001	50.2519
ENSRNOG00000014525	Hspd1	63.8307	64.9108	64.8885	51.2031	52.9652	51.4249	61.5413	59.8981	62.5172
ENSRNOG00000019742	Stat3	57.7055	57.9885	56.7361	65.4217	62.351	65.7745	55.853	54.7296	56.3794
ENSRNOG00000009449	Trim35	56.3971	54.2086	54.6406	56.3715	55.9812	57.5381	67.2196	64.1178	65.6897
ENSRNOG00000003706	Ufc1	58.8379	57.6567	59.1411	57.2307	59.5584	64.3154	59.1417	57.485	57.2909
ENSRNOG00000019812	Nr1h2	64.6973	62.2959	63.8223	56.983	55.7992	57.2266	57.2299	56.8427	55.1495
ENSRNOG00000020715	Ddb1	61.7046	63.0782	62.3955	59.6852	58.9211	57.0906	54.7373	56.5573	55.8654
ENSRNOG00000020016	LOC100361543	71.6776	65.2806	68.5528	52.9379	47.322	53.1445	60.9372	55.3449	54.6236
ENSRNOG00000008235	Mylk2	20.6922	22.9319	23.5044	47.709	46.8385	50.104	108.779	105.765	103.336
ENSRNOG00000011020	Eif3l	55.1694	58.5349	58.5259	63.5922	61.0558	56.9596	60.3507	58.1122	56.9963
ENSRNOG00000017307	Prss23	49.558	49.2409	47.6925	74.6927	78.8028	72.8493	51.5714	51.2218	52.5297
ENSRNOG00000042261	Hdgf	53.791	57.172	55.496	57.4903	56.9427	59.3324	63.1014	64.1457	60.4412
ENSRNOG00000057278	SNORD47	75.1353	72.5002	65.8333	59.1565	63.096	42.6855	51.2138	51.3846	46.8442
ENSRNOG00000021004	Rasip1	61.3132	57.0846	59.9716	61.6941	60.4941	59.7045	57.3826	56.378	53.7307
ENSRNOG00000038218	Ndufc1	53.4165	56.452	57.7788	51.6557	61.9693	51.8853	60.428	70.7104	63.3937
ENSRNOG00000028747	AABR07073039.1	47.6509	52.9237	53.6157	62.0144	65.772	63.3084	65.9354	55.4217	61.0458
ENSRNOG00000004904	Pa2g4	70.5747	71.5479	72.5267	49.8378	49.5154	47.782	55.9478	54.2644	55.6777
ENSRNOG00000007541	Fhl3	36.5482	34.4354	37.9034	48.5669	43.0266	47.2574	94.4909	96.6039	88.8353
novel.343	-	106.641	117.813	98.993	25.8779	25.3429	25.5308	43.1366	42.2699	41.9508
ENSRNOG00000007133	Plxnb2	76.6255	74.5673	75.4609	49.1367	47.7489	48.8574	52.4944	51.2898	50.6446
ENSRNOG00000015461	Serpine2	64.9352	64.9727	65.9381	71.4243	72.7062	73.1164	36.8731	37.511	38.9394
ENSRNOG00000017372	Higd2a	47.8171	53.8517	57.3167	62.7515	59.437	59.9127	64.3677	59.059	61.7823
ENSRNOG00000030871	Calm2	64.2847	66.9758	61.3174	48.9198	54.3787	48.3602	64.6465	57.6364	58.8065
ENSRNOG00000054999	Hilpda	77.1193	71.8427	73.52	47.0052	48.9922	50.1545	52.0644	49.1453	55.4544
ENSRNOG00000002807	2019-09-09	70.9744	72.9317	72.5369	53.7228	54.75	54.8372	48.2809	46.6606	49.6285
ENSRNOG00000018987	Crebzf	60.5245	58.8653	61.0617	54.1479	53.5536	55.7274	64.3243	57.8304	58.0565
ENSRNOG00000045791	Eif4a3	63.2506	60.7521	61.3293	55.7594	55.5966	54.7161	58.9019	57.1657	56.5951
ENSRNOG00000016251	Dnaja2	56.4373	59.6756	56.2186	56.1821	58.29	56.9317	57.4667	59.737	63.1238
ENSRNOG00000050669	LOC100911515	62.2809	52.293	34.1481	45.6507	44.593	57.1933	69.9176	76.5375	81.1934
ENSRNOG00000008116	Plpp3	57.3345	60.6856	54.2019	57.2915	58.6668	56.8823	57.5814	59.9525	61.1536
ENSRNOG00000009856	Sypl1	52.9251	51.236	52.1952	52.3146	52.0111	55.7723	66.9945	69.2782	70.9164
ENSRNOG00000055583	Ttyh3	76.9956	73.0146	77.5391	58.4658	56.0341	56.1547	42.1316	42.869	40.0213
ENSRNOG00000007842	Aup1	54.7754	52.2417	55.0478	59.2611	58.187	61.2793	61.7175	59.545	60.9581
ENSRNOG00000019926	Ramp1	40.6983	43.305	40.2296	54.6122	49.1292	56.0537	81.0655	78.6677	79.1659
ENSRNOG00000031743	Gbp2	32.1518	30.5573	28.7224	105.24	106.028	105.527	37.4823	38.5894	38.5779
ENSRNOG00000009992	Rabggtb	52.8894	56.0633	51.7314	61.6763	61.2607	60.0228	60.2515	58.1536	60.7651
ENSRNOG00000030442	AABR07027322.1	57.2048	52.329	44.1479	62.3553	58.8778	67.2541	62.4107	59.2315	58.9067
ENSRNOG00000006305	Slc38a2	54.5664	58.1693	56.6584	56.8816	57.8045	58.1051	56.7173	61.0301	62.277
ENSRNOG00000053790	AABR07036007.1	56.0377	53.1313	50.8708	68.0582	68.8106	62.5204	56.3135	53.499	51.898
ENSRNOG00000050231	Gng12	66.2225	60.6561	68.5197	56.0375	54.5413	56.4368	51.3501	53.0972	54.0302
ENSRNOG00000008830	Nfe2l1	47.157	45.138	47.4156	58.7944	60.5844	61.09	67.0958	65.2337	67.823
ENSRNOG00000005298	Zfp513	60.256	54.9974	59.092	58.7316	58.0201	59.6436	60.0446	56.6848	52.2197
ENSRNOG00000011093	Ssna1	64.6379	64.4718	59.3803	56.3557	53.7505	53.6917	59.8264	55.3425	52.1105
ENSRNOG00000028350	Arse	64.7271	61.1523	66.2007	57.5143	51.7553	52.8199	60.825	55.2208	48.9258
ENSRNOG00000001222	Ube2g2	53.8457	49.7848	53.2675	56.7422	56.5073	56.1552	67.2599	62.9258	61.1094
ENSRNOG00000018932	Ccdc124	55.1491	55.0575	51.3072	55.3801	51.8275	56.0387	67.2627	62.9143	62.0988
ENSRNOG00000013443	Tm9sf3	62.66	67.9689	65.3646	58.0403	59.3676	53.3345	48.1159	51.1252	50.8043
ENSRNOG00000023375	Rab34	59.3901	61.0824	57.0925	61.0134	58.5535	58.287	53.9402	52.9753	54.0884
novel.34	-	70.9418	61.5705	72.9816	44.5083	42.0701	44.8285	62.878	62.9184	53.3663
ENSRNOG00000002997	Slc9a3r2	58.7148	53.8008	56.412	59.3637	54.3343	56.5673	60.9625	60.791	55.0591
ENSRNOG00000058561	Srrm2	55.1584	53.3574	55.6673	57.5105	54.8881	55.6991	61.5736	60.7744	61.2659
ENSRNOG00000056756	Actn1	66.9053	66.7164	67.9398	53.8413	52.6115	53.7885	51.6171	52.7602	49.2395
ENSRNOG00000051170	Ddx17	56.6224	58.3071	56.9098	56.6941	56.4789	56.1346	56.9522	57.8674	57.5053
ENSRNOG00000055446	Amfr	58.1576	56.6623	57.0043	54.1312	54.1682	53.0724	59.6777	61.3192	59.0772
ENSRNOG00000014097	Psmd7	53.9174	54.6127	56.063	56.0549	57.402	53.5245	61.9379	58.9412	60.8024
ENSRNOG00000002205	Ociad1	53.37	58.2504	56.1037	56.8167	57.1337	56.0659	60.0972	57.9175	57.4927
ENSRNOG00000014828	Avpi1	76.5308	78.3064	75.704	53.0858	46.1496	47.8271	45.0344	45.5147	45.0449
ENSRNOG00000007426	Tmem64	54.8356	52.9641	58.3021	54.0138	53.7977	50.9017	63.2799	72.0489	53.0303
ENSRNOG00000028166	Asmtl	58.5752	54.5775	55.3832	59.8453	58.1071	55.8476	60.1114	58.1836	52.3523
ENSRNOG00000019178	Taf10	57.1899	55.833	57.8688	58.6288	54.0235	55.6061	62.1933	56.0825	55.1894
ENSRNOG00000037607	LOC100911575	44.5342	81.0809	34.8013	51.208	53.6161	115.872	39.1635	49.151	42.8164
ENSRNOG00000015655	Ptgfrn	65.8903	65.3119	67.7474	66.3964	67.7797	66.2428	36.5995	36.86	37.5081
ENSRNOG00000018653	Pfdn1	49.6667	47.7677	47.6066	59.787	65.5871	72.8352	55.5943	57.8876	53.3194
ENSRNOG00000004604	Slc38a10	67.2653	63.639	65.5449	65.058	60.2689	65.249	40.2887	42.7097	39.992
ENSRNOG00000024899	Cxcl13	42.2289	45.655	44.1439	65.9931	72.1415	74.1647	55.0285	55.905	54.5413
ENSRNOG00000041870	Mir1893	49.4263	47.551	49.6107	55.5928	45.6116	48.3916	89.1795	62.5719	61.7455
ENSRNOG00000024629	Hadha	41.4603	43.0209	44.7954	53.8284	53.0366	53.6375	72.9532	72.6315	73.9475
ENSRNOG00000005587	Suclg1	49.3419	49.7097	48.2695	52.3944	51.9714	53.9394	70.5259	66.505	66.5699
ENSRNOG00000020130	Arhgef1	58.9964	58.3394	58.9084	55.3944	54.9092	57.0982	57.1818	56.1311	51.9533
ENSRNOG00000004245	Mgst3	67.8305	79.6218	57.1632	49.8546	43.6264	59.0144	59.8222	53.0637	38.832
ENSRNOG00000020791	Ube2q1	59.817	59.9828	62.2575	55.6799	54.6214	54.6338	57.1188	52.0122	52.5499
ENSRNOG00000029592	Srsf11	51.97	52.3886	55.4797	59.7521	63.6033	60.9669	54.0545	55.8497	52.685
ENSRNOG00000001346	Cops6	57.2343	54.8387	55.4642	57.4679	56.8487	58.03	56.9924	53.2263	56.5952
ENSRNOG00000018943	Tnnc1	16.5164	13.4398	15.991	116.501	115.516	116.601	37.999	37.9535	36.1077
ENSRNOG00000031269	RGD1304694	93.5693	87.69	91.1086	37.4115	33.7025	34.2834	42.7005	42.0875	44.0388
ENSRNOG00000016937	Mtfr1l	44.5427	45.6349	49.285	65.4466	60.7178	65.5014	53.8338	59.7912	61.3895
ENSRNOG00000007249	Cdkn1b	46.3798	50.5152	50.3204	57.177	58.2425	59.835	61.2557	58.4771	63.5675
ENSRNOG00000009102	Fermt2	46.1545	48.5313	44.4508	66.717	67.801	65.6415	53.6884	55.6064	57.143
ENSRNOG00000021317	Cct2	52.826	55.5944	56.1039	51.04	58.2362	61.2324	53.0535	60.7582	56.5524
ENSRNOG00000061176	Nudt3	49.1863	51.5145	50.399	53.5528	53.0038	55.4192	66.0312	64.2209	61.5545
ENSRNOG00000007136	Anxa7	67.254	62.0117	61.5771	51.5818	53.4132	53.0477	48.1275	53.7785	53.7575
ENSRNOG00000002722	Sec14l1	66.6424	64.805	64.8379	50.2284	48.0793	50.6063	54.3782	53.0399	51.7694
ENSRNOG00000031208	Mgat1	57.1121	55.1724	57.8976	63.0003	57.5313	59.7518	52.9452	49.9013	50.6611
ENSRNOG00000015588	Nol3	34.8812	34.5112	33.8208	66.5237	60.0478	68.4171	69.2604	68.3076	68.0133
ENSRNOG00000000443	C4a	30.8463	37.2847	32.9259	83.6324	74.2108	61.6036	63.9447	59.6989	59.5396
ENSRNOG00000011279	Cmc2	54.807	66.0243	65.8023	57.0146	52.5049	51.5275	54.0945	47.5127	54.3728
ENSRNOG00000043203	Krt75	116.59	109.272	116.894	17.8857	17.2264	16.0919	38.962	35.3807	35.3564
ENSRNOG00000006751	Psmd6	53.156	49.4277	49.44	56.6999	56.6255	55.3339	61.1623	58.9393	62.4449
ENSRNOG00000053210	Zc3h11a	54.3491	55.1632	52.4938	58.851	59.9106	59.8402	53.4841	54.8774	54.224
ENSRNOG00000014058	Tomm22	61.7666	56.2756	56.1097	52.8824	56.4451	55.2603	53.6121	54.5325	55.561
ENSRNOG00000001348	Erp29	66.282	68.4368	66.5211	56.702	52.7632	51.6457	48.429	46.3538	44.9835
ENSRNOG00000016560	Card19	62.9537	61.3056	60.8528	54.7422	53.2708	55.2278	56.4785	48.6456	48.2663
ENSRNOG00000010107	Palld	67.6492	58.0059	66.8451	58.3599	52.0154	58.0475	47.1484	49.528	44.0462
ENSRNOG00000001431	Rasa4	54.4271	52.7256	51.5727	61.5924	59.4288	60.9024	55.1182	52.8445	52.9227
ENSRNOG00000016227	Glrx3	62.4001	62.7444	58.6215	48.8436	51.8256	47.974	56.767	55.0456	57.2835
ENSRNOG00000021101	Sema6c	52.8362	41.5631	52.4975	48.0355	41.1767	48.8426	78.8197	75.5015	62.1143
ENSRNOG00000019400	Dag1	47.004	46.7706	47.3594	55.9424	55.8037	55.6013	61.7369	65.3691	65.5585
ENSRNOG00000006130	Rab5b	60.4088	59.1783	60.4126	50.6543	51.2534	50.8161	55.2747	55.5822	57.3811
ENSRNOG00000002632	Naca	46.1056	47.4639	48.017	57.4488	59.4382	60.7032	58.909	63.3414	59.448
ENSRNOG00000016496	Ctsc	59.9398	61.4525	60.593	60.3386	64.9046	63.3959	43.0088	44.5521	42.6668
ENSRNOG00000033426	Cdc37	58.897	54.4992	57.7632	55.4106	50.6864	54.4374	57.0186	56.1867	55.7259
ENSRNOG00000010557	Smarcd2	47.3902	47.9715	48.8949	59.978	58.1989	57.0766	60.9581	60.9887	59.0623
ENSRNOG00000012641	Sfr1	47.3619	54.8426	52.422	62.6894	67.9049	64.3768	49.559	49.144	51.9422
ENSRNOG00000015434	Midn	67.7064	61.2486	65.6194	52.3075	50.202	52.8487	51.053	50.7297	48.4882
ENSRNOG00000020683	Hnrnpul1	59.9197	55.4311	59.4356	54.0704	52.3643	54.9367	54.9972	54.2958	54.7491
ENSRNOG00000024128	Aco2	49.9593	50.2873	51.8494	52.0962	49.3036	51.6604	65.9081	63.0836	65.9677
ENSRNOG00000010233	Cald1	64.636	66.4659	65.8895	59.76	65.1895	62.0336	38.0232	38.2322	39.5987
ENSRNOG00000011825	Ndufb3	48.0824	51.4499	49.3291	54.6033	57.4292	51.3621	62.298	60.3411	64.8051
ENSRNOG00000023816	Aph1a	64.7666	64.9326	65.1603	56.3338	50.4557	52.9522	48.94	47.9403	48.0333
ENSRNOG00000019804	B3gat3	59.2013	59.58	57.5535	57.1814	49.5812	54.2925	57.5882	51.8242	52.4571
ENSRNOG00000020716	Axl	48.6239	47.8997	48.7228	67.9385	68.3546	65.4178	50.9667	51.0075	49.9046
ENSRNOG00000004292	Sptssa	44.6705	51.8449	46.0456	43.9718	47.9338	45.9412	72.1934	71.9932	74.2066
ENSRNOG00000006783	Neb	23.1273	23.0339	24.3843	60.3879	61.0261	62.5732	75.0157	84.3486	84.8541
ENSRNOG00000015033	Mxd4	57.7055	56.657	57.8719	61.0074	57.6132	59.1895	49.6707	50.7208	48.2008
ENSRNOG00000056728	G6pd	82.3542	79.8206	80.0334	35.0979	37.2895	36.0171	49.1929	48.837	48.8482
ENSRNOG00000020994	Slc25a39	63.54	58.0096	59.8083	53.8076	50.9384	51.8978	52.4032	53.7551	53.2651
ENSRNOG00000004737	Cd48	51.3336	54.7225	49.772	56.9531	65.0357	58.758	53.0855	52.1633	54.2268
ENSRNOG00000017078	Selenon	67.2326	62.6089	69.5176	59.0297	57.6725	58.7084	43.0217	39.1089	39.1417
ENSRNOG00000008794	Ube2e1	56.646	55.7327	55.3821	56.8003	57.4225	54.1682	51.8749	51.5549	56.3694
ENSRNOG00000059061	Uqcr10	48.5997	47.4125	50.452	53.6836	49.5974	60.7116	61.0377	60.3059	64.1189
ENSRNOG00000052113	Ppp1r9b	65.7382	58.8411	64.4945	53.6838	52.2352	53.1769	51.1366	49.2645	47.0316
ENSRNOG00000019494	Psmb10	47.0073	51.8684	48.5893	74.2835	61.5757	70.8364	52.0213	46.8722	42.2118
ENSRNOG00000047934	RGD1566359	51.8653	51.879	52.4379	51.0828	58.0673	55.9084	54.5197	60.4122	58.5249
ENSRNOG00000035568	Mir3074	35.0631	44.3057	49.2715	71.1691	52.6956	64.5929	58.7452	52.5908	64.8924
ENSRNOG00000061058	Csde1	41.5716	43.6742	42.44	52.8803	58.6085	54.6066	61.881	67.4441	69.9824
ENSRNOG00000021220	Cpxm1	64.0168	68.3882	67.9886	62.2908	63.6101	61.5564	36.905	33.818	34.5019
ENSRNOG00000016315	Cnpy3	64.6144	61.9281	64.4754	53.2124	48.5339	51.4495	52.5888	48.8222	47.4002
ENSRNOG00000009401	Lmo2	63.7318	62.6342	57.4291	55.4384	52.9021	57.2023	49.7075	48.5359	45.0968
ENSRNOG00000007302	Fbn1	42.977	42.7966	41.8217	79.4132	78.0697	77.0904	42.6023	43.5237	44.3006
ENSRNOG00000049056	-	33.4145	32.3566	33.2684	53.3273	48.9584	50.7938	82.8738	77.5038	79.9625
ENSRNOG00000010666	Wisp2	41.9564	38.3463	40.875	69.8147	66.6067	67.7518	56.5321	54.5117	55.7075
ENSRNOG00000015999	Cirbp	51.7421	50.7424	49.8895	60.5004	55.6583	60.1356	54.5282	54.4045	54.0292
ENSRNOG00000002575	Sap30l	52.6631	49.6788	53.2966	61.345	63.4408	62.5714	50.2919	49.253	48.922
ENSRNOG00000021233	Itpa	57.8942	56.2828	58.3763	49.5605	54.4005	52.3158	54.2529	54.6006	53.5138
ENSRNOG00000001235	Gna12	62.7504	64.0991	61.7397	55.1468	51.6677	51.4723	46.4716	48.3725	49.4762
ENSRNOG00000013889	Tmed3	53.3827	56.2526	52.8441	66.0806	63.0694	65.9243	45.8594	44.235	43.5274
ENSRNOG00000055241	AABR07053500.1	70.7234	61.7672	75.6059	41.3289	40.8304	46.6655	57.8374	55.0799	40.0152
ENSRNOG00000018761	Eif3c	63.4443	63.0586	62.4052	50.8881	49.0945	50.3595	49.0124	51.0399	50.5161
ENSRNOG00000004259	Dohh	60.5491	55.6706	65.3713	47.491	46.4228	46.3082	59.0951	56.5254	52.3517
ENSRNOG00000010319	Lcp1	78.0798	77.1436	77.1205	41.5895	42.677	42.3575	42.4154	43.6302	44.6866
ENSRNOG00000001963	Mx2	27.8883	28.3668	29.4995	94.4085	94.8657	98.9831	38.1402	37.0169	40.1921
ENSRNOG00000001182	Ndufv3	48.1084	48.1584	48.0402	56.67	51.3817	55.3863	62.3933	59.3058	59.817
ENSRNOG00000057601	AABR07044080.2	65.6738	59.6616	62.3139	57.7966	52.9267	54.8814	45.6907	42.9411	47.2498
ENSRNOG00000036691	Mcrip1	61.1432	59.3173	59.0444	55.8575	54.3652	58.8846	47.8361	45.131	47.3698
ENSRNOG00000019211	Olfml3	59.1167	58.0352	59.1627	68.1213	72.8173	67.8797	32.6139	34.5191	36.5477
ENSRNOG00000009252	Poldip2	50.8405	52.3423	51.458	54.8405	52.0474	50.4778	60.1479	61.72	54.8005
ENSRNOG00000000996	Arpc1a	55.2233	52.3218	52.1075	55.6993	55.8923	54.7236	55.8748	54.1836	52.1216
ENSRNOG00000019741	Isyna1	60.65	56.3696	60.718	48.6813	42.1122	46.2063	60.2749	58.2881	54.3435
ENSRNOG00000050110	Stfa2	48.7056	58.4275	50.0188	83.9391	99.6639	42.8232	49.1931	28.1489	26.4911
ENSRNOG00000005157	Rbbp7	54.6483	54.0946	54.3917	52.8161	54.7014	56.0384	55.7804	50.694	54.168
ENSRNOG00000007971	Wbp2	54.1959	57.8664	51.8644	48.2883	44.5344	48.7168	64.3012	59.9388	57.1466
ENSRNOG00000009823	Naa38	53.6691	58.7407	53.1447	57.6617	48.6817	51.4365	59.1583	53.3543	50.6561
ENSRNOG00000008288	Akirin2	49.3722	58.3146	53.4727	54.2091	52.1987	51.0788	57.8402	57.2447	52.4426
ENSRNOG00000008578	Cdk16	52.8345	51.297	52.7865	57.5191	54.7775	56.1942	53.3086	54.1651	53.2774
ENSRNOG00000061108	Arcn1	58.8713	61.1934	59.479	53.4305	57.0929	55.0966	44.0212	47.8775	48.455
ENSRNOG00000020557	Ryr1	18.8249	18.5907	19.9386	50.6129	50.6047	50.7564	88.2114	94.752	92.9918
ENSRNOG00000020594	Rhbdf1	48.0548	44.6571	49.683	55.914	54.8204	55.5173	64.2369	57.3367	54.1876
ENSRNOG00000019266	Tmem223	53.626	52.37	54.3369	54.8804	53.8654	51.6476	53.3262	53.3565	56.7782
ENSRNOG00000003890	Nap1l1	52.9909	57.6191	54.542	51.3487	55.3156	52.5977	53.2195	50.9263	55.5004
ENSRNOG00000018642	Leng8	49.1345	47.121	48.3161	57.0973	53.078	56.4319	59.1569	57.3408	56.0735
ENSRNOG00000053456	Lage3	48.1149	53.9909	46.9438	52.6085	55.0286	56.7608	58.4289	54.4753	57.3518
ENSRNOG00000020238	Plekhh3	52.8832	50.4038	50.0009	46.6071	41.567	45.0789	72.8511	64.3909	59.4031
ENSRNOG00000059463	Slc39a1	62.3354	60.2502	63.1713	55.8746	52.6916	50.5033	45.734	46.7106	45.7403
ENSRNOG00000017552	Mrpl34	51.3183	49.6217	51.0734	61.3964	50.9567	54.8849	56.9962	55.6598	51.0261
ENSRNOG00000013977	Bzw1	59.2908	59.8346	59.1026	50.6491	50.6128	47.2873	49.5218	54.0681	52.3928
ENSRNOG00000021719	Slfn5	45.7578	48.3806	47.8926	68.5618	72.2077	72.4529	40.5624	43.9881	42.8869
ENSRNOG00000011876	Fxr2	51.0677	50.6864	52.3674	51.6894	53.3456	53.9968	58.3559	54.8295	56.0136
ENSRNOG00000030021	Ccl6	34.2174	37.0845	33.4238	71.5264	76.9512	75.7729	49.6812	49.4663	54.1871
ENSRNOG00000035620	Mir22	41.1267	44.6449	57.6221	70.3436	67.1759	64.5311	46.3778	41.001	49.4506
ENSRNOG00000013927	Jag2	51.2169	44.4334	50.1758	48.6815	44.1374	46.1872	67.6153	66.8062	62.5159
ENSRNOG00000026120	Fam8a1	53.5033	51.3072	57.1674	46.0112	49.0253	50.6067	56.253	64.2707	53.5742
ENSRNOG00000005804	Eif3d	60.6134	58.3466	56.0399	49.5925	47.115	52.1232	53.1622	51.6223	52.9144
ENSRNOG00000006108	Gngt2	77.9963	82.2076	78.4407	39.8021	35.8883	38.2933	42.5658	42.5728	42.8915
ENSRNOG00000060753	Esyt1	68.7415	64.4368	67.8208	47.3439	45.6971	45.883	48.1998	45.9719	46.5238
ENSRNOG00000004346	Notch3	67.6016	57.6257	63.719	53.0803	47.5818	52.061	48.4067	47.0564	43.3711
ENSRNOG00000034161	Cox6b1	55.3871	55.521	49.1858	55.6785	49.3165	52.8487	58.07	48.4481	55.9977
ENSRNOG00000018255	Clptm1	56.7723	53.7779	56.7407	52.0227	48.9117	50.7417	55.4949	51.6049	54.2288
ENSRNOG00000045558	Cd34	53.0024	56.3336	53.1971	64.8897	60.9845	66.1583	39.0857	42.4901	43.6575
ENSRNOG00000018818	Txnl1	49.0347	50.4976	50.4924	55.8409	53.5105	51.6513	54.2195	55.6406	58.3839
ENSRNOG00000019050	Ifit1	31.1732	30.3362	29.914	98.1233	101.993	108.074	25.7081	25.7959	27.8795
ENSRNOG00000051499	Tcf3	60.4538	56.3713	59.9495	51.643	47.0822	53.4043	52.8591	50.5905	46.6108
ENSRNOG00000053196	Slc48a1	52.3459	51.5336	53.8503	54.4397	48.2205	50.8712	55.9785	56.7421	54.3715
ENSRNOG00000007316	Idh3B	46.8273	47.2112	43.5862	57.1924	54.3696	51.8662	60.9686	56.8255	59.1109
ENSRNOG00000057880	Myh11	44.2871	44.3668	44.0283	54.4315	53.9611	55.865	59.6492	60.3052	60.7319
ENSRNOG00000019212	Tpp1	65.0118	66.2995	69.5075	42.6012	41.6018	42.1292	52.728	49.2287	47.4718
ENSRNOG00000007793	Pnrc1	55.9766	52.7596	53.1674	46.5802	45.2142	47.2684	59.5844	61.6049	54.202
ENSRNOG00000018836	RGD1559896	63.6368	59.9896	65.1581	53.6397	52.1837	55.3931	42.2274	42.8051	40.8844
ENSRNOG00000011905	Atp6v1e1	67.5145	67.9791	68.3157	43.1148	41.608	42.6046	49.1235	46.8655	48.1656
ENSRNOG00000018647	Mrpl20	54.822	53.8617	52.8473	56.1813	51.9447	51.665	50.7732	50.8726	51.8915
ENSRNOG00000002125	Ccni	48.0273	47.1736	47.1557	55.499	60.096	56.806	51.9931	55.6476	52.3915
ENSRNOG00000060614	Pxdn	57.8804	54.3483	58.6694	65.1044	62.6298	62.3133	37.2276	38.3721	38.2367
ENSRNOG00000010402	Hspb2	23.7221	25.2149	26.2071	65.3058	62.9483	64.5929	75.4378	65.2936	65.6903
ENSRNOG00000048213	Rn50_X_0744.1	57.3421	43.7402	57.3006	53.0368	48.8355	48.5104	61.814	53.5018	50.2856
ENSRNOG00000007387	Per1	47.1372	41.2447	42.2579	51.9234	52.1322	53.7624	64.0263	62.4457	58.7971
ENSRNOG00000047557	LOC103690996	95.4271	0	1.45476	13.3787	135.449	63.0058	26.4618	74.42	64.1251
ENSRNOG00000009355	Ogfr	45.8096	38.9966	42.2875	67.952	64.5445	69.2111	50.998	48.2912	45.1732
ENSRNOG00000024036	Fam98c	50.5954	46.466	53.1007	55.9206	51.3974	56.7218	55.3196	51.2905	52.239
ENSRNOG00000014371	Cdh13	46.1207	45.0332	47.2197	61.3247	60.9531	62.8086	50.7437	48.8457	49.6031
ENSRNOG00000019891	Sgta	51.0499	51.6218	51.6606	51.4174	51.7085	50.9728	56.9963	53.0895	53.7373
novel.191	-	65.1173	68.9671	66.4298	53.2994	52.4759	55.5958	35.0435	38.7051	36.4116
ENSRNOG00000019152	Trpc4ap	50.3546	45.2708	46.0713	53.1717	50.815	55.7726	57.2135	57.0251	56.1283
ENSRNOG00000013618	Ankrd10	48.5771	46.5398	45.0275	59.4964	55.9457	57.3798	55.1678	49.2587	54.1066
ENSRNOG00000007290	Atp1a2	23.1364	24.9387	25.1286	47.8655	46.8685	47.7164	84.0281	87.274	84.1247
ENSRNOG00000011214	Polr2f	48.3966	52.7057	51.6111	48.7228	51.0634	50.0672	60.7127	54.1999	52.9017
ENSRNOG00000007968	RGD1305350	59.9833	59.7056	62.2108	49.0887	46.5858	47.1898	50.6669	52.2485	42.6673
ENSRNOG00000019422	Egr1	63.2241	60.2238	61.5835	50.3765	53.3739	53.693	43.8431	42.7979	40.7516
ENSRNOG00000003026	Rad23a	42.1156	40.2234	42.3277	55.5106	50.0127	55.4452	61.6678	61.3656	60.8798
ENSRNOG00000001821	Adipoq	23.4729	23.0541	23.2357	55.9501	50.1568	55.3369	77.0112	81.0631	80.2668
ENSRNOG00000003720	Prrx1	51.8974	52.3461	51.7029	65.3424	68.3244	65.9689	38.0276	35.8875	39.9108
ENSRNOG00000013946	Rnf149	77.3164	78.8898	80.2893	36.6111	34.1837	33.8053	44.7653	42.6834	40.8453
ENSRNOG00000007281	Flnc	27.4483	26.3972	27.933	65.0631	60.8709	63.2407	66.5258	66.3224	65.233
ENSRNOG00000021006	Tmem147	44.6326	46.5976	47.8872	52.4279	48.3077	51.3318	64.4781	54.5712	58.4032
ENSRNOG00000026415	Col14a1	57.5233	54.3777	57.1425	60.1183	60.1685	58.639	40.778	39.7514	39.9888
ENSRNOG00000005331	Vapb	51.8038	51.4537	50.7969	51.9095	54.9582	50.5486	50.4804	53.3653	52.7838
ENSRNOG00000000473	Pfdn6	48.4273	52.7839	50.0565	51.9665	51.1899	51.3022	60.0493	50.2417	52.0494
ENSRNOG00000014969	Lzts2	49.1397	46.8939	48.6019	57.8373	52.6669	54.4432	56.8233	51.095	50.1607
ENSRNOG00000006380	Srsf6	52.5498	52.0482	53.3939	53.7464	54.8829	55.2708	46.8724	47.918	50.816
ENSRNOG00000056397	SNORD22	52.714	46.2836	52.6726	44.6183	54.9408	61.2374	57.3465	50.1784	47.4526
ENSRNOG00000030830	Mex3d	72.3464	53.3652	67.1434	50.2951	46.8866	49.1314	47.2202	44.1799	36.1122
ENSRNOG00000024170	Phf5a	50.7213	51.6865	54.3809	49.6955	52.1619	48.9744	54.3713	49.7904	54.5732
ENSRNOG00000011952	Samm50	48.2077	51.1528	50.665	53.7318	50.9901	53.2264	53.8818	53.1558	51.3245
ENSRNOG00000007284	Slc2a1	78.5075	76.2692	76.403	33.5777	36.5139	35.6403	43.8776	42.9043	42.5645
ENSRNOG00000003763	Prdx4	46.1636	55.724	51.9685	58.8843	59.747	59.6078	46.1801	43.6295	44.2612
ENSRNOG00000017781	Dnajc7	48.0973	49.1325	47.5791	54.3143	56.6634	56.3845	51.6444	51.1128	50.9449
ENSRNOG00000021638	Eef1d	48.9429	48.451	49.8845	55.3771	51.9909	51.198	54.3473	52.4765	53.0048
ENSRNOG00000010218	NEWGENE_619861	51.8337	54.6376	50.6824	52.3408	53.6811	52.894	47.7001	49.944	51.8526
ENSRNOG00000015936	LOC108349548	50.1585	52.0135	51.5733	50.9808	53.5388	55.9597	50.3952	49.1563	51.7448
ENSRNOG00000009155	Ndufs3	42.6567	45.6746	41.3408	51.8405	50.5243	50.0175	59.2973	59.3687	64.7121
ENSRNOG00000021041	Fam171a2	48.2116	44.9492	44.5977	64.5292	56.8642	63.5512	51.06	47.6024	43.8778
ENSRNOG00000001325	Il3ra	45.6238	46.4785	49.79	58.3292	53.003	52.9617	57.6565	51.9443	49.4143
ENSRNOG00000015068	Il11ra1	47.9731	42.469	45.5871	57.4334	52.3143	52.5711	55.7959	55.495	55.3752
ENSRNOG00000006500	Snf8	50.9771	56.0857	48.5513	55.2221	50.0472	51.3186	51.2876	50.9817	50.3589
ENSRNOG00000010628	Sec13	58.1276	63.2767	59.6844	50.9857	50.7956	52.6402	44.0473	41.3021	43.8197
ENSRNOG00000010543	Srpra	51.9445	55.3122	52.4903	48.3022	51.9341	51.2689	50.1812	51.9199	50.9503
ENSRNOG00000018107	Zfand5	40.2471	42.1152	42.8928	48.8127	50.6313	49.8211	59.6481	61.4726	68.6482
ENSRNOG00000019018	Plat	52.2065	49.3358	53.8366	61.2573	58.4438	60.6243	41.5746	42.0826	43.8684
ENSRNOG00000006394	Tbc1d10a	61.1708	57.2378	59.0703	46.9575	44.6411	47.4873	52.6307	48.7157	44.5454
ENSRNOG00000033623	Pigx	56.314	56.0492	56.0424	49.4792	49.2824	52.1943	45.7109	48.8191	47.5016
ENSRNOG00000007300	C1qtnf6	70.0131	71.2398	75.0497	55.1826	54.3741	54.2564	27.2731	26.2269	27.774
ENSRNOG00000007350	Rac2	76.8307	72.9194	74.8703	37.4217	37.127	38.2203	43.3041	40.618	39.2651
ENSRNOG00000011979	Mrps24	47.6685	50.3089	46.6206	52.0088	52.294	51.8846	54.3912	55.099	50.2662
ENSRNOG00000019228	Pik3r2	55.2586	52.0898	56.2604	52.5936	47.3025	52.6109	51.5696	46.3437	46.4001
ENSRNOG00000004608	Pam16	37.6732	47.0574	46.5873	53.0368	51.1814	52.545	54.0186	57.6403	60.2702
ENSRNOG00000050646	Fem1a	37.0234	33.7605	35.4442	48.011	46.1486	49.0205	72.0465	73.3216	65.1365
ENSRNOG00000020615	Nap1l4	46.0751	44.1414	46.8834	53.2907	53.3292	52.8027	53.9648	54.5101	54.5973
ENSRNOG00000027797	Nit2	49.218	52.4886	50.0927	51.2311	51.8727	50.8438	52.4021	50.8496	50.176
ENSRNOG00000015295	Ctdsp1	46.6713	46.8459	44.5055	54.6737	52.5175	54.5089	52.3025	52.7641	54.3175
ENSRNOG00000010960	Ankh	83.6767	83.7545	84.4406	30.5782	31.115	29.3293	37.2898	40.5222	38.2364
ENSRNOG00000009248	Pnrc2	51.1462	54.1532	50.8159	51.2805	54.3094	51.912	45.5111	48.3675	50.1528
ENSRNOG00000005434	Sptbn1	46.0426	45.9849	45.3923	53.728	52.5333	53.6737	51.0422	55.0101	53.8165
ENSRNOG00000031135	Smarcc2	50.8637	48.5383	49.9912	50.3761	48.3073	48.4792	56.292	52.5903	51.5887
ENSRNOG00000018207	Dynlt1	52.1653	57.6135	54.1583	53.7644	52.0051	52.7762	51.1704	40.0343	43.2216
ENSRNOG00000026884	Snx17	52.0438	50.3758	52.8812	53.6187	53.7263	50.9644	50.5602	46.9752	45.3181
ENSRNOG00000016530	Nsa2	42.8957	45.2997	43.7004	51.9277	56.1901	54.3558	55.4506	51.7823	54.805
ENSRNOG00000061910	Igfbp3	63.9269	63.0179	61.8071	52.3097	49.2066	49.2259	38.293	40.5732	38.0291
ENSRNOG00000043471	Krtap8-1	143.188	149.166	150.539	5.70289	3.48918	3.69373	0	0	0
ENSRNOG00000060649	SNORD24	72.2643	67.5269	69.7112	45.2753	33.6366	32.8693	44.4171	45.4359	44.5591
ENSRNOG00000020748	Map4	47.3481	46.8589	47.3486	52.3722	54.6632	54.6226	50.3258	51.8781	50.0328
ENSRNOG00000018796	Herpud1	34.7151	34.1222	35.1096	55.9161	53.9649	58.3287	63.5609	61.1396	58.3239
ENSRNOG00000005615	Gadd45a	42.8693	43.7645	45.2034	51.712	50.2473	53.0191	58.3192	56.2233	53.6088
ENSRNOG00000019246	Psme2	43.9468	46.183	47.7555	58.071	60.5091	59.8004	51.8082	43.3717	43.3031
ENSRNOG00000011984	Cxcl14	57.5633	55.6541	59.6226	33.3619	32.3756	34.5549	59.3283	62.7892	59.2569
ENSRNOG00000047185	-	50.5378	53.761	50.4376	53.8356	53.7022	52.4242	42.5254	50.953	46.3091
ENSRNOG00000018524	Ezr	58.2396	54.7786	58.2994	43.9161	44.1593	45.3168	52.4809	49.2654	47.9184
ENSRNOG00000060597	Syf2	44.8356	45.868	47.8496	48.6394	55.0181	50.1815	55.4839	53.6424	52.7555
ENSRNOG00000020601	Hmg20b	58.318	55.7783	52.3744	50.6318	47.2736	48.0558	49.9825	47.3229	44.2249
ENSRNOG00000001783	Tra2b	54.3847	58.1938	57.551	44.6162	51.2201	48.1073	46.9014	45.0411	47.9309
ENSRNOG00000019229	Fbl	58.611	64.1436	62.677	42.7977	43.6414	37.9473	52.8259	44.2619	46.9704
ENSRNOG00000060956	Zfp706	55.097	57.1603	57.4394	44.1588	45.5715	45.085	48.9117	50.0034	50.2244
ENSRNOG00000001163	Srsf9	56.2646	60.3038	53.4822	45.3426	52.2072	52.8969	46.9533	41.9775	44.2054
ENSRNOG00000016294	Cd4	69.4361	65.8445	67.2779	41.6956	44.5893	43.6025	42.4215	39.6672	39.0962
ENSRNOG00000012827	Mlf1	25.0046	30.5127	27.6633	36.9159	41.2426	37.8781	81.5142	86.9605	85.6024
ENSRNOG00000050570	Nrbp1	51.6658	48.5909	52.0369	56.1244	51.8733	54.5359	45.3414	46.2472	46.4946
ENSRNOG00000039666	Srpx	50.8807	49.5137	53.009	59.0816	56.8976	59.2195	42.0068	38.8814	43.2924
ENSRNOG00000046276	Myh3	14.6851	14.2117	15.5003	101.724	97.5185	103.018	34.8772	37.1536	33.8891
ENSRNOG00000001192	Gltp	61.9976	62.5501	59.7243	43.806	42.3082	46.2466	46.0628	43.2024	46.5893
ENSRNOG00000011857	Mtpn	70.5271	68.9636	67.0528	41.6371	40.7679	39.7171	39.6709	42.1229	41.9189
ENSRNOG00000015182	Ppp2cb	53.6961	54.5953	51.7443	51.598	48.8276	50.1146	46.1066	47.3687	48.201
ENSRNOG00000045543	Frat2	46.5123	39.3559	48.3735	33.1385	32.1528	29.6654	83.1588	78.6889	60.4627
ENSRNOG00000011814	Cbx3	48.6701	50.7756	51.7728	50.3637	51.6353	50.8207	47.2048	47.0746	53.1871
ENSRNOG00000001228	Pofut2	57.219	52.8306	57.2786	58.1316	55.7582	57.5277	38.1493	37.209	37.2016
ENSRNOG00000045636	Fasn	43.5991	41.4517	42.9041	35.7138	35.3941	34.1762	73.9538	74.3267	69.0111
ENSRNOG00000023480	Nabp2	51.5381	54.2036	50.5438	46.2475	46.8242	51.0301	50.74	48.4085	50.3918
ENSRNOG00000001376	Mettl7a	30.9279	30.0996	31.5959	49.5747	48.7867	48.6851	70.7455	69.3483	70.1508
ENSRNOG00000014327	Csrp3	17.8146	19.008	15.0276	104.255	94.9708	94.9877	40.8423	32.9112	30.0693
ENSRNOG00000026636	Urm1	56.3826	51.7146	54.7858	45.5819	40.7464	43.8496	56.8106	51.0097	48.9009
ENSRNOG00000045885	LOC100365810	37.8255	41.1479	40.4882	65.7761	69.5912	45.595	51.834	46.7655	50.7091
ENSRNOG00000042274	Fbxo31	37.6446	39.089	39.8154	49.0619	53.8546	51.3801	65.201	65.5541	48.072
ENSRNOG00000000579	Marcks	51.8601	57.9199	55.7447	57.427	59.4517	55.8199	37.2568	37.3277	36.6679
ENSRNOG00000001009	Bri3	53.1407	46.3675	52.0572	55.5267	50.7435	54.2082	49.5651	43.7811	44.0043
ENSRNOG00000029875	Mrpl41	47.5679	53.3082	49.3367	44.0845	52.0878	43.5534	55.4121	54.6091	49.2699
ENSRNOG00000038489	Sumo3	50.3009	50.0085	48.289	51.1777	52.3589	50.9288	49.2726	46.2327	50.356
ENSRNOG00000036742	Uqcrc2	42.8046	42.1775	41.4319	53.6184	50.0499	51.3421	54.7516	56.4507	56.0638
ENSRNOG00000008921	Dynll2	46.6445	49.1183	47.4633	43.1966	46.0037	40.9959	60.6165	56.6208	57.8705
ENSRNOG00000002217	LOC100910270	21.5873	32.5472	36.8117	70.0405	75.1102	84.5724	45.6017	33.7318	48.3589
ENSRNOG00000011146	Gyg1	30.4952	29.6679	29.9137	61.0087	55.6293	59.6364	60.3267	59.87	61.6112
ENSRNOG00000048981	Ahsa1	50.6988	48.9969	51.0554	45.678	44.5178	48.0996	51.3123	52.7983	54.8894
ENSRNOG00000012110	Col17a1	45.0315	43.2426	44.8016	52.3675	50.8649	52.1437	51.9461	54.6494	52.9789
ENSRNOG00000017692	Ppp1r37	54.3273	48.8242	51.9945	46.2015	45.9506	46.4701	54.2987	51.0424	48.2615
ENSRNOG00000031052	LOC100362751	41.1661	43.3334	37.5854	62.9431	55.9472	55.5823	51.1488	50.611	48.8162
ENSRNOG00000020178	Cope	57.2466	51.2329	56.3708	51.6447	50.5948	50.0231	44.7918	42.6947	42.5013
ENSRNOG00000007845	Supt4h1	44.8697	49.0133	44.7706	52.2225	50.3973	53.2038	54.0659	47.6201	50.9136
ENSRNOG00000048277	AABR07035787.1	46.4237	45.402	48.0809	52.64	54.1559	54.2149	49.4738	48.5015	48.0014
ENSRNOG00000037931	Plaur	67.7855	62.0672	67.868	47.1381	47.4342	51.6629	36.6799	32.7689	33.4714
ENSRNOG00000020607	Bckdha	38.8437	34.2689	39.3986	50.3794	45.9243	50.2565	63.6406	63.0009	60.442
ENSRNOG00000033663	P4ha2	55.6121	51.3251	52.1284	59.2521	55.7724	55.6302	40.4356	38.2064	37.7552
ENSRNOG00000047853	Ss18l2	40.7389	48.811	38.3678	50.7424	56.242	54.0798	57.8655	48.9365	50.295
ENSRNOG00000009934	Emc3	48.2153	51.0963	49.8021	51.982	50.4695	52.0402	47.3916	46.5193	48.2995
ENSRNOG00000056940	Cited2	45.8727	46.8471	45.8087	43.703	42.0671	47.4256	60.8551	58.2175	54.635
ENSRNOG00000032708	RT1-Bb	66.7902	65.1492	65.401	51.3598	54.0289	48.5143	33.8859	31.2794	29.0014
ENSRNOG00000001204	Ankrd13a	60.2142	56.802	55.2992	47.1341	46.1461	47.5769	45.314	44.8162	41.9236
ENSRNOG00000003583	Smyd2	35.6801	33.96	35.1253	48.7939	48.5196	49.4261	64.8249	66.1638	62.6374
ENSRNOG00000018686	Atxn2l	54.9786	52.3958	54.7418	45.0102	44.2604	46.5592	50.9053	49.5772	46.5712
ENSRNOG00000000021	AABR07061902.1	55.0241	52.4267	58.455	44.5067	46.3756	44.9655	51.8916	47.5597	43.4191
ENSRNOG00000043377	Fdps	47.6647	47.266	45.9175	39.051	41.7966	41.4576	62.0619	58.9255	60.4228
ENSRNOG00000011352	Furin	55.2672	52.0266	55.0442	51.1587	46.4976	49.0933	44.9131	46.0449	43.9693
ENSRNOG00000042037	Smim7	51.0982	49.4409	50.3706	52.9541	51.2137	52.3953	46.8312	44.6938	45.0096
ENSRNOG00000016099	Id4	48.4975	51.2986	50.6481	40.0549	41.6427	36.7601	60.6961	64.2622	50.1083
ENSRNOG00000006247	Copa	54.3917	53.5501	53.9086	51.4453	51.3977	52.2287	40.6127	42.7456	43.5446
ENSRNOG00000014426	Lox	58.4389	60.6343	60.9901	58.4983	61.3391	58.4008	26.9957	28.7362	29.6245
ENSRNOG00000013533	Acin1	47.789	45.0424	46.609	51.3836	53.4035	51.4225	51.0641	48.9515	47.8199
ENSRNOG00000011798	Mapre1	58.2299	63.7209	58.437	44.7151	45.8565	46.4274	41.6197	40.907	43.2839
ENSRNOG00000013520	Mat2a	47.6995	48.0793	49.2976	46.5856	48.7	48.6632	49.1065	52.2161	52.785
ENSRNOG00000025792	Crk	56.6463	53.359	56.3304	53.8411	46.4426	48.8418	42.9454	43.3404	41.1281
ENSRNOG00000016758	Loxl2	63.1484	63.2019	64.5338	52.9897	54.9961	57.572	28.7065	28.0873	29.6025
ENSRNOG00000015239	Ginm1	50.7163	55.2248	52.4415	47.2997	46.3687	42.6008	48.8602	49.5301	49.772
ENSRNOG00000008764	Otud5	46.2065	45.1481	47.3319	51.7654	49.4705	50.5502	51.3819	51.3083	49.4189
ENSRNOG00000016810	Stmn1	52.8113	53.9083	52.6338	36.6144	38.9154	35.3198	56.8356	59.3432	56.0019
novel.1095	-	40.0722	51.0363	41.2848	54.7546	60.9247	51.458	46.6156	49.4229	46.54
ENSRNOG00000001862	Ube2l3	49.8465	52.9284	49.1983	49.0455	50.1767	47.5056	48.5413	47.4392	47.3624
ENSRNOG00000045892	Cfl2	28.0601	28.8085	27.4358	61.9247	66.9371	64.38	52.6175	54.6552	56.9139
ENSRNOG00000012121	Sdf2	48.3994	46.1636	46.0635	51.4819	51.8967	51.383	50.4594	48.7569	46.3998
ENSRNOG00000010117	Eif3a	54.1013	55.3433	54.6536	45.1305	48.7849	45.7335	43.4886	45.6893	47.9803
ENSRNOG00000000697	Coro1c	60.6705	58.5956	59.8018	45.7777	44.6195	44.3762	42.7848	42.2553	41.9174
ENSRNOG00000016512	Sema3b	32.2604	32.7962	35.7297	48.2211	46.4794	50.3231	69.1326	65.4657	59.7929
ENSRNOG00000020905	Hdac5	46.7662	42.567	44.5097	48.0426	46.554	49.0622	56.1998	53.9277	52.3905
ENSRNOG00000010067	Lypla2	59.7367	56.6452	57.0479	44.7207	39.6557	43.7369	48.2345	45.0651	45.1679
ENSRNOG00000003524	Lrrc59	59.075	57.5609	60.1134	48.6076	45.7055	50.227	37.8636	42.1265	38.5446
ENSRNOG00000020164	Ifitm10	30.0186	24.5652	29.3409	48.3726	53.0084	50.3	69.2443	67.1003	65.9625
ENSRNOG00000020657	Shc1	55.1432	54.7184	55.6108	49.6156	48.1441	50.7162	41.0716	41.2959	41.4217
ENSRNOG00000010186	Cdv3	54.3685	55.5145	52.6896	48.9988	47.7502	50.2114	41.5689	42.9069	42.9897
ENSRNOG00000019451	Smtn	52.909	51.1223	52.1056	47.151	47.0338	48.0385	45.5999	47.1305	45.6589
ENSRNOG00000021153	Fkbp2	49.9952	49.3213	48.7495	53.7909	50.0667	46.6705	52.8057	43.5197	41.6803
ENSRNOG00000059659	Zfand3	45.9089	44.8735	47.6391	46.484	48.1312	46.1355	52.417	50.5005	52.3994
ENSRNOG00000019124	Elovl3	28.8313	29.253	30.7931	37.5943	37.7983	37.1295	78.3065	76.3103	78.236
ENSRNOG00000014581	Trappc2l	54.1732	51.4812	51.0488	47.332	47.7197	46.9865	45.0215	45.8247	44.6613
ENSRNOG00000050543	Safb	47.1165	43.6392	44.2481	49.2259	47.0399	49.0347	51.7407	52.2705	49.6711
ENSRNOG00000000467	Ring1	48.8094	48.1086	51.2431	45.4823	45.3685	44.7348	53.4983	50.1894	46.483
ENSRNOG00000030126	Clk3	51.1636	49.6561	50.5565	48.2942	45.737	46.221	48.7515	46.6319	46.7022
ENSRNOG00000008843	Eci1	34.6355	33.8755	35.2272	53.8696	52.7555	48.6997	60.1288	57.5587	56.9524
ENSRNOG00000011413	Podn	41.43	41.549	43.0471	51.664	50.9201	51.1999	52.2692	49.9537	51.3457
ENSRNOG00000059801	Lima1	55.3212	54.5635	55.9981	50.966	51.7595	54.4995	36.2941	36.5361	37.0226
ENSRNOG00000016265	Acsl5	47.3315	47.3797	45.8168	40.583	44.6901	41.7102	54.4106	55.0699	55.9062
ENSRNOG00000017829	Ssu72	42.0941	47.6132	42.5163	48.847	52.8319	45.6189	51.1049	50.686	51.4298
ENSRNOG00000024243	Cadm4	24.2603	22.4386	22.8048	32.6494	32.6151	34.1529	93.845	89.1575	80.6297
ENSRNOG00000014690	Pigt	52.4686	49.5831	50.6165	48.5479	50.5348	48.3533	45.7183	43.7654	42.6933
ENSRNOG00000020298	Bag3	42.6954	41.611	41.5315	49.5594	45.8306	47.9888	56.6134	54.0297	52.0902
ENSRNOG00000022802	Tmem184b	53.3202	47.3012	52.3102	53.3381	47.9708	53.0541	43.273	42.4773	38.8558
ENSRNOG00000018114	Acadvl	40.0331	36.5393	38.2787	49.3355	47.1296	46.9039	59.3116	58.1873	56.1021
ENSRNOG00000036604	Ifit2	24.1444	22.4809	22.1257	88.6333	93.4423	92.4892	29.4501	28.3992	30.4704
novel.606	-	42.0133	45.5752	41.9546	46.0593	50.2298	47.6071	47.2725	52.3718	58.1917
ENSRNOG00000020412	Sf3b2	50.8173	52.6211	50.8776	46.2921	43.7993	45.9804	47.1383	47.9761	45.6716
ENSRNOG00000008427	Necap2	57.4281	54.0001	56.462	46.5226	43.1917	46.4133	43.0757	42.2562	41.7243
ENSRNOG00000008364	Cat	31.9816	34.8937	33.3513	44.3053	41.9623	44.9391	64.0205	68.6346	66.9083
ENSRNOG00000007584	Ehd4	53.8718	53.4419	55.1842	49.958	49.2073	49.4262	36.8443	40.2467	41.0988
ENSRNOG00000014170	Dbn1	50.6243	48.4382	49.0285	57.3925	56.7137	56.6783	38.1702	36.5819	35.4503
ENSRNOG00000009811	Cnih1	46.6802	49.2181	50.7967	51.6382	51.0048	52.372	39.9109	43.8756	43.5339
ENSRNOG00000003269	Atp6v0e1	62.1459	61.4422	60.2467	35.0002	36.9473	39.3124	46.9608	42.5993	43.837
ENSRNOG00000003653	Fh	45.7503	48.7732	46.2761	42.7436	41.746	44.5235	52.4524	52.7869	53.1636
ENSRNOG00000021164	Stip1	50.3024	54.2522	48.7431	42.6617	43.4255	42.7116	50.0495	46.6168	49.3046
ENSRNOG00000010176	Map2k1	49.8452	48.6771	49.5554	46.0235	45.7433	43.5132	48.3094	48.5916	47.1684
ENSRNOG00000007040	Timm17a	46.3888	45.2224	46.0855	47.2286	44.8692	46.0673	52.1819	51.58	47.7675
ENSRNOG00000010386	H2afx	62.1307	60.8109	60.3175	38.1227	35.9464	38.067	44.081	44.8635	42.743
ENSRNOG00000001396	Mospd3	52.8469	52.2112	52.9835	46.6915	47.3962	47.3689	46.0942	41.4797	39.8829
ENSRNOG00000019254	Dyrk1b	32.0102	27.8433	34.6048	44.7413	40.7709	46.6718	72.9014	66.464	60.9266
ENSRNOG00000026905	Ppm1g	52.2445	51.4613	52.1439	47.4139	48.1233	46.4139	43.4878	42.0767	43.5421
ENSRNOG00000017539	Mmp9	102.513	100.141	99.7473	19.5647	19.7787	20.8878	22.2299	20.3939	21.1654
ENSRNOG00000043201	Coq8a	19.5024	21.3396	20.6649	51.8861	47.7123	51.1697	72.9706	71.3453	69.8092
ENSRNOG00000013507	Selenot	46.9404	52.04	51.8612	46.7462	45.6216	43.9866	41.9866	48.4275	48.2774
ENSRNOG00000009663	Apex1	53.9835	53.7781	54.7885	40.0584	35.4186	40.165	49.991	48.614	48.4202
ENSRNOG00000018414	Csf1r	61.6177	61.3029	59.0761	42.3815	43.4071	42.7621	38.3275	37.6527	38.5031
ENSRNOG00000021106	Gramd1a	43.4115	42.7967	42.4841	49.1783	48.9137	51.8176	51.1107	48.2556	46.9347
ENSRNOG00000003120	Prelp	43.4593	42.8499	40.7741	51.0655	50.181	51.7574	48.7009	47.8557	48.1973
ENSRNOG00000015866	Hint2	47.3378	47.3463	45.4674	47.7875	42.9152	45.5437	48.9209	50.6708	48.6672
ENSRNOG00000053437	AC103090.1	41.0522	44.8201	47.3903	44.5817	57.2175	50.9339	40.0148	47.0423	51.5789
ENSRNOG00000012817	Lrrc17	49.8717	47.3136	49.2418	61.5721	63.5199	65.7599	30.7252	27.254	28.9132
ENSRNOG00000009183	Szrd1	49.4931	45.1887	48.3095	49.5825	45.4092	48.9845	45.2455	45.9757	45.8635
ENSRNOG00000009028	Rnf126	56.1149	50.4524	54.0244	42.7367	42.2262	45.2293	46.215	43.4065	43.2665
ENSRNOG00000003486	Mnda	39.9277	39.4802	39.5444	60.6515	69.3407	66.1355	35.0998	34.4721	38.7951
ENSRNOG00000009568	Hdac1	55.8194	54.2759	53.4082	45.9916	45.526	43.7251	40.8878	42.4363	41.3617
ENSRNOG00000002186	Nudt9	46.0449	47.1082	47.5044	49.7244	47.8704	44.4263	49.4674	47.5758	43.7054
ENSRNOG00000020182	Mvp	49.4494	49.8796	49.551	48.2586	49.1952	49.1663	44.0189	43.4981	40.3747
ENSRNOG00000018309	Chd4	49.3522	48.1343	50.4741	44.4417	46.4842	43.65	46.6018	47.8939	46.1625
ENSRNOG00000011732	Psmb7	43.3859	43.9019	47.0152	44.656	47.0988	45.0585	52.8568	50.6259	48.264
ENSRNOG00000033498	Cib1	50.1529	56.2928	55.7733	46.5807	45.9607	41.8461	44.3095	41.1018	40.4886
ENSRNOG00000010895	Tmem30a	52.2758	52.1959	54.2222	43.2616	46.5846	48.4754	42.3938	41.0413	41.7409
ENSRNOG00000016991	Arl2bp	46.3867	48.239	45.1234	50.9674	52.7837	49.3061	42.1414	42.6134	44.5565
ENSRNOG00000018338	Vwa1	45.8724	43.1718	41.829	48.7366	44.439	47.0426	53.7759	48.4458	48.4353
ENSRNOG00000018089	Sra1	44.7978	48.6945	46.808	54.6821	48.9504	48.7501	43.5229	42.5956	42.8632
ENSRNOG00000009446	Rxra	51.1425	47.4812	48.4678	39.0095	36.7814	37.5665	54.4244	54.5169	52.2576
ENSRNOG00000001106	Denr	48.1107	50.202	45.0307	45.8377	50.2724	49.0349	48.3487	45.5873	39.0546
ENSRNOG00000006148	RGD1310352	49.3648	46.6607	47.2775	49.3837	47.1481	48.748	43.3398	44.0128	45.523
ENSRNOG00000020427	Borcs8	44.8466	52.4153	48.1765	51.868	47.0799	45.2781	42.8856	44.1653	44.5767
novel.979	-	39.9398	42.4388	40.6951	47.652	47.5383	50.2761	54.7417	45.3804	52.1384
ENSRNOG00000036695	Mrpl12	48.2859	46.2432	49.0633	44.8251	47.5426	49.3999	45.5153	45.0017	44.4773
ENSRNOG00000047796	Pcbd2	37.3068	38.8107	41.631	50.9651	47.6037	48.8575	50.6371	51.0114	53.137
ENSRNOG00000019062	Pura	56.3298	55.849	61.9651	36.2143	42.168	36.3906	42.6191	47.8561	40.2827
ENSRNOG00000001285	Atp2a2	48.1396	48.1751	47.9604	51.9152	52.8324	51.6991	38.841	39.831	40.2774
ENSRNOG00000015020	Idh1	49.2373	48.2245	49.0958	41.9142	44.3792	42.7315	47.2448	48.0062	48.6623
ENSRNOG00000013794	Rbp1	51.9254	53.5744	60.415	48.4647	46.7004	47.8372	35.7029	38.2827	36.4758
ENSRNOG00000022839	Ifit3	19.4874	19.8755	17.7902	87.5043	89.5466	88.9771	33.5523	30.6959	30.7456
ENSRNOG00000016001	Chmp1a	48.7447	47.6085	48.3509	47.47	43.9677	43.7464	44.2551	46.5934	46.4112
ENSRNOG00000023020	Fdx1l	45.4385	43.7787	45.5531	46.0891	45.244	49.0102	52.6497	45.9074	43.3289
ENSRNOG00000004168	Slc35e4	53.5266	50.9503	56.2212	43.4067	38.5784	38.4311	47.3692	44.9889	43.5053
ENSRNOG00000012778	Magoh	45.6793	52.3124	46.925	41.0838	43.8309	45.4341	49.5389	46.4244	45.6111
ENSRNOG00000009760	Palm	43.4198	40.608	42.0312	54.7614	49.2824	48.6637	47.531	46.1064	44.2032
ENSRNOG00000003858	Atp6ap2	74.6714	79.4872	78.9399	26.8467	27.6487	26.8969	34.7461	33.9843	33.2668
ENSRNOG00000001004	Ncor2	46.094	42.8367	47.5731	46.5066	45.3192	47.2851	47.8284	47.9369	44.9548
ENSRNOG00000017871	Sidt2	55.4616	53.2531	52.9802	40.116	36.1271	39.1712	47.296	46.9847	44.9303
ENSRNOG00000003131	Traf7	51.0728	47.8009	50.6294	44.0114	45.1272	47.3314	43.8736	43.779	42.4986
ENSRNOG00000042189	Rab31	56.6296	56.8988	55.308	48.6924	49.6684	48.5513	32.2791	34.3767	33.6779
ENSRNOG00000038902	RGD1565641	38.4065	45.3236	36.5677	46.9865	46.6001	57.3383	51.4733	46.9966	46.3008
ENSRNOG00000017977	Smpd1	43.9379	45.4618	46.0307	49.3847	44.7368	46.9665	46.9656	46.2314	45.9112
ENSRNOG00000019511	Mrps18a	41.0885	42.3574	43.5829	48.898	47.5104	46.6035	50.1004	47.766	47.6113
ENSRNOG00000032677	Tssc4	43.4272	40.1383	41.7785	49.6188	47.0724	48.1034	52.8749	46.9264	45.2535
ENSRNOG00000014330	Pcmt1	48.7427	48.2964	47.8201	43.3599	37.573	43.268	51.3935	49.3861	45.3436
ENSRNOG00000019598	Vegfa	32.5035	32.3935	31.7765	52.4834	49.7051	50.0617	58.1157	54.5085	53.4076
ENSRNOG00000038001	Slc25a1	43.4748	42.6256	45.3927	41.6254	38.2833	41.4161	55.8336	53.7187	52.516
ENSRNOG00000053040	AC094643.2	41.7362	39.0074	38.7981	49.8333	47.0044	52.9078	48.9543	48.684	47.5057
ENSRNOG00000017956	Golga7	53.6978	54.01	51.1934	41.2628	43.3645	42.2147	44.6618	41.3724	42.1854
ENSRNOG00000001300	P2rx4	61.8449	58.8167	63.2223	35.7527	36.8693	39.1671	38.736	38.7131	40.7562
ENSRNOG00000003546	Tnfrsf12a	53.8249	50.465	47.89	51.66	46.0514	48.9523	39.4685	37.751	37.5974
ENSRNOG00000017150	Med10	50.7157	54.1066	49.0073	47.5928	45.8984	47.3122	41.2149	38.1714	39.6191
ENSRNOG00000005678	Lamb1	42.4618	41.8971	41.9042	56.034	53.0189	53.5415	41.6784	41.5005	41.5515
ENSRNOG00000005061	Dlst	48.7149	50.2792	47.7636	43.7043	42.6976	45.1468	44.3073	44.7705	46.189
ENSRNOG00000015090	Nubp2	54.8578	50.473	53.5665	42.1242	40.9314	43.4576	43.0657	43.4955	41.2735
ENSRNOG00000010077	Smarcd3	26.1559	24.0485	25.5971	53.5124	48.6191	51.2061	60.7818	61.8495	61.4359
ENSRNOG00000017641	Rnf44	50.9905	45.5792	49.8073	43.4241	40.8812	41.1046	49.8551	45.4529	46.0092
ENSRNOG00000019724	Ganab	50.7645	47.7035	50.296	45.7049	43.8388	44.5595	43.4593	42.7683	43.9703
ENSRNOG00000059270	AC119015.2	46.7681	40.2831	43.4492	46.2933	53.8965	59.2051	38.7597	43.8414	40.4407
ENSRNOG00000015812	Tm4sf1	43.4449	43.5303	43.5494	48.4131	51.1425	49.1358	43.6522	44.2631	45.5788
ENSRNOG00000008897	Gga1	47.7447	42.9114	45.3847	44.7522	41.7066	44.9407	50.3408	46.9942	47.8336
ENSRNOG00000050849	Leprot	49.3233	49.3516	48.0273	44.5145	44.7634	46.8669	42.4188	42.3594	44.839
ENSRNOG00000027811	Lilrb4	72.6426	72.9384	72.3509	28.2071	27.647	29.0419	37.0275	36.3801	36.177
ENSRNOG00000028323	Dhrsx	44.0185	43.5084	43.3487	49.3291	45.2056	47.5478	48.0318	47.4255	43.7314
ENSRNOG00000001417	Plod3	52.5437	53.5299	53.8162	45.091	46.3338	47.3332	41.5062	34.9584	36.9958
ENSRNOG00000024846	Ier5l	53.3796	56.2425	62.6987	46.6184	39.9245	40.9662	39.1011	41.0256	31.7358
ENSRNOG00000017983	Ubac1	32.5406	32.2139	30.7104	43.5943	44.8136	45.345	58.061	62.3369	61.9542
ENSRNOG00000008857	Adamts10	41.7071	37.8636	41.6761	53.4121	49.4407	53.5363	47.8436	43.604	42.3293
ENSRNOG00000055340	Ski	51.3839	42.9757	50.2511	42.4962	41.6105	45.4699	46.7006	46.8884	43.0953
ENSRNOG00000020020	Wbp1l	41.9471	41.626	41.6647	49.2333	46.893	47.4873	47.6039	48.072	46.3261
ENSRNOG00000009535	Stoml2	45.5921	45.1585	44.3253	44.4296	41.4603	44.3537	50.0742	49.7761	45.6557
ENSRNOG00000001442	Por	40.0372	39.1421	42.3433	49.6432	46.895	46.1939	50.625	49.4349	46.4989
ENSRNOG00000003973	Cyb5r1	33.5356	33.8398	35.5463	48.1469	46.2045	47.5725	57.1748	54.7569	53.9246
ENSRNOG00000019813	Ppp4c	49.4042	52.2901	49.2157	44.4664	45.1078	43.5045	40.6959	45.5287	40.4722
ENSRNOG00000000723	RT1-CE5	21.7645	25.8792	22.5422	51.1119	66.3285	56.456	61.8638	53.2092	50.9485
ENSRNOG00000000431	Atf6b	58.2025	52.6142	56.0074	38.2238	38.5186	37.3743	46.1398	43.2558	39.5364
ENSRNOG00000017197	Pdgfb	55.0144	52.4092	52.9219	43.6431	41.1867	45.4233	40.92	39.1667	39.1565
ENSRNOG00000020726	Sipa1	51.0032	43.049	49.6366	49.2101	45.7451	47.4582	43.0333	41.8923	38.5973
ENSRNOG00000018715	Clec10a	26.5802	25.6279	26.6237	64.4722	61.7293	64.2435	44.6884	46.0852	49.3956
ENSRNOG00000005397	Maea	48.7016	46.084	48.2181	44.5016	44.1211	45.6957	45.466	43.769	42.7294
ENSRNOG00000011427	Hr	57.1661	54.8032	59.4161	29.5809	28.795	28.7503	51.3777	51.2577	47.8373
novel.837	-	58.8008	59.4259	59.7212	33.3	33.7657	32.8091	39.4743	46.6938	44.9419
ENSRNOG00000001592	Cct8	47.0105	49.7235	47.4826	40.3509	44.1497	42.3251	45.7658	45.4114	46.6056
ENSRNOG00000013356	Snapin	40.3513	42.8761	41.3278	52.4108	51.3871	47.7198	43.2211	44.8274	44.2476
ENSRNOG00000014287	Stk11	45.9099	45.9504	47.993	43.8204	42.6555	44.0886	46.013	46.4058	45.2313
ENSRNOG00000031778	Mef2d	39.2166	38.4256	44.839	46.3111	41.4791	42.19	52.5051	54.0997	48.8959
ENSRNOG00000028650	Inf2	51.1747	46.7504	51.4217	41.3265	40.0883	40.7279	46.1984	45.7672	44.459
ENSRNOG00000002680	Lamc1	43.9145	42.6232	42.4102	49.5264	51.3593	49.4741	41.8699	43.7545	41.9146
ENSRNOG00000020426	Erf	52.3605	45.4298	51.8897	38.4735	38.9113	42.4242	50.0703	44.403	42.8237
ENSRNOG00000027520	Pls3	48.2813	46.918	46.2823	48.4775	48.2532	46.9805	38.8893	40.4033	42.2917
ENSRNOG00000021232	Ddrgk1	49.1381	49.4319	45.8873	40.1907	42.1519	42.7023	45.8235	46.2946	45.1297
ENSRNOG00000012929	Wsb1	44.2751	47.2918	45.3809	48.5819	53.5085	49.0404	39.8127	39.1312	39.2501
ENSRNOG00000017622	Npm3	50.1478	53.0383	56.1461	41.8605	41.3388	41.8133	43.2149	40.013	38.5439
ENSRNOG00000032436	Tmod3	47.081	49.3153	47.5972	45.0962	47.7733	46.5517	40.3117	39.7233	42.5978
ENSRNOG00000060538	Cdc42se1	52.0694	52.7174	55.4236	41.7329	36.9343	38.1939	42.6757	43.8896	42.3601
ENSRNOG00000016936	Nadk	55.9823	54.5094	54.2544	38.5722	37.4791	36.7777	43.3892	42.9406	41.5537
ENSRNOG00000015300	Spsb3	42.5744	41.32	42.5528	47.4299	45.0522	45.7511	48.9366	46.308	44.6537
ENSRNOG00000039528	Fam32a	46.2607	44.652	45.7009	46.6065	44.4906	44.7996	45.1184	43.8935	42.7691
ENSRNOG00000005046	Tspan13	31.7367	31.3196	29.8747	48.8835	50.4323	50.7794	50.3617	55.3165	55.5447
ENSRNOG00000017250	Gmpr	25.965	28.3837	26.2853	42.4443	39.2777	41.9985	68.7549	64.2166	66.6391
ENSRNOG00000018271	Scamp4	51.8296	47.7056	46.7865	43.5056	42.0431	42.7079	47.2686	42.9353	38.6223
ENSRNOG00000005556	Snrpf	44.4086	53.1476	47.5875	48.1017	45.6738	42.2043	40.063	40.094	41.5839
ENSRNOG00000028566	Pld4	35.9798	37.257	36.8501	55.3034	54.6261	57.472	44.3321	40.4719	40.4862
ENSRNOG00000011148	Ssr3	44.8302	46.0646	46.5853	47.6813	54.8655	51.587	33.7066	37.6264	39.7264
ENSRNOG00000014890	Mrpl43	44.3834	41.9085	43.9244	48.0234	40.7635	41.4113	45.8856	48.938	47.3345
ENSRNOG00000056746	Tchh	119.208	114.92	124.165	5.8439	6.16698	6.75985	8.80613	8.82381	7.74157
ENSRNOG00000010951	Cmtm6	59.494	59.7753	60.2788	35.8577	37.1961	36.6725	38.0201	38.0791	37.0404
ENSRNOG00000019507	Hnrnpul2	50.5334	52.656	50.7764	39.7049	41.8852	39.44	43.8864	42.1502	41.2841
ENSRNOG00000018505	Cidea	27.4303	24.0588	27.8594	40.0205	38.8283	37.5555	73.4853	66.0659	66.9203
ENSRNOG00000018044	Phyh	26.9834	28.8968	27.6018	40.9815	48.2489	44.8618	62.146	60.2691	62.2291
ENSRNOG00000019478	Irf9	38.1005	39.8484	38.2576	49.8838	51.2395	53.3779	44.3346	42.5323	44.5425
ENSRNOG00000033152	Rps18l1	43.6117	41.9518	33.6959	53.4283	47.6962	47.4859	47.3647	44.8898	41.6742
ENSRNOG00000048771	RGD1559482	64.575	63.7301	66.4626	27.457	27.9607	28.5699	40.0332	39.2138	43.5997
ENSRNOG00000016630	Tln1	55.0262	52.5096	53.0485	40.69	39.4219	40.2951	40.2663	40.8022	39.4679
ENSRNOG00000009205	Lmo4	44.5416	48.9653	49.3566	37.3019	36.6779	38.4505	48.9368	46.848	50.3066
ENSRNOG00000013381	Tsg101	46.8239	46.948	46.2911	45.0614	42.8814	43.2037	44.5709	42.6757	42.8144
ENSRNOG00000023317	Colgalt1	51.9727	52.4525	49.9552	45.835	46.8462	43.6195	37.1546	36.8092	36.6135
ENSRNOG00000004111	Soat1	44.8348	43.5763	42.5865	31.9797	32.9426	31.1353	58.2336	56.2483	59.5588
ENSRNOG00000025448	Limd2	45.4399	45.7875	42.1817	52.342	52.1458	50.1717	38.582	35.8425	38.3351
ENSRNOG00000039417	Dda1	47.9908	47.0785	48.4982	43.9474	40.4394	42.7453	45.2551	43.4555	41.0379
ENSRNOG00000018471	LOC100362339	39.0441	47.2911	37.9165	42.3654	41.0242	42.3215	49.0528	49.7493	51.6536
ENSRNOG00000019913	Mta2	48.9033	47.3735	49.1568	41.4106	42.7156	40.1495	42.9383	44.4729	43.1012
ENSRNOG00000006756	Maged1	46.8603	47.2732	46.3126	52.1005	49.8425	51.0776	35.9819	35.421	35.2842
ENSRNOG00000007152	Bhlhe40	45.604	43.1385	47.1181	38.9517	41.1991	40.3038	46.7291	47.7075	49.3299
ENSRNOG00000051490	Plcg1	41.5995	42.7484	41.0676	48.7779	47.2669	48.9725	43.2736	43.7715	42.4913
ENSRNOG00000013577	Kdelr3	46.8713	45.3164	48.7685	56.4184	56.3509	50.8979	34.2023	31.8246	29.2598
ENSRNOG00000004711	Mta1	42.334	41.0402	45.9067	44.0561	43.9499	45.3734	47.5395	45.5483	43.9191
ENSRNOG00000010153	Raf1	43.9707	43.0316	41.3657	44.7307	44.0725	45.9157	44.6463	47.0933	44.6698
ENSRNOG00000017074	Rab28	44.7633	40.7034	42.6681	43.1907	45.4856	42.1285	45.0868	45.2007	49.8731
ENSRNOG00000028822	Bex3	38.3393	37.4509	40.2219	45.6975	47.6574	48.0882	47.9318	48.1968	45.1605
ENSRNOG00000014454	Ap1m1	49.0656	46.3381	47.0636	42.0779	43.7196	43.2424	41.7696	44.2894	41.1125
ENSRNOG00000014090	Retsat	34.946	34.0772	33.8428	51.0327	48.9733	49.8057	48.5712	47.7406	49.3524
ENSRNOG00000060912	Qars	42.1651	41.5685	40.9031	45.9691	43.9651	44.2028	45.5493	46.2981	47.6754
ENSRNOG00000009977	Thrap3	43.5395	45.8712	45.1377	41.4048	42.8285	42.9498	44.4095	46.0356	45.9068
ENSRNOG00000001752	Nrros	47.0467	43.5126	45.7978	46.9865	42.5964	45.5158	42.4667	42.3837	41.6554
ENSRNOG00000020659	Mrpl4	42.5543	39.9963	42.2414	39.254	40.0623	38.2396	55.0409	50.4461	50.0821
ENSRNOG00000017874	Cd53	65.9988	74.9245	67.4045	29.4996	30.8769	29.7682	32.4672	32.2623	34.3535
ENSRNOG00000021881	Metap2	52.1465	56.0772	54.4437	38.4504	40.1106	40.1308	38.4309	39.584	38.1444
ENSRNOG00000005766	Tbc1d20	55.0406	53.2345	49.8094	42.0209	40.7291	40.8178	40.6045	39.1738	36.03
ENSRNOG00000012760	Chtop	44.2559	44.9371	43.9367	45.3935	44.9527	45.3398	43.8602	41.5742	43.1022
ENSRNOG00000010408	Polr2k	37.2818	37.4859	34.1072	43.9067	52.6178	45.4888	48.0643	44.2215	54.1529
ENSRNOG00000000122	Ak2	48.3066	50.0967	48.0122	40.0373	41.1796	42.4672	43.5795	42.3129	41.3133
ENSRNOG00000033215	RT1-Db1	30.5294	30.514	29.3877	51.8741	55.0139	53.097	50.6316	48.1767	47.8538
ENSRNOG00000012378	Dbnl	45.653	44.3274	46.5014	49.0851	49.982	47.8747	39.4194	37.2402	36.7628
ENSRNOG00000014162	Plekhb2	56.6618	59.0684	57.5164	36.8649	36.8811	39.0916	35.8969	36.7714	37.8983
ENSRNOG00000061376	Psca	81.1322	87.0612	81.6007	11.6903	9.78752	12.2619	35.8468	38.507	37.9841
ENSRNOG00000021390	Meis3	77.8295	75.2576	81.2233	25.0489	19.9887	23.6704	32.7325	30.3634	29.6729
ENSRNOG00000014666	Tfeb	46.3111	41.919	44.54	37.4947	38.3485	37.5634	53.1896	49.3166	47.03
ENSRNOG00000015144	Ist1	40.4067	42.1542	40.9444	48.6738	46.9064	45.7196	42.6883	43.1682	44.9551
ENSRNOG00000054957	Sfrp4	34.8918	32.6545	31.7293	54.3769	52.492	54.6445	45.5528	44.6343	44.6205
ENSRNOG00000028211	Akap17a	42.8274	43.0186	44.0477	44.7063	45.0291	42.9603	45.5477	43.7511	43.3101
ENSRNOG00000050500	Tob2	25.6745	25.3951	25.1662	35.3885	35.4769	38.1024	71.2935	71.0281	67.6631
ENSRNOG00000014270	Rer1	49.4476	48.2047	44.3904	41.2039	45.162	42.0263	42.5961	40.5725	41.4785
ENSRNOG00000047134	Gtf2f1	47.9393	48.5695	47.9367	42.9287	43.6492	44.0662	40.9953	38.7381	40.0355
ENSRNOG00000006001	Luc7l2	37.368	40.0127	39.4941	46.6452	46.5839	45.6811	47.3601	45.489	46.0722
ENSRNOG00000021100	Tnfaip8l2	60.6037	53.8026	53.0954	40.936	37.3695	38.7303	37.6224	36.8458	35.6323
ENSRNOG00000014252	Irf2bp1	44.6567	37.3452	43.2082	38.5901	41.0121	39.0204	53.5273	50.7262	46.2759
ENSRNOG00000001647	Ets2	42.3064	42.4113	45.3738	43.8207	41.078	42.5685	44.3596	45.5479	46.888
ENSRNOG00000019651	Slc12a4	41.5289	41.0953	39.4155	47.924	48.2152	47.6973	43.9958	43.8539	40.4188
ENSRNOG00000000185	Mpst	36.1703	35.2374	34.8697	41.706	39.6396	40.1251	57.8763	55.8941	52.4045
ENSRNOG00000013000	Ldhb	26.3871	27.475	27.7646	46.5853	43.6695	45.8285	58.263	56.7035	61.0863
ENSRNOG00000016923	Clptm1l	49.9645	54.9827	51.0206	41.2228	43.3688	40.3452	37.5034	38.3826	36.2462
ENSRNOG00000013506	Zfand6	42.2587	43.8364	42.6704	42.0104	48.2327	42.2379	42.9555	41.4971	47.3296
ENSRNOG00000016778	Cops7a	39.9243	39.2341	41.7725	42.5288	42.6579	41.1403	50.298	46.8263	48.5639
ENSRNOG00000001061	Rilpl2	65.9255	62.1054	67.2721	32.1348	31.2578	31.6518	36.1404	34.2471	31.9541
ENSRNOG00000030625	Tf	43.4779	41.456	43.719	48.7563	45.9642	47.2908	41.0372	40.7632	40.2136
ENSRNOG00000030055	Vamp3	41.507	44.4622	46.5856	47.0274	48.0802	48.3039	36.831	40.1158	39.5944
ENSRNOG00000036835	Copz1	45.6934	46.4958	47.222	44.7187	43.1503	44.6278	40.6446	39.1295	40.5578
ENSRNOG00000002322	RGD1310587	45.5534	44.8389	43.8763	42.3944	41.6827	42.8645	43.4016	43.9429	43.5881
ENSRNOG00000014785	Ykt6	49.0309	52.8386	54.5816	45.3013	42.4475	43.7435	32.5053	36.3302	35.2975
ENSRNOG00000020393	Rhog	49.9278	48.9605	49.9936	41.9605	41.5808	43.2581	39.0068	38.434	38.4016
ENSRNOG00000019798	Stub1	39.9025	40.4046	43.9683	48.0557	43.0077	44.5898	43.4597	44.4131	43.4708
ENSRNOG00000000664	Tpst2	51.3769	45.362	50.4989	49.2659	46.7638	47.9699	33.3473	34.0517	32.5692
ENSRNOG00000008050	Stac3	20.0912	21.7184	21.6523	41.8874	40.2294	41.6705	70.7906	65.9078	66.8511
ENSRNOG00000046000	Clasrp	40.3677	37.147	39.2684	46.8012	44.0243	45.5281	47.0665	46.5555	43.9225
ENSRNOG00000001430	Polr2j	38.3727	40.2149	37.9961	44.5859	43.6819	42.6129	52.6125	46.8355	43.7372
ENSRNOG00000007892	Tram1	51.6362	53.0761	49.5641	41.0007	41.8406	41.954	35.1783	37.2756	39.1015
ENSRNOG00000013211	Chchd3	43.5991	39.754	39.6179	42.8808	42.4676	45.9615	44.2151	45.1906	46.5376
ENSRNOG00000006420	Rbm38	25.2527	20.1935	23.4903	45.4063	45.5969	49.8449	62.8494	62.166	54.4202
ENSRNOG00000019908	Lamtor2	37.5246	38.7599	38.1545	44.9198	42.1454	45.1181	48.5619	45.3428	48.1689
ENSRNOG00000015310	Lrrc32	43.9444	41.1696	39.9609	46.3674	45.5879	46.6266	43.5586	41.3906	40.0589
ENSRNOG00000035636	Mirlet7b	35.2399	18.7114	27.3563	62.3963	59.8087	48.4965	43.5406	44.4964	48.5691
ENSRNOG00000016779	Fam120a	50.8996	49.0887	50.4402	38.7004	37.6379	40.8678	40.2689	40.2304	40.4367
ENSRNOG00000019465	Gnai3	48.7161	50.4414	48.2471	41.5962	43.6974	40.7403	37.5032	37.8508	39.5981
ENSRNOG00000043400	LOC100910678	27.7166	42.8959	22.3585	32.6381	21.6329	43.9051	114.478	66.8724	15.8175
ENSRNOG00000012764	Agap3	50.003	46.8992	48.8073	38.3149	39.2412	38.3044	43.844	41.5847	41.2513
ENSRNOG00000049681	Mapre2	43.011	49.2336	47.3709	43.4227	45.4511	43.4637	38.748	38.7187	38.8288
ENSRNOG00000033280	Pam	35.3375	35.0071	35.0873	51.2156	52.354	51.9046	41.7676	43.4865	41.7541
ENSRNOG00000033508	Mink1	43.5576	40.7787	44.3689	41.4071	41.0889	41.7309	45.7824	45.0667	43.9497
ENSRNOG00000049385	Adamtsl4	28.8242	26.2879	27.9104	47.3625	45.4552	47.9586	57.2872	55.2129	51.0315
ENSRNOG00000009152	Caprin1	46.3896	47.1964	46.219	42.3041	43.3313	43.6071	38.022	39.486	40.6941
ENSRNOG00000010789	Dusp7	44.6965	43.8452	42.7387	42.5143	41.8467	43.8179	42.9545	42.5232	42.2746
ENSRNOG00000006766	Laptm4b	39.5998	41.2504	39.7262	44.6717	48.1611	48.1224	42.4748	39.592	43.2603
ENSRNOG00000047606	Bcl2a1	62.1503	66.7465	65.9272	31.7967	33.7852	30.3532	32.8241	31.4066	31.5782
ENSRNOG00000023919	Gbas	30.6286	32.8173	29.7197	43.4263	41.3111	44.7495	52.4602	53.975	57.0346
ENSRNOG00000014297	Sdc4	44.7289	47.2814	45.5422	37.3048	35.1709	37.0026	45.4992	45.6053	47.4717
ENSRNOG00000020676	Ppp1r14a	38.8955	32.7346	37.9094	41.7176	43.3385	46.5353	48.9675	50.2373	44.8411
ENSRNOG00000010041	Ube2g1	35.1198	36.0707	35.9652	41.7205	39.7901	41.8986	51.1944	51.6909	51.5757
ENSRNOG00000020542	Krtcap2	44.7995	44.974	44.9352	43.026	42.9575	46.4971	41.8186	37.8368	38.1668
ENSRNOG00000012183	Glrx	43.6316	45.3515	42.5864	42.6115	42.6921	39.451	42.5238	42.1399	43.8622
ENSRNOG00000020853	Scap	46.2687	40.9329	45.4192	40.0039	37.9601	42.8894	45.2436	44.0572	42.005
ENSRNOG00000018391	Cdk2ap2	45.0048	40.4876	44.6566	42.6216	39.9044	44.8887	43.4009	42.2439	41.3005
ENSRNOG00000024140	Sft2d1	42.7473	44.4269	42.4179	46.1258	42.3369	44.3971	42.4496	40.2901	39.3018
ENSRNOG00000004339	Yy1	49.3262	44.9222	48.4125	39.7692	37.8611	39.156	43.5997	41.7166	39.4883
ENSRNOG00000019236	Rnf220	41.4966	42.0721	40.7143	44.0771	40.6823	41.3663	44.7963	44.5301	44.491
ENSRNOG00000003076	Rbms2	45.8995	40.3187	44.199	47.5515	43.8216	46.965	38.7378	37.5966	39.0437
ENSRNOG00000007895	Pdhb	40.8611	42.8544	40.4745	40.7853	40.9133	41.037	47.3193	43.7493	45.9816
ENSRNOG00000000481	Cuta	39.0622	42.6029	41.3756	41.9114	42.9746	43.3843	48.8133	42.8771	40.8265
ENSRNOG00000051006	Ufsp1	29.6712	26.4809	27.4068	51.496	47.5494	49.6164	50.0322	49.8044	51.3707
ENSRNOG00000016243	Casq2	20.0579	23.8747	23.5225	66.165	67.2126	69.8799	37.1658	37.8347	37.5455
[truncated: 32,129 more rows]

## Sheet: STZ VS Con
STZ VS Con
gene_id	gene_name	log2FoldChange	pvalue	FDR
ENSRNOG00000049695	Myh2	1.0496	0	0
ENSRNOG00000005825	Lyz2	-1.2124	0	0
ENSRNOG00000008816	Gpnmb	-2.22968	0	0
ENSRNOG00000018991	Gsn	1.49652	0	0
ENSRNOG00000019810	Des	1.2644	0	0
ENSRNOG00000006783	Neb	1.3757	0	0
ENSRNOG00000052219	Gm2a	-1.7802	0	0
ENSRNOG00000021201	Txnip	1.13466	0	0
ENSRNOG00000020557	Ryr1	1.39815	0	0
novel.713	-	1.33682	0	0
ENSRNOG00000057092	Slfn4	1.40092	0	0
ENSRNOG00000000875	Fhl1	1.93971	0	0
ENSRNOG00000018220	Pde4dip	1.65961	0	0
ENSRNOG00000057988	Pfkm	1.25724	0	0
ENSRNOG00000010645	Lgals3	-1.58764	0	0
ENSRNOG00000040122	Myoz1	1.30838	0	0
ENSRNOG00000006542	Atp6v0c	-1.27307	0	0
ENSRNOG00000017414	Irf7	1.84112	0	0
ENSRNOG00000021155	Ctsk	-1.53084	0	0
ENSRNOG00000003622	Cybb	-2.14936	0	0
ENSRNOG00000033564	Cfd	1.92426	0	0
ENSRNOG00000004583	Mb	1.17357	0	0
ENSRNOG00000056493	Mybpc1	1.43918	0	0
ENSRNOG00000012181	Lpl	-1.48789	0	0
ENSRNOG00000000805	Gja1	-1.30954	0	0
ENSRNOG00000030187	Mmp12	-2.81802	0	0
ENSRNOG00000010872	Ckb	-1.62595	0	0
ENSRNOG00000030729	C4b	1.69306	0	0
ENSRNOG00000043451	Spp1	-1.72278	0	0
ENSRNOG00000001224	Itgb2	-2.57147	0	0
ENSRNOG00000018390	Pld3	-1.75319	0	0
ENSRNOG00000012658	Pdlim3	1.51376	0	0
ENSRNOG00000046276	Myh3	2.75861	0	0
ENSRNOG00000007461	Klhl41	1.69783	0	0
ENSRNOG00000026605	Ifi27l2b	1.78326	0	0
ENSRNOG00000003336	Mybph	1.64923	0	0
ENSRNOG00000001959	Mx1	2.56515	0	0
ENSRNOG00000019077	Lipa	-2.24092	0	0
ENSRNOG00000021125	Prdx5	-1.43801	0	0
ENSRNOG00000017833	Actn2	1.89378	0	0
ENSRNOG00000002934	Atp1b1	-2.06896	0	0
ENSRNOG00000049495	Krt71	-2.77995	0	0
ENSRNOG00000020263	Atp1a3	-3.05668	0	0
ENSRNOG00000013754	Krt35	-3.90551	0	0
ENSRNOG00000008536	Actc1	2.50369	0	0
ENSRNOG00000009484	Ptcd3	-2.15819	0	0
ENSRNOG00000056746	Tchh	-4.26129	0	0
ENSRNOG00000009047	Sln	4.01609	0	0
ENSRNOG00000011891	Atp6v1b2	-1.64885	0	0
ENSRNOG00000001314	Fam20c	-2.18885	0	0
ENSRNOG00000013526	Rassf4	-2.137	0	0
ENSRNOG00000009073	Tnni1	2.2556	0	0
ENSRNOG00000029911	Cilp	2.18451	0	0
ENSRNOG00000036604	Ifit2	1.99353	0	0
ENSRNOG00000001963	Mx2	1.74078	0	0
ENSRNOG00000008436	Krt85	-4.35097	0	0
ENSRNOG00000022256	Cxcl10	3.52049	0	0
ENSRNOG00000017539	Mmp9	-2.33403	0	0
ENSRNOG00000031743	Gbp2	1.78955	0	0
ENSRNOG00000005871	Il1rn	-2.09432	0	0
ENSRNOG00000028548	Ccl9	-3.41904	0	0
ENSRNOG00000019728	Itgad	-2.06632	0	0
ENSRNOG00000011196	Krt25	-3.16099	0	0
ENSRNOG00000043203	Krt75	-2.74961	0	0
ENSRNOG00000025691	Pla2g7	-2.85362	0	0
ENSRNOG00000030344	Krt31	-5.33505	0	0
ENSRNOG00000022839	Ifit3	2.21584	0	0
ENSRNOG00000007539	Rsad2	2.90862	0	0
ENSRNOG00000049766	Sctr	-3.39647	0	0
ENSRNOG00000007690	Cmpk2	2.56835	0	0
ENSRNOG00000025087	Krt73	-3.3728	0	0
ENSRNOG00000012008	S100a3	-4.17853	0	0
ENSRNOG00000010210	Slc7a11	-3.13746	0	0
ENSRNOG00000018958	Mt3	-2.95134	0	0
ENSRNOG00000019004	Mt4	-4.61955	0	0
ENSRNOG00000008668	Vsig8	-4.18842	0	0
ENSRNOG00000021802	Isg15	2.13308	2.54038e-300	6.29981e-298
ENSRNOG00000049075	Fabp5	-1.34912	4.65952e-299	1.14069e-296
ENSRNOG00000029386	RT1-N2	2.69553	8.18263e-295	1.97781e-292
ENSRNOG00000001757	Tm4sf19	-2.8265	8.76596e-293	2.09232e-290
ENSRNOG00000020431	Matk	-2.41309	1.78397e-287	4.20555e-285
ENSRNOG00000029658	Rnf213	1.38061	6.34486e-277	1.4775e-274
ENSRNOG00000036677	Slc16a3	-2.04771	6.34542e-275	1.45983e-272
ENSRNOG00000030019	Atp1a1	-1.0224	3.13991e-272	7.1377e-270
ENSRNOG00000018943	Tnnc1	2.91669	8.59977e-270	1.93191e-267
ENSRNOG00000011912	Tmem38a	1.49103	3.74545e-267	8.3162e-265
ENSRNOG00000018598	Ankrd1	1.88522	6.93466e-266	1.52204e-263
ENSRNOG00000003104	Trpv2	-1.9057	3.79123e-257	8.22654e-255
ENSRNOG00000028616	Pck1	3.08737	4.03718e-255	8.6618e-253
ENSRNOG00000030814	Kb23	-5.19559	6.37762e-255	1.35312e-252
ENSRNOG00000019050	Ifit1	1.74776	1.68416e-252	3.53396e-250
ENSRNOG00000019745	Actn3	0.899177	1.62539e-250	3.37356e-248
ENSRNOG00000050042	Myh8	2.38385	3.3872e-250	6.95469e-248
ENSRNOG00000023803	Cmya5	1.35873	1.57216e-248	3.19366e-246
ENSRNOG00000028041	Tnnt1	3.94451	3.19316e-248	6.41825e-246
ENSRNOG00000007281	Flnc	1.20299	1.154e-247	2.29539e-245
ENSRNOG00000036703	Itgax	-1.91004	2.84425e-247	5.59908e-245
ENSRNOG00000020150	Il18bp	-1.99302	1.75281e-243	3.4153e-241
ENSRNOG00000008855	Gjb2	-1.77806	7.5493e-242	1.4561e-239
ENSRNOG00000002548	Tnn	-0.877511	2.58693e-241	4.93975e-239
ENSRNOG00000010331	Ctsb	-0.736519	4.69756e-240	8.88118e-238
ENSRNOG00000016714	Nrap	1.56488	2.41705e-238	4.52487e-236
ENSRNOG00000026235	Hk3	-1.82296	7.46119e-238	1.38322e-235
ENSRNOG00000032859	Krt83	-5.72204	1.09967e-236	2.01906e-234
ENSRNOG00000020843	LOC100360087	-1.04796	1.39907e-236	2.54431e-234
novel.111	-	1.37455	9.48209e-234	1.70812e-231
ENSRNOG00000010524	Cryab	2.03897	6.67175e-233	1.19063e-230
ENSRNOG00000014327	Csrp3	2.50454	8.00091e-232	1.41461e-229
ENSRNOG00000008837	Ass1	-2.59437	8.70381e-232	1.52476e-229
ENSRNOG00000025695	Tns3	-1.39473	2.5123e-230	4.36113e-228
ENSRNOG00000038286	Slamf6	-3.02481	7.86029e-230	1.35218e-227
ENSRNOG00000020369	Igf2	1.3691	3.27617e-229	5.58557e-227
novel.587	-	-3.14907	1.8341e-228	3.09931e-226
ENSRNOG00000000913	Gusb	-1.51935	5.02521e-228	8.41722e-226
ENSRNOG00000033581	Tnxb	1.29179	1.06727e-227	1.77213e-225
ENSRNOG00000000571	Psap	-0.765183	9.98957e-227	1.6444e-224
ENSRNOG00000019147	Stom	-1.26657	1.37295e-225	2.24072e-223
ENSRNOG00000054251	Clec7a	-2.48265	1.23664e-224	2.00116e-222
ENSRNOG00000010960	Ankh	-1.47522	1.51709e-224	2.43436e-222
ENSRNOG00000039390	Slc37a2	-1.97838	1.63824e-224	2.60685e-222
ENSRNOG00000040350	Mir675	1.46881	6.90753e-214	1.09008e-211
ENSRNOG00000020206	Ctsd	-0.930434	5.45298e-213	8.53481e-211
ENSRNOG00000001989	Alcam	-1.73977	1.53653e-211	2.38537e-209
ENSRNOG00000019440	Kcnn4	-1.86267	2.3827e-210	3.66917e-208
ENSRNOG00000006950	Padi3	-3.05757	1.02983e-209	1.57317e-207
ENSRNOG00000004278	Dlx3	-2.38266	7.47784e-206	1.13325e-203
ENSRNOG00000007302	Fbn1	0.872359	5.53798e-204	8.32659e-202
ENSRNOG00000050675	Myl4	1.62988	1.08267e-202	1.61512e-200
ENSRNOG00000058470	Col12a1	-0.738955	1.1417e-200	1.68999e-198
ENSRNOG00000007091	Ly6e	0.895723	3.22939e-200	4.74347e-198
ENSRNOG00000031269	RGD1304694	-1.37593	9.85559e-198	1.43658e-195
ENSRNOG00000003858	Atp6ap2	-1.52535	6.53486e-192	9.45327e-190
ENSRNOG00000023969	Herc6	1.78154	2.63568e-190	3.78408e-188
ENSRNOG00000039754	Rab7b	-1.83768	5.14032e-190	7.32496e-188
ENSRNOG00000032240	Gbp5	2.14638	1.98634e-189	2.80957e-187
ENSRNOG00000048321	Tnfsf8	-3.61179	1.06353e-186	1.49325e-184
ENSRNOG00000008312	Stra6	-3.55362	1.89228e-186	2.63745e-184
ENSRNOG00000019556	Cd9	-1.00955	4.68951e-185	6.48885e-183
ENSRNOG00000050697	Ctsz	-0.923317	1.52312e-184	2.09237e-182
ENSRNOG00000012852	Bin1	1.01562	5.83388e-181	7.957e-179
ENSRNOG00000024294	AABR07019083.1	-1.53486	6.30224e-181	8.53485e-179
ENSRNOG00000003895	Rgs1	-2.17957	6.75579e-181	9.08463e-179
novel.99	-	0.947627	6.89988e-179	9.21351e-177
ENSRNOG00000001992	Atp6v1a	-1.3418	8.06457e-179	1.0694e-176
ENSRNOG00000036871	Krt81	-5.09563	1.95128e-177	2.56963e-175
ENSRNOG00000028679	Hoxc13	-2.64065	2.51607e-177	3.2907e-175
novel.751	-	1.47219	3.21399e-176	4.17491e-174
ENSRNOG00000022884	Cd84	-2.43728	1.75107e-175	2.25924e-173
ENSRNOG00000011054	Laptm5	-1.04391	4.33378e-175	5.55392e-173
ENSRNOG00000016064	Tkt	-1.02338	7.15392e-175	9.10693e-173
ENSRNOG00000027478	Krtap11-1	-4.80521	1.58571e-174	2.00524e-172
ENSRNOG00000013578	Trem2	-1.77392	1.79414e-173	2.25389e-171
ENSRNOG00000017369	Mustn1	1.37944	7.08684e-173	8.84465e-171
ENSRNOG00000010389	Ndrg2	1.02604	6.34698e-172	7.86985e-170
ENSRNOG00000008676	Emp1	-0.910391	1.55702e-171	1.91814e-169
ENSRNOG00000036711	Spn	-2.01128	1.2675e-169	1.55146e-167
ENSRNOG00000032857	Klk1	2.04068	1.49476e-168	1.81798e-166
ENSRNOG00000017895	Eno1	-0.787571	5.45625e-167	6.59412e-165
ENSRNOG00000003276	Myo1d	-1.25643	1.36795e-166	1.64283e-164
ENSRNOG00000007036	Tgfbr1	-1.5821	8.89069e-166	1.06105e-163
ENSRNOG00000058068	Obscn	1.00729	1.01202e-165	1.20028e-163
ENSRNOG00000013611	Krt32	-4.54969	2.16927e-165	2.55692e-163
ENSRNOG00000022218	Ifi44	1.47948	3.13289e-165	3.6701e-163
ENSRNOG00000013262	Myl1	0.771983	4.50582e-165	5.24626e-163
ENSRNOG00000014398	Scara5	1.747	1.63363e-164	1.89055e-162
ENSRNOG00000020276	Tnni2	0.957919	4.84018e-162	5.56767e-160
ENSRNOG00000010079	Car3	0.692858	9.89202e-162	1.13107e-159
ENSRNOG00000004554	Dcn	0.85025	5.80092e-161	6.59337e-159
ENSRNOG00000018355	Msx2	-2.34271	1.89183e-160	2.13755e-158
ENSRNOG00000016257	Cotl1	-1.00409	2.17656e-160	2.44479e-158
ENSRNOG00000016151	Ankrd23	1.4215	1.53744e-159	1.71681e-157
ENSRNOG00000011628	Krt27	-2.97765	1.16464e-158	1.29296e-156
ENSRNOG00000009565	Pdk4	2.30458	8.27651e-158	9.13526e-156
ENSRNOG00000010529	Thbs2	-0.732253	7.55784e-157	8.29408e-155
ENSRNOG00000016243	Casq2	1.58135	1.09968e-155	1.1999e-153
ENSRNOG00000017786	Acta1	0.900297	1.52895e-155	1.65883e-153
ENSRNOG00000021390	Meis3	-1.77646	6.21567e-155	6.70555e-153
ENSRNOG00000053494	Mcpt1l1	2.17319	1.27356e-154	1.36622e-152
ENSRNOG00000001270	Hvcn1	-2.59324	3.21821e-154	3.43306e-152
ENSRNOG00000028015	Pf4	-1.47584	4.54534e-153	4.82184e-151
ENSRNOG00000021200	Hfe2	1.16097	8.10243e-153	8.54784e-151
ENSRNOG00000018494	Ppp1r3c	1.7987	9.0112e-152	9.45433e-150
ENSRNOG00000034258	Xirp2	1.02501	1.41659e-150	1.47813e-148
ENSRNOG00000059166	Ldb3	0.875606	6.57738e-150	6.82582e-148
ENSRNOG00000014815	Myoz2	3.61629	1.2904e-149	1.33191e-147
ENSRNOG00000026371	Krt17	-1.05929	1.7586e-149	1.8054e-147
ENSRNOG00000033153	Sfn	-1.10302	1.80374e-149	1.84184e-147
ENSRNOG00000015086	Plin1	1.50881	3.51207e-149	3.56717e-147
ENSRNOG00000004078	Eno3	0.774763	6.02579e-148	6.08796e-146
ENSRNOG00000019527	Chrnd	2.31791	1.72284e-147	1.73146e-145
ENSRNOG00000046763	Adssl1	1.17528	2.15318e-146	2.15262e-144
ENSRNOG00000012172	Spi1	-1.19735	2.96881e-146	2.95257e-144
ENSRNOG00000028814	Oasl2	1.39825	8.20947e-146	8.12227e-144
ENSRNOG00000020579	Col7a1	1.00495	1.73194e-145	1.70471e-143
ENSRNOG00000005900	Slc2a6	-1.95059	1.85047e-144	1.81204e-142
ENSRNOG00000049782	Csf2ra	-1.15009	1.15768e-142	1.12786e-140
ENSRNOG00000014204	Pacsin3	1.36458	3.50056e-142	3.39306e-140
ENSRNOG00000056728	G6pd	-1.1661	2.38829e-141	2.30325e-139
ENSRNOG00000013668	Capg	-0.840849	9.37931e-141	8.99989e-139
ENSRNOG00000012303	Apobec2	1.34301	1.72317e-140	1.64519e-138
ENSRNOG00000012477	Eef1a2	0.923997	2.35606e-140	2.23826e-138
ENSRNOG00000005480	Ybx3	0.788649	1.91262e-139	1.808e-137
ENSRNOG00000021771	Trim29	-1.10817	1.58343e-137	1.48944e-135
ENSRNOG00000015385	Pink1	1.00843	4.0693e-137	3.80898e-135
ENSRNOG00000000569	Vsir	-1.08112	5.18283e-137	4.82762e-135
ENSRNOG00000011427	Hr	-0.983142	8.9112e-137	8.26016e-135
ENSRNOG00000006314	Zbp1	2.40264	1.28673e-136	1.18697e-134
ENSRNOG00000001187	Oasl	1.71954	2.48759e-136	2.28368e-134
ENSRNOG00000011677	Slc39a10	-1.19987	3.74223e-135	3.41904e-133
ENSRNOG00000008027	Murc	1.55301	5.51109e-135	5.01116e-133
ENSRNOG00000016983	Myh7	8.75618	8.38639e-135	7.58949e-133
ENSRNOG00000012471	Thbs4	1.88442	1.13369e-134	1.02112e-132
ENSRNOG00000037085	Xirp1	1.75835	5.2029e-134	4.66429e-132
ENSRNOG00000011659	Alpk3	1.49357	7.08818e-134	6.32471e-132
ENSRNOG00000023227	AABR07052585.2	1.09342	6.65104e-133	5.90706e-131
ENSRNOG00000027811	Lilrb4	-1.36647	7.33676e-133	6.4859e-131
ENSRNOG00000033059	Galnt6	-2.01561	3.5947e-132	3.16317e-130
ENSRNOG00000007284	Slc2a1	-1.13493	5.08108e-132	4.45061e-130
ENSRNOG00000046261	Acp5	-1.30922	5.42744e-132	4.73228e-130
ENSRNOG00000059947	Sdc1	-0.803396	4.63828e-131	4.02582e-129
ENSRNOG00000045892	Cfl2	1.19082	6.3411e-131	5.47888e-129
ENSRNOG00000048812	Gpx1	-0.900253	4.08785e-130	3.5161e-128
ENSRNOG00000000815	Smpdl3a	-1.06725	4.3991e-130	3.76685e-128
ENSRNOG00000010744	Nrp1	-0.920029	7.48032e-130	6.37663e-128
ENSRNOG00000014867	Synpo2	1.22374	5.56766e-129	4.72508e-127
ENSRNOG00000007081	Xdh	0.741445	3.62117e-128	3.05957e-126
ENSRNOG00000016731	Tpm2	0.699981	4.24247e-128	3.56872e-126
ENSRNOG00000048273	Apod	1.56458	4.73379e-128	3.96455e-126
ENSRNOG00000012681	Lgals9	1.30148	5.6429e-126	4.70529e-124
ENSRNOG00000021090	Pygm	0.712586	8.96382e-126	7.44192e-124
ENSRNOG00000015155	Tnnc2	0.835522	1.27256e-125	1.05193e-123
ENSRNOG00000003245	Cacng1	1.48186	1.28298e-125	1.05597e-123
ENSRNOG00000006926	Atp6v0d2	-2.97945	3.11739e-124	2.55479e-122
ENSRNOG00000018659	Csf1	-1.26931	6.73997e-124	5.49999e-122
ENSRNOG00000001049	Tpt1	0.679545	6.79016e-124	5.51737e-122
ENSRNOG00000010319	Lcp1	-0.882132	8.37457e-124	6.77595e-122
ENSRNOG00000036728	Cd300lb	-2.23409	9.54851e-124	7.6932e-122
ENSRNOG00000019110	Ocstamp	-3.03571	9.77723e-124	7.84438e-122
ENSRNOG00000016117	Myof	-0.797394	1.08826e-123	8.69472e-122
ENSRNOG00000016837	Ckm	0.720128	1.9962e-123	1.58823e-121
ENSRNOG00000016469	Fxyd2	-1.18505	4.66962e-123	3.69985e-121
ENSRNOG00000013014	Cyba	-1.02415	4.02344e-122	3.17469e-120
ENSRNOG00000000658	Acacb	1.37879	1.57235e-121	1.23556e-119
ENSRNOG00000010438	Cpt1b	1.84665	6.35568e-121	4.97384e-119
ENSRNOG00000022392	Hspb8	0.878375	1.19072e-120	9.28033e-119
ENSRNOG00000005228	Gnptab	-1.29408	1.42262e-120	1.10426e-118
ENSRNOG00000017003	Plxna1	-0.861139	1.10985e-119	8.58e-118
ENSRNOG00000003977	Dusp1	-0.774461	7.74328e-118	5.96201e-116
ENSRNOG00000048961	Bhlhe41	-1.84681	4.3976e-117	3.37238e-115
ENSRNOG00000046231	Cacna1s	1.23017	6.30416e-117	4.81511e-115
novel.847	-	-2.32215	9.0722e-117	6.90174e-115
ENSRNOG00000028545	Ahnak2	-0.990402	3.78905e-116	2.87111e-114
ENSRNOG00000002052	Ccdc80	0.569237	8.79324e-116	6.63664e-114
ENSRNOG00000007393	Ndrg1	-0.804633	1.87242e-115	1.40763e-113
ENSRNOG00000020684	Vat1	-0.675177	8.35142e-115	6.25374e-113
ENSRNOG00000045924	RT1-T24-3	1.24867	1.9123e-114	1.42638e-112
ENSRNOG00000037563	Cd68	-1.16635	2.12167e-114	1.57639e-112
ENSRNOG00000017206	Igfbp5	0.599731	5.06245e-114	3.7468e-112
ENSRNOG00000004518	Cacnb1	1.43466	5.65956e-114	4.17256e-112
ENSRNOG00000057701	Myom1	1.19403	1.43836e-113	1.05636e-111
ENSRNOG00000008301	Tagln2	-0.576177	5.17158e-113	3.78357e-111
ENSRNOG00000007516	Smtnl1	2.53505	2.03856e-112	1.48574e-110
ENSRNOG00000008367	Krt86	-4.54647	3.30528e-112	2.39979e-110
ENSRNOG00000000383	Mypn	1.43086	6.07973e-112	4.39744e-110
ENSRNOG00000019387	Ifi30	-0.931653	9.83657e-112	7.0879e-110
ENSRNOG00000006911	Sptb	1.45441	9.91911e-112	7.1205e-110
ENSRNOG00000006146	Trim54	1.48628	4.30987e-111	3.08229e-109
ENSRNOG00000049560	Glul	0.622908	7.26912e-111	5.17925e-109
ENSRNOG00000061376	Psca	-2.8938	1.26005e-110	8.94448e-109
ENSRNOG00000009331	Hck	-1.49946	1.37079e-110	9.69452e-109
ENSRNOG00000033734	Tnnt2	1.86927	2.81702e-110	1.98491e-108
ENSRNOG00000048622	Sin3b	-1.12452	5.82188e-110	4.08709e-108
ENSRNOG00000017243	Bnip3	1.26651	1.37274e-109	9.60162e-108
ENSRNOG00000004749	Slc30a1	-1.43292	4.76204e-109	3.31865e-107
novel.465	-	1.82617	1.29996e-108	9.02648e-107
ENSRNOG00000028945	Tmem182	1.96572	1.48927e-108	1.03035e-106
ENSRNOG00000047706	RT1-CE16	-1.09417	1.53971e-108	1.0614e-106
ENSRNOG00000023465	LOC500300	1.0414	2.31693e-108	1.59143e-106
ENSRNOG00000007290	Atp1a2	0.952239	1.30277e-107	8.91626e-106
ENSRNOG00000007089	Lgmn	-0.770747	4.61482e-107	3.14714e-105
ENSRNOG00000020949	Hsd17b14	-2.99648	5.04871e-107	3.43079e-105
ENSRNOG00000022298	Cxcl11	2.70766	1.20116e-106	8.13341e-105
ENSRNOG00000018320	Rps15a	0.77247	2.26469e-106	1.52807e-104
ENSRNOG00000015085	Dmpk	0.762095	5.4178e-106	3.64271e-104
ENSRNOG00000043201	Coq8a	1.28582	1.02503e-105	6.86767e-104
ENSRNOG00000017645	Mylpf	0.694712	1.18266e-105	7.89612e-104
ENSRNOG00000012134	Scn4a	1.65003	1.59707e-105	1.06258e-103
ENSRNOG00000052981	AABR07058464.1	1.36363	2.84752e-105	1.88796e-103
ENSRNOG00000008194	Znfx1	1.07816	4.71777e-105	3.11716e-103
ENSRNOG00000011796	C1r	0.675503	2.11036e-104	1.38956e-102
ENSRNOG00000029195	Uba7	1.54413	3.21986e-104	2.11283e-102
ENSRNOG00000005269	Srl	0.93349	8.07012e-104	5.27736e-102
ENSRNOG00000013928	Dsp	-0.797334	8.13481e-104	5.30151e-102
ENSRNOG00000002520	Litaf	-0.911429	2.21964e-103	1.44163e-101
ENSRNOG00000055721	Rnf128	-2.3284	5.91471e-103	3.82852e-101
ENSRNOG00000002256	Art3	1.57121	7.49129e-103	4.83264e-101
ENSRNOG00000011483	S100a9	-1.63168	1.86967e-102	1.20207e-100
ENSRNOG00000008235	Mylk2	1.09864	1.9716e-102	1.26334e-100
ENSRNOG00000009761	Tmod1	1.43611	2.40694e-102	1.53714e-100
ENSRNOG00000010121	Lef1	-1.90479	3.01597e-102	1.91967e-100
ENSRNOG00000004763	Sirpa	-0.871686	5.64122e-102	3.57871e-100
ENSRNOG00000010830	Slc25a4	0.635861	8.30842e-102	5.25329e-100
ENSRNOG00000021161	Fermt3	-1.3312	2.78387e-101	1.75439e-99
ENSRNOG00000052802	Aldoa	0.499401	4.88062e-101	3.06564e-99
ENSRNOG00000058940	Rab11fip1	-1.63645	5.76038e-101	3.60637e-99
ENSRNOG00000012804	C1qc	0.781551	1.05613e-100	6.59043e-99
ENSRNOG00000007364	Rab15	-1.46363	8.99466e-100	5.59456e-98
ENSRNOG00000047800	C5ar1	-1.49445	9.49097e-100	5.88409e-98
ENSRNOG00000015505	Mfap5	0.872749	2.12804e-99	1.31504e-97
ENSRNOG00000050585	Pgam1	-0.746992	2.29642e-99	1.41452e-97
ENSRNOG00000027008	Igtp	1.36886	2.34001e-99	1.43674e-97
ENSRNOG00000006403	Nectin1	-1.23984	3.52439e-99	2.157e-97
ENSRNOG00000012160	Syk	-1.20283	3.82924e-99	2.33608e-97
ENSRNOG00000042233	Rpl41	0.737247	5.03848e-99	3.064e-97
ENSRNOG00000043471	Krtap8-1	-5.10899	2.67012e-98	1.6186e-96
ENSRNOG00000007650	Cd63	-0.624517	4.04419e-98	2.44379e-96
ENSRNOG00000015845	Fam129b	-0.739071	6.14276e-98	3.70019e-96
ENSRNOG00000009465	Sfrp2	-0.677323	6.63441e-98	3.98378e-96
ENSRNOG00000005743	Dapl1	-3.51019	2.54553e-97	1.52373e-95
ENSRNOG00000036701	LOC100361457	-0.681548	2.76374e-97	1.64917e-95
ENSRNOG00000009545	Polr1a	-1.3169	3.34134e-97	1.98763e-95
ENSRNOG00000014453	Anxa5	-0.630184	5.01473e-97	2.9738e-95
ENSRNOG00000052745	Met	-1.84908	8.25281e-97	4.87886e-95
ENSRNOG00000014532	Lbp	-1.02671	8.40658e-97	4.95443e-95
ENSRNOG00000007628	Ptp4a3	0.982392	1.10419e-96	6.48752e-95
ENSRNOG00000029079	Hspb7	1.41889	2.28924e-96	1.34089e-94
ENSRNOG00000007133	Plxnb2	-0.643417	6.75406e-96	3.944e-94
ENSRNOG00000003171	Mpz	0.790269	1.31897e-95	7.67855e-94
ENSRNOG00000020660	Cfl1	-0.576353	7.74559e-95	4.4955e-93
ENSRNOG00000020455	Cst6	-1.22728	1.00448e-94	5.81227e-93
ENSRNOG00000020719	Hrc	0.990138	1.03454e-94	5.96816e-93
ENSRNOG00000046834	C3	2.29196	1.23979e-94	7.13065e-93
ENSRNOG00000039858	Mfsd12	-1.2913	1.25877e-94	7.21806e-93
ENSRNOG00000000777	RT1-S3	0.806629	2.94996e-94	1.68651e-92
ENSRNOG00000018715	Clec10a	1.26573	3.48677e-94	1.98746e-92
ENSRNOG00000052444	RGD1563091	1.38113	4.2917e-94	2.43899e-92
ENSRNOG00000016066	Bambi	-2.16469	1.10895e-93	6.28352e-92
ENSRNOG00000008949	Synpo2l	1.37059	1.73168e-93	9.78299e-92
ENSRNOG00000008943	Penk	2.19122	1.76531e-93	9.94352e-92
ENSRNOG00000018656	Ampd1	1.07174	3.35484e-93	1.88414e-91
ENSRNOG00000014030	Synm	0.930136	5.92643e-93	3.31863e-91
ENSRNOG00000024382	Fcgr3a	1.8372	1.07076e-92	5.97843e-91
ENSRNOG00000018286	Chrna1	2.52295	1.45156e-92	8.08089e-91
ENSRNOG00000014311	Slc7a8	-1.12922	2.59404e-92	1.43992e-90
ENSRNOG00000021752	Foxq1	-2.43054	2.87313e-92	1.59022e-90
ENSRNOG00000020845	Tyrobp	-0.904726	4.22111e-92	2.32954e-90
ENSRNOG00000013231	Ptafr	-1.3191	9.00655e-92	4.9562e-90
ENSRNOG00000010478	LOC500712	-0.883682	3.67326e-91	2.01554e-89
ENSRNOG00000030712	RT1-A2	0.865774	3.87503e-91	2.12016e-89
ENSRNOG00000016346	Prkcd	-1.09062	7.43999e-91	4.05905e-89
ENSRNOG00000012881	Fgl2	0.797979	8.63064e-91	4.69522e-89
ENSRNOG00000034234	Mt-co1	-0.498928	1.32786e-90	7.20326e-89
ENSRNOG00000011971	C1s	0.619977	1.4712e-90	7.95821e-89
ENSRNOG00000037198	Usp18	1.1955	1.59985e-90	8.6297e-89
ENSRNOG00000019390	Klhl40	1.43263	2.27359e-90	1.22294e-88
ENSRNOG00000009019	Slc6a6	-1.13883	4.15663e-90	2.22952e-88
ENSRNOG00000013783	Efhd2	-0.779796	4.6907e-90	2.50893e-88
ENSRNOG00000052080	Camk2b	1.30777	5.54007e-90	2.95496e-88
ENSRNOG00000014779	Pdcd4	-0.93782	1.11608e-89	5.93634e-88
ENSRNOG00000014347	Slc4a2	-0.884463	1.39626e-89	7.40602e-88
ENSRNOG00000005108	Wfs1	-1.50702	1.56898e-89	8.29906e-88
ENSRNOG00000000477	Daxx	0.983091	1.62719e-89	8.5832e-88
ENSRNOG00000009144	Lad1	-1.15944	3.38328e-89	1.77972e-87
ENSRNOG00000016618	Tmem52	1.90285	4.92577e-89	2.584e-87
ENSRNOG00000008182	Htra3	0.852851	6.17413e-89	3.23e-87
ENSRNOG00000010284	St3gal5	-1.3515	1.06117e-88	5.53635e-87
ENSRNOG00000019851	Cox6a2	1.24842	5.11401e-88	2.66082e-86
ENSRNOG00000009889	Pgm1	0.790004	6.96567e-88	3.61439e-86
ENSRNOG00000047367	Card14	-1.43548	2.34787e-87	1.21497e-85
ENSRNOG00000004621	Rtn4	-0.601502	2.93967e-87	1.51711e-85
ENSRNOG00000033134	Mef2c	0.939775	3.79972e-87	1.95568e-85
ENSRNOG00000034254	Actb	-0.516525	6.47557e-87	3.32395e-85
ENSRNOG00000051922	-	1.26462	1.23332e-86	6.31371e-85
ENSRNOG00000032922	Dclk1	1.01951	1.24987e-86	6.38133e-85
ENSRNOG00000019322	Notch1	-0.831488	2.12409e-86	1.08159e-84
ENSRNOG00000048771	RGD1559482	-1.22067	2.3067e-86	1.17145e-84
ENSRNOG00000042630	Asb5	2.2647	8.36218e-86	4.23543e-84
ENSRNOG00000014641	Rpl3l	1.38776	2.51635e-85	1.27116e-83
ENSRNOG00000009466	Unc45b	1.61326	5.92914e-85	2.98726e-83
ENSRNOG00000012660	Postn	0.475934	7.13901e-85	3.58735e-83
ENSRNOG00000029528	Cbs	-2.13948	1.59449e-84	7.99129e-83
ENSRNOG00000002480	Gpr137b	-1.82284	1.82989e-84	9.14704e-83
ENSRNOG00000048402	Igh-6	-2.50053	2.67367e-84	1.33299e-82
ENSRNOG00000017874	Cd53	-1.21523	3.71474e-84	1.84721e-82
ENSRNOG00000036827	Ppp1r1a	2.01016	4.31602e-84	2.14063e-82
ENSRNOG00000018110	Svil	0.797847	6.13201e-84	3.03344e-82
ENSRNOG00000023428	Pik3r5	-1.21842	9.4801e-84	4.67758e-82
ENSRNOG00000047124	Atp2a1	0.728878	3.32684e-83	1.63727e-81
ENSRNOG00000030743	Myog	1.96337	4.93587e-83	2.42289e-81
ENSRNOG00000001821	Adipoq	1.20429	9.22724e-83	4.5178e-81
ENSRNOG00000032443	Lmod3	1.55933	2.53917e-82	1.24004e-80
ENSRNOG00000012616	Ppt1	-0.9686	3.59923e-82	1.75325e-80
ENSRNOG00000020955	Myl3	7.34795	4.89291e-82	2.37514e-80
ENSRNOG00000056092	Hephl1	-4.47364	4.90079e-82	2.37514e-80
ENSRNOG00000052070	Aldh1a3	-1.71567	5.39308e-82	2.60711e-80
ENSRNOG00000003217	Lgals3bp	0.648695	7.20858e-82	3.47596e-80
ENSRNOG00000012609	Trdn	0.971238	2.22346e-81	1.06945e-79
ENSRNOG00000020433	Actn4	-0.542003	2.48011e-81	1.18989e-79
ENSRNOG00000012512	Nexn	1.21061	4.76425e-81	2.28003e-79
ENSRNOG00000015354	Aox1	1.55934	6.11796e-81	2.92056e-79
ENSRNOG00000022364	Dsg4	-3.47129	1.14092e-80	5.43289e-79
ENSRNOG00000011846	Krt28	-2.07506	1.14441e-80	5.43593e-79
novel.347	-	2.48097	7.40389e-80	3.50812e-78
ENSRNOG00000001369	Oas1a	1.40658	1.55172e-79	7.33418e-78
ENSRNOG00000001476	Cldn4	-1.88692	2.00839e-79	9.46918e-78
ENSRNOG00000005903	St14	-1.17249	2.44215e-79	1.14859e-77
ENSRNOG00000000567	Unc5b	-0.979294	3.22049e-79	1.51094e-77
ENSRNOG00000013946	Rnf149	-1.18408	5.66211e-79	2.64995e-77
ENSRNOG00000021088	Tmod4	1.14985	1.32629e-78	6.19205e-77
ENSRNOG00000015850	Rbp7	0.931022	7.42476e-78	3.45794e-76
ENSRNOG00000058645	Tnc	0.515978	1.01276e-77	4.70527e-76
ENSRNOG00000006052	Sulf2	-0.643596	1.80434e-77	8.36261e-76
ENSRNOG00000019342	Sult1a1	1.61162	2.40672e-77	1.11274e-75
ENSRNOG00000000239	Ccl7	1.6403	4.53899e-77	2.09353e-75
ENSRNOG00000008439	Gprc5d	-3.18333	1.22802e-76	5.65039e-75
ENSRNOG00000014288	Fn1	-0.399884	3.43983e-76	1.57893e-74
ENSRNOG00000032951	Jsrp1	1.25271	3.63617e-76	1.66505e-74
ENSRNOG00000013279	LOC681458	0.80516	8.33424e-76	3.80723e-74
ENSRNOG00000003809	Sat1	-0.788464	2.74931e-75	1.25294e-73
ENSRNOG00000053430	Slco4a1	-1.52148	4.17094e-75	1.89629e-73
ENSRNOG00000017619	Aldh1a1	1.82822	4.59851e-75	2.08571e-73
ENSRNOG00000039473	Ccdc152	1.4147	9.17846e-75	4.15314e-73
ENSRNOG00000058866	Myo5a	-1.22165	1.68837e-74	7.62161e-73
ENSRNOG00000003457	Bicdl2	-2.45771	1.9189e-74	8.64186e-73
ENSRNOG00000028895	Rtp4	1.11707	2.56612e-74	1.15294e-72
ENSRNOG00000060988	Kcnc4	1.53768	1.242e-73	5.56712e-72
ENSRNOG00000054890	Flna	-0.555297	1.31748e-73	5.89162e-72
ENSRNOG00000013269	Tnfsf10	1.28052	2.25142e-73	1.00446e-71
ENSRNOG00000023551	Sp6	-2.61829	2.38298e-73	1.06068e-71
ENSRNOG00000016603	Rtn2	1.02928	4.50953e-73	2.00255e-71
ENSRNOG00000025209	Plxnd1	-0.626353	5.50714e-73	2.43988e-71
ENSRNOG00000056219	Olr1	-2.4833	1.21259e-72	5.35983e-71
ENSRNOG00000037409	Scimp	-1.61191	1.29161e-72	5.6959e-71
ENSRNOG00000042825	Cd300le	-0.939334	2.30285e-72	1.0132e-70
ENSRNOG00000043350	Cap2	1.76072	2.46775e-72	1.08326e-70
ENSRNOG00000005798	Cav3	1.41358	3.27709e-72	1.43523e-70
ENSRNOG00000039980	Slc25a5	-0.671618	4.41543e-72	1.92935e-70
ENSRNOG00000021569	Tiam1	-1.27703	1.36012e-71	5.92955e-70
ENSRNOG00000017188	Cyp27a1	1.59963	1.4274e-71	6.20871e-70
ENSRNOG00000039744	RT1-CE4	1.22198	3.35194e-71	1.45466e-69
ENSRNOG00000016372	Slc12a7	-0.847925	7.12055e-71	3.08315e-69
ENSRNOG00000007918	Tbxas1	-1.5557	9.28582e-71	4.0116e-69
ENSRNOG00000011205	Ccl3	-2.27368	1.11771e-70	4.81776e-69
ENSRNOG00000042426	Cyp4v3	-1.29849	2.25349e-70	9.69153e-69
ENSRNOG00000023068	Cd5l	-1.80294	2.3433e-70	1.00551e-68
ENSRNOG00000046005	Scd2	-0.502435	3.39812e-70	1.45487e-68
ENSRNOG00000054352	Atp6ap1	-0.699525	7.81353e-70	3.33779e-68
ENSRNOG00000053891	Phf11b	1.62438	7.91718e-70	3.37452e-68
ENSRNOG00000004540	Clec3b	0.974965	8.11569e-70	3.45143e-68
ENSRNOG00000023463	Parp9	1.00551	1.16975e-69	4.96365e-68
ENSRNOG00000032150	Adcy2	2.01511	2.19953e-69	9.31266e-68
ENSRNOG00000015078	Ifitm3	0.784658	2.87587e-69	1.21493e-67
ENSRNOG00000008609	Capn3	1.6157	3.01216e-69	1.2697e-67
ENSRNOG00000012892	Abca4	2.36775	3.44238e-69	1.44785e-67
ENSRNOG00000022242	Cxcl9	1.3496	3.71892e-69	1.56072e-67
ENSRNOG00000010165	Tnfaip2	-0.853181	3.82972e-69	1.6037e-67
ENSRNOG00000020922	Hspb6	0.854196	5.83435e-69	2.43779e-67
ENSRNOG00000036726	Cd300e	-1.93056	1.21654e-68	5.07203e-67
ENSRNOG00000003722	Dusp27	1.68136	1.35243e-68	5.62628e-67
ENSRNOG00000016976	Clcn7	-1.05695	1.44304e-68	5.9902e-67
ENSRNOG00000031805	Krt36	-4.01856	1.48766e-68	6.162e-67
ENSRNOG00000019648	Col6a3	0.415132	1.90773e-68	7.88487e-67
ENSRNOG00000023943	Gbp1	3.18989	2.49374e-68	1.02847e-66
ENSRNOG00000016543	Trim63	1.51851	2.83816e-68	1.16799e-66
ENSRNOG00000030639	Usp13	1.1405	4.34969e-68	1.78618e-66
ENSRNOG00000030021	Ccl6	1.09293	5.3289e-68	2.18359e-66
ENSRNOG00000058898	Nedd4	0.463177	5.76044e-68	2.35537e-66
ENSRNOG00000010633	Acsl1	0.878918	8.52506e-68	3.47834e-66
ENSRNOG00000029191	LOC685067	1.79223	9.00338e-68	3.66566e-66
ENSRNOG00000018911	Pfkfb3	0.899116	1.27368e-67	5.17465e-66
ENSRNOG00000030763	Dpp4	1.83038	1.4155e-67	5.73865e-66
ENSRNOG00000033215	RT1-Db1	0.817401	1.52659e-67	6.17591e-66
ENSRNOG00000043017	Krtap7-1	-4.60617	2.11255e-67	8.52835e-66
ENSRNOG00000028523	Tctn1	-1.27554	2.41925e-67	9.74589e-66
ENSRNOG00000015024	Mcoln3	-3.04048	2.78674e-67	1.12027e-65
ENSRNOG00000021128	Kcnj11	1.52042	3.15388e-67	1.2652e-65
ENSRNOG00000001480	Ncf1	-1.1915	3.5344e-67	1.41487e-65
ENSRNOG00000007350	Rac2	-1.00027	8.00808e-67	3.19904e-65
ENSRNOG00000015093	Sparcl1	0.513447	1.42598e-66	5.68457e-65
ENSRNOG00000011494	Rpl36a	0.722266	2.1637e-66	8.60746e-65
ENSRNOG00000051831	5_8S_rRNA	-5.06515	2.42558e-66	9.6292e-65
ENSRNOG00000017496	Cnp	1.06583	2.67567e-66	1.06e-64
ENSRNOG00000060021	Txlnb	1.43029	3.00018e-66	1.1861e-64
ENSRNOG00000021560	Cass4	-2.05902	3.44748e-66	1.36012e-64
ENSRNOG00000057404	Slc47a1	-2.44982	3.57202e-66	1.40635e-64
ENSRNOG00000006110	Jph1	1.2255	7.35486e-66	2.88973e-64
ENSRNOG00000023410	Apol9a	1.07376	1.05276e-65	4.12779e-64
ENSRNOG00000023497	Foxe1	-1.60903	1.19903e-65	4.6917e-64
ENSRNOG00000031766	Mt-cyb	-0.456431	1.48426e-65	5.7847e-64
ENSRNOG00000015076	Cyp26b1	1.68625	1.48442e-65	5.7847e-64
ENSRNOG00000021174	Macrod1	1.03931	1.80415e-65	7.01633e-64
ENSRNOG00000003745	Atf3	-0.864809	3.74747e-65	1.45443e-63
ENSRNOG00000059350	Ppp1r3a	1.31459	4.73762e-65	1.83499e-63
ENSRNOG00000013949	Idh2	0.689688	5.60763e-65	2.16757e-63
ENSRNOG00000033220	Oas1b	1.18883	7.49622e-65	2.89172e-63
ENSRNOG00000004214	Rpl26	0.481208	7.6218e-65	2.93424e-63
ENSRNOG00000008409	Myo1f	-0.968057	1.03901e-64	3.99192e-63
ENSRNOG00000002827	Rbfox1	1.24099	1.0535e-64	4.03947e-63
ENSRNOG00000010951	Cmtm6	-0.717318	1.1783e-64	4.50895e-63
ENSRNOG00000049399	Krtap15-1	-6.62892	1.57873e-64	6.02919e-63
ENSRNOG00000039861	LOC690617	-1.00264	2.07355e-64	7.9031e-63
ENSRNOG00000042838	Junb	-0.717221	3.42161e-64	1.30151e-62
ENSRNOG00000017854	Ucp2	-0.559341	6.55938e-64	2.49009e-62
ENSRNOG00000028063	Tmem38b	1.21226	6.6057e-64	2.50269e-62
ENSRNOG00000015717	Ptpre	-1.35764	6.67431e-64	2.52368e-62
ENSRNOG00000026962	Osbpl8	-1.35723	7.0994e-64	2.67911e-62
ENSRNOG00000020583	Fcgrt	0.644596	7.14038e-64	2.68926e-62
ENSRNOG00000019850	Speg	0.803846	1.05915e-63	3.98118e-62
ENSRNOG00000031081	Stat2	0.832439	1.90892e-63	7.16126e-62
ENSRNOG00000048430	Myo18b	0.950734	2.63144e-63	9.85242e-62
ENSRNOG00000048579	Psors1c2	-5.5449	2.92234e-63	1.09202e-61
ENSRNOG00000017922	Tpbgl	-2.16081	6.0506e-63	2.25657e-61
ENSRNOG00000012458	Cyp2e1	6.21146	6.11804e-63	2.27727e-61
ENSRNOG00000018462	Rabep2	0.691072	7.96261e-63	2.9581e-61
ENSRNOG00000023385	Rpl37a	0.662933	1.43956e-62	5.33755e-61
ENSRNOG00000046683	Lilrb3	-0.959228	1.64101e-62	6.07267e-61
ENSRNOG00000015496	Tpm4	-0.543648	2.56384e-62	9.46933e-61
ENSRNOG00000018294	Hspa5	-0.540732	3.03639e-62	1.1193e-60
ENSRNOG00000000521	Cdkn1a	0.722385	3.25327e-62	1.19694e-60
ENSRNOG00000006778	Mmp19	-0.930388	4.27693e-62	1.57054e-60
ENSRNOG00000033090	Ltbp1	0.916844	6.00356e-62	2.20034e-60
ENSRNOG00000011032	Lhfpl2	-0.931103	6.62728e-62	2.42429e-60
ENSRNOG00000000640	Egr2	-1.14469	8.27719e-62	3.02204e-60
ENSRNOG00000022921	Dact2	1.99389	1.38701e-61	5.05438e-60
ENSRNOG00000001889	Comt	-0.766771	2.02162e-61	7.35291e-60
ENSRNOG00000025883	Ip6k3	1.95718	2.11789e-61	7.68844e-60
ENSRNOG00000047102	Popdc3	1.90747	3.33698e-61	1.2091e-59
ENSRNOG00000011381	Acsbg1	1.06592	3.99218e-61	1.44376e-59
ENSRNOG00000013552	Scd	-0.534611	4.11902e-61	1.48682e-59
ENSRNOG00000020308	Ech1	0.806794	4.37878e-61	1.5776e-59
ENSRNOG00000000565	Sgpl1	-0.733735	8.86666e-61	3.18849e-59
ENSRNOG00000000768	Ubd	2.40496	1.19048e-60	4.27296e-59
ENSRNOG00000053452	Actg1	-0.761871	1.85226e-60	6.63583e-59
ENSRNOG00000011557	S100a8	-1.25113	2.80673e-60	1.00364e-58
ENSRNOG00000003232	Slc9a3r1	-1.01283	2.82241e-60	1.00736e-58
ENSRNOG00000002303	Kcnj12	1.97574	6.27779e-60	2.23646e-58
ENSRNOG00000059900	Bst2	0.883845	7.02182e-60	2.49686e-58
ENSRNOG00000016460	Clu	0.695994	1.07401e-59	3.81193e-58
ENSRNOG00000013707	Spata13	-1.12604	1.28875e-59	4.56563e-58
ENSRNOG00000010253	Cd163	1.77225	2.41894e-59	8.55363e-58
ENSRNOG00000001201	Cstb	-0.75886	2.47308e-59	8.72892e-58
ENSRNOG00000052564	Gpx3	0.56381	2.62489e-59	9.24766e-58
ENSRNOG00000021102	Scn1b	0.765956	4.54625e-59	1.59872e-57
ENSRNOG00000049385	Adamtsl4	0.755747	5.63475e-59	1.97786e-57
ENSRNOG00000004147	Abca8a	1.36636	6.24554e-59	2.18823e-57
ENSRNOG00000003029	Calr	-0.451818	6.30051e-59	2.20345e-57
ENSRNOG00000002568	Socs1	1.48863	6.9987e-59	2.44315e-57
ENSRNOG00000016751	Slc25a28	0.780885	7.60471e-59	2.64985e-57
ENSRNOG00000014653	Arl11	-1.21782	7.73915e-59	2.69179e-57
ENSRNOG00000049057	Znrf2	-1.03152	8.83592e-59	3.06767e-57
ENSRNOG00000021206	Pla2g16	0.954585	1.18729e-58	4.11458e-57
ENSRNOG00000054957	Sfrp4	0.697373	1.2731e-58	4.40397e-57
ENSRNOG00000001061	Rilpl2	-1.04613	1.33471e-58	4.60872e-57
ENSRNOG00000017220	Tcirg1	-0.718423	1.98228e-58	6.83242e-57
ENSRNOG00000006094	Cd44	-0.60168	2.36419e-58	8.13409e-57
ENSRNOG00000013840	Ankrd2	5.27243	2.77303e-58	9.52355e-57
ENSRNOG00000011146	Gyg1	0.962577	3.32672e-58	1.14046e-56
ENSRNOG00000009867	Tgfb3	0.940696	5.74969e-58	1.96757e-56
ENSRNOG00000023177	Esrp2	-1.08704	5.86156e-58	2.00226e-56
ENSRNOG00000013118	Atox1	-0.768416	8.728e-58	2.97609e-56
ENSRNOG00000018487	Slc3a2	-0.665053	9.93631e-58	3.38207e-56
ENSRNOG00000021719	Slfn5	0.578954	1.10835e-57	3.76582e-56
ENSRNOG00000012807	C1qa	0.559547	1.49078e-57	5.05622e-56
ENSRNOG00000015913	Tspan5	-0.920249	1.52156e-57	5.15147e-56
ENSRNOG00000020669	Ovol1	-1.5086	1.68359e-57	5.68994e-56
ENSRNOG00000018937	Gstm7	0.968585	1.84344e-57	6.21918e-56
ENSRNOG00000019120	Hmgcs2	1.81953	6.64459e-57	2.23772e-55
ENSRNOG00000021079	Fxyd1	1.07969	7.33855e-57	2.46707e-55
ENSRNOG00000032929	Incenp	-1.32612	8.41678e-57	2.82458e-55
ENSRNOG00000014171	Tnfsf13	-1.23357	8.49123e-57	2.84456e-55
ENSRNOG00000018367	Taldo1	-0.763079	1.01454e-56	3.39277e-55
ENSRNOG00000033747	Sp110	0.981112	1.2551e-56	4.18989e-55
ENSRNOG00000005392	Ngfr	1.47916	1.44378e-56	4.81134e-55
novel.468	-	1.87626	2.17163e-56	7.22427e-55
ENSRNOG00000018681	Nes	1.07552	2.22462e-56	7.38767e-55
ENSRNOG00000011754	Myom2	0.67122	2.70151e-56	8.95579e-55
ENSRNOG00000006116	Hk2	-0.812148	6.42679e-56	2.12685e-54
ENSRNOG00000051302	Krt34	-4.68511	7.80076e-56	2.57708e-54
ENSRNOG00000004132	Lasp1	-0.529993	8.675e-56	2.86095e-54
ENSRNOG00000012404	Thrsp	-0.989987	8.92205e-56	2.93736e-54
ENSRNOG00000046452	Fcgr2b	-1.40552	9.97261e-56	3.27757e-54
ENSRNOG00000003553	Efemp1	1.2752	1.71007e-55	5.6106e-54
ENSRNOG00000017193	Lingo1	-2.1574	2.09832e-55	6.87263e-54
ENSRNOG00000008478	Mmp13	1.69082	2.41735e-55	7.904e-54
ENSRNOG00000021243	Siglec1	0.845497	3.18943e-55	1.04106e-53
ENSRNOG00000004084	Fam84a	-1.19872	4.57949e-55	1.49224e-53
ENSRNOG00000030118	Msn	-0.448573	5.9224e-55	1.92655e-53
ENSRNOG00000020339	Neurl1	1.37012	6.04179e-55	1.96204e-53
ENSRNOG00000008015	Fos	-0.770669	6.50091e-55	2.10755e-53
ENSRNOG00000022957	Ctxn3	2.39941	7.33762e-55	2.37478e-53
ENSRNOG00000000844	Ly6g6d	-3.2476	1.49798e-54	4.83993e-53
ENSRNOG00000001859	Sdf2l1	-1.2469	1.80968e-54	5.83712e-53
ENSRNOG00000009912	Fgr	-1.23619	2.96975e-54	9.56281e-53
ENSRNOG00000000525	Pi16	0.585717	3.52425e-54	1.13292e-52
ENSRNOG00000013781	Kcnq5	2.06097	6.50112e-54	2.08637e-52
ENSRNOG00000015736	Dhrs3	-0.956849	6.71274e-54	2.15067e-52
ENSRNOG00000022099	Trim72	0.816211	6.90983e-54	2.21011e-52
ENSRNOG00000058842	Sptbn2	-1.21088	1.00525e-53	3.2099e-52
ENSRNOG00000000699	Selplg	-1.00824	1.31932e-53	4.20573e-52
ENSRNOG00000005333	Azin1	-0.833196	1.58376e-53	5.04033e-52
ENSRNOG00000000981	Scarb1	-0.494832	1.58647e-53	5.04054e-52
ENSRNOG00000000457	Tap1	0.728192	2.85838e-53	9.06657e-52
ENSRNOG00000002278	Tec	-1.11424	4.39798e-53	1.39269e-51
ENSRNOG00000012811	Spint1	-1.68475	4.65276e-53	1.47093e-51
ENSRNOG00000007475	Gpihbp1	0.884539	7.59659e-53	2.39764e-51
ENSRNOG00000013532	Pgam2	0.542024	1.0696e-52	3.37031e-51
ENSRNOG00000013267	Helz2	0.872122	1.56888e-52	4.93538e-51
ENSRNOG00000047046	Plin4	1.47836	2.48341e-52	7.79947e-51
ENSRNOG00000001520	Dlx1	-2.38411	2.4999e-52	7.83835e-51
ENSRNOG00000039496	Plp2	-0.685208	2.76463e-52	8.65421e-51
ENSRNOG00000010077	Smarcd3	1.01019	5.58443e-52	1.74525e-50
ENSRNOG00000015439	Man2a1	-0.714246	6.21726e-52	1.93985e-50
ENSRNOG00000017159	Dsc3	-0.731015	7.90735e-52	2.46315e-50
ENSRNOG00000016752	Crispld2	-0.633532	8.33808e-52	2.59309e-50
ENSRNOG00000036688	Arhgdia	-0.46628	9.54089e-52	2.96233e-50
ENSRNOG00000006557	Cyfip2	-1.22996	9.64694e-52	2.99039e-50
ENSRNOG00000001766	Tfrc	-0.943074	1.30956e-51	4.05285e-50
ENSRNOG00000019568	Jund	-0.597488	1.70273e-51	5.26111e-50
ENSRNOG00000060350	Iqsec1	-0.716895	2.18291e-51	6.73388e-50
ENSRNOG00000003283	Rcsd1	0.950207	2.20955e-51	6.80506e-50
ENSRNOG00000003365	Cadm3	0.979272	2.58831e-51	7.95873e-50
ENSRNOG00000003975	Pfn1	-0.421664	2.87013e-51	8.81112e-50
ENSRNOG00000012989	Serinc2	-1.10085	4.2777e-51	1.31112e-49
ENSRNOG00000021285	Celsr1	-1.29138	4.38499e-51	1.34185e-49
ENSRNOG00000008551	Rps7	0.385694	4.40167e-51	1.3448e-49
ENSRNOG00000018611	Tpsb2	2.14355	4.43111e-51	1.35163e-49
ENSRNOG00000020563	Cma1	2.19007	4.59452e-51	1.39924e-49
ENSRNOG00000033280	Pam	0.5539	5.75662e-51	1.75036e-49
ENSRNOG00000015049	Scn5a	1.76451	6.28249e-51	1.90722e-49
ENSRNOG00000010189	Rps24	0.484276	6.43986e-51	1.95189e-49
ENSRNOG00000004791	Arf6	-0.647751	9.60164e-51	2.9056e-49
ENSRNOG00000007970	Plxnc1	-1.77775	1.11833e-50	3.37889e-49
ENSRNOG00000009153	Cidec	1.27433	1.14815e-50	3.46349e-49
ENSRNOG00000015152	Pkp3	-0.845147	1.43936e-50	4.3351e-49
ENSRNOG00000008048	Plscr1	-1.27523	2.99132e-50	8.99517e-49
ENSRNOG00000017672	Akr1c14	1.36228	3.04586e-50	9.14478e-49
ENSRNOG00000017319	Mertk	-1.03597	3.63253e-50	1.0889e-48
ENSRNOG00000007545	Angptl4	0.973869	3.7645e-50	1.12669e-48
ENSRNOG00000004290	Grb10	0.622747	3.88724e-50	1.16161e-48
ENSRNOG00000002470	Ifi47	1.05112	4.07169e-50	1.21483e-48
novel.993	-	2.79714	4.39745e-50	1.30997e-48
ENSRNOG00000014475	Slc31a1	-1.13235	5.21313e-50	1.55054e-48
ENSRNOG00000021691	Ccdc92	-1.47118	6.1956e-50	1.83989e-48
ENSRNOG00000012016	Npc1	-0.959851	6.84261e-50	2.02888e-48
ENSRNOG00000020652	Tgfb1	-0.584963	9.8014e-50	2.90167e-48
ENSRNOG00000047307	Cntfr	-1.19259	1.00127e-49	2.95963e-48
ENSRNOG00000028017	Tmem109	0.660791	1.10698e-49	3.26703e-48
ENSRNOG00000017819	Cd14	-0.947919	1.3641e-49	4.01968e-48
ENSRNOG00000005569	Phospho1	0.651184	1.52544e-49	4.48818e-48
ENSRNOG00000007668	Mafa	1.1108	2.58756e-49	7.60147e-48
ENSRNOG00000001351	Trafd1	0.656488	6.26283e-49	1.837e-47
ENSRNOG00000022975	Nfam1	-0.980265	6.28162e-49	1.83969e-47
novel.454	-	0.951453	1.01116e-48	2.95682e-47
ENSRNOG00000012749	C1qb	0.611055	1.08852e-48	3.17817e-47
ENSRNOG00000014079	Stat1	0.610329	1.20755e-48	3.52034e-47
ENSRNOG00000011518	Dusp26	3.46158	1.40193e-48	4.08078e-47
ENSRNOG00000042531	Krtap13-1	-3.82657	2.03732e-48	5.92126e-47
ENSRNOG00000058340	Krt79	0.757643	2.30749e-48	6.69629e-47
ENSRNOG00000028137	Mki67	-0.916816	2.76616e-48	8.01514e-47
ENSRNOG00000006776	Smyd1	1.35614	2.94166e-48	8.51075e-47
ENSRNOG00000016541	Enc1	0.667348	3.03161e-48	8.75772e-47
ENSRNOG00000021644	Slc15a3	-1.14009	3.34948e-48	9.66139e-47
ENSRNOG00000014698	Chrnb1	1.91977	3.5675e-48	1.02747e-46
ENSRNOG00000020942	Plekha4	0.986707	3.81638e-48	1.0975e-46
ENSRNOG00000059097	-	1.7168	3.87914e-48	1.11387e-46
ENSRNOG00000016978	LOC308990	-1.66731	5.27138e-48	1.51137e-46
novel.343	-	-2.0802	6.16705e-48	1.76551e-46
ENSRNOG00000059406	Ier5	-0.745628	6.23308e-48	1.78175e-46
ENSRNOG00000012820	Add3	0.808264	8.19546e-48	2.3392e-46
ENSRNOG00000059456	Grk3	-1.97102	8.35014e-48	2.37979e-46
ENSRNOG00000020129	Cdh3	-0.909091	1.66613e-47	4.74141e-46
ENSRNOG00000019598	Vegfa	0.649287	1.8539e-47	5.2679e-46
ENSRNOG00000000433	Prrt1	-1.13289	1.88036e-47	5.33512e-46
ENSRNOG00000039668	Col8a1	0.966611	2.09842e-47	5.94501e-46
ENSRNOG00000019212	Tpp1	-0.676348	2.57485e-47	7.28397e-46
ENSRNOG00000028703	Slc39a6	-0.820417	2.82477e-47	7.97913e-46
ENSRNOG00000002134	Mpa2l	2.10004	3.47147e-47	9.79139e-46
ENSRNOG00000000795	RT1-N3	1.2689	4.48733e-47	1.2638e-45
ENSRNOG00000025768	Clk1	0.690223	4.77801e-47	1.34368e-45
ENSRNOG00000017022	Cerk	-0.777985	7.14047e-47	2.00511e-45
ENSRNOG00000013069	Sapcd2	-1.89149	9.25484e-47	2.59502e-45
ENSRNOG00000004029	Nectin4	-1.45216	1.00351e-46	2.80969e-45
ENSRNOG00000006723	Itga11	-0.607017	1.02805e-46	2.87417e-45
ENSRNOG00000011901	Rrad	1.53722	2.13086e-46	5.94866e-45
ENSRNOG00000024578	Ttyh2	-1.02657	3.1624e-46	8.81547e-45
ENSRNOG00000030726	Asgr2	1.46822	3.19449e-46	8.89196e-45
novel.894	-	1.28631	4.67366e-46	1.29903e-44
ENSRNOG00000015157	Smtnl2	1.14608	5.66501e-46	1.57229e-44
ENSRNOG00000012002	Iqgap1	-0.519951	6.57235e-46	1.82147e-44
ENSRNOG00000003869	Sod3	0.786426	6.83877e-46	1.89255e-44
ENSRNOG00000015588	Nol3	0.912127	7.57702e-46	2.09382e-44
ENSRNOG00000033844	LOC100912195	2.15895	7.67621e-46	2.11817e-44
ENSRNOG00000047686	Pou3f1	-0.939607	1.04405e-45	2.87678e-44
ENSRNOG00000002946	Socs3	-1.01886	1.17764e-45	3.2402e-44
ENSRNOG00000016478	Eif5a	-0.418848	1.35581e-45	3.72506e-44
ENSRNOG00000030628	Eif4a1	-0.443306	1.52946e-45	4.19612e-44
ENSRNOG00000014940	Sfrp5	-1.54076	1.54064e-45	4.22073e-44
ENSRNOG00000003897	Col1a1	-0.38239	1.59817e-45	4.37206e-44
ENSRNOG00000011994	Perp	-0.534485	2.02933e-45	5.54364e-44
ENSRNOG00000013922	Dok2	-0.907993	2.57602e-45	7.02701e-44
ENSRNOG00000001258	Snx8	-0.847175	2.95068e-45	8.03755e-44
ENSRNOG00000002746	Fstl1	0.466868	2.96114e-45	8.05457e-44
ENSRNOG00000006715	Ccr1	-1.90888	3.83651e-45	1.04208e-43
ENSRNOG00000013547	Slc6a12	-1.61639	3.8742e-45	1.05082e-43
ENSRNOG00000016573	Dgat2	-1.05395	4.19536e-45	1.13632e-43
ENSRNOG00000011134	Lama2	0.782871	4.50431e-45	1.21827e-43
ENSRNOG00000014162	Plekhb2	-0.625228	6.85919e-45	1.85256e-43
ENSRNOG00000010235	Pkig	0.662032	7.90923e-45	2.13315e-43
ENSRNOG00000002014	Stap1	-2.45372	8.65156e-45	2.33006e-43
ENSRNOG00000010918	Cebpa	-0.601239	1.05303e-44	2.83205e-43
ENSRNOG00000043199	Bves	1.67047	1.09615e-44	2.94388e-43
ENSRNOG00000014496	Coro6	1.34956	1.14628e-44	3.07419e-43
ENSRNOG00000043445	Them5	-1.55417	1.41754e-44	3.79633e-43
ENSRNOG00000052940	AABR07030791.1	-2.68365	1.6023e-44	4.28513e-43
ENSRNOG00000003269	Atp6v0e1	-0.730532	2.31566e-44	6.18428e-43
ENSRNOG00000032788	Dysf	0.612919	2.33075e-44	6.21587e-43
ENSRNOG00000015514	Bcat1	-0.67616	2.58498e-44	6.88426e-43
ENSRNOG00000012879	Fabp3	1.79706	3.60239e-44	9.58044e-43
ENSRNOG00000009263	Ifi27	0.557311	3.79485e-44	1.00783e-42
ENSRNOG00000021856	Lat2	-1.59331	5.49811e-44	1.45814e-42
ENSRNOG00000006142	Tmem8c	1.74165	5.6106e-44	1.48591e-42
ENSRNOG00000007925	Pak6	-1.18825	6.43832e-44	1.70277e-42
ENSRNOG00000048315	Eif2ak2	0.798697	8.03257e-44	2.12147e-42
ENSRNOG00000006877	Efnb1	-0.708626	1.02873e-43	2.7132e-42
ENSRNOG00000021812	Scx	1.74141	1.04546e-43	2.75353e-42
ENSRNOG00000004307	Tor3a	1.07286	1.06719e-43	2.80689e-42
ENSRNOG00000013564	Dok3	-1.24555	1.19089e-43	3.12794e-42
ENSRNOG00000016643	Lpcat2	-1.19759	1.28353e-43	3.36663e-42
ENSRNOG00000017307	Prss23	0.62187	1.56666e-43	4.10362e-42
ENSRNOG00000023334	Parp14	0.915509	1.57117e-43	4.1098e-42
ENSRNOG00000018645	Rpsa	0.394022	1.81201e-43	4.7333e-42
ENSRNOG00000011648	Aqp1	-0.509207	1.95714e-43	5.1054e-42
ENSRNOG00000020067	Rab40c	-1.09044	2.00865e-43	5.23262e-42
ENSRNOG00000010666	Wisp2	0.746463	2.39783e-43	6.23795e-42
ENSRNOG00000011284	Sgms2	-1.6755	3.20503e-43	8.32652e-42
ENSRNOG00000016961	Rps27	0.582313	4.20446e-43	1.09082e-41
ENSRNOG00000057189	LOC103690326	-3.05862	5.73543e-43	1.486e-41
ENSRNOG00000012207	Dst	0.396801	7.33639e-43	1.89822e-41
ENSRNOG00000028016	Ncf2	-1.61064	8.78343e-43	2.26955e-41
ENSRNOG00000016853	Dsg1	-1.17754	1.21587e-42	3.13743e-41
ENSRNOG00000010977	Igfbp6	0.65126	1.37919e-42	3.55406e-41
ENSRNOG00000006327	Rcc2	-0.828179	1.47509e-42	3.79607e-41
ENSRNOG00000026302	Lrrn4cl	1.32488	2.592e-42	6.66139e-41
ENSRNOG00000017930	Lpcat1	-0.941342	3.10652e-42	7.97299e-41
ENSRNOG00000020636	Spint2	-0.617203	3.15179e-42	8.07831e-41
ENSRNOG00000011907	Krt23	-3.00624	3.60539e-42	9.22853e-41
ENSRNOG00000017765	Net1	0.593412	4.12941e-42	1.05557e-40
ENSRNOG00000022296	Pnpla5	1.2622	4.25992e-42	1.08748e-40
ENSRNOG00000061215	Crym	-2.11061	4.8924e-42	1.24727e-40
ENSRNOG00000062158	Rn60_1_2212.4	4.00093	5.58073e-42	1.42086e-40
ENSRNOG00000003030	Awat2	1.22732	6.16541e-42	1.56762e-40
ENSRNOG00000015857	Ctsa	-0.386835	6.45428e-42	1.63889e-40
ENSRNOG00000008749	Col5a1	-0.432274	1.31222e-41	3.32761e-40
ENSRNOG00000001976	Tmprss2	2.27195	1.38613e-41	3.51036e-40
ENSRNOG00000014251	Capn5	-0.780226	1.62205e-41	4.1024e-40
ENSRNOG00000016214	Agl	0.550871	1.84435e-41	4.65845e-40
ENSRNOG00000013013	Tle3	-0.58016	1.90677e-41	4.80974e-40
ENSRNOG00000010746	Rpl32	0.503922	1.9099e-41	4.81128e-40
ENSRNOG00000001030	Tsc22d1	0.440011	2.5744e-41	6.47671e-40
ENSRNOG00000011305	Sox10	1.35702	2.63475e-41	6.61981e-40
ENSRNOG00000009314	Ivl	-4.68562	2.83628e-41	7.1168e-40
ENSRNOG00000004805	Stac2	-2.29605	3.1526e-41	7.90012e-40
ENSRNOG00000019655	Atp6v0b	-0.685967	3.36539e-41	8.42229e-40
ENSRNOG00000010402	Hspb2	1.34985	3.42148e-41	8.55145e-40
ENSRNOG00000019542	LOC100910979	1.8069	4.69807e-41	1.17268e-39
ENSRNOG00000049828	Crlf2	-0.954799	5.57253e-41	1.38913e-39
ENSRNOG00000006787	Dhcr24	0.417721	6.79518e-41	1.69171e-39
ENSRNOG00000006302	Gclc	-0.907623	7.26067e-41	1.80524e-39
novel.253	-	-5.13921	7.81076e-41	1.93949e-39
ENSRNOG00000031785	Krt76	-3.29517	1.0597e-40	2.62792e-39
ENSRNOG00000001611	Rpl24	0.45307	1.10564e-40	2.73828e-39
ENSRNOG00000022999	Ppp2r3a	1.03099	1.22372e-40	3.02681e-39
ENSRNOG00000048924	Islr	0.826468	1.28851e-40	3.18294e-39
ENSRNOG00000019780	Sypl2	0.663896	1.33608e-40	3.29618e-39
ENSRNOG00000056150	Purb	-0.753632	1.41999e-40	3.49866e-39
ENSRNOG00000013190	Rnaset2	-0.750459	1.46556e-40	3.60629e-39
ENSRNOG00000008195	Ywhaz	-0.464091	1.59856e-40	3.9285e-39
ENSRNOG00000000405	Vgll2	2.24545	1.75885e-40	4.31687e-39
ENSRNOG00000004699	Fibin	1.19645	1.98278e-40	4.86022e-39
ENSRNOG00000055365	Edem1	-0.777919	2.00262e-40	4.90256e-39
ENSRNOG00000017191	Trim30c	0.856802	2.52183e-40	6.16573e-39
ENSRNOG00000009088	Txnrd1	-0.66928	3.45478e-40	8.43594e-39
ENSRNOG00000010870	Foxn1	-2.8792	3.6733e-40	8.95806e-39
ENSRNOG00000010488	Zmiz1	-0.498992	3.91591e-40	9.53753e-39
ENSRNOG00000006420	Rbm38	1.02526	4.32655e-40	1.05243e-38
ENSRNOG00000000316	Sobp	1.26414	4.47548e-40	1.08727e-38
ENSRNOG00000016575	Tnfrsf1b	-0.878761	4.60229e-40	1.11665e-38
ENSRNOG00000050841	Ache	1.10913	5.37843e-40	1.30195e-38
ENSRNOG00000051480	Fxr1	0.792701	5.37963e-40	1.30195e-38
ENSRNOG00000008050	Stac3	0.955445	6.80561e-40	1.64498e-38
ENSRNOG00000010266	Cd180	-1.57509	9.78656e-40	2.36251e-38
ENSRNOG00000042980	Adam19	-0.503108	1.0102e-39	2.43558e-38
ENSRNOG00000020332	Tnnt3	0.967338	1.24038e-39	2.98677e-38
ENSRNOG00000003206	Actr3	-0.469979	1.25839e-39	3.02633e-38
ENSRNOG00000011227	Atp1b2	0.772928	1.4143e-39	3.397e-38
ENSRNOG00000011984	Cxcl14	-0.792473	1.62557e-39	3.89952e-38
ENSRNOG00000020779	Kcna7	1.55102	2.18056e-39	5.22017e-38
ENSRNOG00000019019	Fitm1	0.960908	2.18156e-39	5.22017e-38
ENSRNOG00000033403	Krt82	-6.61701	2.37058e-39	5.66537e-38
ENSRNOG00000018680	Rpl17	0.555678	2.67679e-39	6.38916e-38
ENSRNOG00000014350	Cyr61	-0.529602	2.76137e-39	6.58282e-38
ENSRNOG00000020792	Etv4	-1.12985	3.55001e-39	8.4523e-38
ENSRNOG00000016630	Tln1	-0.421526	4.0922e-39	9.73109e-38
ENSRNOG00000018414	Csf1r	-0.507455	4.51076e-39	1.07131e-37
ENSRNOG00000001300	P2rx4	-0.725064	5.14362e-39	1.22009e-37
ENSRNOG00000043098	Mt2A	-0.756664	8.01989e-39	1.9e-37
ENSRNOG00000026679	Scn4b	1.13589	8.82683e-39	2.08858e-37
ENSRNOG00000004281	Cobl	1.26062	9.05293e-39	2.13943e-37
ENSRNOG00000010947	Mmp14	-0.361374	9.82145e-39	2.31818e-37
ENSRNOG00000048831	Sowahc	-1.0081	1.25226e-38	2.9521e-37
ENSRNOG00000018159	Anxa4	-0.557643	1.28392e-38	3.023e-37
ENSRNOG00000018774	Rps14	0.510885	1.30316e-38	3.0645e-37
ENSRNOG00000003357	Col3a1	0.276865	1.7414e-38	4.09004e-37
novel.238	-	-2.78699	1.84111e-38	4.31891e-37
ENSRNOG00000002810	Gfpt2	0.855034	2.2303e-38	5.22546e-37
ENSRNOG00000001469	Eln	0.426578	2.3621e-38	5.52749e-37
ENSRNOG00000003463	Srebf1	0.683051	2.85485e-38	6.67238e-37
ENSRNOG00000015089	Mcoln2	-2.12409	3.20534e-38	7.48239e-37
ENSRNOG00000047606	Bcl2a1	-1.02979	3.58669e-38	8.36238e-37
ENSRNOG00000058039	Acta2	-0.402603	3.66402e-38	8.53225e-37
ENSRNOG00000016936	Nadk	-0.55215	4.07491e-38	9.47752e-37
ENSRNOG00000012723	Trim55	1.4602	4.60953e-38	1.07079e-36
ENSRNOG00000007740	Tacstd2	-0.908004	5.82064e-38	1.35049e-36
ENSRNOG00000060753	Esyt1	-0.539342	7.41757e-38	1.71891e-36
ENSRNOG00000022784	Fzd10	-1.3898	8.22918e-38	1.90468e-36
ENSRNOG00000011857	Mtpn	-0.76372	8.28934e-38	1.91628e-36
ENSRNOG00000051372	Mycn	-1.35814	9.16962e-38	2.11722e-36
ENSRNOG00000021157	Ctss	-0.596853	9.29549e-38	2.14369e-36
ENSRNOG00000019622	Ackr3	0.857335	9.92152e-38	2.2853e-36
ENSRNOG00000050968	Ptger2	-1.58185	1.12047e-37	2.57776e-36
ENSRNOG00000014776	Adcy7	-0.838019	1.4e-37	3.21698e-36
ENSRNOG00000014137	Fbln1	0.632104	1.41992e-37	3.25881e-36
ENSRNOG00000009845	Acadm	0.594734	1.42196e-37	3.25959e-36
ENSRNOG00000020716	Axl	0.467093	1.75376e-37	4.01536e-36
ENSRNOG00000043348	Rpl39	0.703215	2.13289e-37	4.87755e-36
ENSRNOG00000014791	Peg3	0.554928	2.18132e-37	4.98233e-36
ENSRNOG00000014928	Apba1	-1.32691	2.54517e-37	5.80645e-36
ENSRNOG00000032994	Myom3	1.22361	2.76582e-37	6.30231e-36
ENSRNOG00000029768	Ccl12	2.82094	3.4738e-37	7.9061e-36
ENSRNOG00000019283	P2ry2	-1.014	3.53902e-37	8.04495e-36
ENSRNOG00000062252	Hmcn2	0.835613	3.62102e-37	8.22157e-36
ENSRNOG00000006830	Tgm6	-3.36923	4.83091e-37	1.09556e-35
ENSRNOG00000007437	Irf5	-0.71644	5.39734e-37	1.22257e-35
ENSRNOG00000006472	Hspa2	-1.02272	6.13597e-37	1.38823e-35
ENSRNOG00000018233	Gas6	-0.382617	7.25252e-37	1.6389e-35
ENSRNOG00000042620	Marveld1	-0.520351	7.85785e-37	1.77359e-35
ENSRNOG00000010068	Plpp7	1.01385	8.0107e-37	1.80596e-35
ENSRNOG00000008465	Tmem176b	-0.534299	8.30028e-37	1.86903e-35
ENSRNOG00000030285	Epha3	1.68188	9.10688e-37	2.04824e-35
ENSRNOG00000005690	Lmcd1	0.941015	9.36783e-37	2.10446e-35
ENSRNOG00000017283	Kcnt1	1.71464	1.10261e-36	2.47407e-35
ENSRNOG00000024181	Tpsab1	2.33858	1.31299e-36	2.94267e-35
ENSRNOG00000001807	Sspn	1.24631	1.31513e-36	2.94401e-35
ENSRNOG00000016580	Rps23	0.488261	1.39818e-36	3.12625e-35
ENSRNOG00000007830	Apold1	-0.645289	1.70253e-36	3.80231e-35
ENSRNOG00000061403	Tlr13	-1.00096	2.29532e-36	5.12023e-35
ENSRNOG00000002218	Stbd1	1.04454	2.43907e-36	5.43455e-35
ENSRNOG00000021170	Plekho1	-0.673933	2.93277e-36	6.52696e-35
ENSRNOG00000020703	Sipa1l3	-0.710477	3.24773e-36	7.21949e-35
ENSRNOG00000033531	Cacna2d1	0.951852	3.34576e-36	7.42875e-35
ENSRNOG00000019057	Prkcq	1.39129	3.79375e-36	8.41367e-35
ENSRNOG00000006855	Padi4	-2.41802	3.82412e-36	8.47118e-35
ENSRNOG00000011927	Sdc3	-0.77783	4.37295e-36	9.67572e-35
ENSRNOG00000010588	Tns2	0.607666	5.06344e-36	1.11906e-34
ENSRNOG00000028238	Sh3bgr	0.67882	5.10154e-36	1.12617e-34
ENSRNOG00000011228	Layn	-1.17829	6.53217e-36	1.44032e-34
ENSRNOG00000001519	Dlx2	-1.76599	7.50374e-36	1.65264e-34
ENSRNOG00000018145	Crat	0.653869	7.57353e-36	1.66609e-34
ENSRNOG00000017194	Prdx1	-0.6032	8.69256e-36	1.91006e-34
ENSRNOG00000004959	Actr2	-0.530371	9.88441e-36	2.16946e-34
ENSRNOG00000031233	Mapk12	1.00445	1.07946e-35	2.3665e-34
novel.1173	-	1.96144	1.40303e-35	3.07234e-34
ENSRNOG00000020982	LOC687780	0.482139	1.45949e-35	3.19231e-34
ENSRNOG00000000130	Dnajb5	0.818143	1.6384e-35	3.57954e-34
ENSRNOG00000021242	Adam33	0.679391	1.64124e-35	3.58165e-34
ENSRNOG00000007495	Smpx	1.25264	1.7946e-35	3.91186e-34
ENSRNOG00000016384	Pik3cb	-1.39151	2.11859e-35	4.61282e-34
ENSRNOG00000052583	Zfp106	0.648173	2.42804e-35	5.28057e-34
ENSRNOG00000004217	Stk10	-0.973653	2.48309e-35	5.39414e-34
ENSRNOG00000013167	Hmgb2l1	-0.7116	2.86803e-35	6.2233e-34
ENSRNOG00000009433	Mcub	-2.62669	2.89987e-35	6.28525e-34
ENSRNOG00000001815	Eif4a2	0.528911	3.37709e-35	7.31128e-34
ENSRNOG00000055305	Parvb	-0.567701	3.51765e-35	7.60697e-34
ENSRNOG00000010181	Clec4d	-1.70679	4.30923e-35	9.30822e-34
ENSRNOG00000014879	Ttc7a	-0.710986	4.31855e-35	9.31782e-34
ENSRNOG00000057058	Cd300a	-1.18305	8.1576e-35	1.75812e-33
ENSRNOG00000010448	Ptbp1	-0.467661	8.75407e-35	1.88454e-33
novel.1014	-	0.392588	1.00045e-34	2.1513e-33
ENSRNOG00000019977	Ptprf	-0.502846	1.07133e-34	2.30113e-33
ENSRNOG00000052017	Dio3	-2.89834	1.09482e-34	2.34894e-33
ENSRNOG00000036960	Abcc9	0.711509	1.24452e-34	2.66712e-33
ENSRNOG00000046482	Znf750	-1.75549	1.26089e-34	2.69918e-33
ENSRNOG00000018795	Rpl18a	0.412051	1.4795e-34	3.16362e-33
ENSRNOG00000005792	Ankef1	1.93196	1.76793e-34	3.77614e-33
ENSRNOG00000004060	Calm3	-0.414712	2.52412e-34	5.38527e-33
ENSRNOG00000016242	Fzd1	-0.539526	2.77019e-34	5.90366e-33
novel.752	-	1.0774	2.95004e-34	6.27993e-33
ENSRNOG00000020173	Tie1	-0.462613	3.13062e-34	6.65693e-33
ENSRNOG00000015658	Sorbs1	1.10958	3.14084e-34	6.67122e-33
ENSRNOG00000013309	Pik3ap1	-0.735791	3.25747e-34	6.90928e-33
ENSRNOG00000005413	Creb3l1	-0.525589	3.26015e-34	6.90928e-33
ENSRNOG00000016294	Cd4	-0.64728	3.33141e-34	7.05247e-33
ENSRNOG00000006108	Gngt2	-1.0723	3.43291e-34	7.2593e-33
ENSRNOG00000034190	-	0.632249	3.62911e-34	7.66569e-33
ENSRNOG00000001010	Tecpr1	-0.706451	4.04752e-34	8.54004e-33
ENSRNOG00000012349	Mesdc1	-0.624414	4.67597e-34	9.85515e-33
ENSRNOG00000016411	Rps12	0.489028	4.86584e-34	1.0244e-32
ENSRNOG00000017644	Usp6nl	-0.839164	5.64445e-34	1.18701e-32
ENSRNOG00000020546	Lipe	0.608063	5.94219e-34	1.24825e-32
ENSRNOG00000040063	Krtap22-2	-4.68697	6.6619e-34	1.39693e-32
ENSRNOG00000008336	Tnfrsf11b	0.980096	6.66457e-34	1.39693e-32
ENSRNOG00000001424	Cux1	-0.999544	8.74317e-34	1.8306e-32
ENSRNOG00000012966	Acadl	0.712782	9.11239e-34	1.90582e-32
ENSRNOG00000052357	Fosl2	-0.821648	9.62858e-34	2.01157e-32
ENSRNOG00000018796	Herpud1	0.687539	1.0303e-33	2.15013e-32
ENSRNOG00000037371	XAF1	1.34524	1.24645e-33	2.59835e-32
ENSRNOG00000008245	Ptgis	1.78205	1.2565e-33	2.61646e-32
ENSRNOG00000005960	RGD1311744	1.24127	1.26593e-33	2.63322e-32
ENSRNOG00000009610	Tchhl1	-5.19756	1.46498e-33	3.04393e-32
ENSRNOG00000006224	Klhl31	0.663466	1.73175e-33	3.59433e-32
ENSRNOG00000059116	Cux1	-0.822447	1.88164e-33	3.90118e-32
ENSRNOG00000043094	Oxct1	-0.657813	1.94124e-33	4.02038e-32
ENSRNOG00000016062	Snta1	0.775804	2.23378e-33	4.62123e-32
ENSRNOG00000014272	Rpl35	0.436967	2.62842e-33	5.43179e-32
ENSRNOG00000043095	Etv3	-0.723095	2.69115e-33	5.5554e-32
ENSRNOG00000018247	Dhx58	0.893401	2.75426e-33	5.67955e-32
ENSRNOG00000023628	Tmem106a	0.941508	2.79103e-33	5.74915e-32
ENSRNOG00000014060	Mras	-0.740593	3.11526e-33	6.41012e-32
ENSRNOG00000009102	Fermt2	0.518976	3.27285e-33	6.72714e-32
ENSRNOG00000009773	Elovl4	0.549997	3.33086e-33	6.839e-32
ENSRNOG00000017431	RGD1304884	-0.839678	3.9454e-33	8.09209e-32
ENSRNOG00000029871	Slc8a3	1.43029	4.54935e-33	9.32079e-32
ENSRNOG00000012062	Npc2	-0.366535	5.05357e-33	1.03428e-31
ENSRNOG00000005608	Tead4	1.0086	5.29669e-33	1.08287e-31
ENSRNOG00000056714	Sla	-1.16675	5.44019e-33	1.11102e-31
ENSRNOG00000005046	Tspan13	0.686714	5.62133e-33	1.14679e-31
ENSRNOG00000053047	Top2a	-0.887604	7.15169e-33	1.45743e-31
ENSRNOG00000018584	LOC100359583	-0.470904	8.02185e-33	1.63302e-31
ENSRNOG00000015967	Sh3bgrl3	-0.565342	8.77968e-33	1.78539e-31
ENSRNOG00000014161	Rbm15b	-0.815399	8.98417e-33	1.82503e-31
ENSRNOG00000028077	Cfap44	-2.5426	9.58529e-33	1.94507e-31
ENSRNOG00000005082	Irf6	-0.934187	1.13655e-32	2.30386e-31
ENSRNOG00000051619	Asb2	1.0252	1.26003e-32	2.55146e-31
ENSRNOG00000005695	Mgp	0.493329	1.49229e-32	3.01857e-31
ENSRNOG00000011905	Atp6v1e1	-0.685403	1.54738e-32	3.12669e-31
ENSRNOG00000004725	Cela1	-2.52786	1.59811e-32	3.22578e-31
ENSRNOG00000021262	Slc23a2	-0.831274	1.61058e-32	3.24753e-31
ENSRNOG00000011222	Dynll1	-0.453191	1.63387e-32	3.29101e-31
ENSRNOG00000009222	Epha2	-0.740045	1.66284e-32	3.34582e-31
ENSRNOG00000058446	Il7r	-1.64169	1.77046e-32	3.55863e-31
ENSRNOG00000000655	Ptprc	-0.566649	1.81849e-32	3.65132e-31
ENSRNOG00000007159	Ccl2	0.972705	1.97201e-32	3.95541e-31
ENSRNOG00000003223	Degs1	-0.589445	2.11946e-32	4.24671e-31
ENSRNOG00000016526	Dsg2	-1.13063	2.15572e-32	4.31482e-31
ENSRNOG00000003536	Rufy1	-0.798763	3.19792e-32	6.39416e-31
ENSRNOG00000009355	Ogfr	0.661008	3.72919e-32	7.44864e-31
ENSRNOG00000004048	Lrrk2	-0.854137	3.75044e-32	7.48325e-31
ENSRNOG00000036762	Itpripl2	-0.994714	4.33256e-32	8.63572e-31
ENSRNOG00000000488	Hmga1	-0.718688	5.43143e-32	1.08147e-30
ENSRNOG00000014064	Ctsh	0.452444	5.79591e-32	1.15284e-30
ENSRNOG00000005246	Tfap2c	-0.898641	6.4707e-32	1.28572e-30
ENSRNOG00000003486	Mnda	0.714879	7.60857e-32	1.51025e-30
ENSRNOG00000003998	Sgca	0.865349	8.57218e-32	1.69975e-30
ENSRNOG00000049942	RGD1564899	0.889474	9.19491e-32	1.82134e-30
ENSRNOG00000033026	Dclk3	-1.7258	9.49014e-32	1.87787e-30
ENSRNOG00000028426	Mcf2l	0.651711	9.98879e-32	1.97449e-30
ENSRNOG00000000431	Atf6b	-0.554011	1.01236e-31	1.99907e-30
ENSRNOG00000011526	Pcsk6	1.15203	1.36718e-31	2.69693e-30
ENSRNOG00000000247	Mfsd11	-0.755561	1.68374e-31	3.31796e-30
ENSRNOG00000026053	Grem1	-0.925389	2.30248e-31	4.53256e-30
ENSRNOG00000014956	Slc11a1	-0.78262	2.47322e-31	4.86365e-30
ENSRNOG00000024603	Rps15	0.396907	2.49607e-31	4.90355e-30
ENSRNOG00000046366	Dmd	0.73606	2.62203e-31	5.1457e-30
ENSRNOG00000004107	Rpl23	0.454717	2.76972e-31	5.42996e-30
ENSRNOG00000020991	Ms4a6a	1.21742	3.41478e-31	6.68772e-30
ENSRNOG00000059660	AABR07065531.5	0.595732	3.58478e-31	7.01345e-30
ENSRNOG00000016037	Mafb	-0.523355	4.1481e-31	8.10727e-30
ENSRNOG00000002947	Dpt	0.356695	4.28573e-31	8.36768e-30
ENSRNOG00000014259	Mycl	-0.918737	4.90576e-31	9.56848e-30
ENSRNOG00000010386	H2afx	-0.714488	5.52116e-31	1.07578e-29
ENSRNOG00000006471	Pvalb	-0.358973	5.86092e-31	1.14082e-29
ENSRNOG00000023760	Plekhm3	-1.74503	6.39511e-31	1.24353e-29
ENSRNOG00000049994	Ifi44l	1.32586	6.47114e-31	1.25703e-29
ENSRNOG00000014656	Cox8b	1.17415	8.31953e-31	1.61445e-29
ENSRNOG00000031979	Mt-atp6	-0.320431	9.14969e-31	1.77374e-29
ENSRNOG00000046663	LOC100911825	-1.24714	9.98912e-31	1.93451e-29
ENSRNOG00000017716	Ucp3	1.39073	1.25736e-30	2.43254e-29
ENSRNOG00000006992	Rpl7	0.308972	1.31571e-30	2.54286e-29
ENSRNOG00000061394	Clec4e	-1.84771	1.5698e-30	3.03087e-29
ENSRNOG00000055583	Ttyh3	-0.421809	2.03012e-30	3.91568e-29
ENSRNOG00000008736	Slamf8	-0.975041	2.21235e-30	4.26285e-29
ENSRNOG00000026716	Rpl9	0.390912	2.42172e-30	4.66157e-29
ENSRNOG00000019106	Rps17	0.399013	2.76931e-30	5.32527e-29
ENSRNOG00000016090	Mtmr10	-0.801473	3.03684e-30	5.83385e-29
ENSRNOG00000021062	Fxyd5	-0.629198	3.18961e-30	6.12116e-29
ENSRNOG00000042886	Rps28	0.616751	3.60106e-30	6.90384e-29
ENSRNOG00000031789	Rangap1	-0.663586	3.78107e-30	7.24168e-29
ENSRNOG00000034191	Fmo1	2.14051	3.91612e-30	7.49281e-29
ENSRNOG00000016671	Dtna	1.67457	4.64013e-30	8.8692e-29
ENSRNOG00000012095	Pkia	0.875162	5.00775e-30	9.56229e-29
novel.512	-	-0.571077	5.18948e-30	9.89942e-29
ENSRNOG00000015522	Tfap2a	-0.920227	6.14124e-30	1.17033e-28
ENSRNOG00000015957	F13a1	1.24021	6.20816e-30	1.1819e-28
ENSRNOG00000015297	RGD1561662	-1.29076	7.67517e-30	1.45974e-28
ENSRNOG00000050420	Krt5	-0.297517	8.95422e-30	1.7013e-28
ENSRNOG00000003777	Chrne	1.6679	9.04663e-30	1.71715e-28
ENSRNOG00000009754	Nampt	0.665157	9.19756e-30	1.74407e-28
ENSRNOG00000013663	Tmem86a	-0.73586	9.38513e-30	1.77787e-28
ENSRNOG00000057347	Cebpb	-0.867719	9.87194e-30	1.86823e-28
novel.296	-	-0.838915	1.09496e-29	2.07013e-28
ENSRNOG00000026963	Hsp90b1	-0.458766	1.10628e-29	2.08945e-28
ENSRNOG00000000158	Cdo1	0.830152	1.17595e-29	2.21885e-28
novel.1119	-	-1.49662	1.27039e-29	2.39468e-28
ENSRNOG00000004712	Angptl1	0.880255	1.36984e-29	2.57959e-28
ENSRNOG00000020058	Celsr2	-0.659697	1.47366e-29	2.77238e-28
ENSRNOG00000016164	Fcrl2	-0.771226	1.65044e-29	3.10189e-28
ENSRNOG00000020679	Icam1	-0.631579	2.05361e-29	3.85582e-28
ENSRNOG00000017871	Sidt2	-0.492337	2.15111e-29	4.03492e-28
ENSRNOG00000016271	Itm2b	0.313689	2.23957e-29	4.19673e-28
ENSRNOG00000055439	Cln5	-1.47749	2.42908e-29	4.54737e-28
ENSRNOG00000016416	Rnh1	-0.522061	2.54932e-29	4.7678e-28
ENSRNOG00000002365	Itm2a	0.46678	2.68207e-29	5.01116e-28
ENSRNOG00000025155	Lmtk2	-0.742168	3.81455e-29	7.12012e-28
ENSRNOG00000018241	Ank1	0.963922	4.05862e-29	7.56829e-28
ENSRNOG00000023400	Dtx3l	0.940356	4.85999e-29	9.05381e-28
ENSRNOG00000028566	Pld4	0.597658	4.93119e-29	9.1775e-28
ENSRNOG00000055078	Cyp4b1	1.09261	5.27593e-29	9.80954e-28
ENSRNOG00000008555	Rps20	0.436324	5.32381e-29	9.88893e-28
ENSRNOG00000018092	Cd83	-1.02236	5.53785e-29	1.02765e-27
ENSRNOG00000001376	Mettl7a	0.659473	5.96752e-29	1.10631e-27
ENSRNOG00000010076	Pkp1	-0.482981	6.09226e-29	1.12834e-27
ENSRNOG00000057078	Ddit4	0.595955	6.34689e-29	1.17436e-27
ENSRNOG00000046333	Ablim1	0.642762	7.06702e-29	1.30634e-27
ENSRNOG00000015380	Jup	-0.456808	7.08176e-29	1.3078e-27
ENSRNOG00000033064	Edil3	-2.40984	7.84845e-29	1.44798e-27
ENSRNOG00000032825	Rpl30	0.428182	7.92037e-29	1.45984e-27
ENSRNOG00000001567	Krtap14	-6.42224	7.96521e-29	1.46669e-27
ENSRNOG00000027833	Fnip2	-0.875523	9.01462e-29	1.65832e-27
ENSRNOG00000004516	Itgbl1	0.838722	9.15072e-29	1.68174e-27
novel.466	-	1.91146	1.04689e-28	1.92216e-27
ENSRNOG00000033588	Siglec15	-2.5712	1.05898e-28	1.94249e-27
ENSRNOG00000006227	Ifih1	1.05077	1.15792e-28	2.12193e-27
ENSRNOG00000019999	Lypd3	-0.741445	1.22495e-28	2.24262e-27
ENSRNOG00000012036	Pcsk5	-0.962686	1.25611e-28	2.29746e-27
ENSRNOG00000012802	Tenm3	1.21826	1.48138e-28	2.70688e-27
ENSRNOG00000008479	Slc8a1	-0.941279	1.48338e-28	2.70795e-27
ENSRNOG00000054954	Nilr1	-1.54705	1.57939e-28	2.88046e-27
ENSRNOG00000014648	Efnb2	-0.653151	1.66297e-28	3.03001e-27
ENSRNOG00000008680	Loxl1	0.39167	1.6861e-28	3.06922e-27
ENSRNOG00000001276	Pcnt	0.694535	1.7493e-28	3.18122e-27
ENSRNOG00000028768	Gbp4	1.46428	2.04816e-28	3.72117e-27
ENSRNOG00000000459	Psmb9	0.736393	2.18895e-28	3.97319e-27
ENSRNOG00000019578	Rps16	0.377756	2.22004e-28	4.0258e-27
ENSRNOG00000010944	Hyou1	-0.638422	2.4266e-28	4.3962e-27
novel.1075	-	1.19935	2.68971e-28	4.86824e-27
ENSRNOG00000003289	Lap3	-0.480999	2.79722e-28	5.05805e-27
ENSRNOG00000025608	Lrat	-1.1121	2.91232e-28	5.26118e-27
ENSRNOG00000007241	Fnbp4	0.498423	2.91593e-28	5.26272e-27
ENSRNOG00000002093	Tgfbr3	0.471814	2.99584e-28	5.40184e-27
ENSRNOG00000046254	Adgre1	0.978318	3.24309e-28	5.84215e-27
ENSRNOG00000031540	LOC100362384	-1.20579	3.49053e-28	6.28197e-27
ENSRNOG00000010906	Ccl5	1.96612	3.91797e-28	7.0446e-27
ENSRNOG00000001570	LOC100363136	-4.64235	4.39447e-28	7.89392e-27
ENSRNOG00000018655	Adsl	0.660914	4.44359e-28	7.97466e-27
ENSRNOG00000011181	Cpa3	2.20109	4.5053e-28	8.07781e-27
ENSRNOG00000023614	Hsh2d	1.44443	4.54484e-28	8.14107e-27
ENSRNOG00000008144	Irf1	0.754881	4.66909e-28	8.35579e-27
ENSRNOG00000004932	Sel1l3	1.21832	4.7723e-28	8.5325e-27
ENSRNOG00000054186	Krtap1-5	-4.46896	4.82882e-28	8.62548e-27
ENSRNOG00000007706	Prkaa2	1.58884	5.01848e-28	8.95587e-27
ENSRNOG00000054548	Srpk3	1.2896	5.66026e-28	1.00918e-26
ENSRNOG00000004409	Sash3	-1.16691	6.24947e-28	1.11319e-26
ENSRNOG00000007955	Timp4	1.21367	6.36281e-28	1.13232e-26
ENSRNOG00000009719	C2cd2l	-0.713254	6.83591e-28	1.21538e-26
ENSRNOG00000003956	Arhgap6	-1.41911	7.1177e-28	1.2643e-26
ENSRNOG00000028505	Rps18	0.348306	9.62599e-28	1.70826e-26
ENSRNOG00000033617	Krt26	-3.29422	1.17168e-27	2.07737e-26
ENSRNOG00000014675	Pi4k2a	-0.982967	1.3765e-27	2.43825e-26
ENSRNOG00000010045	Clec4a	-1.56164	1.37858e-27	2.43966e-26
ENSRNOG00000011419	Aldh6a1	0.816185	1.43e-27	2.52831e-26
ENSRNOG00000060179	Gpc3	1.33805	1.59506e-27	2.81754e-26
ENSRNOG00000047503	Apoc3	-3.87169	1.91258e-27	3.37529e-26
ENSRNOG00000017676	Plvap	-0.415193	2.03828e-27	3.59382e-26
ENSRNOG00000014516	Hs6st1	-0.605378	2.05911e-27	3.62719e-26
ENSRNOG00000028624	Kif26b	-0.791683	2.25624e-27	3.97077e-26
ENSRNOG00000000986	Camsap3	-0.911528	2.65793e-27	4.67341e-26
ENSRNOG00000004878	Myf6	1.38791	2.7034e-27	4.74898e-26
ENSRNOG00000021031	Grn	-0.34262	2.95486e-27	5.18595e-26
ENSRNOG00000004196	Rps29	0.86741	2.96846e-27	5.20503e-26
ENSRNOG00000018225	Tp53inp2	-0.56681	3.03076e-27	5.3094e-26
ENSRNOG00000046168	Ppm1l	-0.685432	3.3352e-27	5.83736e-26
ENSRNOG00000003496	Tbc1d9	-0.897887	3.877e-27	6.77943e-26
ENSRNOG00000048222	Nlrc5	1.06023	4.30486e-27	7.52071e-26
ENSRNOG00000002926	Uap1	0.672012	4.53313e-27	7.91226e-26
ENSRNOG00000010350	Rcan2	1.17554	4.55473e-27	7.94269e-26
ENSRNOG00000039596	Prob1	1.07703	4.82132e-27	8.39992e-26
ENSRNOG00000030876	Krt72	-3.85987	5.02994e-27	8.7554e-26
ENSRNOG00000004049	Baiap2	-0.908618	5.17667e-27	9.0026e-26
ENSRNOG00000014371	Cdh13	0.412492	5.38282e-27	9.35259e-26
ENSRNOG00000047321	Hba-a2	0.370892	5.68193e-27	9.86331e-26
ENSRNOG00000004314	Ppm1h	-1.00016	5.73009e-27	9.93788e-26
ENSRNOG00000018184	Tpm1	0.285666	6.85129e-27	1.18716e-25
ENSRNOG00000030688	Lrrc2	1.95892	6.89146e-27	1.19304e-25
ENSRNOG00000010326	Col20a1	1.47267	7.87939e-27	1.36284e-25
novel.375	-	3.24936	9.21592e-27	1.59256e-25
ENSRNOG00000002693	Nme1	-0.724674	9.83305e-27	1.69767e-25
ENSRNOG00000056038	Ehbp1l1	0.360898	1.08749e-26	1.87585e-25
novel.318	-	1.42676	1.21899e-26	2.10079e-25
ENSRNOG00000025764	AC128848.1	-0.687029	1.40444e-26	2.41819e-25
ENSRNOG00000027894	Iqgap3	-1.09358	1.43563e-26	2.46967e-25
ENSRNOG00000032626	Mmp3	-1.65961	1.49848e-26	2.57546e-25
ENSRNOG00000016110	Kcnk12	-1.47646	1.54382e-26	2.651e-25
ENSRNOG00000018484	Plk3	-0.790576	1.78573e-26	3.06367e-25
novel.899	-	-2.20035	1.97641e-26	3.38776e-25
ENSRNOG00000005935	A3galt2	-0.682286	1.99395e-26	3.41475e-25
ENSRNOG00000003452	Asb9	1.57626	2.02479e-26	3.46445e-25
ENSRNOG00000033665	Mrgprx2	-1.96045	2.06495e-26	3.53e-25
ENSRNOG00000010880	Gpr27	-1.29219	2.07747e-26	3.54824e-25
ENSRNOG00000054561	Isg20	1.4382	2.21917e-26	3.78686e-25
ENSRNOG00000007237	Id2	-0.91768	2.23184e-26	3.80508e-25
ENSRNOG00000009080	Atp6v1d	-0.573028	2.274e-26	3.87351e-25
ENSRNOG00000008113	RGD1561149	-0.733101	2.74377e-26	4.66954e-25
ENSRNOG00000005934	Mlip	1.31555	2.77086e-26	4.71145e-25
ENSRNOG00000004904	Pa2g4	-0.551978	2.78648e-26	4.7338e-25
ENSRNOG00000021104	Emp3	-0.542247	2.84527e-26	4.82938e-25
ENSRNOG00000019336	Gata3	-1.00658	3.70654e-26	6.28198e-25
ENSRNOG00000046829	Kdr	0.571459	3.70767e-26	6.28198e-25
ENSRNOG00000029844	Akr1c2	1.48639	3.7343e-26	6.3215e-25
ENSRNOG00000020254	Per2	0.621077	4.01384e-26	6.78869e-25
novel.963	-	2.77614	4.12635e-26	6.9728e-25
ENSRNOG00000039110	Lsmem1	1.18354	4.26653e-26	7.2033e-25
novel.735	-	-3.92255	4.98369e-26	8.40667e-25
ENSRNOG00000006865	Laptm4a	0.338524	5.35507e-26	9.02516e-25
ENSRNOG00000013967	Blnk	-1.11226	5.8058e-26	9.77617e-25
ENSRNOG00000002227	Kit	-0.84665	6.4456e-26	1.08439e-24
ENSRNOG00000019118	Slc13a3	-1.64443	6.47208e-26	1.08789e-24
ENSRNOG00000011946	Ptn	-0.492272	6.61042e-26	1.11017e-24
ENSRNOG00000015082	Nlrp10	-1.7923	7.18272e-26	1.20522e-24
ENSRNOG00000019737	Sema4a	-0.741154	7.44183e-26	1.2476e-24
ENSRNOG00000018569	Ahcyl1	-0.536636	7.66025e-26	1.28309e-24
ENSRNOG00000025889	Gnas	1.69539	7.90589e-26	1.32308e-24
ENSRNOG00000008184	Esrp1	-0.718019	7.94773e-26	1.32891e-24
ENSRNOG00000002004	Prdm8	0.563503	8.92151e-26	1.49043e-24
ENSRNOG00000055564	RGD1564664	-0.452301	9.25561e-26	1.54489e-24
ENSRNOG00000049056	-	0.621716	9.6194e-26	1.60421e-24
ENSRNOG00000020918	Ccnd1	-0.520235	1.03082e-25	1.71758e-24
ENSRNOG00000001156	Msi1	-1.3054	1.10093e-25	1.83281e-24
ENSRNOG00000046848	PCOLCE2	1.44073	1.1271e-25	1.87474e-24
ENSRNOG00000004411	Tspan8	1.01915	1.30728e-25	2.17255e-24
ENSRNOG00000000924	Slc7a1	-0.743281	1.4847e-25	2.46525e-24
ENSRNOG00000022777	Six1	1.17247	1.70463e-25	2.82797e-24
ENSRNOG00000026306	Clec5a	-2.03373	1.85001e-25	3.06649e-24
ENSRNOG00000033697	Casp4	1.03739	1.87513e-25	3.10543e-24
ENSRNOG00000046547	Rbm24	1.14995	1.92207e-25	3.1804e-24
ENSRNOG00000054360	Tspan11	0.707183	2.22676e-25	3.68139e-24
ENSRNOG00000027456	Cdc42bpg	-0.658912	2.38521e-25	3.93992e-24
ENSRNOG00000005929	Them6	-1.54758	2.59216e-25	4.27806e-24
ENSRNOG00000009945	Pls1	-2.43746	2.76465e-25	4.5588e-24
ENSRNOG00000007047	Eps8	-0.67258	3.36465e-25	5.5434e-24
ENSRNOG00000026842	Nnt	0.54521	3.39466e-25	5.58801e-24
ENSRNOG00000023529	Rpl5	0.295249	3.48159e-25	5.72618e-24
ENSRNOG00000060329	Emb	-0.946726	3.66426e-25	6.02143e-24
ENSRNOG00000013201	Tex264	-0.606081	3.6888e-25	6.05654e-24
novel.360	-	1.96295	3.95951e-25	6.49544e-24
ENSRNOG00000002434	Tmem100	0.902382	4.02944e-25	6.60448e-24
ENSRNOG00000022173	Gatad2a	-0.46374	4.10193e-25	6.71753e-24
ENSRNOG00000007679	Cyth4	-0.591582	4.25241e-25	6.95799e-24
ENSRNOG00000006653	Slc38a4	1.01755	4.48887e-25	7.33861e-24
ENSRNOG00000007882	Ablim2	1.06842	4.66374e-25	7.61798e-24
ENSRNOG00000030862	Atp6v1h	-0.73166	4.73073e-25	7.72079e-24
ENSRNOG00000008012	Abcb1a	-0.962188	4.96467e-25	8.09567e-24
ENSRNOG00000045733	LOC298139	1.71797	4.99293e-25	8.13481e-24
ENSRNOG00000046607	Cited4	-1.32231	5.25832e-25	8.5599e-24
ENSRNOG00000005133	Mapt	1.3233	5.75963e-25	9.36798e-24
ENSRNOG00000027271	RGD1359290	0.341615	6.11045e-25	9.93013e-24
ENSRNOG00000011794	Tcea3	1.1183	6.23188e-25	1.01189e-23
novel.182	-	1.68915	6.30546e-25	1.02296e-23
ENSRNOG00000000697	Coro1c	-0.416339	7.86863e-25	1.27548e-23
ENSRNOG00000010421	Wdr91	-0.635477	7.88736e-25	1.27743e-23
ENSRNOG00000058568	Dhrs9	-1.29286	8.6706e-25	1.40309e-23
ENSRNOG00000015421	Slc27a3	0.620735	8.93491e-25	1.44464e-23
ENSRNOG00000016885	Klf6	-0.585464	9.29474e-25	1.50155e-23
ENSRNOG00000017808	Klf15	1.25215	1.07083e-24	1.72844e-23
ENSRNOG00000042353	Mlkl	0.943204	1.28727e-24	2.07604e-23
ENSRNOG00000031138	Irgm	0.849924	1.29735e-24	2.09053e-23
ENSRNOG00000019890	Folr2	-0.608828	1.30764e-24	2.10535e-23
ENSRNOG00000004279	Adgra3	-0.588572	1.33609e-24	2.14934e-23
ENSRNOG00000026087	Igfn1	1.00081	1.34857e-24	2.16759e-23
ENSRNOG00000013092	Lonrf3	-2.00881	1.44754e-24	2.32471e-23
ENSRNOG00000013000	Ldhb	0.729576	1.48967e-24	2.39035e-23
ENSRNOG00000014090	Retsat	0.536635	1.53404e-24	2.45949e-23
ENSRNOG00000026236	Morc3	0.640948	1.6396e-24	2.62652e-23
ENSRNOG00000012081	Txn1	-0.57751	1.8006e-24	2.88202e-23
ENSRNOG00000007230	Kank3	0.595482	1.85577e-24	2.96784e-23
ENSRNOG00000051706	Tep1	-0.436073	1.91003e-24	3.05206e-23
ENSRNOG00000003543	Gpr143	-3.28213	2.04243e-24	3.26089e-23
ENSRNOG00000049829	AABR07060872.1	0.576333	2.04601e-24	3.26387e-23
ENSRNOG00000020093	LOC100360573	0.580363	2.08966e-24	3.33073e-23
ENSRNOG00000004629	Fkbp3	0.695589	2.17562e-24	3.46485e-23
ENSRNOG00000016351	Frrs1	-0.943876	2.2206e-24	3.53353e-23
ENSRNOG00000012312	Prr9	-3.99323	2.23584e-24	3.55482e-23
ENSRNOG00000020345	Slc25a42	0.932613	2.27032e-24	3.60664e-23
ENSRNOG00000012659	Vamp5	0.973544	2.28634e-24	3.62906e-23
ENSRNOG00000037645	Tceal7	0.928387	2.32326e-24	3.68461e-23
ENSRNOG00000012868	Uaca	0.51157	2.36334e-24	3.74506e-23
ENSRNOG00000000599	Lama4	0.398946	2.37418e-24	3.75911e-23
ENSRNOG00000016846	Pik3cd	-0.508863	2.51107e-24	3.97256e-23
ENSRNOG00000013194	Rps6ka2	-0.660375	2.53785e-24	4.01161e-23
ENSRNOG00000027864	Ppia	-0.321834	2.9079e-24	4.59275e-23
ENSRNOG00000024899	Cxcl13	0.677837	2.94009e-24	4.63975e-23
ENSRNOG00000020595	Rps11	0.336941	3.61243e-24	5.69607e-23
ENSRNOG00000006859	Insig1	-0.646563	3.64485e-24	5.74244e-23
ENSRNOG00000021018	Batf2	2.98779	3.69475e-24	5.81627e-23
ENSRNOG00000000842	Ddah2	0.588554	4.25307e-24	6.68965e-23
ENSRNOG00000016684	Wnk2	0.847962	4.5077e-24	7.08433e-23
ENSRNOG00000027990	Crip1	-0.412177	4.70276e-24	7.3848e-23
ENSRNOG00000001607	Adamts1	-0.511545	4.89399e-24	7.67878e-23
ENSRNOG00000027503	Rps25	0.4242	5.6896e-24	8.91978e-23
ENSRNOG00000006231	Ptpro	-0.715207	6.36057e-24	9.9635e-23
ENSRNOG00000036603	Ifit1bl	2.19801	6.59596e-24	1.03238e-22
ENSRNOG00000054344	Ier2	-0.433811	7.87593e-24	1.2317e-22
ENSRNOG00000011513	Gla	-1.02837	8.04291e-24	1.25679e-22
ENSRNOG00000019721	Ypel3	0.493535	8.4403e-24	1.3178e-22
ENSRNOG00000016623	Tmeff2	1.4993	9.93842e-24	1.55044e-22
ENSRNOG00000002318	Limch1	0.818881	1.05702e-23	1.64765e-22
ENSRNOG00000008431	Gabbr2	-2.35383	1.05839e-23	1.64845e-22
ENSRNOG00000001214	Pfkl	-0.535405	1.07025e-23	1.66556e-22
novel.698	-	-1.13203	1.08764e-23	1.69124e-22
ENSRNOG00000014828	Avpi1	-0.654703	1.15399e-23	1.79296e-22
ENSRNOG00000014761	Rasd2	1.90923	1.35403e-23	2.10205e-22
ENSRNOG00000010681	Pitx2	1.45084	1.45568e-23	2.25802e-22
ENSRNOG00000024259	Tmem54	-1.37517	1.46949e-23	2.2776e-22
ENSRNOG00000022166	Ammecr1	-1.21532	2.12052e-23	3.28396e-22
ENSRNOG00000014336	Mcm5	-0.881802	2.21888e-23	3.43351e-22
ENSRNOG00000054989	Grhl1	-1.4109	2.22709e-23	3.44343e-22
ENSRNOG00000047213	Gnpda1	-0.771577	2.2492e-23	3.4748e-22
ENSRNOG00000019179	Ggta1	-0.624619	2.31866e-23	3.57921e-22
ENSRNOG00000046377	Btnl9	1.07961	2.40616e-23	3.71127e-22
ENSRNOG00000002396	Serpinb8	-0.909362	2.44399e-23	3.76658e-22
ENSRNOG00000001736	Bdh1	-1.1126	2.70946e-23	4.17235e-22
ENSRNOG00000032844	RT1-Da	0.320407	2.85586e-23	4.39425e-22
ENSRNOG00000003201	Rps4x	0.318021	2.91658e-23	4.48406e-22
ENSRNOG00000046905	Sgce	0.956079	3.04291e-23	4.67452e-22
ENSRNOG00000019627	Mybpc2	0.323919	3.31875e-23	5.09417e-22
ENSRNOG00000006137	Arid1a	-0.382461	3.41634e-23	5.23976e-22
ENSRNOG00000013508	Rpl31	0.346364	3.8235e-23	5.85953e-22
ENSRNOG00000007325	Usp28	0.700252	3.87165e-23	5.92856e-22
ENSRNOG00000023640	Rab25	-0.957587	3.93785e-23	6.0251e-22
ENSRNOG00000010473	Cand2	0.896893	4.02903e-23	6.15968e-22
ENSRNOG00000018517	Trim21	0.956476	4.53102e-23	6.92159e-22
ENSRNOG00000039976	Ptk7	-0.476612	4.79103e-23	7.31293e-22
ENSRNOG00000062279	Cln5	-1.57648	5.0259e-23	7.66531e-22
ENSRNOG00000055524	Trip10	0.516797	5.78533e-23	8.81651e-22
ENSRNOG00000033100	AABR07054189.1	-1.19193	5.79773e-23	8.82836e-22
ENSRNOG00000005678	Lamb1	0.358545	6.167e-23	9.38318e-22
ENSRNOG00000024998	Trps1	-1.30292	6.2234e-23	9.46145e-22
ENSRNOG00000003864	Gipc1	-0.431898	6.7851e-23	1.03072e-21
ENSRNOG00000018273	Ncl	-0.401728	7.35235e-23	1.116e-21
ENSRNOG00000012985	Pfdn5	0.562993	7.44658e-23	1.12931e-21
ENSRNOG00000011387	Tet3	-0.760443	7.45183e-23	1.12931e-21
ENSRNOG00000016848	Fzd4	0.478271	8.03766e-23	1.21712e-21
ENSRNOG00000015329	Kpna2	-0.625216	8.36661e-23	1.26593e-21
ENSRNOG00000010034	Asah1	-0.526489	8.46245e-23	1.27942e-21
ENSRNOG00000000479	Kifc1	-0.907207	8.83754e-23	1.33507e-21
ENSRNOG00000013862	Dusp2	-1.13675	9.67644e-23	1.46065e-21
ENSRNOG00000047697	Ggt1	-3.13464	9.68562e-23	1.46088e-21
ENSRNOG00000005659	Aurkb	-0.905666	1.03652e-22	1.56215e-21
ENSRNOG00000017602	Il34	0.925496	1.05391e-22	1.5871e-21
ENSRNOG00000005248	Slc1a4	-0.836088	1.09739e-22	1.65127e-21
ENSRNOG00000056836	Cav1	0.309261	1.16847e-22	1.75684e-21
ENSRNOG00000040050	AABR07033590.1	-4.38892	1.19638e-22	1.7974e-21
ENSRNOG00000000456	Psmb8	0.924171	1.21693e-22	1.82683e-21
ENSRNOG00000018599	Gga2	-0.734082	1.24972e-22	1.87458e-21
ENSRNOG00000020980	AABR07006278.1	1.80166	1.25991e-22	1.88839e-21
ENSRNOG00000011260	Cmbl	1.42994	1.27292e-22	1.90638e-21
ENSRNOG00000061038	Myh15	1.25388	1.27545e-22	1.90868e-21
ENSRNOG00000007300	C1qtnf6	-0.40869	1.32164e-22	1.97625e-21
novel.759	-	-2.35876	1.44623e-22	2.16085e-21
ENSRNOG00000010938	Slc7a10	1.44487	1.59389e-22	2.37961e-21
ENSRNOG00000021166	Ecm1	0.435863	1.64692e-22	2.45687e-21
ENSRNOG00000038044	Tsc22d2	-0.695544	1.69393e-22	2.52502e-21
ENSRNOG00000000723	RT1-CE5	1.30217	1.73415e-22	2.58296e-21
ENSRNOG00000006079	Psd4	-0.830679	1.97656e-22	2.94173e-21
ENSRNOG00000007304	Herc3	0.900383	2.12443e-22	3.15935e-21
ENSRNOG00000053384	Bmp7	-0.958436	2.14724e-22	3.19078e-21
ENSRNOG00000028108	Cytl1	1.06832	2.18743e-22	3.24797e-21
ENSRNOG00000005917	Pawr	-0.698892	2.19953e-22	3.2634e-21
novel.110	-	1.42723	2.67378e-22	3.96396e-21
ENSRNOG00000015642	Pabpc4	0.36594	2.98022e-22	4.41484e-21
ENSRNOG00000005279	Ndufaf7	-1.17818	3.43385e-22	5.08289e-21
ENSRNOG00000004757	Tmem158	0.651395	3.48789e-22	5.15889e-21
ENSRNOG00000024022	Ndfip2	-0.533128	3.5144e-22	5.19407e-21
ENSRNOG00000006532	H3f3b	-0.269254	3.7948e-22	5.60416e-21
ENSRNOG00000005390	Nup210	-0.938367	4.13927e-22	6.10814e-21
ENSRNOG00000015829	Trpm1	-2.14406	4.56218e-22	6.72701e-21
ENSRNOG00000009980	Plpp1	0.505991	4.57403e-22	6.73928e-21
ENSRNOG00000015774	Mreg	-0.813382	4.75424e-22	6.9994e-21
ENSRNOG00000011893	Rps3a	0.334405	5.43789e-22	7.99974e-21
ENSRNOG00000002722	Sec14l1	-0.404506	5.86108e-22	8.61565e-21
ENSRNOG00000000435	Ppt2	-0.5901	6.4547e-22	9.48096e-21
ENSRNOG00000007069	Adhfe1	2.18361	6.8807e-22	1.00989e-20
ENSRNOG00000009460	Pdzd8	-0.629027	7.32686e-22	1.07455e-20
ENSRNOG00000033694	Klf16	-0.607198	7.53451e-22	1.10416e-20
ENSRNOG00000053468	Tuba1b	-0.318671	7.77282e-22	1.13821e-20
ENSRNOG00000009341	Hivep3	-1.18798	8.60069e-22	1.25847e-20
ENSRNOG00000020533	Htra1	-0.248874	8.77566e-22	1.28309e-20
ENSRNOG00000007999	Abra	1.1117	8.93325e-22	1.30513e-20
ENSRNOG00000017484	Gja5	1.0411	9.26277e-22	1.35224e-20
ENSRNOG00000057852	Cacng6	1.42281	9.65911e-22	1.40902e-20
ENSRNOG00000003078	Dcaf6	0.545638	9.78353e-22	1.42608e-20
ENSRNOG00000021259	Prnp	0.34367	9.90419e-22	1.44257e-20
ENSRNOG00000010986	Cmtm7	-0.62607	1.02557e-21	1.49263e-20
ENSRNOG00000016763	Fgfr4	1.16952	1.096e-21	1.59391e-20
ENSRNOG00000008056	Ankrd9	0.796709	1.16644e-21	1.69506e-20
novel.166	-	3.46693	1.26971e-21	1.84374e-20
ENSRNOG00000002244	Pdgfra	0.428235	1.3126e-21	1.90457e-20
ENSRNOG00000020956	Bcat2	0.525737	1.46039e-21	2.1174e-20
ENSRNOG00000000938	Ran	-0.426945	1.57946e-21	2.2883e-20
ENSRNOG00000059538	Clec2g	0.400167	1.60232e-21	2.31966e-20
ENSRNOG00000001924	Tp63	-0.539031	1.61278e-21	2.33303e-20
ENSRNOG00000057710	Ccnd2	-0.669992	1.6997e-21	2.4569e-20
ENSRNOG00000001700	Whrn	-0.889501	1.72228e-21	2.48766e-20
ENSRNOG00000018556	Tomm40	-0.647015	1.95708e-21	2.82467e-20
novel.1157	-	1.71653	2.06339e-21	2.97586e-20
ENSRNOG00000017146	Nfatc1	-0.55154	2.0719e-21	2.98588e-20
ENSRNOG00000016043	Aqp4	1.6635	2.18884e-21	3.15203e-20
ENSRNOG00000022540	Trex1	0.756997	2.26446e-21	3.25846e-20
ENSRNOG00000052968	Hnrnpa3	-0.382211	2.31185e-21	3.32416e-20
novel.931	-	-0.411209	2.35723e-21	3.38496e-20
ENSRNOG00000025219	RGD1559622	0.740312	2.35768e-21	3.38496e-20
ENSRNOG00000030034	Sox11	1.517	2.38128e-21	3.41627e-20
ENSRNOG00000047314	Tk1	-0.886406	2.66849e-21	3.82544e-20
ENSRNOG00000049537	Rn50_13_0828.1	-0.645007	2.89816e-21	4.15156e-20
ENSRNOG00000018461	Pdgfrb	0.334847	2.94296e-21	4.21258e-20
ENSRNOG00000057558	AC128792.2	-0.936757	3.09001e-21	4.41975e-20
ENSRNOG00000026548	Dhrs7c	0.874944	3.16977e-21	4.53044e-20
ENSRNOG00000047768	Lamb2	0.300177	3.20668e-21	4.57977e-20
ENSRNOG00000001528	Gap43	1.33079	3.22025e-21	4.59572e-20
ENSRNOG00000015158	Pikfyve	-0.552513	3.29566e-21	4.69982e-20
ENSRNOG00000017941	Optn	-0.490046	3.30954e-21	4.71609e-20
ENSRNOG00000060524	AABR07030366.1	1.20581	3.98703e-21	5.67728e-20
ENSRNOG00000006384	Ddx58	1.1026	4.04652e-21	5.7577e-20
ENSRNOG00000030264	Fam83h	-0.685416	4.23982e-21	6.02825e-20
ENSRNOG00000012991	Adgra2	0.407449	4.41111e-21	6.26713e-20
ENSRNOG00000025094	Gpr183	-1.32867	4.62695e-21	6.56889e-20
ENSRNOG00000031890	Ncam1	0.601633	4.67683e-21	6.63477e-20
ENSRNOG00000017469	Anxa1	-0.321631	4.70942e-21	6.67605e-20
ENSRNOG00000028415	Cdc20	-0.914415	5.06545e-21	7.17543e-20
ENSRNOG00000011523	H2afy	-0.445621	5.19069e-21	7.34739e-20
ENSRNOG00000014214	Rpl27a	0.357044	5.2285e-21	7.39542e-20
ENSRNOG00000019854	Napsa	-0.74375	5.36354e-21	7.58081e-20
ENSRNOG00000060775	Lmo7	0.538685	5.69876e-21	8.04865e-20
ENSRNOG00000001578	Hoxd4	0.930496	5.85852e-21	8.26818e-20
ENSRNOG00000025895	Sdpr	0.651316	6.20997e-21	8.75771e-20
ENSRNOG00000045560	LOC499229	1.35342	6.37891e-21	8.98932e-20
ENSRNOG00000033316	Foxo4	0.595884	6.97607e-21	9.8236e-20
ENSRNOG00000018044	Phyh	0.676657	7.37808e-21	1.03821e-19
ENSRNOG00000000248	Srsf2	-0.297714	7.59431e-21	1.06785e-19
ENSRNOG00000003108	Acbd4	0.740923	8.10425e-21	1.13871e-19
ENSRNOG00000047218	Clic5	0.735147	8.56366e-21	1.20238e-19
ENSRNOG00000002794	Selp	-1.06414	8.59838e-21	1.20636e-19
ENSRNOG00000036745	Gna13	-0.505755	8.93636e-21	1.25286e-19
ENSRNOG00000011329	Pkm	-0.281191	9.41703e-21	1.31928e-19
ENSRNOG00000001170	Cox6a1	-0.380568	9.63819e-21	1.34928e-19
ENSRNOG00000002632	Naca	0.319712	9.70412e-21	1.35751e-19
ENSRNOG00000024346	Plet1	-1.18069	1.05025e-20	1.46812e-19
ENSRNOG00000021412	Slfn13	0.447115	1.07035e-20	1.49512e-19
ENSRNOG00000054172	Ctnnb1	-0.352721	1.10075e-20	1.53647e-19
ENSRNOG00000000257	Smpd3	1.13758	1.10444e-20	1.54049e-19
ENSRNOG00000017525	Epha1	-0.853805	1.17239e-20	1.63408e-19
ENSRNOG00000058805	Aida	0.496018	1.31297e-20	1.82868e-19
ENSRNOG00000017869	Irf8	0.465156	1.33739e-20	1.86133e-19
ENSRNOG00000003172	Serpinf1	0.311415	1.43117e-20	1.9904e-19
ENSRNOG00000056069	Kif11	-1.02312	1.54274e-20	2.144e-19
ENSRNOG00000025731	Ptma	-0.587925	1.55795e-20	2.16357e-19
ENSRNOG00000003917	Uck2	-0.970367	1.61189e-20	2.23685e-19
ENSRNOG00000003359	Ogt	0.407092	1.61852e-20	2.24441e-19
ENSRNOG00000056756	Actn1	-0.337787	1.6289e-20	2.25717e-19
ENSRNOG00000017226	Slc2a4	0.672093	1.71106e-20	2.36931e-19
ENSRNOG00000045670	Tnfsf12	-0.496763	1.75273e-20	2.42525e-19
ENSRNOG00000018454	Apoe	-0.254072	1.7588e-20	2.43188e-19
ENSRNOG00000017438	Gfra1	1.27909	1.92721e-20	2.66281e-19
ENSRNOG00000020105	Klhl30	0.998645	2.02764e-20	2.79955e-19
ENSRNOG00000042230	RGD1307182	-1.54477	2.1639e-20	2.98553e-19
ENSRNOG00000005424	Odc1	-0.484365	2.18458e-20	3.01188e-19
ENSRNOG00000057880	Myh11	0.301567	2.31446e-20	3.18864e-19
ENSRNOG00000011789	Cdon	0.592109	2.52168e-20	3.47162e-19
ENSRNOG00000055962	Bgn	0.253684	2.62877e-20	3.61645e-19
novel.830	-	-0.797664	2.98219e-20	4.09971e-19
ENSRNOG00000013987	Sbno2	-0.354057	3.01661e-20	4.14404e-19
ENSRNOG00000020744	Adar	0.51217	3.1264e-20	4.29177e-19
ENSRNOG00000012772	Nqo1	-0.841609	3.14876e-20	4.31936e-19
ENSRNOG00000019048	Sod2	-0.386456	3.19202e-20	4.37557e-19
ENSRNOG00000011016	Slc7a2	-0.785075	3.26752e-20	4.47584e-19
ENSRNOG00000016512	Sema3b	0.51628	3.27139e-20	4.47794e-19
ENSRNOG00000016810	Stmn1	-0.530246	3.28706e-20	4.49617e-19
ENSRNOG00000001223	Pttg1ip	-0.400487	3.37026e-20	4.60666e-19
ENSRNOG00000013581	Extl3	-0.703588	3.40318e-20	4.64833e-19
ENSRNOG00000019277	Vdac3	0.404294	3.44248e-20	4.69865e-19
ENSRNOG00000040151	Sdr16c6	0.761994	3.70668e-20	5.05564e-19
ENSRNOG00000000774	Gabbr1	0.496237	3.91299e-20	5.33323e-19
ENSRNOG00000031232	Nrp2	-0.455603	4.02277e-20	5.47895e-19
ENSRNOG00000013774	Lmnb1	-0.746384	4.17592e-20	5.68348e-19
ENSRNOG00000042771	Apol3	0.930029	4.25131e-20	5.78196e-19
ENSRNOG00000017063	Fcna	0.832955	4.54892e-20	6.18232e-19
ENSRNOG00000017695	AABR07012795.1	-0.821245	5.50092e-20	7.47084e-19
ENSRNOG00000043219	Fbn2	-0.500995	5.74792e-20	7.80075e-19
ENSRNOG00000016890	Tppp3	0.485937	5.87811e-20	7.97177e-19
ENSRNOG00000030880	Hs6st2	2.46419	6.05112e-20	8.20058e-19
ENSRNOG00000029500	Tapbp	0.512241	6.07538e-20	8.22762e-19
ENSRNOG00000001719	Psmd2	-0.319698	6.21433e-20	8.40983e-19
ENSRNOG00000019383	Tef	0.453113	6.33801e-20	8.57112e-19
ENSRNOG00000002141	Cd200	-0.469126	6.41258e-20	8.66583e-19
ENSRNOG00000015914	U2af2	-0.38671	6.47652e-20	8.74605e-19
ENSRNOG00000011421	Smap2	-0.457946	6.6955e-20	9.03538e-19
ENSRNOG00000048053	Rn50_10_0701.2	1.1381	6.79003e-20	9.15647e-19
ENSRNOG00000022419	Dok7	1.34817	7.28299e-20	9.81431e-19
ENSRNOG00000000529	Pim1	-0.831228	7.49213e-20	1.0089e-18
ENSRNOG00000006670	Rai2	1.46409	8.74017e-20	1.17614e-18
ENSRNOG00000015177	Sun2	-0.424987	1.01035e-19	1.35864e-18
ENSRNOG00000021118	Nomo1	0.421524	1.02578e-19	1.37808e-18
ENSRNOG00000057626	Kif1b	-0.287647	1.02626e-19	1.37808e-18
ENSRNOG00000030537	Slc26a11	-1.05854	1.07275e-19	1.43951e-18
ENSRNOG00000001148	Rplp0	0.268629	1.19625e-19	1.60409e-18
ENSRNOG00000007604	Igsf8	-0.545301	1.19971e-19	1.60762e-18
ENSRNOG00000050509	Ebi3	1.38648	1.2194e-19	1.63285e-18
ENSRNOG00000013023	Gltscr2	0.33689	1.28074e-19	1.71379e-18
ENSRNOG00000016619	Use1	0.489742	1.31099e-19	1.75303e-18
ENSRNOG00000015528	Pja2	0.464091	1.38483e-19	1.85048e-18
ENSRNOG00000049484	Atp9a	0.612861	1.41859e-19	1.89426e-18
ENSRNOG00000025198	Gas2l3	-0.991435	1.43572e-19	1.9158e-18
ENSRNOG00000050445	Gde1	-0.722019	1.43821e-19	1.91778e-18
ENSRNOG00000011774	Fblim1	-0.635968	1.45736e-19	1.94196e-18
ENSRNOG00000022116	Gjb6	-1.73352	1.45878e-19	1.9425e-18
ENSRNOG00000036690	Ppp1r27	1.49508	1.50763e-19	2.00615e-18
novel.825	-	0.947144	1.52727e-19	2.03086e-18
ENSRNOG00000004276	Itga3	-0.584678	1.52882e-19	2.03151e-18
ENSRNOG00000011306	Myod1	1.05338	1.53166e-19	2.03387e-18
novel.837	-	-0.84022	1.57358e-19	2.08809e-18
novel.828	-	-1.28049	1.64751e-19	2.18467e-18
ENSRNOG00000014278	Zfp710	-0.798365	1.80125e-19	2.38687e-18
ENSRNOG00000061474	Ctdp1	-0.593547	1.85123e-19	2.4514e-18
ENSRNOG00000011104	Rpl22	0.400988	1.98584e-19	2.62783e-18
ENSRNOG00000034180	Rpl37	0.682259	2.25083e-19	2.97642e-18
ENSRNOG00000015346	Obsl1	0.550889	2.28413e-19	3.01837e-18
ENSRNOG00000011820	Acpp	-0.738416	2.36781e-19	3.12679e-18
ENSRNOG00000009040	Gas2l1	-0.51334	2.5027e-19	3.30263e-18
ENSRNOG00000020525	Col5a3	-0.3144	2.61128e-19	3.44353e-18
ENSRNOG00000060098	Ptms	-0.258835	2.80478e-19	3.69615e-18
ENSRNOG00000008052	Atp13a2	-0.482956	2.81023e-19	3.70079e-18
ENSRNOG00000014562	Hnrnpf	-0.313383	2.81665e-19	3.70668e-18
ENSRNOG00000025350	Ppp1r13l	-0.568124	3.02815e-19	3.98227e-18
ENSRNOG00000058646	Zfp36l1	-0.331082	3.09631e-19	4.06911e-18
ENSRNOG00000004361	Parp10	0.676847	3.10753e-19	4.08104e-18
ENSRNOG00000034290	Ccl21	0.671783	3.29541e-19	4.3248e-18
ENSRNOG00000003954	Il2rg	-0.664075	3.33681e-19	4.37612e-18
ENSRNOG00000052129	Nwd1	-1.72999	3.34741e-19	4.38701e-18
ENSRNOG00000010922	Ppp2r1b	-0.599976	3.39473e-19	4.44598e-18
ENSRNOG00000030170	Krt10	-0.486396	3.48202e-19	4.55718e-18
novel.593	-	0.76663	3.50398e-19	4.58278e-18
ENSRNOG00000002358	Scpep1	-0.296082	3.56923e-19	4.66491e-18
ENSRNOG00000014844	Kif21a	-1.05241	3.71325e-19	4.84983e-18
ENSRNOG00000015105	Bspry	-1.29861	3.74767e-19	4.89144e-18
ENSRNOG00000049282	Oas2	1.26525	4.03933e-19	5.26851e-18
ENSRNOG00000051440	Ppp1r12b	0.473649	4.68149e-19	6.10191e-18
ENSRNOG00000004820	Sar1b	0.526011	4.94805e-19	6.44495e-18
ENSRNOG00000058132	SNORD29	1.58628	4.96224e-19	6.45902e-18
ENSRNOG00000036689	P4hb	-0.233605	5.17078e-19	6.72589e-18
ENSRNOG00000053232	Ror2	-0.56075	5.41875e-19	7.04364e-18
ENSRNOG00000019423	Dvl1	0.355058	5.75243e-19	7.47229e-18
ENSRNOG00000046649	-	-5.37116	5.89658e-19	7.65433e-18
ENSRNOG00000001767	RGD1562339	-0.898457	5.91703e-19	7.67566e-18
ENSRNOG00000002449	Maged2	0.626231	7.21931e-19	9.35863e-18
ENSRNOG00000046309	Gpr68	-1.28726	8.05166e-19	1.04306e-17
ENSRNOG00000032231	Mroh6	-1.54299	8.05895e-19	1.04329e-17
ENSRNOG00000028062	Arpc5	-0.339904	8.32096e-19	1.07648e-17
ENSRNOG00000050647	Hspa1b	-0.812738	8.40714e-19	1.0869e-17
ENSRNOG00000005796	Ctnna1	-0.302919	8.51262e-19	1.09979e-17
ENSRNOG00000008118	Sync	0.816656	9.21583e-19	1.18983e-17
ENSRNOG00000025757	Myh6	2.67574	1.02981e-18	1.32866e-17
ENSRNOG00000009343	Evpl	-0.699083	1.09213e-18	1.40812e-17
ENSRNOG00000010047	Ddit4l	1.01555	1.11947e-18	1.4424e-17
ENSRNOG00000010029	Ubald2	-0.384741	1.16548e-18	1.50067e-17
ENSRNOG00000008079	Ugp2	0.536248	1.17624e-18	1.51349e-17
ENSRNOG00000013492	Cap1	-0.285939	1.23711e-18	1.59075e-17
ENSRNOG00000024620	Mamdc2	-0.994368	1.25888e-18	1.61765e-17
ENSRNOG00000017421	Alpk2	1.83762	1.29662e-18	1.66503e-17
ENSRNOG00000020829	Them4	-1.20757	1.4172e-18	1.81865e-17
ENSRNOG00000019404	Hhatl	0.66811	1.42563e-18	1.82823e-17
ENSRNOG00000014338	Slc25a25	0.685864	1.45793e-18	1.86839e-17
novel.668	-	3.42237	1.46765e-18	1.8796e-17
ENSRNOG00000007067	Padi1	-3.54186	1.47115e-18	1.88281e-17
ENSRNOG00000009797	Aqp3	-0.640632	1.51719e-18	1.94044e-17
ENSRNOG00000019007	Rpl14	0.262845	1.54553e-18	1.97536e-17
ENSRNOG00000046889	Dbi	-0.473294	1.56465e-18	1.99846e-17
ENSRNOG00000004197	Asb12	1.48897	1.56961e-18	2.00345e-17
ENSRNOG00000048212	Krtap26-1	-6.6412	1.57948e-18	2.0147e-17
ENSRNOG00000013101	Pcdh8	-3.4829	1.60541e-18	2.04641e-17
ENSRNOG00000004226	Irak3	0.578407	1.60704e-18	2.04713e-17
ENSRNOG00000011154	Adgrf5	0.357447	1.72791e-18	2.19963e-17
ENSRNOG00000025520	Lbx1	0.936699	1.75339e-18	2.23058e-17
ENSRNOG00000014603	Sgcg	0.590238	1.80327e-18	2.29251e-17
ENSRNOG00000007400	Srebf2	-0.409128	1.84364e-18	2.34227e-17
ENSRNOG00000002903	Specc1	-0.748361	2.01364e-18	2.55655e-17
ENSRNOG00000020346	Best1	-1.45771	2.02979e-18	2.57533e-17
ENSRNOG00000058539	Ccnb1	-1.05421	2.13578e-18	2.70801e-17
ENSRNOG00000008600	Sytl1	-0.811451	2.19998e-18	2.78756e-17
ENSRNOG00000003221	Myoc	1.07981	2.33345e-18	2.95472e-17
ENSRNOG00000038955	MGC105567	1.37918	2.64014e-18	3.34085e-17
ENSRNOG00000012061	Prkcb	-1.27496	2.86447e-18	3.62232e-17
novel.34	-	-0.652337	2.98199e-18	3.76638e-17
ENSRNOG00000022490	LOC100361008	-2.37337	2.98233e-18	3.76638e-17
ENSRNOG00000032708	RT1-Bb	-0.365101	3.09154e-18	3.90171e-17
ENSRNOG00000050519	Rhoa	-0.286104	3.25462e-18	4.10482e-17
ENSRNOG00000003596	Itgb1bp2	1.00711	3.27501e-18	4.12781e-17
ENSRNOG00000030389	Lrrc30	3.29514	3.3715e-18	4.24662e-17
ENSRNOG00000013463	Kcnj8	0.858403	3.54301e-18	4.45971e-17
ENSRNOG00000013661	Kif26a	-0.652077	3.60094e-18	4.52964e-17
ENSRNOG00000061639	RT1-CE6	0.864235	3.6605e-18	4.60153e-17
ENSRNOG00000011951	Plk2	-0.453952	3.86402e-18	4.85417e-17
ENSRNOG00000003832	Vash2	0.790117	3.87977e-18	4.87075e-17
ENSRNOG00000020457	Tacc2	0.390893	4.35221e-18	5.46028e-17
ENSRNOG00000012764	Agap3	-0.337056	4.54788e-18	5.70202e-17
ENSRNOG00000014135	Rab11fip4	-1.67712	4.61324e-18	5.78017e-17
ENSRNOG00000012575	Fat2	-0.772368	4.61857e-18	5.78306e-17
ENSRNOG00000000568	Slc29a3	-0.534922	4.98477e-18	6.2375e-17
ENSRNOG00000037814	Cxcl17	3.15376	5.04078e-18	6.30345e-17
ENSRNOG00000027489	Mn1	0.988506	5.53035e-18	6.91113e-17
ENSRNOG00000030700	Mt-cox3	-0.256071	5.58576e-18	6.97581e-17
ENSRNOG00000059961	Rapgef3	0.587377	5.59539e-18	6.98327e-17
ENSRNOG00000060045	Pi4ka	-0.501422	5.91209e-18	7.3737e-17
ENSRNOG00000018939	Rexo2	-0.430094	6.00455e-18	7.48412e-17
ENSRNOG00000001653	St3gal6	1.24322	6.15601e-18	7.66791e-17
ENSRNOG00000015212	Hspa14	-0.736825	6.27449e-18	7.81039e-17
ENSRNOG00000008806	Clip4	1.26425	6.40046e-18	7.96201e-17
ENSRNOG00000062101	Ace	0.538149	6.47469e-18	8.04911e-17
ENSRNOG00000010428	Bahd1	-0.614678	6.72627e-18	8.35641e-17
ENSRNOG00000031475	Col16a1	-0.309634	6.92763e-18	8.60099e-17
ENSRNOG00000060538	Cdc42se1	-0.462531	7.19651e-18	8.92901e-17
ENSRNOG00000017428	Map1b	0.547505	7.23133e-18	8.96638e-17
ENSRNOG00000020706	Kcnn3	1.5382	7.26301e-18	8.99982e-17
ENSRNOG00000028594	Ifnar1	-0.432993	7.61828e-18	9.43392e-17
ENSRNOG00000051905	Wnt2	1.66434	7.69354e-18	9.52094e-17
ENSRNOG00000040064	Krtap16-5	-7.36597	7.77895e-18	9.6204e-17
ENSRNOG00000021840	Cped1	0.743435	7.92485e-18	9.79449e-17
ENSRNOG00000013380	Rhov	-1.21887	8.04937e-18	9.938e-17
ENSRNOG00000050251	MGC105649	-0.760022	8.05137e-18	9.938e-17
ENSRNOG00000060821	Rnf114	0.492818	9.49961e-18	1.1718e-16
ENSRNOG00000022838	Cnksr1	1.14769	9.85203e-18	1.21449e-16
ENSRNOG00000021750	Id1	0.519617	9.88542e-18	1.21782e-16
ENSRNOG00000001192	Gltp	-0.483021	1.00097e-17	1.23234e-16
ENSRNOG00000016387	Rpl34	0.296681	1.02892e-17	1.26592e-16
ENSRNOG00000019584	Dlk1	1.25065	1.08038e-17	1.32838e-16
ENSRNOG00000020164	Ifitm10	0.846887	1.15739e-17	1.42216e-16
ENSRNOG00000021207	Lgals12	2.02023	1.16773e-17	1.43394e-16
ENSRNOG00000055779	Tdrd7	0.61322	1.18615e-17	1.45563e-16
ENSRNOG00000004841	Akap6	1.03317	1.39186e-17	1.70697e-16
ENSRNOG00000024799	Cd93	-0.377704	1.41836e-17	1.73836e-16
ENSRNOG00000021881	Metap2	-0.461946	1.64101e-17	2.00995e-16
ENSRNOG00000017699	Mill1	1.21425	1.67283e-17	2.04761e-16
ENSRNOG00000010239	Cnbp	0.265029	1.77278e-17	2.16856e-16
ENSRNOG00000001149	Pxn	0.30856	1.87862e-17	2.29656e-16
ENSRNOG00000018986	Fbxl19	-0.475093	2.02822e-17	2.47786e-16
ENSRNOG00000008919	Arpp21	1.24854	2.09713e-17	2.5604e-16
ENSRNOG00000054286	Rrm2	-1.18963	2.13828e-17	2.60898e-16
ENSRNOG00000016875	Cbx7	0.745062	2.2026e-17	2.68573e-16
ENSRNOG00000018183	Ubr4	0.323962	2.37216e-17	2.89064e-16
ENSRNOG00000002807	2019-09-09	-0.413341	2.40125e-17	2.92423e-16
ENSRNOG00000009378	Rpl4	0.216417	2.55199e-17	3.10581e-16
ENSRNOG00000025998	Aim1	-0.760372	2.64987e-17	3.22289e-16
ENSRNOG00000000187	Csf2rb	-0.557874	2.69242e-17	3.27256e-16
ENSRNOG00000012630	Rhoc	-0.311221	2.71985e-17	3.30379e-16
ENSRNOG00000008180	Lyn	-0.458139	2.73804e-17	3.32377e-16
ENSRNOG00000012580	Ccdc141	1.18363	2.74828e-17	3.33408e-16
ENSRNOG00000013057	Prc1	-0.784179	2.78208e-17	3.37294e-16
ENSRNOG00000051006	Ufsp1	0.826674	2.81863e-17	3.41509e-16
ENSRNOG00000062248	Rn60_15_0937.6	-1.06474	2.89684e-17	3.50636e-16
ENSRNOG00000009354	Nrarp	-0.518158	2.89764e-17	3.50636e-16
ENSRNOG00000046772	Fam83c	-1.5773	3.13733e-17	3.794e-16
ENSRNOG00000051564	Rap2a	-0.721566	3.25229e-17	3.93054e-16
ENSRNOG00000021526	Slc25a34	1.71767	3.33412e-17	4.02688e-16
novel.39	-	-0.626683	3.54574e-17	4.27976e-16
ENSRNOG00000050500	Tob2	0.509343	3.55544e-17	4.28877e-16
ENSRNOG00000001352	Hectd4	-0.521197	3.59905e-17	4.33862e-16
ENSRNOG00000056837	Abr	-0.480762	3.62123e-17	4.36261e-16
ENSRNOG00000045636	Fasn	-0.287792	3.72006e-17	4.47885e-16
ENSRNOG00000010824	Parp8	0.783621	3.82927e-17	4.60743e-16
ENSRNOG00000015423	Ccna2	-0.916479	3.95285e-17	4.75313e-16
ENSRNOG00000030790	Ctnnd1	-0.320519	3.99018e-17	4.795e-16
ENSRNOG00000018198	Dapk1	-0.482501	4.22732e-17	5.07677e-16
ENSRNOG00000018369	Prx	0.689233	4.32232e-17	5.1876e-16
ENSRNOG00000049912	Atp5e	0.422325	4.33948e-17	5.20492e-16
ENSRNOG00000007443	Jag1	-0.428257	4.47187e-17	5.36035e-16
ENSRNOG00000005512	Ndufa4	0.420666	4.50313e-17	5.39443e-16
ENSRNOG00000012582	Eif4ebp1	0.465445	4.5876e-17	5.49217e-16
ENSRNOG00000018982	Entpd3	-2.37	4.82495e-17	5.77271e-16
ENSRNOG00000031515	Klra2	1.35744	4.96439e-17	5.93581e-16
ENSRNOG00000012835	Espl1	-0.907195	4.99696e-17	5.97102e-16
ENSRNOG00000045738	Ak4	-1.77023	5.35253e-17	6.39191e-16
ENSRNOG00000052510	Wnt10a	-0.843685	5.81046e-17	6.93442e-16
ENSRNOG00000017250	Gmpr	0.611279	5.86268e-17	6.99238e-16
ENSRNOG00000002461	Nid1	0.236211	5.92171e-17	7.05837e-16
ENSRNOG00000004205	Pkdcc	0.606312	6.09452e-17	7.25982e-16
ENSRNOG00000010362	Anxa2	-0.223604	6.45974e-17	7.69007e-16
ENSRNOG00000049269	RGD1563294	-0.8595	6.58702e-17	7.8367e-16
ENSRNOG00000001795	Itgb5	-0.400428	6.6121e-17	7.86165e-16
ENSRNOG00000017127	Rpl28	0.354679	6.66028e-17	7.91401e-16
ENSRNOG00000058461	Sfpq	-0.445918	6.707e-17	7.96456e-16
ENSRNOG00000020389	Capn12	-1.27907	6.93677e-17	8.23229e-16
ENSRNOG00000011521	Filip1	0.756908	7.10094e-17	8.4219e-16
ENSRNOG00000001065	Cyth3	0.52749	7.26454e-17	8.61057e-16
ENSRNOG00000027204	Map6	-0.695998	7.46761e-17	8.84578e-16
ENSRNOG00000003480	Aim2	1.78123	7.7662e-17	9.19378e-16
ENSRNOG00000021713	Kif18b	-1.12703	8.43214e-17	9.97594e-16
ENSRNOG00000008140	Rpl15	0.252467	8.53297e-17	1.0089e-15
ENSRNOG00000016234	Ciapin1	-0.691306	9.0197e-17	1.06579e-15
ENSRNOG00000003284	Epn3	-1.85463	9.04046e-17	1.06758e-15
ENSRNOG00000016917	Clcn1	1.06559	9.14413e-17	1.07915e-15
ENSRNOG00000061739	Klrk1	1.143	9.17296e-17	1.08189e-15
ENSRNOG00000052354	Arhgef40	0.388901	1.00988e-16	1.19035e-15
ENSRNOG00000042473	Krtap17-1	-3.03421	1.04098e-16	1.22626e-15
ENSRNOG00000012247	Rab7a	-0.309637	1.07719e-16	1.26812e-15
ENSRNOG00000019229	Fbl	-0.583725	1.08672e-16	1.27856e-15
ENSRNOG00000054257	Adam10	-0.524105	1.10279e-16	1.29666e-15
ENSRNOG00000021027	Dbp	0.346018	1.1578e-16	1.36051e-15
ENSRNOG00000005126	Pqlc3	-0.692918	1.16497e-16	1.36808e-15
ENSRNOG00000026260	Rpl11	0.272175	1.21565e-16	1.42672e-15
ENSRNOG00000002092	Hunk	-1.87487	1.25583e-16	1.47298e-15
ENSRNOG00000053450	Myadm	-0.284405	1.29027e-16	1.51245e-15
ENSRNOG00000060229	Arf1	-0.298952	1.4221e-16	1.66595e-15
ENSRNOG00000062013	Adprhl1	2.07362	1.57845e-16	1.84798e-15
ENSRNOG00000011150	Arsb	-0.505604	1.59217e-16	1.86289e-15
ENSRNOG00000008830	Nfe2l1	0.362423	1.60916e-16	1.88162e-15
ENSRNOG00000032902	LOC100912427	0.571261	1.62576e-16	1.89987e-15
ENSRNOG00000018761	Eif3c	-0.335627	1.63353e-16	1.90779e-15
ENSRNOG00000020993	Ms4a2	2.24872	1.67077e-16	1.95008e-15
ENSRNOG00000001062	Kmt5a	-0.488132	1.76009e-16	2.05309e-15
ENSRNOG00000016156	Nptxr	-0.770552	1.77397e-16	2.06801e-15
ENSRNOG00000057957	Aim1l	-0.779111	1.77988e-16	2.07364e-15
ENSRNOG00000056596	Alas1	-0.653139	1.82405e-16	2.12361e-15
ENSRNOG00000014378	Il1r2	1.17398	1.825e-16	2.12361e-15
ENSRNOG00000017628	Tagln	-0.24463	1.82973e-16	2.12782e-15
ENSRNOG00000031033	Mt-nd2	-0.253533	1.83743e-16	2.13546e-15
ENSRNOG00000045678	Krtap3-3	-4.06088	1.85019e-16	2.14899e-15
ENSRNOG00000004992	Rab1a	-0.344086	1.87276e-16	2.17388e-15
ENSRNOG00000004834	Llgl2	-0.758939	2.15965e-16	2.50538e-15
ENSRNOG00000003256	Ccng1	0.330126	2.186e-16	2.5344e-15
ENSRNOG00000000940	Flt1	-0.472172	2.29102e-16	2.65456e-15
ENSRNOG00000018524	Ezr	-0.367734	2.29701e-16	2.65988e-15
ENSRNOG00000020425	Stim1	0.454786	2.4914e-16	2.88323e-15
ENSRNOG00000012356	Slc36a1	-1.10961	2.5334e-16	2.93006e-15
ENSRNOG00000037030	Aadacl4	1.00651	2.58682e-16	2.99003e-15
ENSRNOG00000004873	Prkch	-0.605409	2.697e-16	3.1155e-15
ENSRNOG00000020710	Raver1	-0.442031	2.79312e-16	3.22459e-15
ENSRNOG00000020812	Gys1	0.524113	2.87168e-16	3.31328e-15
ENSRNOG00000028043	Cxcl3	-2.74095	3.02247e-16	3.48515e-15
novel.314	-	-0.716662	3.23992e-16	3.73363e-15
ENSRNOG00000026985	Phldb1	0.334861	3.24452e-16	3.73667e-15
ENSRNOG00000014610	Anpep	-0.273449	3.28635e-16	3.78257e-15
ENSRNOG00000019974	Uba52	0.256047	3.29345e-16	3.78846e-15
ENSRNOG00000012546	Frmpd1	1.38776	3.6282e-16	4.17101e-15
ENSRNOG00000011944	Snx10	-0.884073	3.65495e-16	4.19923e-15
ENSRNOG00000002135	Sgcb	0.486714	3.7537e-16	4.31009e-15
ENSRNOG00000008981	Pdcd6ip	-0.35901	3.83328e-16	4.39883e-15
ENSRNOG00000004275	Egfl6	-1.02374	4.28522e-16	4.91449e-15
ENSRNOG00000018533	Iffo1	0.425467	4.49598e-16	5.15311e-15
ENSRNOG00000031930	Bin2	-0.61018	4.52051e-16	5.17811e-15
ENSRNOG00000061058	Csde1	0.372495	4.63363e-16	5.30451e-15
ENSRNOG00000050430	Vav1	-0.81871	4.63893e-16	5.3074e-15
ENSRNOG00000023109	Icoslg	0.844087	4.67606e-16	5.34667e-15
ENSRNOG00000012156	Ostf1	-0.436004	4.75173e-16	5.42993e-15
ENSRNOG00000005299	Kif5a	-1.22098	4.90866e-16	5.60591e-15
ENSRNOG00000036794	Asb16	1.09786	5.09298e-16	5.81294e-15
ENSRNOG00000020242	Art5	1.39161	5.1748e-16	5.9028e-15
ENSRNOG00000014945	Kpna3	-0.56955	5.30325e-16	6.0457e-15
novel.794	-	-0.461874	5.78221e-16	6.58778e-15
ENSRNOG00000038957	RGD1305184	1.79307	5.79835e-16	6.60224e-15
ENSRNOG00000007947	Fam13a	0.95031	5.88237e-16	6.69391e-15
ENSRNOG00000029735	Pid1	-0.646416	5.94928e-16	6.76602e-15
ENSRNOG00000006663	Usp2	0.950058	6.12917e-16	6.96646e-15
ENSRNOG00000017710	AC139642.1	1.05687	6.16841e-16	7.00688e-15
ENSRNOG00000010174	Enpp4	0.708731	6.30917e-16	7.16252e-15
ENSRNOG00000023348	Tbc1d2	-0.831284	6.33374e-16	7.18614e-15
ENSRNOG00000032917	Zfand2a	-0.580321	6.41673e-16	7.27597e-15
ENSRNOG00000022565	Lrrc25	-0.632149	6.6138e-16	7.49302e-15
ENSRNOG00000011136	Osr2	0.919981	6.61599e-16	7.49302e-15
ENSRNOG00000053075	B4galnt4	-1.27198	6.75583e-16	7.64686e-15
ENSRNOG00000003388	Cenpf	-0.894523	6.82362e-16	7.71902e-15
ENSRNOG00000031167	Srxn1	-1.19626	6.90629e-16	7.80792e-15
ENSRNOG00000014061	Dusp5	-0.877764	7.26208e-16	8.20529e-15
ENSRNOG00000011631	Fst	1.10568	7.77838e-16	8.78345e-15
ENSRNOG00000002336	Gabra4	-2.38029	7.87005e-16	8.88171e-15
novel.672	-	0.71864	8.37553e-16	9.44659e-15
ENSRNOG00000034134	Cpm	-1.13468	8.46777e-16	9.54499e-15
ENSRNOG00000007894	Mpdz	0.558528	8.84667e-16	9.9662e-15
ENSRNOG00000054626	Rps8	0.244852	9.72108e-16	1.09448e-14
ENSRNOG00000004489	Adgre5	-0.406764	9.84039e-16	1.10726e-14
ENSRNOG00000046947	Ak5	-2.66652	1.03137e-15	1.15984e-14
ENSRNOG00000004367	Elk3	-0.379562	1.03703e-15	1.16551e-14
ENSRNOG00000018691	Ccnl2	0.289118	1.03981e-15	1.16795e-14
ENSRNOG00000049383	Krtap3-2	-4.10436	1.05471e-15	1.18399e-14
ENSRNOG00000039859	Dnmt1	-0.445099	1.12082e-15	1.25747e-14
ENSRNOG00000018960	Syne1	0.372305	1.14516e-15	1.28402e-14
ENSRNOG00000016779	Fam120a	-0.36642	1.17455e-15	1.3162e-14
ENSRNOG00000008673	Arpc3	-0.451154	1.21571e-15	1.36153e-14
ENSRNOG00000018815	Plk1	-0.864672	1.26165e-15	1.41215e-14
ENSRNOG00000020871	Ltbp4	-0.297766	1.27629e-15	1.4277e-14
ENSRNOG00000060728	Tuba1a	0.31423	1.27983e-15	1.43082e-14
ENSRNOG00000014886	Fam107b	-0.639475	1.37075e-15	1.53157e-14
ENSRNOG00000014966	LOC690000	0.52867	1.38165e-15	1.54285e-14
ENSRNOG00000001711	Hrasls	1.33576	1.41974e-15	1.58445e-14
ENSRNOG00000006435	Tor1b	0.57252	1.43701e-15	1.60279e-14
ENSRNOG00000017983	Ubac1	0.481495	1.43801e-15	1.60296e-14
ENSRNOG00000008819	Krt84	-2.49783	1.45727e-15	1.62348e-14
ENSRNOG00000020161	Zbtb7a	-0.454941	1.46383e-15	1.62984e-14
ENSRNOG00000016937	Mtfr1l	0.450141	1.48635e-15	1.65395e-14
ENSRNOG00000014624	Selenok	0.490419	1.52918e-15	1.70062e-14
ENSRNOG00000015131	Ube2c	-0.967038	1.58123e-15	1.75748e-14
ENSRNOG00000006789	Ddit3	0.789891	1.5913e-15	1.76765e-14
ENSRNOG00000007896	Klhl38	1.43913	1.59415e-15	1.76978e-14
ENSRNOG00000005616	Ncoa3	-0.668	1.65109e-15	1.83193e-14
ENSRNOG00000005492	Hpcal1	-0.469515	1.66311e-15	1.84419e-14
ENSRNOG00000025679	Stk40	0.472334	1.70339e-15	1.88776e-14
ENSRNOG00000011592	Lrp10	-0.306963	1.73224e-15	1.91863e-14
ENSRNOG00000016023	Kank1	0.359027	1.77724e-15	1.96732e-14
ENSRNOG00000007968	RGD1305350	-0.355709	1.86687e-15	2.06534e-14
ENSRNOG00000000490	Rps10	0.318896	1.94825e-15	2.15413e-14
ENSRNOG00000006375	Vdac1	0.346212	2.10028e-15	2.32088e-14
ENSRNOG00000008239	Repin1	-0.743339	2.2099e-15	2.4406e-14
ENSRNOG00000012544	Krtap3-1	-4.07674	2.2802e-15	2.51679e-14
ENSRNOG00000056135	Tsc22d3	0.382598	2.29656e-15	2.53338e-14
ENSRNOG00000030355	Mroh1	-0.467592	2.39138e-15	2.63646e-14
ENSRNOG00000003583	Smyd2	0.479756	2.42611e-15	2.6732e-14
ENSRNOG00000051450	Abracl	-0.427818	2.64048e-15	2.90773e-14
ENSRNOG00000018384	Adam12	-0.442412	2.70134e-15	2.97303e-14
ENSRNOG00000011798	Mapre1	-0.403332	2.70422e-15	2.97449e-14
ENSRNOG00000012149	Gpsm2	-0.617126	2.84631e-15	3.12898e-14
ENSRNOG00000002418	Tgfb2	0.590219	3.01723e-15	3.31496e-14
ENSRNOG00000013517	Phtf2	0.807631	3.29562e-15	3.61874e-14
ENSRNOG00000009076	Ttpal	-0.598347	3.34134e-15	3.66683e-14
ENSRNOG00000017342	Zdhhc7	-0.514104	3.38094e-15	3.70816e-14
ENSRNOG00000016448	Eef2k	0.341372	3.42076e-15	3.74968e-14
ENSRNOG00000003846	Pitpna	-0.353607	3.46704e-15	3.79823e-14
ENSRNOG00000007607	Nr4a1	-0.347322	3.47467e-15	3.8044e-14
ENSRNOG00000009629	Car2	-1.1892	3.55627e-15	3.89152e-14
ENSRNOG00000009276	Schip1	0.614601	3.68195e-15	4.02456e-14
novel.692	-	1.5011	3.68206e-15	4.02456e-14
ENSRNOG00000002210	Hsd17b11	-0.541649	3.84211e-15	4.19708e-14
ENSRNOG00000020205	Agrn	0.309344	3.87805e-15	4.23393e-14
ENSRNOG00000053362	Gabarapl1	-0.388221	4.07513e-15	4.44655e-14
ENSRNOG00000002941	Uhmk1	-0.789786	4.273e-15	4.65979e-14
ENSRNOG00000016031	Bicd2	-0.40504	4.46321e-15	4.86444e-14
ENSRNOG00000030644	Mt-nd1	-0.208488	4.60647e-15	5.01772e-14
ENSRNOG00000029145	AY172581.2	-0.990736	4.6299e-15	5.04036e-14
ENSRNOG00000007125	Vps54	0.516563	4.68616e-15	5.0987e-14
ENSRNOG00000014678	Fzd5	-1.11993	4.75261e-15	5.16806e-14
ENSRNOG00000012742	Irx2	-0.538446	4.9902e-15	5.42332e-14
ENSRNOG00000009068	Phlda3	0.314574	5.00074e-15	5.43169e-14
ENSRNOG00000016437	Tm4sf4	-2.75806	5.12947e-15	5.56835e-14
ENSRNOG00000056258	Dsc1	-2.09235	5.20726e-15	5.64958e-14
ENSRNOG00000013820	Tnfrsf14	1.12128	5.43639e-15	5.89483e-14
ENSRNOG00000017108	Syngr1	-0.838028	5.49331e-15	5.95317e-14
ENSRNOG00000056118	Cic	-0.347439	5.59074e-15	6.05531e-14
ENSRNOG00000009495	Src	-0.38917	5.82306e-15	6.30337e-14
ENSRNOG00000051056	Fndc4	-0.849721	5.86464e-15	6.34478e-14
ENSRNOG00000017123	B2m	0.241845	6.15484e-15	6.65497e-14
ENSRNOG00000002714	Mettl22	0.839126	6.18242e-15	6.68101e-14
ENSRNOG00000042137	Tmem173	-0.684068	6.32862e-15	6.83513e-14
ENSRNOG00000029682	Clic1	-0.303721	6.45865e-15	6.97162e-14
ENSRNOG00000012209	Cdadc1	0.746566	6.66464e-15	7.18991e-14
ENSRNOG00000028856	Pknox2	1.19146	6.67414e-15	7.19608e-14
ENSRNOG00000042497	LOC108352018	2.48578	6.71227e-15	7.23312e-14
ENSRNOG00000003973	Cyb5r1	0.455514	6.74136e-15	7.26037e-14
ENSRNOG00000062127	Rn60_1_2212.2	0.564502	6.81954e-15	7.34043e-14
ENSRNOG00000024594	Fhdc1	-0.75084	7.50464e-15	8.0733e-14
ENSRNOG00000010275	Slc17a9	-1.13997	7.51811e-15	8.08323e-14
ENSRNOG00000051307	Aoc3	0.373119	8.50614e-15	9.14039e-14
ENSRNOG00000050869	Cebpd	0.417205	8.549e-15	9.18128e-14
ENSRNOG00000005807	Ptpn7	-0.818044	9.34495e-15	1.00305e-13
ENSRNOG00000032728	LOC689230	-0.540571	9.42666e-15	1.01125e-13
ENSRNOG00000004500	Myc	-0.460563	9.44478e-15	1.01262e-13
ENSRNOG00000004111	Soat1	-0.453215	1.02244e-14	1.09559e-13
ENSRNOG00000003343	Canx	-0.304838	1.03261e-14	1.10588e-13
ENSRNOG00000031849	RGD1310110	1.42591	1.05311e-14	1.12719e-13
ENSRNOG00000007392	Atp6v1f	-0.456808	1.0566e-14	1.13029e-13
ENSRNOG00000019565	Tbx15	0.654976	1.16746e-14	1.24819e-13
ENSRNOG00000052424	RGD1306556	0.399361	1.20904e-14	1.29192e-13
ENSRNOG00000015278	Myl12a	0.25319	1.25722e-14	1.34265e-13
ENSRNOG00000026060	Arsi	1.22161	1.31918e-14	1.40803e-13
ENSRNOG00000017914	Prkcdbp	0.350398	1.32907e-14	1.4178e-13
ENSRNOG00000005347	Fjx1	-0.595604	1.35703e-14	1.44682e-13
ENSRNOG00000053283	LOC100365588	-5.11895	1.4064e-14	1.49855e-13
ENSRNOG00000011145	Crhr2	0.786428	1.40712e-14	1.49855e-13
ENSRNOG00000051235	C2	0.489772	1.41827e-14	1.50958e-13
ENSRNOG00000033787	Adamtsl5	-0.635457	1.43197e-14	1.52331e-13
novel.530	-	0.42996	1.46915e-14	1.562e-13
ENSRNOG00000016589	Mlf2	-0.301921	1.4833e-14	1.57616e-13
ENSRNOG00000003402	Stx6	-0.424033	1.48476e-14	1.57683e-13
ENSRNOG00000059362	Has3	-1.00017	1.48601e-14	1.57729e-13
ENSRNOG00000008016	Ckap4	-0.31628	1.49796e-14	1.58909e-13
ENSRNOG00000045797	Lep	-1.89774	1.55277e-14	1.64632e-13
ENSRNOG00000014237	Zfp503	-0.430172	1.6151e-14	1.71145e-13
ENSRNOG00000020485	Vav3	-0.618034	1.62036e-14	1.71546e-13
ENSRNOG00000001851	Far2	1.34601	1.62068e-14	1.71546e-13
ENSRNOG00000013948	Zc3hav1	0.430122	1.64227e-14	1.73734e-13
ENSRNOG00000003773	Hmox2	0.506864	1.68332e-14	1.77979e-13
ENSRNOG00000022143	Dusp23	1.17518	1.70241e-14	1.79897e-13
ENSRNOG00000001189	Sik1	-0.358454	1.7233e-14	1.82005e-13
novel.284	-	-0.828178	1.82243e-14	1.92367e-13
ENSRNOG00000023919	Gbas	0.469466	1.82432e-14	1.92461e-13
ENSRNOG00000027380	Upk1b	-1.91887	1.83158e-14	1.9312e-13
ENSRNOG00000011316	Fam167a	-0.527729	1.84974e-14	1.94928e-13
ENSRNOG00000009342	Fcnb	1.20112	1.88824e-14	1.98874e-13
ENSRNOG00000056658	Xylt1	-0.970354	1.94185e-14	2.04408e-13
ENSRNOG00000021041	Fam171a2	0.419734	1.95165e-14	2.0524e-13
ENSRNOG00000000611	Ube2d1	0.594353	1.9519e-14	2.0524e-13
ENSRNOG00000008857	Adamts10	0.360531	2.02919e-14	2.13249e-13
ENSRNOG00000013178	Cmip	-0.428372	2.03039e-14	2.13258e-13
ENSRNOG00000018346	Agtr1a	0.906418	2.03906e-14	2.14051e-13
ENSRNOG00000004741	Rpl19	0.25795	2.11041e-14	2.21419e-13
ENSRNOG00000006019	G0s2	1.09038	2.19098e-14	2.29747e-13
ENSRNOG00000033261	Fam107a	0.749458	2.23936e-14	2.3469e-13
ENSRNOG00000012297	2019-03-08	-0.438859	2.24941e-14	2.35614e-13
ENSRNOG00000004846	Atp6v1c1	-0.472198	2.38879e-14	2.50077e-13
ENSRNOG00000050646	Fem1a	0.4249	2.39882e-14	2.50988e-13
ENSRNOG00000018553	Pitpnm1	0.383356	2.51072e-14	2.62553e-13
ENSRNOG00000027954	Cdh15	0.97843	2.61085e-14	2.72875e-13
ENSRNOG00000021100	Tnfaip8l2	-0.521601	2.62557e-14	2.74263e-13
ENSRNOG00000018408	RGD1307554	0.491663	2.64711e-14	2.76362e-13
ENSRNOG00000016419	Pdlim5	0.532661	2.72835e-14	2.84688e-13
ENSRNOG00000022637	AABR07052585.1	1.64015	2.74355e-14	2.86117e-13
ENSRNOG00000016727	Akr1a1	-0.22888	2.85556e-14	2.97636e-13
ENSRNOG00000007345	Amot	0.71109	2.95863e-14	3.0821e-13
ENSRNOG00000008843	Eci1	0.575113	3.02873e-14	3.15342e-13
ENSRNOG00000013737	Bcar3	-0.615381	3.10657e-14	3.23269e-13
ENSRNOG00000021255	Smox	-0.561196	3.1129e-14	3.23751e-13
ENSRNOG00000021264	Pcna	-0.429015	3.27844e-14	3.40783e-13
ENSRNOG00000039891	Adgrg5	1.00363	3.43757e-14	3.57129e-13
ENSRNOG00000012817	Lrrc17	0.375804	3.51855e-14	3.65344e-13
ENSRNOG00000002451	Fndc3c1	2.83488	3.58859e-14	3.72414e-13
ENSRNOG00000009722	Chd3	-0.284867	3.68766e-14	3.82487e-13
ENSRNOG00000020580	LOC500956	0.728198	3.776e-14	3.91437e-13
ENSRNOG00000019356	Lrfn4	-0.511589	3.78326e-14	3.91977e-13
ENSRNOG00000007430	Slx4ip	-1.06589	3.81353e-14	3.94898e-13
ENSRNOG00000012280	Ptx3	-0.90371	4.01881e-14	4.1593e-13
ENSRNOG00000032381	Naglu	-0.519546	4.17666e-14	4.32034e-13
ENSRNOG00000002225	Scarb2	-0.40766	4.21675e-14	4.35944e-13
ENSRNOG00000060237	Inhbb	-0.573041	4.25443e-14	4.39602e-13
ENSRNOG00000037339	Siglec10	-1.13701	4.35739e-14	4.49996e-13
ENSRNOG00000045992	Tlr8	-0.871731	4.46576e-14	4.60938e-13
ENSRNOG00000018859	Pik3ip1	0.547509	4.71104e-14	4.85993e-13
ENSRNOG00000005975	LOC100362027	0.768768	4.7818e-14	4.93027e-13
ENSRNOG00000013994	Enpp1	0.606417	4.96802e-14	5.1195e-13
ENSRNOG00000001252	Chst12	-0.478228	5.01372e-14	5.16381e-13
ENSRNOG00000017084	Hsd11b2	1.31765	5.04543e-14	5.19366e-13
ENSRNOG00000055860	Arl8b	-0.406243	5.20345e-14	5.35344e-13
ENSRNOG00000010800	Hadhb	0.420292	5.24671e-14	5.39505e-13
ENSRNOG00000049270	Ppp2r3b	-0.47734	5.38927e-14	5.53865e-13
ENSRNOG00000015953	Oaz2	0.423124	5.39816e-14	5.5448e-13
novel.774	-	1.28281	5.42177e-14	5.56606e-13
ENSRNOG00000049402	Nbl1	0.290945	5.45538e-14	5.59756e-13
ENSRNOG00000028569	Arhgap27	-0.460684	5.56689e-14	5.7089e-13
ENSRNOG00000009790	Kcnk3	0.882031	5.61024e-14	5.75027e-13
ENSRNOG00000006740	Gatsl3	0.514141	5.89444e-14	6.03832e-13
ENSRNOG00000026474	Cad	-0.387353	5.90175e-14	6.04257e-13
ENSRNOG00000011175	Hnrnpa2b1	-0.323748	5.95379e-14	6.09258e-13
ENSRNOG00000000787	RT1-T24-2	1.41064	6.01289e-14	6.14976e-13
ENSRNOG00000005861	Hsd11b1	-0.778568	6.04735e-14	6.18169e-13
ENSRNOG00000003439	Il15	1.02411	6.12488e-14	6.25761e-13
ENSRNOG00000045752	Rrm1	-0.50545	6.49646e-14	6.63369e-13
ENSRNOG00000002864	Nacc1	-0.384918	6.62491e-14	6.75996e-13
ENSRNOG00000039336	Hrct1	0.769508	6.62721e-14	6.75996e-13
ENSRNOG00000013514	Maf1	0.346013	6.74789e-14	6.87939e-13
ENSRNOG00000017409	Wnt6	-1.16086	6.83062e-14	6.96002e-13
ENSRNOG00000039698	Prss22	-1.38067	6.9627e-14	7.09081e-13
ENSRNOG00000017905	Map1lc3b	0.362286	7.14869e-14	7.27634e-13
ENSRNOG00000024349	Cbarp	-0.691406	7.1945e-14	7.31908e-13
ENSRNOG00000019382	Zbtb47	0.482568	7.2217e-14	7.34283e-13
ENSRNOG00000042274	Fbxo31	0.396942	7.32992e-14	7.4489e-13
ENSRNOG00000027357	Sox17	0.435318	7.34715e-14	7.46244e-13
ENSRNOG00000047374	Gnas	0.281191	7.47931e-14	7.59263e-13
ENSRNOG00000050106	Rcc1	-0.644913	7.60428e-14	7.71539e-13
ENSRNOG00000018582	Exosc6	-0.765851	8.22368e-14	8.33941e-13
ENSRNOG00000009271	Smarca4	-0.306103	8.32091e-14	8.43353e-13
ENSRNOG00000010992	Hspb3	1.40332	8.32642e-14	8.43464e-13
ENSRNOG00000000991	Arpc1b	-0.230657	8.4752e-14	8.5808e-13
ENSRNOG00000052204	Tbc1d24	-0.862723	8.78852e-14	8.89331e-13
ENSRNOG00000020383	Dapk3	-0.379198	9.02157e-14	9.1243e-13
ENSRNOG00000011423	Pitx1	1.4498	9.61126e-14	9.71556e-13
ENSRNOG00000015434	Midn	-0.330943	9.79524e-14	9.89631e-13
ENSRNOG00000004874	Flrt3	-0.835763	9.83113e-14	9.92731e-13
ENSRNOG00000022800	Sp140	0.603565	1.0357e-13	1.04528e-12
ENSRNOG00000008754	Flvcr2	-1.11222	1.04936e-13	1.05851e-12
ENSRNOG00000058337	Plcb2	-1.07333	1.07933e-13	1.08817e-12
ENSRNOG00000001738	Eif4g1	-0.311347	1.11931e-13	1.12788e-12
ENSRNOG00000020731	Ppfia3	-1.12211	1.1278e-13	1.13583e-12
ENSRNOG00000019529	Btbd1	0.353059	1.19225e-13	1.20011e-12
ENSRNOG00000023079	Nras	-0.536733	1.21341e-13	1.22077e-12
ENSRNOG00000018712	Camk2a	1.01228	1.27464e-13	1.28168e-12
ENSRNOG00000012055	Man2a2	0.469122	1.30261e-13	1.30913e-12
ENSRNOG00000024533	Eogt	-0.560182	1.31598e-13	1.32186e-12
ENSRNOG00000000478	AA926063	1.92403	1.37973e-13	1.38517e-12
ENSRNOG00000016638	Gnb1	-0.278291	1.38358e-13	1.38831e-12
ENSRNOG00000000443	C4a	1.1121	1.40195e-13	1.406e-12
ENSRNOG00000001584	Map3k7cl	0.76101	1.40914e-13	1.41247e-12
ENSRNOG00000057706	Kdm5c	-0.446612	1.441e-13	1.44365e-12
ENSRNOG00000013620	Cdk13	-0.415396	1.44685e-13	1.44874e-12
ENSRNOG00000054033	Adap1	-0.886016	1.47313e-13	1.47428e-12
ENSRNOG00000010629	Nod1	0.41762	1.50645e-13	1.50685e-12
ENSRNOG00000013798	Fnbp1l	-0.643051	1.57401e-13	1.5736e-12
ENSRNOG00000019403	Afap1l1	0.587228	1.58276e-13	1.58152e-12
ENSRNOG00000013306	Pcdh20	1.94883	1.58481e-13	1.58273e-12
ENSRNOG00000004172	Pdk2	0.700142	1.59543e-13	1.59252e-12
ENSRNOG00000016220	Rpl12	0.283192	1.62887e-13	1.62504e-12
ENSRNOG00000011141	Serpina11	-1.37781	1.63456e-13	1.62987e-12
ENSRNOG00000006646	Vopp1	-0.55752	1.642e-13	1.63643e-12
ENSRNOG00000046121	Igsf7	-2.03218	1.7341e-13	1.72732e-12
ENSRNOG00000002460	Serpinb2	0.96144	1.76094e-13	1.75313e-12
ENSRNOG00000038881	Hcls1	-0.481769	1.78493e-13	1.7761e-12
ENSRNOG00000014007	Gfod1	-0.658317	1.8896e-13	1.87927e-12
ENSRNOG00000007649	Dnm2	-0.347589	1.93327e-13	1.9217e-12
ENSRNOG00000054515	Fgd6	-0.919832	1.93815e-13	1.92554e-12
ENSRNOG00000007419	Pank3	-0.460196	2.00032e-13	1.98627e-12
ENSRNOG00000028708	Ntsr1	2.77871	2.04903e-13	2.03359e-12
ENSRNOG00000012228	Skap2	-0.535215	2.05151e-13	2.035e-12
ENSRNOG00000015582	Me2	-0.648784	2.07259e-13	2.05484e-12
ENSRNOG00000009712	Gale	-0.608715	2.13313e-13	2.11376e-12
ENSRNOG00000020281	Kif22	-0.717225	2.24172e-13	2.22021e-12
ENSRNOG00000060141	Epdr1	0.838088	2.36019e-13	2.33633e-12
ENSRNOG00000031211	Acsm5	4.10558	2.36541e-13	2.34029e-12
ENSRNOG00000051531	Ctu2	-0.6118	2.45498e-13	2.42764e-12
ENSRNOG00000024115	C6	0.742775	2.46944e-13	2.44069e-12
ENSRNOG00000042411	Rps6ka1	-0.515336	2.53322e-13	2.50242e-12
ENSRNOG00000011076	Ank2	0.83045	2.54467e-13	2.51243e-12
ENSRNOG00000014915	Gsr	-0.501755	2.55034e-13	2.51673e-12
ENSRNOG00000009439	Eef1a1	0.158208	2.58182e-13	2.54648e-12
ENSRNOG00000013631	Slc31a2	-0.626059	2.60662e-13	2.56962e-12
ENSRNOG00000009663	Apex1	-0.497817	2.65307e-13	2.61406e-12
ENSRNOG00000007906	Bub1b	-1.0205	2.6729e-13	2.63223e-12
ENSRNOG00000000047	Cd82	-0.318905	2.7212e-13	2.67842e-12
ENSRNOG00000019062	Pura	-0.61021	2.80425e-13	2.75874e-12
ENSRNOG00000004526	Cox7a2l	0.345854	2.81783e-13	2.77068e-12
ENSRNOG00000009421	Ivd	0.280873	2.84728e-13	2.79819e-12
ENSRNOG00000012255	Ktn1	0.430502	2.87694e-13	2.82588e-12
ENSRNOG00000018326	Pgls	-0.41893	2.99233e-13	2.93772e-12
ENSRNOG00000016353	Nim1k	-1.95679	3.03807e-13	2.98109e-12
ENSRNOG00000004589	Galnt16	0.373729	3.07918e-13	3.01988e-12
ENSRNOG00000015971	Slc12a2	0.401616	3.20727e-13	3.14388e-12
ENSRNOG00000021063	Grin2d	-0.585197	3.25024e-13	3.18437e-12
ENSRNOG00000025624	Arhgap20	1.11607	3.25909e-13	3.1914e-12
ENSRNOG00000060847	Krtap2-4	-4.64091	3.34062e-13	3.26956e-12
ENSRNOG00000004889	Vangl2	-0.863558	3.37557e-13	3.30208e-12
ENSRNOG00000000204	Syncrip	-0.467238	3.43781e-13	3.36124e-12
ENSRNOG00000052579	Sox21	-1.52644	3.49434e-13	3.41476e-12
ENSRNOG00000018413	Per3	0.495453	3.55092e-13	3.46827e-12
ENSRNOG00000021137	Kctd15	-0.443201	3.6379e-13	3.55141e-12
ENSRNOG00000006818	Arl6ip5	0.335929	3.71123e-13	3.62116e-12
ENSRNOG00000016987	Pstpip2	1.15241	3.71319e-13	3.62122e-12
ENSRNOG00000030183	Plod2	0.599524	3.73051e-13	3.63625e-12
ENSRNOG00000018964	Gss	-0.579475	3.73766e-13	3.64136e-12
ENSRNOG00000020235	Hnrnpl	-0.228754	3.81236e-13	3.71224e-12
ENSRNOG00000003494	Ppfia4	0.757122	3.81474e-13	3.71266e-12
ENSRNOG00000048302	LOC100910979	1.68621	3.84369e-13	3.73893e-12
ENSRNOG00000004487	Nek2	-1.40331	3.93693e-13	3.82597e-12
ENSRNOG00000000894	Fry	0.484747	3.93718e-13	3.82597e-12
ENSRNOG00000028713	Acvrl1	0.35772	3.94997e-13	3.83645e-12
ENSRNOG00000029662	Wdfy4	-0.625844	4.00168e-13	3.8847e-12
ENSRNOG00000047741	E2f2	-0.785253	4.13511e-13	4.0122e-12
ENSRNOG00000037647	Ostm1	-0.687597	4.16813e-13	4.04218e-12
ENSRNOG00000025736	Tcf23	-2.00938	4.38973e-13	4.25491e-12
ENSRNOG00000010361	Kif3b	-0.629902	4.48272e-13	4.34285e-12
ENSRNOG00000012508	Slc39a8	-0.666115	4.60437e-13	4.45844e-12
ENSRNOG00000046313	Basp1	-0.456225	4.65173e-13	4.50202e-12
ENSRNOG00000019453	Rps5	0.293756	4.70734e-13	4.55352e-12
ENSRNOG00000011413	Podn	0.279798	4.81449e-13	4.65482e-12
ENSRNOG00000046349	AABR07067829.1	0.556211	4.81866e-13	4.65649e-12
ENSRNOG00000007486	Atg7	-0.723514	4.8558e-13	4.69001e-12
ENSRNOG00000004101	2019-03-01	1.10082	5.1923e-13	5.01249e-12
ENSRNOG00000050108	LOC100911319	-0.481194	5.28284e-13	5.09731e-12
ENSRNOG00000019129	Fcgbp	0.911301	5.3002e-13	5.11148e-12
ENSRNOG00000004677	Zeb2	-0.493198	5.34089e-13	5.14812e-12
ENSRNOG00000025936	Rpl6	0.189187	5.69418e-13	5.48589e-12
ENSRNOG00000019507	Hnrnpul2	-0.353898	5.75318e-13	5.53994e-12
ENSRNOG00000023851	Igsf3	-0.387705	5.78767e-13	5.57034e-12
ENSRNOG00000019176	Kcne5	3.32219	5.82436e-13	5.60282e-12
ENSRNOG00000038480	Ppp1r36	-0.861961	5.85197e-13	5.62655e-12
ENSRNOG00000033444	F10	1.2996	6.1265e-13	5.88754e-12
ENSRNOG00000010067	Lypla2	-0.442543	6.14268e-13	5.90012e-12
ENSRNOG00000005043	Cpeb2	-0.778594	6.1523e-13	5.90639e-12
ENSRNOG00000001227	Adarb1	0.488685	6.18837e-13	5.93803e-12
ENSRNOG00000018823	Nisch	0.225819	6.28102e-13	6.02391e-12
ENSRNOG00000013281	Mib1	-0.482993	6.37884e-13	6.11466e-12
ENSRNOG00000052064	Parvg	-1.08952	6.48381e-13	6.21216e-12
ENSRNOG00000036829	Nckap1l	-0.544179	6.80024e-13	6.51206e-12
ENSRNOG00000012756	Slc25a43	-1.35678	7.10408e-13	6.79962e-12
ENSRNOG00000002881	Ddr2	0.622234	7.36704e-13	7.04777e-12
ENSRNOG00000037838	RGD1560455	-1.2427	7.40362e-13	7.07922e-12
ENSRNOG00000013538	Capza1	-0.371133	7.47998e-13	7.14866e-12
[truncated: 6,471 more rows]

## Sheet: STZ+HB VS STZ
STZ+HB vs STZ
gene_id	gene_name	log2FoldChange	pvalue	FDR
ENSRNOG00000003897	Col1a1	-1.14068	0	0
ENSRNOG00000003357	Col3a1	-1.00761	0	0
ENSRNOG00000049695	Myh2	1.11332	0	0
ENSRNOG00000016837	Ckm	1.35081	0	0
ENSRNOG00000052802	Aldoa	1.21021	0	0
ENSRNOG00000019745	Actn3	1.53778	0	0
ENSRNOG00000021090	Pygm	1.28617	0	0
novel.99	-	1.19141	0	0
ENSRNOG00000008749	Col5a1	-1.27039	0	0
ENSRNOG00000058470	Col12a1	-1.76659	0	0
ENSRNOG00000004078	Eno3	1.0637	0	0
ENSRNOG00000019627	Mybpc2	1.43792	0	0
ENSRNOG00000003736	Col5a2	-1.14535	0	0
ENSRNOG00000040122	Myoz1	1.13781	0	0
ENSRNOG00000002548	Tnn	-2.36784	0	0
ENSRNOG00000003171	Mpz	1.84173	0	0
ENSRNOG00000046276	Myh3	-1.52928	0	0
ENSRNOG00000001959	Mx1	-1.6009	0	0
ENSRNOG00000008210	Ky	1.63279	0	0
ENSRNOG00000022256	Cxcl10	-2.27345	0	0
ENSRNOG00000009565	Pdk4	1.74251	0	0
ENSRNOG00000007539	Rsad2	-1.98534	0	0
ENSRNOG00000010529	Thbs2	-1.3007	1.26991e-307	9.60275e-305
ENSRNOG00000036604	Ifit2	-1.65107	6.88415e-305	4.98872e-302
ENSRNOG00000012660	Postn	-1.02129	1.33405e-297	9.28071e-295
ENSRNOG00000019648	Col6a3	-0.958034	1.45468e-292	9.73071e-290
ENSRNOG00000013532	Pgam2	1.35141	1.63116e-287	1.05071e-284
ENSRNOG00000009465	Sfrp2	-1.46406	1.79771e-281	1.11663e-278
ENSRNOG00000009421	Ivd	1.22129	5.49094e-279	3.29305e-276
ENSRNOG00000019050	Ifit1	-1.97072	1.51583e-278	8.78778e-276
ENSRNOG00000047124	Atp2a1	1.10579	4.74788e-278	2.66372e-275
ENSRNOG00000002052	Ccdc80	-1.02137	1.13629e-276	6.17573e-274
ENSRNOG00000006471	Pvalb	1.24741	4.3336e-270	2.28394e-267
ENSRNOG00000031743	Gbp2	-1.48161	2.61703e-266	1.33869e-263
ENSRNOG00000006723	Itga11	-2.03225	3.34728e-264	1.66331e-261
ENSRNOG00000021200	Hfe2	1.20353	1.01727e-260	4.91455e-258
ENSRNOG00000008536	Actc1	-1.55545	1.90894e-255	8.97303e-253
ENSRNOG00000056457	Gpd1	1.26991	6.30704e-239	2.88663e-236
ENSRNOG00000012840	Sparc	-0.862757	1.43494e-238	6.39909e-236
ENSRNOG00000008816	Gpnmb	0.888925	5.40608e-235	2.35057e-232
ENSRNOG00000046763	Adssl1	1.16854	2.35565e-231	9.99254e-229
ENSRNOG00000057092	Slfn4	-0.97935	1.3079e-228	5.41595e-226
ENSRNOG00000004610	Lum	-1.00796	6.74107e-228	2.72653e-225
ENSRNOG00000017414	Irf7	-1.13459	8.62108e-220	3.40768e-217
ENSRNOG00000015155	Tnnc2	0.908049	1.43508e-216	5.54643e-214
ENSRNOG00000017786	Acta1	0.989093	1.28433e-208	4.85589e-206
ENSRNOG00000018570	C1qtnf3	-1.49343	2.06905e-207	7.65637e-205
ENSRNOG00000058645	Tnc	-0.940484	7.1783e-204	2.60094e-201
ENSRNOG00000009073	Tnni1	-1.27805	4.47978e-202	1.59005e-199
ENSRNOG00000001963	Mx2	-1.33592	1.10857e-194	3.85605e-192
ENSRNOG00000016731	Tpm2	0.781259	2.8821e-190	9.82851e-188
ENSRNOG00000058068	Obscn	1.05083	3.25477e-190	1.0886e-187
ENSRNOG00000008235	Mylk2	1.11974	6.70419e-189	2.19999e-186
ENSRNOG00000022839	Ifit3	-1.50277	1.01023e-186	3.2537e-184
ENSRNOG00000020276	Tnni2	0.871845	2.56844e-186	8.12189e-184
ENSRNOG00000057988	Pfkm	0.788636	1.9517e-183	6.06142e-181
ENSRNOG00000016831	Serpinh1	-0.872085	7.53623e-183	2.29948e-180
ENSRNOG00000002746	Fstl1	-1.04036	7.14622e-182	2.14288e-179
ENSRNOG00000021802	Isg15	-1.59233	7.68937e-179	2.26667e-176
ENSRNOG00000030210	Fndc1	-1.01858	1.15776e-178	3.35595e-176
ENSRNOG00000031475	Col16a1	-1.1628	9.06396e-178	2.58427e-175
ENSRNOG00000016516	Mbp	1.45624	2.20349e-177	6.18114e-175
ENSRNOG00000025184	Prss35	-1.76569	1.59956e-170	4.41581e-168
ENSRNOG00000045636	Fasn	1.02917	1.05844e-169	2.87632e-167
ENSRNOG00000007302	Fbn1	-0.862226	8.92878e-169	2.38907e-166
ENSRNOG00000005569	Phospho1	1.21979	1.13052e-166	2.97909e-164
ENSRNOG00000002461	Nid1	-0.877159	1.89472e-164	4.91835e-162
ENSRNOG00000017645	Mylpf	0.821461	5.79375e-164	1.48184e-161
ENSRNOG00000030187	Mmp12	1.15017	2.58862e-163	6.52483e-161
ENSRNOG00000026679	Scn4b	1.44888	5.79197e-163	1.43906e-160
ENSRNOG00000007690	Cmpk2	-1.66757	6.10388e-162	1.49519e-159
ENSRNOG00000018630	Gapdh	0.720107	1.66208e-161	4.01484e-159
ENSRNOG00000018865	Adamts12	-1.42365	2.05939e-160	4.90642e-158
ENSRNOG00000003217	Lgals3bp	-0.998427	2.63426e-159	6.19121e-157
ENSRNOG00000020557	Ryr1	0.84492	9.33418e-158	2.16453e-155
ENSRNOG00000021102	Scn1b	1.09792	3.22458e-157	7.37919e-155
ENSRNOG00000009889	Pgm1	0.870539	5.51299e-156	1.24522e-153
ENSRNOG00000013720	Aebp1	-0.828475	1.08501e-148	2.41929e-146
ENSRNOG00000029658	Rnf213	-1.01927	1.93393e-147	4.25759e-145
ENSRNOG00000006604	Thy1	-0.979723	1.28554e-146	2.79476e-144
ENSRNOG00000009773	Elovl4	1.05662	1.98548e-145	4.26315e-143
ENSRNOG00000049560	Glul	0.686911	2.23549e-144	4.74142e-142
ENSRNOG00000018943	Tnnc1	-1.65462	2.68068e-141	5.61715e-139
ENSRNOG00000016695	Mmp2	-0.727021	1.09579e-139	2.26881e-137
ENSRNOG00000016983	Myh7	-1.49946	3.98317e-137	8.15003e-135
ENSRNOG00000003172	Serpinf1	-0.951601	5.03052e-136	1.01734e-133
ENSRNOG00000031529	Cyp2b12	1.34053	7.73404e-135	1.5461e-132
ENSRNOG00000003338	Pmp22	0.940902	6.03994e-134	1.19371e-131
ENSRNOG00000015655	Ptgfrn	-0.868256	1.18883e-132	2.32316e-130
ENSRNOG00000006548	Mrc2	-0.994566	3.7876e-132	7.31934e-130
ENSRNOG00000025001	Pcolce	-0.886651	1.27344e-131	2.43382e-129
ENSRNOG00000015850	Rbp7	0.957513	5.31296e-130	1.00438e-127
ENSRNOG00000003597	Tuba4a	1.32136	7.27356e-130	1.36023e-127
novel.111	-	-0.980327	2.42116e-128	4.47967e-126
ENSRNOG00000014426	Lox	-1.07682	1.80104e-127	3.29723e-125
ENSRNOG00000014030	Synm	0.895543	3.82939e-127	6.93757e-125
ENSRNOG00000026605	Ifi27l2b	-1.03395	4.39569e-127	7.88142e-125
ENSRNOG00000015941	Fkbp10	-0.986265	1.92584e-125	3.41778e-123
ENSRNOG00000023969	Herc6	-1.40934	3.72864e-125	6.55035e-123
ENSRNOG00000042499	LOC100364435	-0.746929	4.12531e-125	7.17474e-123
ENSRNOG00000028041	Tnnt1	-1.86683	5.43704e-125	9.36248e-123
ENSRNOG00000018369	Prx	1.39337	4.34257e-124	7.4045e-122
ENSRNOG00000007290	Atp1a2	0.826528	1.06724e-123	1.80208e-121
ENSRNOG00000013917	Igsf10	-1.22109	3.12271e-123	5.22213e-121
ENSRNOG00000052219	Gm2a	0.663433	1.14635e-122	1.8988e-120
ENSRNOG00000020263	Atp1a3	1.30181	1.31505e-122	2.15767e-120
ENSRNOG00000028814	Oasl2	-1.18522	1.63191e-122	2.65254e-120
ENSRNOG00000010890	Bmp1	-0.867105	1.86019e-122	2.9956e-120
ENSRNOG00000017637	Fbp2	2.17864	1.44459e-120	2.30498e-118
ENSRNOG00000032857	Klk1	-1.69815	7.81224e-120	1.23519e-117
ENSRNOG00000023150	Gpi	0.706458	1.01632e-119	1.59242e-117
ENSRNOG00000022218	Ifi44	-1.22021	1.13464e-119	1.76194e-117
ENSRNOG00000043451	Spp1	0.852315	2.62874e-118	4.04593e-116
ENSRNOG00000004554	Dcn	-0.771125	1.53926e-117	2.34831e-115
ENSRNOG00000011329	Pkm	0.673566	5.42599e-117	8.20599e-115
ENSRNOG00000043007	Rcn3	-0.819689	7.5159e-117	1.12687e-114
ENSRNOG00000020579	Col7a1	-1.01891	1.00208e-116	1.48959e-114
ENSRNOG00000012216	Tgfbi	-0.776834	7.84544e-116	1.15634e-113
ENSRNOG00000013262	Myl1	0.57845	2.84021e-114	4.151e-112
ENSRNOG00000005478	Fkbp9	-0.848938	4.7799e-113	6.92767e-111
novel.713	-	0.733575	1.61019e-112	2.31441e-110
ENSRNOG00000032240	Gbp5	-1.51837	8.00724e-112	1.14149e-109
ENSRNOG00000048169	Tuba8	1.81121	1.37159e-111	1.93941e-109
ENSRNOG00000018462	Rabep2	0.800909	1.5911e-111	2.23165e-109
ENSRNOG00000020533	Htra1	-0.680144	2.56659e-111	3.57105e-109
ENSRNOG00000006787	Dhcr24	0.701929	4.64513e-111	6.41175e-109
ENSRNOG00000059166	Ldb3	0.825114	5.60538e-111	7.67628e-109
ENSRNOG00000011754	Myom2	0.830951	2.12848e-110	2.89208e-108
ENSRNOG00000029212	Vcan	-0.962213	4.443e-110	5.99013e-108
novel.1128	-	-0.975797	7.04543e-110	9.4257e-108
ENSRNOG00000004820	Sar1b	1.04995	4.22275e-109	5.60626e-107
ENSRNOG00000013279	LOC681458	0.923194	7.99309e-109	1.05315e-106
ENSRNOG00000001254	Col6a2	-0.717358	1.05892e-108	1.38472e-106
ENSRNOG00000004583	Mb	-0.721014	1.43882e-108	1.86746e-106
ENSRNOG00000003018	Olfml2b	-0.879599	3.02008e-108	3.89076e-106
ENSRNOG00000001249	Col6a1	-0.636224	2.47806e-107	3.169e-105
ENSRNOG00000016543	Trim63	1.23205	7.47563e-107	9.49023e-105
ENSRNOG00000011796	C1r	-0.72454	3.59359e-105	4.52897e-103
ENSRNOG00000009243	Oaf	-0.910682	9.44771e-105	1.18212e-102
ENSRNOG00000018494	Ppp1r3c	1.01183	9.82753e-105	1.22086e-102
ENSRNOG00000049075	Fabp5	0.822174	5.03472e-104	6.21021e-102
ENSRNOG00000050042	Myh8	-1.30299	9.00298e-104	1.10268e-101
ENSRNOG00000001224	Itgb2	0.979586	3.03631e-103	3.69283e-101
ENSRNOG00000014815	Myoz2	-2.27035	2.27475e-102	2.74739e-100
ENSRNOG00000058249	Pgk1	0.713478	2.70867e-102	3.24891e-100
ENSRNOG00000024243	Cadm4	1.38978	2.15566e-101	2.56789e-99
ENSRNOG00000010947	Mmp14	-0.831117	1.08432e-99	1.28289e-97
ENSRNOG00000014532	Lbp	-1.46789	1.44031e-99	1.69256e-97
ENSRNOG00000014940	Sfrp5	2.06769	1.53168e-99	1.78786e-97
ENSRNOG00000016151	Ankrd23	0.900595	2.14295e-99	2.48468e-97
ENSRNOG00000018911	Pfkfb3	0.866828	2.2477e-99	2.58887e-97
ENSRNOG00000001205	Agpat3	0.898985	8.72e-98	9.97751e-96
ENSRNOG00000007300	C1qtnf6	-1.02623	2.33805e-97	2.65773e-95
ENSRNOG00000012804	C1qc	-0.789753	2.74387e-97	3.09879e-95
ENSRNOG00000013009	Ldha	0.609882	1.41124e-96	1.5835e-94
ENSRNOG00000003334	Klhl21	1.0449	6.40174e-96	7.13711e-94
ENSRNOG00000036827	Ppp1r1a	1.40965	2.43165e-95	2.69371e-93
ENSRNOG00000000777	RT1-S3	-0.762479	3.32083e-95	3.65544e-93
ENSRNOG00000008170	Jph2	1.01017	8.36021e-95	9.1447e-93
ENSRNOG00000019124	Elovl3	1.03359	1.46996e-94	1.59785e-92
ENSRNOG00000021201	Txnip	0.520959	1.49216e-94	1.61191e-92
ENSRNOG00000020369	Igf2	-0.868551	2.2196e-94	2.38292e-92
ENSRNOG00000019630	Hacl1	1.05609	5.26843e-93	5.62138e-91
ENSRNOG00000052444	RGD1563091	-1.27331	6.03747e-93	6.40266e-91
ENSRNOG00000020956	Bcat2	0.924832	3.81845e-90	4.02487e-88
ENSRNOG00000020332	Tnnt3	0.782618	7.31353e-90	7.66246e-88
ENSRNOG00000018384	Adam12	-1.47929	1.84172e-88	1.91804e-86
ENSRNOG00000016975	Pxmp4	1.05798	9.4169e-88	9.74874e-86
ENSRNOG00000020525	Col5a3	-0.895789	1.16481e-87	1.19872e-85
ENSRNOG00000012817	Lrrc17	-1.15135	6.08274e-87	6.223e-85
ENSRNOG00000010047	Ddit4l	1.4611	6.49245e-87	6.60331e-85
ENSRNOG00000007091	Ly6e	-0.686661	1.91971e-86	1.94114e-84
ENSRNOG00000020792	Etv4	1.61889	4.9146e-86	4.94073e-84
ENSRNOG00000043219	Fbn2	-1.37056	6.66055e-86	6.65749e-84
ENSRNOG00000005580	Itgb4	0.715482	1.84036e-84	1.829e-82
ENSRNOG00000008246	Emilin1	-1.06187	2.97076e-84	2.93565e-82
ENSRNOG00000015461	Serpine2	-0.95357	3.96389e-83	3.89491e-81
ENSRNOG00000023148	Col11a1	-1.42726	5.85475e-83	5.72055e-81
ENSRNOG00000016924	Acly	0.713244	2.56258e-82	2.48986e-80
ENSRNOG00000042980	Adam19	-0.947286	7.62787e-82	7.37022e-80
novel.158	-	-0.697953	1.25691e-81	1.20775e-79
ENSRNOG00000060614	Pxdn	-0.754909	1.47437e-81	1.40892e-79
ENSRNOG00000000383	Mypn	0.869056	2.12681e-81	2.02128e-79
ENSRNOG00000058340	Krt79	0.873879	3.54138e-81	3.34737e-79
ENSRNOG00000012134	Scn4a	0.967559	7.37109e-81	6.92963e-79
ENSRNOG00000021719	Slfn5	-0.758022	2.63347e-80	2.46243e-78
ENSRNOG00000017716	Ucp3	1.43932	1.20619e-79	1.12182e-77
ENSRNOG00000050630	AABR07070043.1	0.809887	2.03884e-79	1.88614e-77
ENSRNOG00000011196	Krt25	1.40073	3.98245e-79	3.6647e-77
ENSRNOG00000014398	Scara5	-0.896501	8.96491e-79	8.2062e-77
ENSRNOG00000018824	Slc7a5	0.915005	1.30608e-78	1.18929e-76
ENSRNOG00000011101	Twist1	-1.0361	1.39864e-78	1.26693e-76
ENSRNOG00000026604	Cercam	-0.866002	4.5154e-78	4.06901e-76
ENSRNOG00000022296	Pnpla5	1.17667	6.58609e-78	5.90439e-76
ENSRNOG00000033933	Stfa3	-1.37408	1.58727e-77	1.41568e-75
ENSRNOG00000011427	Hr	0.771855	3.34357e-77	2.9669e-75
ENSRNOG00000016552	Hmgcs1	0.831492	4.35511e-77	3.84488e-75
ENSRNOG00000027008	Igtp	-1.14094	4.65072e-76	4.08511e-74
ENSRNOG00000008947	Cpz	-0.855429	1.53339e-75	1.34014e-73
ENSRNOG00000037198	Usp18	-1.11736	2.04647e-75	1.77961e-73
ENSRNOG00000016243	Casq2	-0.868486	3.09991e-75	2.68227e-73
ENSRNOG00000019244	Mxra8	-0.787393	5.81131e-75	5.00348e-73
ENSRNOG00000004278	Dlx3	1.61181	6.92737e-75	5.93502e-73
ENSRNOG00000015505	Mfap5	-0.799597	8.8135e-75	7.51394e-73
ENSRNOG00000018598	Ankrd1	-0.862291	9.79605e-75	8.31088e-73
ENSRNOG00000028448	Elovl1	0.807676	4.07616e-74	3.44139e-72
ENSRNOG00000050500	Tob2	0.929911	8.16188e-74	6.85755e-72
ENSRNOG00000025087	Krt73	1.63817	1.4038e-73	1.17379e-71
ENSRNOG00000000658	Acacb	0.823653	4.31394e-73	3.58986e-71
ENSRNOG00000050675	Myl4	-0.966749	1.32506e-72	1.0974e-70
ENSRNOG00000016684	Wnk2	1.08555	1.81134e-72	1.49303e-70
ENSRNOG00000028548	Ccl9	1.34748	5.23083e-72	4.29125e-70
ENSRNOG00000012477	Eef1a2	0.544174	6.60385e-72	5.39221e-70
ENSRNOG00000005413	Creb3l1	-1.01732	1.01346e-71	8.23651e-70
ENSRNOG00000048273	Apod	0.77674	1.15778e-71	9.36563e-70
ENSRNOG00000012807	C1qa	-0.717477	1.21714e-71	9.80023e-70
ENSRNOG00000008016	Ckap4	-0.869593	3.22361e-70	2.58364e-68
ENSRNOG00000013954	Alpl	-1.29628	1.33618e-69	1.066e-67
ENSRNOG00000007541	Fhl3	0.994857	2.0546e-69	1.63167e-67
ENSRNOG00000031081	Stat2	-0.864051	2.8579e-69	2.2593e-67
ENSRNOG00000013481	Cdh11	-1.20721	2.06175e-68	1.62254e-66
ENSRNOG00000006197	Calu	-0.682824	1.30509e-67	1.02244e-65
ENSRNOG00000016848	Fzd4	0.761544	1.62314e-67	1.26284e-65
novel.752	-	1.15938	1.62648e-67	1.26284e-65
ENSRNOG00000000477	Daxx	-0.849083	1.95146e-67	1.50843e-65
ENSRNOG00000033734	Tnnt2	-1.51904	9.59634e-67	7.38493e-65
ENSRNOG00000055962	Bgn	-0.522855	1.47971e-66	1.13371e-64
ENSRNOG00000025868	Klhl33	1.60856	1.52108e-66	1.16029e-64
ENSRNOG00000025120	Gli1	1.08206	1.85492e-66	1.40877e-64
ENSRNOG00000016460	Clu	0.633197	2.0884e-66	1.57919e-64
ENSRNOG00000047046	Plin4	1.24067	2.83843e-66	2.13705e-64
ENSRNOG00000019211	Olfml3	-1.02389	4.5318e-66	3.39728e-64
ENSRNOG00000008194	Znfx1	-0.843817	7.23713e-66	5.40207e-64
ENSRNOG00000021174	Macrod1	0.854312	7.91299e-66	5.88131e-64
ENSRNOG00000007628	Ptp4a3	0.666839	1.19354e-65	8.83322e-64
ENSRNOG00000017416	Ppic	-0.89155	1.40604e-65	1.03618e-63
ENSRNOG00000014641	Rpl3l	0.822221	1.50186e-65	1.10212e-63
ENSRNOG00000012827	Mlf1	1.11549	1.81492e-65	1.32627e-63
ENSRNOG00000011971	C1s	-0.536121	2.00533e-65	1.45928e-63
ENSRNOG00000006314	Zbp1	-1.42045	4.41961e-65	3.20274e-63
ENSRNOG00000004578	Cthrc1	-0.808157	5.08546e-65	3.66997e-63
novel.182	-	1.53941	5.48885e-65	3.94472e-63
ENSRNOG00000009484	Ptcd3	0.860214	1.40222e-64	1.0036e-62
ENSRNOG00000016758	Loxl2	-0.953245	1.86019e-64	1.32592e-62
ENSRNOG00000018656	Ampd1	0.665804	2.846e-64	2.02031e-62
ENSRNOG00000001187	Oasl	-1.03803	6.00986e-64	4.24892e-62
ENSRNOG00000023227	AABR07052585.2	0.65273	9.4056e-64	6.62276e-62
ENSRNOG00000002664	Emp2	0.794567	1.89771e-63	1.33085e-61
ENSRNOG00000014079	Stat1	-0.723921	2.00335e-63	1.39929e-61
ENSRNOG00000019850	Speg	0.685924	4.05367e-63	2.82006e-61
ENSRNOG00000015085	Dmpk	0.663438	5.14053e-63	3.56192e-61
ENSRNOG00000011381	Acsbg1	0.825891	1.20637e-62	8.32589e-61
ENSRNOG00000005871	Il1rn	0.932694	1.54441e-62	1.06168e-60
ENSRNOG00000022298	Cxcl11	-1.69544	5.51233e-62	3.77442e-60
ENSRNOG00000002730	Rgs5	-1.03434	7.51541e-62	5.1258e-60
ENSRNOG00000011677	Slc39a10	0.878848	1.03287e-61	7.01708e-60
ENSRNOG00000028238	Sh3bgr	0.731245	1.40055e-61	9.47797e-60
ENSRNOG00000002934	Atp1b1	0.755895	1.4809e-61	9.98285e-60
ENSRNOG00000020058	Celsr2	0.888268	1.81544e-61	1.21908e-59
ENSRNOG00000003148	Timp2	-0.658765	2.18584e-61	1.46216e-59
ENSRNOG00000021220	Cpxm1	-0.84956	3.76468e-61	2.50863e-59
ENSRNOG00000023497	Foxe1	1.53803	4.22604e-61	2.80531e-59
ENSRNOG00000023463	Parp9	-0.892402	5.3069e-61	3.50942e-59
ENSRNOG00000002886	Myh10	-0.94732	6.44794e-61	4.24782e-59
ENSRNOG00000026371	Krt17	0.678854	7.8109e-61	5.12631e-59
ENSRNOG00000018461	Pdgfrb	-0.625733	1.39452e-60	9.11786e-59
ENSRNOG00000006741	Podnl1	-2.01536	1.9679e-60	1.28186e-58
ENSRNOG00000016043	Aqp4	1.6135	3.6445e-60	2.36512e-58
ENSRNOG00000014311	Slc7a8	0.930676	4.84917e-60	3.1352e-58
ENSRNOG00000008478	Mmp13	-1.7292	5.31267e-60	3.42214e-58
ENSRNOG00000025691	Pla2g7	1.17773	8.59125e-60	5.51361e-58
novel.465	-	-1.24056	1.28662e-59	8.20212e-58
ENSRNOG00000010233	Cald1	-0.705759	1.28748e-59	8.20212e-58
ENSRNOG00000005958	Rrbp1	-0.592646	1.62596e-59	1.03207e-57
ENSRNOG00000016281	Col4a1	-0.49049	1.69559e-59	1.07235e-57
ENSRNOG00000013754	Krt35	1.19374	2.74513e-59	1.72983e-57
ENSRNOG00000013474	Casz1	0.872711	6.99555e-59	4.39229e-57
ENSRNOG00000016122	Hmgcr	0.756605	1.2005e-58	7.51047e-57
ENSRNOG00000028624	Kif26b	-1.56091	2.38978e-58	1.48971e-56
ENSRNOG00000017369	Mustn1	-0.762319	2.45637e-58	1.52576e-56
ENSRNOG00000026415	Col14a1	-0.586026	5.65989e-58	3.50309e-56
ENSRNOG00000057616	Ptch2	1.20032	2.97872e-57	1.83709e-55
ENSRNOG00000060728	Tuba1a	-0.683223	6.07136e-57	3.7312e-55
ENSRNOG00000007338	Fbln2	-0.555437	7.41956e-57	4.5437e-55
ENSRNOG00000002244	Pdgfra	-0.766077	8.90525e-57	5.43439e-55
ENSRNOG00000053239	Clmp	-0.806994	1.64708e-56	1.00161e-54
ENSRNOG00000000563	Adamts14	-0.961086	2.14633e-56	1.30066e-54
ENSRNOG00000016603	Rtn2	0.725161	2.58519e-56	1.56117e-54
novel.282	-	-1.76205	3.4806e-56	2.09462e-54
ENSRNOG00000006224	Klhl31	0.703149	6.14597e-56	3.68588e-54
ENSRNOG00000029195	Uba7	-1.0264	7.13273e-56	4.26297e-54
ENSRNOG00000001926	Cldn1	1.02526	7.59331e-56	4.5227e-54
ENSRNOG00000021771	Trim29	0.713481	9.54626e-56	5.6665e-54
ENSRNOG00000010805	Fabp4	0.473049	1.25175e-55	7.40493e-54
ENSRNOG00000014288	Fn1	-0.383958	1.29345e-55	7.62568e-54
ENSRNOG00000049766	Sctr	1.43616	1.66546e-55	9.78571e-54
ENSRNOG00000012991	Adgra2	-0.697391	1.83181e-55	1.07269e-53
ENSRNOG00000012749	C1qb	-0.831471	3.61659e-55	2.11073e-53
ENSRNOG00000052981	AABR07058464.1	-0.979044	4.44577e-55	2.58598e-53
ENSRNOG00000023410	Apol9a	-0.964068	5.22278e-55	3.02782e-53
ENSRNOG00000029342	Scn7a	1.38646	7.13603e-55	4.12325e-53
ENSRNOG00000042084	Acsm1	1.44505	8.07924e-55	4.65278e-53
ENSRNOG00000010463	Cpa4	1.16109	1.08403e-54	6.22229e-53
ENSRNOG00000003030	Awat2	0.999989	1.14801e-54	6.56784e-53
ENSRNOG00000004290	Grb10	-0.7289	1.23968e-54	7.06904e-53
ENSRNOG00000005825	Lyz2	0.468523	1.29667e-54	7.36984e-53
ENSRNOG00000031364	Kif1c	0.531319	1.79831e-54	1.01877e-52
ENSRNOG00000000579	Marcks	-0.650398	1.91161e-54	1.07944e-52
ENSRNOG00000012681	Lgals9	-0.79623	2.50622e-54	1.41062e-52
ENSRNOG00000013526	Rassf4	0.793654	3.70055e-54	2.07613e-52
ENSRNOG00000000239	Ccl7	-1.34609	7.0751e-54	3.9566e-52
ENSRNOG00000029543	Cish	1.1395	7.43279e-54	4.14331e-52
ENSRNOG00000016479	Plekhg4	-1.70626	8.64798e-54	4.80529e-52
ENSRNOG00000021088	Tmod4	0.732161	2.03355e-53	1.12636e-51
ENSRNOG00000018371	Tubb6	-0.564739	3.06065e-53	1.68987e-51
ENSRNOG00000037645	Tceal7	-1.53724	3.2524e-53	1.79006e-51
ENSRNOG00000007234	Cyp51	0.757908	3.52352e-53	1.93316e-51
ENSRNOG00000020955	Myl3	-1.41049	3.7711e-53	2.06248e-51
ENSRNOG00000030963	LOC108351137	0.753436	4.02557e-53	2.19476e-51
ENSRNOG00000002459	Fbxo40	1.43457	5.23849e-53	2.84712e-51
ENSRNOG00000004391	RGD1561812	1.26607	5.31929e-53	2.88203e-51
ENSRNOG00000010918	Cebpa	0.740517	5.92247e-53	3.19887e-51
ENSRNOG00000023972	Col4a2	-0.597374	6.34714e-53	3.41763e-51
ENSRNOG00000000525	Pi16	-0.672833	6.97394e-53	3.74354e-51
ENSRNOG00000061484	Adamts2	-0.567289	1.77171e-52	9.48111e-51
ENSRNOG00000013469	Txndc5	-0.598336	1.96661e-52	1.04918e-50
ENSRNOG00000057139	Myoz3	1.32257	2.13683e-52	1.13651e-50
ENSRNOG00000047706	RT1-CE16	-1.11372	2.22941e-52	1.18213e-50
ENSRNOG00000043203	Krt75	1.08266	1.91785e-51	1.01384e-49
ENSRNOG00000001314	Fam20c	0.886771	2.02588e-51	1.0677e-49
ENSRNOG00000057701	Myom1	0.665766	2.05019e-51	1.07725e-49
ENSRNOG00000013452	Rcn1	-0.610432	2.86769e-51	1.50225e-49
ENSRNOG00000017510	Mfge8	-0.550853	4.61064e-51	2.40806e-49
ENSRNOG00000019354	Ptch1	0.926621	9.51845e-51	4.95643e-49
ENSRNOG00000004111	Soat1	0.842292	1.38658e-50	7.19861e-49
ENSRNOG00000018355	Msx2	1.54479	1.61466e-50	8.3578e-49
ENSRNOG00000048315	Eif2ak2	-0.871104	1.86364e-50	9.61792e-49
ENSRNOG00000002470	Ifi47	-1.0261	2.52829e-50	1.30095e-48
ENSRNOG00000059350	Ppp1r3a	0.961502	5.49133e-50	2.81726e-48
ENSRNOG00000000875	Fhl1	-0.475826	6.59493e-50	3.3735e-48
ENSRNOG00000008336	Tnfrsf11b	-1.37506	8.75196e-50	4.46376e-48
ENSRNOG00000015787	P3h4	-1.02957	2.16533e-49	1.10115e-47
ENSRNOG00000051487	Kremen1	-0.735286	3.34685e-49	1.69704e-47
ENSRNOG00000008436	Krt85	1.22778	3.75469e-49	1.8983e-47
ENSRNOG00000016214	Agl	0.636076	5.73626e-49	2.89174e-47
ENSRNOG00000030729	C4b	-0.58929	9.96187e-49	5.00742e-47
ENSRNOG00000027341	Tenm2	1.19846	1.08967e-48	5.46152e-47
ENSRNOG00000003715	Srpx2	-1.09664	1.22282e-48	6.11128e-47
ENSRNOG00000021808	Tecr	0.611606	1.61379e-48	8.04214e-47
ENSRNOG00000000967	Aacs	0.782353	3.06059e-48	1.52085e-46
ENSRNOG00000001414	Serpine1	-0.592848	4.07697e-48	2.02013e-46
ENSRNOG00000019077	Lipa	0.774136	4.91079e-48	2.42638e-46
ENSRNOG00000001369	Oas1a	-0.983927	5.21644e-48	2.57009e-46
ENSRNOG00000010389	Ndrg2	0.510674	9.97891e-48	4.90263e-46
ENSRNOG00000016541	Enc1	-0.674213	1.01652e-47	4.98006e-46
ENSRNOG00000023334	Parp14	-1.05696	1.09278e-47	5.33867e-46
ENSRNOG00000032728	LOC689230	-1.24268	1.45402e-47	7.08356e-46
ENSRNOG00000018434	Stab1	-0.753149	1.66348e-47	8.08134e-46
ENSRNOG00000026704	Drp2	1.6738	1.90803e-47	9.24357e-46
ENSRNOG00000049437	Gpc1	-0.670151	2.06691e-47	9.98548e-46
ENSRNOG00000022921	Dact2	-1.65829	2.5004e-47	1.20463e-45
ENSRNOG00000028616	Pck1	0.760327	2.78738e-47	1.33918e-45
ENSRNOG00000000457	Tap1	-0.704303	3.27518e-47	1.5692e-45
ENSRNOG00000018166	Prkab2	0.838367	5.13587e-47	2.45393e-45
ENSRNOG00000020455	Cst6	0.912046	5.87657e-47	2.80015e-45
ENSRNOG00000019009	Arrdc2	1.24945	9.30228e-47	4.42036e-45
ENSRNOG00000014441	Krt16	-2.13095	9.94145e-47	4.71122e-45
ENSRNOG00000006845	Psapl1	1.05817	1.70618e-46	8.06353e-45
ENSRNOG00000003221	Myoc	1.23898	1.74459e-46	8.22276e-45
ENSRNOG00000038539	Lrrc15	-1.33611	3.97057e-46	1.86638e-44
ENSRNOG00000028895	Rtp4	-0.869613	7.93702e-46	3.72077e-44
ENSRNOG00000051619	Asb2	0.909609	8.17634e-46	3.82266e-44
ENSRNOG00000046667	Fosb	-0.893093	1.19219e-45	5.55889e-44
ENSRNOG00000015385	Pink1	0.507005	1.9586e-45	9.10799e-44
novel.573	-	-1.09072	2.46126e-45	1.1415e-43
ENSRNOG00000014064	Ctsh	-0.545284	2.58559e-45	1.19597e-43
ENSRNOG00000012404	Thrsp	0.928412	2.6183e-45	1.20789e-43
ENSRNOG00000002134	Mpa2l	-1.96383	3.6534e-45	1.68095e-43
ENSRNOG00000023449	Atg9b	1.11615	3.71682e-45	1.70562e-43
ENSRNOG00000004604	Slc38a10	-0.648045	5.23019e-45	2.39377e-43
ENSRNOG00000014961	Pdpn	-0.925891	7.9334e-45	3.62146e-43
ENSRNOG00000051922	-	-1.12105	8.37372e-45	3.81245e-43
ENSRNOG00000014008	Mfsd2a	1.04273	9.37946e-45	4.25921e-43
ENSRNOG00000000700	Tmem119	-1.0851	1.13974e-44	5.16207e-43
ENSRNOG00000028679	Hoxc13	1.54584	1.15546e-44	5.21966e-43
ENSRNOG00000016071	P3h3	-0.60155	2.08287e-44	9.38478e-43
ENSRNOG00000029191	LOC685067	-1.32109	2.3242e-44	1.04451e-42
ENSRNOG00000011984	Cxcl14	0.838566	2.58182e-44	1.1573e-42
ENSRNOG00000058329	Prrx2	-0.857006	3.01335e-44	1.34726e-42
ENSRNOG00000058003	Spon1	-0.63712	3.59901e-44	1.60497e-42
ENSRNOG00000003147	Sqstm1	0.464807	4.07467e-44	1.81245e-42
ENSRNOG00000019977	Ptprf	0.560897	4.44397e-44	1.97167e-42
ENSRNOG00000021243	Siglec1	-0.768142	1.22004e-43	5.39924e-42
ENSRNOG00000004589	Galnt16	-0.79515	4.75508e-43	2.09899e-41
ENSRNOG00000010079	Car3	0.35358	5.11162e-43	2.25066e-41
ENSRNOG00000014170	Dbn1	-0.648893	5.79333e-43	2.54438e-41
novel.993	-	-2.30159	7.84872e-43	3.43841e-41
ENSRNOG00000011994	Perp	0.534019	9.99782e-43	4.3689e-41
ENSRNOG00000061231	Selenom	-0.670589	1.14752e-42	5.00194e-41
ENSRNOG00000015078	Ifitm3	-0.657986	1.99067e-42	8.65541e-41
ENSRNOG00000015591	Cndp2	-0.667651	2.00982e-42	8.71689e-41
ENSRNOG00000004147	Abca8a	0.836263	2.02049e-42	8.74139e-41
ENSRNOG00000031890	Ncam1	-0.91408	2.11851e-42	9.14271e-41
ENSRNOG00000006738	Fbxo32	0.902447	2.27489e-42	9.79329e-41
ENSRNOG00000033747	Sp110	-0.925273	2.3347e-42	1.0026e-40
ENSRNOG00000002926	Uap1	-0.797788	3.04847e-42	1.30589e-40
ENSRNOG00000046231	Cacna1s	0.61287	4.21346e-42	1.8005e-40
ENSRNOG00000040350	Mir675	0.571291	4.43372e-42	1.88998e-40
ENSRNOG00000021314	Fdft1	0.80565	5.60597e-42	2.38384e-40
ENSRNOG00000029386	RT1-N2	-0.747549	8.61125e-42	3.65285e-40
ENSRNOG00000051372	Mycn	1.48401	1.06174e-41	4.4929e-40
ENSRNOG00000006120	Shh	1.78318	1.35372e-41	5.71452e-40
ENSRNOG00000029500	Tapbp	-0.703232	1.45106e-41	6.11062e-40
ENSRNOG00000016687	Ssc5d	-0.672018	1.50773e-41	6.33392e-40
ENSRNOG00000023628	Tmem106a	-1.0672	4.61756e-41	1.93515e-39
ENSRNOG00000012892	Abca4	-1.56852	4.79073e-41	2.00289e-39
ENSRNOG00000010800	Hadhb	0.596899	8.21524e-41	3.42637e-39
ENSRNOG00000017710	AC139642.1	1.19953	8.28064e-41	3.44538e-39
ENSRNOG00000008054	Igsf9	0.964759	1.14087e-40	4.73558e-39
ENSRNOG00000014610	Anpep	-0.483823	2.50571e-40	1.0376e-38
ENSRNOG00000018627	Plekhb1	1.15244	4.07853e-40	1.68489e-38
ENSRNOG00000030478	AY172581.9	-0.513846	5.20724e-40	2.14607e-38
ENSRNOG00000049495	Krt71	0.735755	6.11434e-40	2.51396e-38
ENSRNOG00000000640	Egr2	0.925781	8.20203e-40	3.36438e-38
ENSRNOG00000014872	Sec24d	-0.796511	1.38315e-39	5.66018e-38
ENSRNOG00000015519	Ces1d	0.890192	1.91758e-39	7.82878e-38
ENSRNOG00000039976	Ptk7	-0.719856	2.44365e-39	9.95316e-38
ENSRNOG00000029871	Slc8a3	1.04428	2.60395e-39	1.05813e-37
ENSRNOG00000026548	Dhrs7c	0.906111	2.83917e-39	1.15102e-37
ENSRNOG00000008855	Gjb2	0.798171	2.86237e-39	1.15773e-37
ENSRNOG00000006146	Trim54	0.69358	3.72593e-39	1.50351e-37
ENSRNOG00000009751	Gpx7	-0.755172	3.75284e-39	1.51087e-37
ENSRNOG00000020719	Hrc	0.51984	7.62619e-39	3.06316e-37
ENSRNOG00000049829	AABR07060872.1	-0.827229	1.042e-38	4.1757e-37
ENSRNOG00000054420	Vdr	0.918281	1.10349e-38	4.41192e-37
ENSRNOG00000059900	Bst2	-0.751873	1.21938e-38	4.8641e-37
ENSRNOG00000003486	Mnda	-0.869684	1.34734e-38	5.36221e-37
ENSRNOG00000053991	P3h1	-0.7843	1.434e-38	5.69408e-37
ENSRNOG00000008678	Antxr1	-0.779382	1.57742e-38	6.24932e-37
ENSRNOG00000047053	Thyn1	1.01692	1.77009e-38	6.99667e-37
ENSRNOG00000039668	Col8a1	-0.878879	1.86032e-38	7.33668e-37
ENSRNOG00000011483	S100a9	-1.52073	1.87365e-38	7.37252e-37
ENSRNOG00000018991	Gsn	0.400498	3.99104e-38	1.56687e-36
ENSRNOG00000032708	RT1-Bb	-0.725903	4.40406e-38	1.72512e-36
ENSRNOG00000009715	Me1	0.63911	5.29777e-38	2.07054e-36
ENSRNOG00000015177	Sun2	0.622176	6.08844e-38	2.37422e-36
ENSRNOG00000019527	Chrnd	-0.953139	6.42206e-38	2.49871e-36
ENSRNOG00000036689	P4hb	-0.43096	6.99559e-38	2.71579e-36
ENSRNOG00000009845	Acadm	0.549746	8.63744e-38	3.34571e-36
ENSRNOG00000012181	Lpl	0.516692	1.03764e-37	4.01035e-36
ENSRNOG00000008629	Secisbp2l	0.567218	1.35811e-37	5.2373e-36
ENSRNOG00000000986	Camsap3	1.07808	1.62449e-37	6.25069e-36
ENSRNOG00000001229	Col18a1	-0.416907	1.93666e-37	7.43539e-36
ENSRNOG00000008283	B4galt5	-0.640065	2.02441e-37	7.75518e-36
ENSRNOG00000006779	Crot	0.806869	2.13543e-37	8.16252e-36
ENSRNOG00000001344	Aldh2	0.497789	2.3085e-37	8.80469e-36
ENSRNOG00000017477	Mmp23	-0.88854	2.75183e-37	1.04726e-35
ENSRNOG00000059295	Selenoi	0.947484	3.97035e-37	1.50769e-35
ENSRNOG00000010872	Ckb	0.500652	5.99077e-37	2.26997e-35
ENSRNOG00000011789	Cdon	-0.828283	8.35944e-37	3.16059e-35
ENSRNOG00000007159	Ccl2	-1.08294	8.82349e-37	3.32881e-35
ENSRNOG00000040151	Sdr16c6	0.834289	8.90601e-37	3.35267e-35
ENSRNOG00000018184	Tpm1	0.3434	1.09726e-36	4.12172e-35
ENSRNOG00000003622	Cybb	0.600037	1.25506e-36	4.7043e-35
ENSRNOG00000018247	Dhx58	-0.920638	1.47146e-36	5.50357e-35
ENSRNOG00000023851	Igsf3	-0.85989	1.96858e-36	7.3471e-35
ENSRNOG00000047396	Rmnd5b	4.08325	2.02724e-36	7.54986e-35
ENSRNOG00000000142	Plxdc2	-0.757417	2.07673e-36	7.71764e-35
ENSRNOG00000013269	Tnfsf10	-0.768227	2.56538e-36	9.51324e-35
ENSRNOG00000017226	Slc2a4	0.77328	2.77951e-36	1.02854e-34
ENSRNOG00000017206	Igfbp5	-0.347073	3.3622e-36	1.23931e-34
ENSRNOG00000015018	Pdia3	-0.472302	3.36334e-36	1.23931e-34
ENSRNOG00000059801	Lima1	-0.532769	5.20997e-36	1.91568e-34
ENSRNOG00000031643	Dchs1	-0.759285	5.61534e-36	2.06038e-34
ENSRNOG00000014350	Cyr61	-0.620369	7.6692e-36	2.80806e-34
ENSRNOG00000019404	Hhatl	0.755593	7.88121e-36	2.87962e-34
ENSRNOG00000000341	Nid2	-0.583223	1.49138e-35	5.43776e-34
ENSRNOG00000002568	Socs1	-1.30859	1.84535e-35	6.7143e-34
ENSRNOG00000013267	Helz2	-0.754796	2.0173e-35	7.32461e-34
ENSRNOG00000048430	Myo18b	0.584673	2.09503e-35	7.59097e-34
ENSRNOG00000008592	Barx2	1.03585	2.39113e-35	8.64586e-34
ENSRNOG00000013324	Cdh5	-0.47898	2.56791e-35	9.26578e-34
novel.468	-	-1.35715	3.02452e-35	1.08908e-33
ENSRNOG00000016408	Kirrel	-0.619501	3.94696e-35	1.41829e-33
ENSRNOG00000001228	Pofut2	-0.622967	5.2212e-35	1.87231e-33
ENSRNOG00000000560	Lrrc20	0.911431	6.08411e-35	2.17726e-33
ENSRNOG00000039473	Ccdc152	-0.870408	7.48658e-35	2.67365e-33
ENSRNOG00000017307	Prss23	-0.558601	8.53162e-35	3.04061e-33
ENSRNOG00000008144	Irf1	-0.845255	9.95004e-35	3.53888e-33
ENSRNOG00000032994	Myom3	-1.13559	1.1634e-34	4.12935e-33
ENSRNOG00000000123	Rnf19b	-0.633659	1.19749e-34	4.2417e-33
ENSRNOG00000008586	Aldh1l2	-1.14249	1.251e-34	4.42225e-33
ENSRNOG00000016343	Dkk3	-0.675818	1.42206e-34	5.01673e-33
ENSRNOG00000017118	P4ha3	-1.13074	1.71802e-34	6.04856e-33
ENSRNOG00000008050	Stac3	0.701187	1.9742e-34	6.93642e-33
ENSRNOG00000002947	Dpt	-0.405013	2.32031e-34	8.13604e-33
ENSRNOG00000049056	-	0.634764	2.45371e-34	8.58649e-33
ENSRNOG00000002810	Gfpt2	-0.809193	2.52907e-34	8.83244e-33
ENSRNOG00000001757	Tm4sf19	1.22754	2.72674e-34	9.50372e-33
ENSRNOG00000016050	Fgfr1	-0.518791	2.89917e-34	1.00845e-32
ENSRNOG00000045924	RT1-T24-3	-0.639948	3.40028e-34	1.18039e-32
ENSRNOG00000019542	LOC100910979	-1.57859	4.61676e-34	1.59949e-32
ENSRNOG00000023177	Esrp2	0.858004	4.89886e-34	1.69386e-32
ENSRNOG00000014791	Peg3	-0.611497	6.07636e-34	2.09683e-32
ENSRNOG00000031479	Hdlbp	-0.366456	6.15913e-34	2.12118e-32
ENSRNOG00000024101	Phkb	0.809112	6.39602e-34	2.19841e-32
ENSRNOG00000042189	Rab31	-0.565507	6.75054e-34	2.31569e-32
ENSRNOG00000025219	RGD1559622	0.745747	9.18693e-34	3.14526e-32
ENSRNOG00000015445	Mal	1.34924	1.01307e-33	3.46156e-32
ENSRNOG00000053891	Phf11b	-1.00316	1.04071e-33	3.54904e-32
ENSRNOG00000010551	Lhx2	1.02259	1.09423e-33	3.72425e-32
ENSRNOG00000045829	Thbs1	-0.625781	1.14143e-33	3.8773e-32
ENSRNOG00000000488	Hmga1	0.647637	1.26371e-33	4.28431e-32
novel.436	-	-1.45981	1.30353e-33	4.41071e-32
ENSRNOG00000007999	Abra	0.887434	1.48175e-33	5.004e-32
ENSRNOG00000008364	Cat	0.589369	1.55582e-33	5.24397e-32
ENSRNOG00000016618	Tmem52	0.793648	1.607e-33	5.40599e-32
ENSRNOG00000016456	Il33	-0.679606	1.6953e-33	5.69201e-32
ENSRNOG00000028036	Adamts7	-0.838137	1.99432e-33	6.6831e-32
ENSRNOG00000001351	Trafd1	-0.532263	2.09355e-33	7.00213e-32
ENSRNOG00000000599	Lama4	-0.496598	2.59086e-33	8.6488e-32
ENSRNOG00000011559	Cnn3	-0.516376	3.88404e-33	1.29409e-31
ENSRNOG00000007081	Xdh	-0.380355	4.23406e-33	1.40801e-31
ENSRNOG00000043098	Mt2A	0.716363	4.56262e-33	1.51437e-31
ENSRNOG00000018220	Pde4dip	0.433048	4.63927e-33	1.53688e-31
ENSRNOG00000012442	Cemip	-1.87491	5.3479e-33	1.76826e-31
ENSRNOG00000007370	Rnf144a	-0.816407	5.37558e-33	1.77404e-31
ENSRNOG00000026231	Awat1	1.09868	5.74456e-33	1.89222e-31
ENSRNOG00000015718	RGD1307461	1.14934	7.09548e-33	2.33279e-31
ENSRNOG00000025053	Lrp1	-0.335282	7.25548e-33	2.38089e-31
ENSRNOG00000006756	Maged1	-0.536408	9.1349e-33	2.99198e-31
ENSRNOG00000002827	Rbfox1	0.720848	1.04774e-32	3.42523e-31
ENSRNOG00000021031	Grn	-0.422626	1.23611e-32	4.03347e-31
ENSRNOG00000016962	Neu2	1.16679	1.54196e-32	5.02206e-31
ENSRNOG00000017854	Ucp2	0.529096	1.7548e-32	5.70457e-31
novel.894	-	-1.04947	1.98205e-32	6.4313e-31
ENSRNOG00000043377	Fdps	0.552948	2.65877e-32	8.61105e-31
ENSRNOG00000057125	Ddr1	0.567089	2.90594e-32	9.39406e-31
ENSRNOG00000007613	C1qtnf5	-0.712452	4.23014e-32	1.36495e-30
ENSRNOG00000003649	Qsox1	0.575954	4.94391e-32	1.5923e-30
ENSRNOG00000021125	Prdx5	0.527439	5.82017e-32	1.87106e-30
ENSRNOG00000046005	Scd2	0.372602	6.12056e-32	1.964e-30
ENSRNOG00000008257	Mfap2	-0.62443	6.43665e-32	2.06163e-30
ENSRNOG00000017359	Itm2c	-0.408708	7.15339e-32	2.28698e-30
ENSRNOG00000047307	Cntfr	0.960684	8.23249e-32	2.62715e-30
ENSRNOG00000021087	Lgi4	0.88297	9.62656e-32	3.06639e-30
ENSRNOG00000019138	Clec11a	-0.698606	1.32687e-31	4.2188e-30
ENSRNOG00000010473	Cand2	0.722907	2.02328e-31	6.42132e-30
ENSRNOG00000003967	Vmp1	-0.531737	2.44636e-31	7.74992e-30
ENSRNOG00000006418	Samhd1	-0.866695	2.55719e-31	8.0863e-30
ENSRNOG00000012623	Arf4	-0.52229	2.8853e-31	9.10728e-30
ENSRNOG00000000186	Tst	1.01247	2.96261e-31	9.33438e-30
ENSRNOG00000023803	Cmya5	0.539261	3.13329e-31	9.85428e-30
ENSRNOG00000011622	Echdc1	0.668847	3.85797e-31	1.21115e-29
ENSRNOG00000001285	Atp2a2	-0.410685	5.16963e-31	1.62e-29
ENSRNOG00000009144	Lad1	0.719177	5.39557e-31	1.68777e-29
ENSRNOG00000029651	Rdh16	0.99646	8.13684e-31	2.54068e-29
ENSRNOG00000030715	Cfh	-0.801456	8.70836e-31	2.71426e-29
ENSRNOG00000020308	Ech1	0.4847	1.02878e-30	3.2008e-29
ENSRNOG00000010068	Plpp7	0.705275	1.09948e-30	3.41467e-29
ENSRNOG00000033517	LOC100360791	-0.538848	1.10628e-30	3.42966e-29
ENSRNOG00000013840	Ankrd2	-1.69475	1.35699e-30	4.19943e-29
ENSRNOG00000007713	Tmcc3	0.674849	1.82611e-30	5.64115e-29
ENSRNOG00000025160	Tmem56	0.965267	1.85323e-30	5.7148e-29
ENSRNOG00000016945	Pla2g2a	1.731	1.89046e-30	5.81927e-29
ENSRNOG00000018748	Slc16a11	1.23927	2.48051e-30	7.62208e-29
ENSRNOG00000008445	Dact1	-1.04999	3.03227e-30	9.3011e-29
ENSRNOG00000020482	Nfatc4	-0.641801	3.37891e-30	1.03461e-28
ENSRNOG00000006403	Nectin1	0.697866	3.6094e-30	1.10325e-28
ENSRNOG00000007078	Wisp1	-1.44412	4.30639e-30	1.31398e-28
ENSRNOG00000060021	Txlnb	0.684862	4.55247e-30	1.38663e-28
ENSRNOG00000025520	Lbx1	1.00411	4.72467e-30	1.43656e-28
ENSRNOG00000032922	Dclk1	-0.571126	4.75538e-30	1.44338e-28
ENSRNOG00000009884	Lgals1	-0.421101	5.44316e-30	1.64926e-28
ENSRNOG00000020038	Chpf	-0.580973	5.49879e-30	1.66322e-28
ENSRNOG00000023551	Sp6	1.8533	6.1551e-30	1.8585e-28
ENSRNOG00000010966	Itgb1	-0.402024	6.64804e-30	2.00386e-28
ENSRNOG00000051548	Lmod1	0.676137	7.18247e-30	2.1612e-28
ENSRNOG00000006227	Ifih1	-1.07577	7.34542e-30	2.20642e-28
ENSRNOG00000016917	Clcn1	1.07753	8.64055e-30	2.59097e-28
ENSRNOG00000045543	Frat2	1.20894	1.25897e-29	3.76866e-28
ENSRNOG00000019622	Ackr3	-0.654188	1.39957e-29	4.17704e-28
ENSRNOG00000004392	Aatk	0.950452	1.40019e-29	4.17704e-28
ENSRNOG00000053430	Slco4a1	1.03439	1.56439e-29	4.65498e-28
ENSRNOG00000006950	Padi3	1.46024	1.56575e-29	4.65498e-28
ENSRNOG00000029768	Ccl12	-2.25237	1.95232e-29	5.79432e-28
ENSRNOG00000020014	Myh14	0.727451	2.23233e-29	6.6141e-28
ENSRNOG00000020716	Axl	-0.425416	2.32654e-29	6.88151e-28
ENSRNOG00000032844	RT1-Da	-0.384965	2.77989e-29	8.20845e-28
ENSRNOG00000055583	Ttyh3	-0.465485	3.29057e-29	9.69994e-28
ENSRNOG00000042233	Rpl41	-0.360211	3.31767e-29	9.76328e-28
ENSRNOG00000013766	Acaa2	0.504899	3.365e-29	9.88583e-28
novel.442	-	-1.21409	3.54859e-29	1.04076e-27
ENSRNOG00000006997	App	-0.359727	3.7148e-29	1.08767e-27
ENSRNOG00000033618	Col28a1	1.8253	3.80004e-29	1.11076e-27
ENSRNOG00000003538	Adamts4	-0.911525	4.1537e-29	1.2121e-27
ENSRNOG00000038286	Slamf6	1.37676	4.58227e-29	1.33492e-27
ENSRNOG00000017250	Gmpr	0.674076	4.67699e-29	1.36024e-27
ENSRNOG00000002488	Galnt10	-0.761668	6.43008e-29	1.86698e-27
ENSRNOG00000005388	Rassf3	0.508726	8.3725e-29	2.42691e-27
ENSRNOG00000002449	Maged2	-0.776272	1.10605e-28	3.20074e-27
ENSRNOG00000005903	St14	0.742246	1.12852e-28	3.26033e-27
ENSRNOG00000017123	B2m	-0.309709	1.38995e-28	4.00896e-27
ENSRNOG00000050792	Tnfaip6	-0.934164	1.60882e-28	4.63255e-27
ENSRNOG00000018390	Pld3	0.482892	1.84533e-28	5.30478e-27
ENSRNOG00000016781	Ppib	-0.440865	2.06496e-28	5.92638e-27
ENSRNOG00000007740	Tacstd2	0.787459	2.06884e-28	5.92771e-27
ENSRNOG00000019019	Fitm1	0.623631	2.4294e-28	6.94936e-27
ENSRNOG00000029079	Hspb7	-0.698576	3.07807e-28	8.79046e-27
ENSRNOG00000061376	Psca	1.71938	3.1728e-28	9.04613e-27
ENSRNOG00000017952	2019-09-02	-0.396623	3.29393e-28	9.3761e-27
ENSRNOG00000016037	Mafb	-0.556928	3.35771e-28	9.54203e-27
ENSRNOG00000003720	Prrx1	-0.824607	4.30498e-28	1.22141e-26
ENSRNOG00000006142	Tmem8c	-1.32745	4.41677e-28	1.25108e-26
ENSRNOG00000020583	Fcgrt	-0.46643	4.46182e-28	1.26179e-26
ENSRNOG00000000920	Phkg1	1.04375	5.72606e-28	1.61668e-26
ENSRNOG00000033663	P4ha2	-0.568685	6.16377e-28	1.73745e-26
ENSRNOG00000022784	Fzd10	1.20882	6.41679e-28	1.80584e-26
ENSRNOG00000021412	Slfn13	-0.511531	7.34699e-28	2.06428e-26
ENSRNOG00000049942	RGD1564899	0.629214	7.45795e-28	2.09208e-26
ENSRNOG00000036794	Asb16	1.06022	7.52358e-28	2.10709e-26
ENSRNOG00000004292	Sptssa	0.648669	7.70659e-28	2.15487e-26
ENSRNOG00000020587	Efemp2	-0.629655	9.13808e-28	2.55103e-26
ENSRNOG00000023400	Dtx3l	-0.932887	9.50892e-28	2.65031e-26
ENSRNOG00000053232	Ror2	-0.791262	1.04771e-27	2.9155e-26
ENSRNOG00000014327	Csrp3	-1.51982	1.13899e-27	3.16443e-26
ENSRNOG00000020467	Nrep	-0.783171	1.53285e-27	4.25189e-26
ENSRNOG00000037371	XAF1	-1.15528	1.53731e-27	4.25746e-26
ENSRNOG00000007743	Mgst1	0.630648	1.5944e-27	4.40855e-26
novel.32	-	1.28693	1.69528e-27	4.68005e-26
ENSRNOG00000000288	Scarf2	-0.639484	2.10971e-27	5.8149e-26
novel.587	-	1.39802	2.38207e-27	6.55521e-26
ENSRNOG00000033220	Oas1b	-0.702661	2.45063e-27	6.73322e-26
ENSRNOG00000024629	Hadha	0.436261	2.53271e-27	6.94777e-26
ENSRNOG00000012794	Grhpr	0.823616	2.65448e-27	7.27035e-26
ENSRNOG00000018681	Nes	-0.697807	2.6884e-27	7.35167e-26
ENSRNOG00000018950	Fa2h	1.89208	3.21768e-27	8.78522e-26
ENSRNOG00000017409	Wnt6	1.60933	3.57351e-27	9.74146e-26
ENSRNOG00000027456	Cdc42bpg	0.673003	3.65394e-27	9.94512e-26
ENSRNOG00000010832	Pdgfrl	-0.837179	3.67229e-27	9.97944e-26
ENSRNOG00000005480	Ybx3	0.347742	3.95988e-27	1.07442e-25
ENSRNOG00000025764	AC128848.1	0.686923	3.96891e-27	1.07519e-25
ENSRNOG00000013927	Jag2	0.486135	4.03026e-27	1.09011e-25
ENSRNOG00000001989	Alcam	0.725938	4.29279e-27	1.15932e-25
ENSRNOG00000042975	Tmem45a	1.15439	5.26762e-27	1.42038e-25
ENSRNOG00000027489	Mn1	0.904885	6.45639e-27	1.73823e-25
ENSRNOG00000019018	Plat	-0.514733	1.04541e-26	2.81018e-25
ENSRNOG00000016678	Angptl2	-0.523112	1.22603e-26	3.2906e-25
ENSRNOG00000045558	Cd34	-0.631169	1.37969e-26	3.69732e-25
ENSRNOG00000016690	Idi1	0.818489	1.44536e-26	3.86734e-25
ENSRNOG00000009225	Copz2	-0.664758	1.47801e-26	3.94863e-25
ENSRNOG00000030183	Plod2	-0.892142	1.73219e-26	4.6206e-25
ENSRNOG00000058842	Sptbn2	0.923586	2.00196e-26	5.33201e-25
ENSRNOG00000042517	LOC102550416	-2.69869	2.15659e-26	5.73507e-25
ENSRNOG00000001976	Tmprss2	-1.72014	2.27599e-26	6.04335e-25
ENSRNOG00000006472	Hspa2	0.879301	2.46163e-26	6.52631e-25
ENSRNOG00000011891	Atp6v1b2	0.501667	2.59831e-26	6.87822e-25
ENSRNOG00000016810	Stmn1	0.619295	2.87112e-26	7.58883e-25
ENSRNOG00000010830	Slc25a4	0.309887	2.9908e-26	7.89317e-25
ENSRNOG00000058805	Aida	-0.599709	3.95337e-26	1.04177e-24
ENSRNOG00000005678	Lamb1	-0.398285	4.50709e-26	1.18589e-24
ENSRNOG00000031955	Calml3	0.575456	4.52285e-26	1.18824e-24
ENSRNOG00000017808	Klf15	0.935087	4.55094e-26	1.19382e-24
ENSRNOG00000031138	Irgm	-0.828117	4.73854e-26	1.24115e-24
novel.360	-	-1.94373	5.01057e-26	1.31043e-24
ENSRNOG00000060665	Afap1	-0.677089	5.35789e-26	1.39916e-24
ENSRNOG00000001821	Adipoq	0.546334	5.50433e-26	1.43525e-24
ENSRNOG00000002358	Scpep1	-0.38563	5.52989e-26	1.43976e-24
ENSRNOG00000039110	Lsmem1	0.900157	6.70667e-26	1.74353e-24
ENSRNOG00000005934	Mlip	0.905261	9.41867e-26	2.44492e-24
ENSRNOG00000033608	Cd276	-0.510327	1.08581e-25	2.81438e-24
ENSRNOG00000020355	Twist2	-0.866182	1.09514e-25	2.83433e-24
ENSRNOG00000033564	Cfd	0.433352	1.20317e-25	3.10928e-24
ENSRNOG00000059097	-	-1.14203	1.3407e-25	3.45957e-24
ENSRNOG00000009153	Cidec	0.674754	1.43505e-25	3.69754e-24
ENSRNOG00000011758	Fkbp7	-0.963382	1.46181e-25	3.76093e-24
ENSRNOG00000036677	Slc16a3	0.735612	1.57123e-25	4.03647e-24
ENSRNOG00000053288	Ank3	0.709126	1.58119e-25	4.05607e-24
ENSRNOG00000043201	Coq8a	0.489792	1.59811e-25	4.09342e-24
ENSRNOG00000004819	Porcn	0.664615	1.62833e-25	4.16469e-24
ENSRNOG00000017828	Egr3	0.814748	1.74449e-25	4.45523e-24
ENSRNOG00000011659	Alpk3	0.482337	2.50231e-25	6.38126e-24
ENSRNOG00000020150	Il18bp	0.751126	2.83925e-25	7.22989e-24
ENSRNOG00000010208	Timp1	-0.63409	3.33567e-25	8.48157e-24
ENSRNOG00000013577	Kdelr3	-0.798645	3.38546e-25	8.5956e-24
ENSRNOG00000007896	Klhl38	1.18351	3.74917e-25	9.50519e-24
ENSRNOG00000012659	Vamp5	0.767682	4.33827e-25	1.09827e-23
ENSRNOG00000033844	LOC100912195	-1.34295	5.00937e-25	1.26581e-23
ENSRNOG00000001440	Mdh2	0.434389	5.01462e-25	1.26581e-23
ENSRNOG00000055579	Tmbim6	0.332494	5.1713e-25	1.30347e-23
ENSRNOG00000048139	Ncmap	1.78575	5.36348e-25	1.34995e-23
ENSRNOG00000018992	Dpysl3	-0.79926	5.68932e-25	1.42989e-23
ENSRNOG00000011628	Krt27	1.46885	6.11479e-25	1.53461e-23
ENSRNOG00000020457	Tacc2	0.426256	6.92053e-25	1.73432e-23
ENSRNOG00000007060	Plin2	0.43235	1.0603e-24	2.65335e-23
ENSRNOG00000016496	Ctsc	-0.550671	1.09378e-24	2.73319e-23
ENSRNOG00000028768	Gbp4	-1.25075	1.12578e-24	2.80912e-23
ENSRNOG00000014099	Krt15	0.365809	1.21258e-24	3.02139e-23
ENSRNOG00000004307	Tor3a	-0.672094	1.33451e-24	3.32042e-23
ENSRNOG00000016587	Ninj1	-0.475388	1.68888e-24	4.19615e-23
ENSRNOG00000051235	C2	-0.654597	1.74047e-24	4.31816e-23
novel.997	-	0.711573	1.76232e-24	4.36613e-23
ENSRNOG00000024705	Rarres2	-0.882819	1.77204e-24	4.38396e-23
ENSRNOG00000021118	Nomo1	0.441368	2.55523e-24	6.31257e-23
ENSRNOG00000016751	Slc25a28	-0.461995	3.1609e-24	7.79779e-23
ENSRNOG00000006911	Sptb	0.548205	3.35777e-24	8.27172e-23
ENSRNOG00000010645	Lgals3	0.465134	3.48487e-24	8.57268e-23
ENSRNOG00000014117	Hmox1	-0.673663	3.7772e-24	9.27869e-23
ENSRNOG00000046007	Cldn3	1.39604	5.06768e-24	1.24312e-22
ENSRNOG00000019587	Ptprn	-1.25072	7.21812e-24	1.76813e-22
ENSRNOG00000001083	Kdelr2	-0.66511	7.55146e-24	1.84719e-22
ENSRNOG00000014644	Zic1	-1.26739	7.57952e-24	1.85145e-22
ENSRNOG00000012742	Irx2	0.72091	8.01548e-24	1.95519e-22
ENSRNOG00000033397	Adamts20	0.99362	8.11058e-24	1.97562e-22
ENSRNOG00000016874	Zfp521	-0.764256	1.00066e-23	2.43406e-22
ENSRNOG00000050404	Pmepa1	-0.575712	1.04237e-23	2.53196e-22
ENSRNOG00000001376	Mettl7a	0.499999	1.05879e-23	2.56828e-22
ENSRNOG00000008247	Ikbip	-0.868669	1.07016e-23	2.59223e-22
ENSRNOG00000010253	Cd163	-0.964179	1.0805e-23	2.61365e-22
ENSRNOG00000002418	Tgfb2	-0.774967	1.12449e-23	2.71627e-22
ENSRNOG00000029510	Plxnb1	0.660304	1.39689e-23	3.36959e-22
ENSRNOG00000014215	Klf9	0.568368	1.58332e-23	3.81399e-22
ENSRNOG00000004275	Egfl6	-2.31829	1.60385e-23	3.85811e-22
ENSRNOG00000016812	Adamts16	-1.35954	1.66308e-23	3.99507e-22
ENSRNOG00000018251	Mrc1	-0.639529	1.67706e-23	4.02309e-22
ENSRNOG00000028390	Hhipl1	-0.777234	2.15314e-23	5.15805e-22
ENSRNOG00000017869	Irf8	-0.571742	2.26973e-23	5.42987e-22
ENSRNOG00000050646	Fem1a	0.539017	2.28458e-23	5.45789e-22
ENSRNOG00000008738	Tp53i11	-0.793975	2.40832e-23	5.74562e-22
ENSRNOG00000057451	Itga5	-0.510537	2.43007e-23	5.78956e-22
novel.74	-	3.02137	2.45162e-23	5.8329e-22
ENSRNOG00000015380	Jup	0.43869	2.6498e-23	6.29581e-22
ENSRNOG00000003259	C1qtnf1	-0.436986	2.68608e-23	6.37329e-22
ENSRNOG00000011794	Tcea3	0.817305	2.99712e-23	7.10161e-22
ENSRNOG00000003452	Asb9	0.955865	3.17802e-23	7.52001e-22
ENSRNOG00000006930	Casq1	0.317228	3.49996e-23	8.27056e-22
ENSRNOG00000000611	Ube2d1	0.638187	3.86051e-23	9.11019e-22
ENSRNOG00000019689	Vwf	-0.498984	4.39898e-23	1.03668e-21
ENSRNOG00000011846	Krt28	1.19614	4.89338e-23	1.15163e-21
ENSRNOG00000014338	Slc25a25	0.616483	5.07086e-23	1.19179e-21
ENSRNOG00000015602	Cdh2	-1.17448	5.07965e-23	1.19224e-21
ENSRNOG00000017032	Atp5a1	0.323367	5.40369e-23	1.26659e-21
ENSRNOG00000000465	Slc39a7	-0.430883	6.5715e-23	1.53824e-21
ENSRNOG00000034102	Plk5	1.66583	6.61373e-23	1.54605e-21
novel.530	-	-0.573266	6.74493e-23	1.5746e-21
ENSRNOG00000010121	Lef1	1.06411	7.37588e-23	1.71959e-21
ENSRNOG00000011156	Clstn3	0.999823	7.6768e-23	1.78735e-21
ENSRNOG00000027434	Fitm2	0.688368	7.83019e-23	1.82063e-21
ENSRNOG00000005931	Cpq	-0.693754	7.84626e-23	1.82192e-21
ENSRNOG00000024382	Fcgr3a	-0.784397	8.11892e-23	1.88272e-21
ENSRNOG00000007922	Cldn19	1.73687	9.02209e-23	2.08938e-21
novel.593	-	-0.897389	9.26173e-23	2.14202e-21
ENSRNOG00000003840	Slit2	-0.840582	9.84956e-23	2.27495e-21
ENSRNOG00000049994	Ifi44l	-1.08032	1.14559e-22	2.64246e-21
ENSRNOG00000018322	Picalm	-0.419965	1.31452e-22	3.02809e-21
ENSRNOG00000013376	Mvd	0.678436	1.65829e-22	3.81496e-21
ENSRNOG00000005679	Fap	-0.790199	1.70313e-22	3.91293e-21
ENSRNOG00000006783	Neb	0.392942	1.86952e-22	4.28953e-21
ENSRNOG00000009630	Hsd17b12	0.549243	2.36861e-22	5.42751e-21
ENSRNOG00000033915	Gpt	0.60601	2.73835e-22	6.26649e-21
ENSRNOG00000015972	Ano5	1.01766	3.66425e-22	8.37434e-21
ENSRNOG00000009263	Ifi27	-0.400822	4.67114e-22	1.06615e-20
ENSRNOG00000006523	Atl2	0.657643	4.70325e-22	1.07207e-20
ENSRNOG00000060528	Cacna1g	-0.699301	4.75278e-22	1.08194e-20
ENSRNOG00000001924	Tp63	0.528337	5.10288e-22	1.16012e-20
ENSRNOG00000008292	Hif1a	-0.50873	6.51699e-22	1.47968e-20
ENSRNOG00000017441	Tpm3	-0.360369	6.68124e-22	1.51499e-20
ENSRNOG00000009550	Sqle	0.745443	7.39257e-22	1.67411e-20
ENSRNOG00000020193	Runx2	-0.894612	7.52958e-22	1.70292e-20
ENSRNOG00000033496	Igdcc4	-0.618756	7.54921e-22	1.70514e-20
ENSRNOG00000015869	Pccb	0.5508	7.85034e-22	1.77086e-20
ENSRNOG00000013102	Entpd2	0.649271	7.9799e-22	1.79775e-20
ENSRNOG00000001476	Cldn4	1.11297	8.30157e-22	1.8678e-20
ENSRNOG00000052564	Gpx3	-0.346374	8.4124e-22	1.89029e-20
ENSRNOG00000019728	Itgad	0.598496	8.61516e-22	1.93335e-20
ENSRNOG00000054978	Hist1h1c	0.51027	8.99877e-22	2.01684e-20
ENSRNOG00000001892	Tbx1	0.711621	9.48715e-22	2.12356e-20
ENSRNOG00000013176	Far1	0.579747	9.71435e-22	2.17162e-20
ENSRNOG00000007668	Mafa	0.648563	1.11889e-21	2.49805e-20
novel.825	-	-1.03964	1.29637e-21	2.89057e-20
novel.887	-	-0.339495	1.33348e-21	2.96952e-20
ENSRNOG00000047218	Clic5	0.612181	1.38405e-21	3.07818e-20
ENSRNOG00000015049	Scn5a	-0.985659	1.40531e-21	3.12147e-20
ENSRNOG00000015695	Sult5a1	1.07409	1.48779e-21	3.30047e-20
ENSRNOG00000052354	Arhgef40	-0.442817	1.49639e-21	3.30628e-20
ENSRNOG00000059947	Sdc1	0.351944	1.49746e-21	3.30628e-20
ENSRNOG00000015496	Tpm4	-0.353182	1.49762e-21	3.30628e-20
ENSRNOG00000013679	Sema4d	0.61783	1.49802e-21	3.30628e-20
ENSRNOG00000008030	Shc2	-0.60669	1.57337e-21	3.46819e-20
ENSRNOG00000014143	Col24a1	-1.36284	1.64685e-21	3.62556e-20
ENSRNOG00000025142	Mex3b	-1.1427	1.67932e-21	3.69237e-20
ENSRNOG00000013889	Tmed3	-0.56253	1.76984e-21	3.8865e-20
ENSRNOG00000015667	Epcam	0.730499	1.82024e-21	3.99213e-20
ENSRNOG00000052256	Dact3	-0.667949	1.96598e-21	4.30635e-20
ENSRNOG00000052583	Zfp106	0.480433	2.02276e-21	4.42513e-20
ENSRNOG00000016558	Pllp	1.3305	2.13861e-21	4.67271e-20
ENSRNOG00000042353	Mlkl	-0.820501	2.4245e-21	5.2907e-20
ENSRNOG00000025695	Tns3	0.462062	3.04525e-21	6.63698e-20
ENSRNOG00000010633	Acsl1	0.399424	3.29948e-21	7.18205e-20
ENSRNOG00000020744	Adar	-0.542259	3.57537e-21	7.77285e-20
ENSRNOG00000030021	Ccl6	-0.562519	3.6251e-21	7.87113e-20
ENSRNOG00000008061	Nuak1	-0.590472	3.79526e-21	8.23031e-20
ENSRNOG00000056585	Fscn1	-0.671523	3.80994e-21	8.25186e-20
ENSRNOG00000000824	Dse	-0.677266	3.85809e-21	8.34576e-20
ENSRNOG00000019254	Dyrk1b	0.582691	4.11491e-21	8.89026e-20
ENSRNOG00000001889	Comt	0.442525	4.48134e-21	9.66991e-20
ENSRNOG00000042516	-	1.50007	4.7135e-21	1.01583e-19
ENSRNOG00000010092	Magix	1.44091	5.65733e-21	1.21773e-19
ENSRNOG00000002881	Ddr2	-0.868921	6.06734e-21	1.30437e-19
ENSRNOG00000036690	Ppp1r27	1.05101	6.41255e-21	1.37688e-19
ENSRNOG00000008184	Esrp1	0.674131	6.71468e-21	1.43997e-19
ENSRNOG00000009355	Ogfr	-0.498885	7.03115e-21	1.50598e-19
ENSRNOG00000001053	Tmed2	-0.369921	7.25637e-21	1.55196e-19
ENSRNOG00000020251	Art1	0.740062	7.26365e-21	1.55196e-19
ENSRNOG00000002671	Nme2	-0.345629	7.60725e-21	1.62338e-19
ENSRNOG00000019322	Notch1	0.348355	7.78406e-21	1.65907e-19
ENSRNOG00000013743	Sec61a1	-0.41173	8.03444e-21	1.71034e-19
ENSRNOG00000014230	Map1a	-0.504168	8.92465e-21	1.89753e-19
ENSRNOG00000003553	Efemp1	-0.587815	9.46984e-21	2.01098e-19
ENSRNOG00000053703	Rn50_7_1411.1	-1.22565	1.06731e-20	2.26373e-19
ENSRNOG00000026302	Lrrn4cl	-0.868257	1.11444e-20	2.36083e-19
ENSRNOG00000015522	Tfap2a	0.769032	1.13463e-20	2.40067e-19
ENSRNOG00000050539	Fbln5	-0.577705	1.23874e-20	2.61777e-19
ENSRNOG00000003256	Ccng1	0.397599	1.2582e-20	2.65567e-19
ENSRNOG00000026504	Fam114a1	-0.825742	1.33133e-20	2.8066e-19
ENSRNOG00000021213	Lix1l	-0.488923	1.37269e-20	2.89029e-19
ENSRNOG00000007033	Sorcs2	-0.507833	1.42909e-20	3.00541e-19
ENSRNOG00000060821	Rnf114	-0.543649	1.45292e-20	3.05184e-19
ENSRNOG00000018944	Pank1	0.835229	1.45575e-20	3.05409e-19
ENSRNOG00000011227	Atp1b2	0.460953	1.58575e-20	3.32282e-19
ENSRNOG00000016119	Fzd7	0.610814	1.63189e-20	3.41539e-19
ENSRNOG00000009949	Pcdh18	-1.00487	1.84324e-20	3.85308e-19
ENSRNOG00000010718	Gpr153	-0.712873	2.05281e-20	4.28602e-19
ENSRNOG00000018517	Trim21	-0.824063	2.2987e-20	4.79365e-19
ENSRNOG00000030515	Nfasc	1.46198	2.31326e-20	4.81824e-19
ENSRNOG00000019147	Stom	0.437137	2.37176e-20	4.93416e-19
ENSRNOG00000024885	Asb10	1.54369	2.45694e-20	5.10528e-19
ENSRNOG00000018087	Vim	-0.231727	2.50797e-20	5.20508e-19
ENSRNOG00000002610	Carhsp1	-0.516357	3.0334e-20	6.28808e-19
ENSRNOG00000011912	Tmem38a	0.363516	3.04553e-20	6.3057e-19
ENSRNOG00000010196	Glb1	-0.557835	3.27655e-20	6.77594e-19
ENSRNOG00000011306	Myod1	0.810384	3.33611e-20	6.89093e-19
ENSRNOG00000010841	Col8a2	-0.737555	3.42028e-20	7.0564e-19
ENSRNOG00000014259	Mycl	0.781547	3.85145e-20	7.93654e-19
ENSRNOG00000017191	Trim30c	-0.578813	3.9078e-20	8.04313e-19
ENSRNOG00000031934	Enah	-0.650156	4.25603e-20	8.74952e-19
ENSRNOG00000020206	Ctsd	0.351317	4.40566e-20	9.04643e-19
ENSRNOG00000009019	Slc6a6	0.603347	5.02853e-20	1.03132e-18
ENSRNOG00000016818	Fgfr3	0.620856	5.09355e-20	1.04343e-18
ENSRNOG00000020407	Atcay	1.97301	5.21205e-20	1.06645e-18
ENSRNOG00000058006	Sncg	0.548147	5.26894e-20	1.07682e-18
ENSRNOG00000019556	Cd9	0.383308	5.38857e-20	1.09998e-18
ENSRNOG00000053562	Arx	1.26947	5.61553e-20	1.14496e-18
ENSRNOG00000019328	Phgdh	0.712401	6.21335e-20	1.26537e-18
ENSRNOG00000053384	Bmp7	0.901793	6.34443e-20	1.29055e-18
ENSRNOG00000008103	Mdh1	0.400589	7.14481e-20	1.45167e-18
ENSRNOG00000020300	Lsp1	-0.472426	7.22075e-20	1.46538e-18
ENSRNOG00000006931	Eepd1	0.673294	7.47491e-20	1.51519e-18
ENSRNOG00000003078	Dcaf6	0.459224	8.59199e-20	1.7396e-18
ENSRNOG00000051952	Tes	-0.568636	8.8506e-20	1.78988e-18
ENSRNOG00000003772	Csrp2	-0.631626	8.98452e-20	1.81485e-18
ENSRNOG00000059116	Cux1	0.638808	9.2706e-20	1.87047e-18
ENSRNOG00000005770	Sostdc1	0.724413	9.32959e-20	1.88019e-18
ENSRNOG00000000853	Aif1	-0.6347	9.81022e-20	1.97476e-18
ENSRNOG00000026053	Grem1	-1.0518	9.84794e-20	1.98006e-18
ENSRNOG00000021166	Ecm1	-0.413882	1.04448e-19	2.09765e-18
ENSRNOG00000024128	Aco2	0.333396	1.10595e-19	2.21854e-18
ENSRNOG00000006876	Msx1	0.876429	1.19068e-19	2.38575e-18
ENSRNOG00000017283	Kcnt1	-1.16874	1.21622e-19	2.43412e-18
ENSRNOG00000003063	Phka1	0.61991	1.22238e-19	2.44364e-18
ENSRNOG00000000664	Tpst2	-0.542991	1.271e-19	2.53791e-18
ENSRNOG00000048088	Mest	-1.00508	1.40191e-19	2.7961e-18
ENSRNOG00000059660	AABR07065531.5	-0.551966	1.46768e-19	2.92393e-18
ENSRNOG00000047931	Tmsb4x	-0.246227	1.57157e-19	3.12732e-18
ENSRNOG00000016012	Spats2l	-0.76271	1.7637e-19	3.50564e-18
ENSRNOG00000015157	Smtnl2	0.571209	1.81177e-19	3.59707e-18
ENSRNOG00000057153	Pla1a	-0.951531	1.87422e-19	3.7168e-18
ENSRNOG00000042630	Asb5	-0.804694	2.30725e-19	4.57035e-18
ENSRNOG00000013140	Pdzd2	0.655105	2.39811e-19	4.74493e-18
ENSRNOG00000009446	Rxra	0.491488	2.42453e-19	4.79175e-18
ENSRNOG00000059968	Jak2	-0.492251	2.53712e-19	5.00858e-18
ENSRNOG00000012698	Chsy1	-0.667102	2.60758e-19	5.14184e-18
ENSRNOG00000018566	Ctsl	-0.330639	2.9387e-19	5.7882e-18
ENSRNOG00000006331	Elovl5	0.493283	3.26572e-19	6.42504e-18
ENSRNOG00000043044	Cnn2	-0.703809	3.71621e-19	7.30308e-18
ENSRNOG00000004699	Fibin	-0.750293	3.87808e-19	7.61259e-18
ENSRNOG00000020546	Lipe	0.430291	3.90677e-19	7.66027e-18
ENSRNOG00000001276	Pcnt	0.484759	4.15258e-19	8.13307e-18
ENSRNOG00000021294	Mstn	1.21335	4.46998e-19	8.74488e-18
ENSRNOG00000016064	Tkt	0.351778	4.51388e-19	8.82083e-18
ENSRNOG00000030763	Dpp4	-0.781527	5.00973e-19	9.77881e-18
ENSRNOG00000017248	Prkag3	0.719959	5.31612e-19	1.03652e-17
ENSRNOG00000019965	Tgfb1i1	-0.591407	5.34248e-19	1.0405e-17
ENSRNOG00000051534	AC132720.1	0.848572	5.36268e-19	1.04326e-17
ENSRNOG00000039666	Srpx	-0.511327	5.38824e-19	1.04706e-17
ENSRNOG00000053494	Mcpt1l1	0.522816	5.81259e-19	1.12826e-17
ENSRNOG00000014683	Il1rl2	-0.693519	5.895e-19	1.14299e-17
ENSRNOG00000010466	Chpf2	-0.569536	6.42007e-19	1.24341e-17
ENSRNOG00000000158	Cdo1	0.524714	6.74356e-19	1.30461e-17
ENSRNOG00000019914	Fam57b	0.832483	7.09725e-19	1.3715e-17
ENSRNOG00000018505	Cidea	0.8101	7.57667e-19	1.46252e-17
ENSRNOG00000019810	Des	0.291748	7.58514e-19	1.46254e-17
ENSRNOG00000056656	AABR07044049.1	0.844727	7.9164e-19	1.52472e-17
ENSRNOG00000006663	Usp2	0.726143	8.77252e-19	1.68774e-17
ENSRNOG00000017833	Actn2	-0.411138	8.88526e-19	1.70754e-17
ENSRNOG00000018294	Hspa5	-0.327866	9.65849e-19	1.85409e-17
ENSRNOG00000037853	Rarres1	-0.620874	9.73858e-19	1.8674e-17
ENSRNOG00000003832	Vash2	-0.753534	1.00623e-18	1.92736e-17
novel.931	-	-0.444553	1.01837e-18	1.94845e-17
ENSRNOG00000017078	Selenon	-0.549526	1.04319e-18	1.99375e-17
ENSRNOG00000004084	Fam84a	0.806443	1.15601e-18	2.20695e-17
ENSRNOG00000025843	Ccdc102a	-0.512678	1.2065e-18	2.30082e-17
ENSRNOG00000047781	Slc25a23	1.17203	1.22797e-18	2.3392e-17
ENSRNOG00000023322	Ostc	-0.528176	1.23079e-18	2.34199e-17
ENSRNOG00000003029	Calr	-0.2869	1.26839e-18	2.41092e-17
ENSRNOG00000022800	Sp140	-0.66226	1.27714e-18	2.42489e-17
ENSRNOG00000038957	RGD1305184	-1.99308	1.29182e-18	2.45008e-17
ENSRNOG00000042367	Cyp2ab1	1.49938	1.45825e-18	2.76273e-17
ENSRNOG00000018958	Mt3	0.948343	1.48056e-18	2.80194e-17
novel.743	-	-1.49098	1.53068e-18	2.89365e-17
ENSRNOG00000022242	Cxcl9	-0.619949	1.55061e-18	2.92814e-17
novel.318	-	-1.13869	1.73062e-18	3.26453e-17
ENSRNOG00000007393	Ndrg1	0.357484	1.83183e-18	3.45169e-17
ENSRNOG00000018145	Crat	0.41345	1.92068e-18	3.6152e-17
ENSRNOG00000002460	Serpinb2	-1.306	2.14643e-18	4.03576e-17
ENSRNOG00000013309	Pik3ap1	0.532399	2.40393e-18	4.51504e-17
ENSRNOG00000006435	Tor1b	-0.605522	2.41867e-18	4.5378e-17
ENSRNOG00000009681	Flot2	0.428762	2.64974e-18	4.96598e-17
ENSRNOG00000038955	MGC105567	-1.37416	3.17435e-18	5.94276e-17
ENSRNOG00000019372	Pc	0.582619	3.20712e-18	5.99766e-17
ENSRNOG00000000924	Slc7a1	0.624704	3.21288e-18	6.00198e-17
ENSRNOG00000017528	Gpr157	0.927147	3.33009e-18	6.21425e-17
ENSRNOG00000033929	Stfa2l1	-2.56861	3.46177e-18	6.45306e-17
ENSRNOG00000006384	Ddx58	-1.09578	3.57628e-18	6.65939e-17
ENSRNOG00000026519	LOC100364062	0.888375	3.86029e-18	7.18056e-17
ENSRNOG00000022364	Dsg4	2.01348	3.92856e-18	7.29974e-17
ENSRNOG00000010240	Fam46a	-0.815251	4.02872e-18	7.47786e-17
ENSRNOG00000017484	Gja5	-0.913003	4.46828e-18	8.28489e-17
ENSRNOG00000047545	Adra2a	-0.785374	4.5433e-18	8.41503e-17
ENSRNOG00000006526	Sema3c	-0.556828	4.79167e-18	8.86561e-17
ENSRNOG00000021569	Tiam1	0.667297	5.27774e-18	9.75456e-17
ENSRNOG00000009373	RGD1562690	0.727666	5.67007e-18	1.04686e-16
ENSRNOG00000015086	Plin1	0.428039	5.77543e-18	1.06518e-16
ENSRNOG00000004479	Aurka	0.777579	5.87603e-18	1.08258e-16
ENSRNOG00000053895	B3gnt9	-0.82812	6.00017e-18	1.10429e-16
novel.466	-	-1.32682	6.22917e-18	1.14522e-16
ENSRNOG00000017063	Fcna	-0.771919	6.28065e-18	1.15347e-16
ENSRNOG00000024689	Hopx	0.431258	6.3151e-18	1.15857e-16
ENSRNOG00000011951	Plk2	-0.556403	6.78149e-18	1.24282e-16
ENSRNOG00000021260	Prnd	-1.61468	6.95668e-18	1.27359e-16
ENSRNOG00000012095	Pkia	0.551133	7.12278e-18	1.30262e-16
ENSRNOG00000020238	Plekhh3	0.544544	7.59221e-18	1.38701e-16
ENSRNOG00000002251	Sec31a	-0.40289	7.8257e-18	1.42817e-16
ENSRNOG00000020345	Slc25a42	0.608799	8.68633e-18	1.58357e-16
ENSRNOG00000033940	Adgrl4	-0.533213	9.46499e-18	1.72372e-16
ENSRNOG00000033697	Casp4	-0.787027	1.02978e-17	1.87343e-16
ENSRNOG00000031709	Ppfibp1	-0.380035	1.08853e-17	1.97824e-16
novel.347	-	-0.859091	1.1127e-17	2.02006e-16
ENSRNOG00000000614	Bicc1	-0.609089	1.27535e-17	2.31292e-16
ENSRNOG00000050586	Stfa2l2	-1.64823	1.28096e-17	2.32e-16
ENSRNOG00000017421	Alpk2	1.05418	1.28192e-17	2.32e-16
ENSRNOG00000054251	Clec7a	0.840613	1.3499e-17	2.44048e-16
ENSRNOG00000020837	Cd300lg	1.0479	1.3868e-17	2.50458e-16
ENSRNOG00000000456	Psmb8	-0.665182	1.447e-17	2.61031e-16
ENSRNOG00000016299	Klf4	-0.361925	1.44834e-17	2.61031e-16
ENSRNOG00000030344	Krt31	-2.08662	1.47887e-17	2.66257e-16
ENSRNOG00000013331	Sdha	0.331945	1.53917e-17	2.76828e-16
ENSRNOG00000009886	Fkbp14	-0.771031	1.56217e-17	2.80674e-16
ENSRNOG00000031163	Nfkbiz	-0.616367	1.63484e-17	2.93428e-16
ENSRNOG00000015957	F13a1	-0.817149	1.73226e-17	3.10592e-16
ENSRNOG00000000302	Sesn1	0.563936	1.81576e-17	3.25229e-16
ENSRNOG00000024259	Tmem54	1.19918	2.0066e-17	3.5904e-16
ENSRNOG00000050828	Vkorc1	-0.565551	2.04911e-17	3.6627e-16
ENSRNOG00000023993	Kif1a	1.35849	2.06265e-17	3.68312e-16
ENSRNOG00000005390	Nup210	0.839508	2.20568e-17	3.93449e-16
ENSRNOG00000018101	Klc3	1.04287	2.25147e-17	4.01205e-16
ENSRNOG00000017120	Abhd2	0.661806	2.28516e-17	4.06791e-16
ENSRNOG00000012480	Pxylp1	-0.703578	2.54264e-17	4.52164e-16
ENSRNOG00000029698	Pim3	0.461187	2.68566e-17	4.77109e-16
ENSRNOG00000004359	Wars	-0.507608	2.70414e-17	4.79902e-16
ENSRNOG00000006375	Vdac1	0.379532	3.12607e-17	5.54216e-16
ENSRNOG00000020889	Nucb1	-0.313901	3.24144e-17	5.74084e-16
ENSRNOG00000003228	Mid1ip1	0.412754	3.44674e-17	6.09823e-16
ENSRNOG00000019491	Stard10	0.631647	3.62544e-17	6.40788e-16
ENSRNOG00000014371	Cdh13	-0.326957	3.70523e-17	6.54228e-16
ENSRNOG00000059579	Gpt2	0.603493	3.82851e-17	6.75309e-16
ENSRNOG00000036693	Slc25a10	0.632966	4.23915e-17	7.46984e-16
ENSRNOG00000000459	Psmb9	-0.552119	4.30633e-17	7.58054e-16
ENSRNOG00000001520	Dlx1	1.53336	4.44509e-17	7.81689e-16
ENSRNOG00000017159	Dsc3	0.435789	5.38256e-17	9.4559e-16
ENSRNOG00000057322	Efna3	0.846556	5.41007e-17	9.49465e-16
ENSRNOG00000011989	Vat1l	1.98902	5.56208e-17	9.75159e-16
ENSRNOG00000000571	Psap	0.249851	6.22075e-17	1.08954e-15
ENSRNOG00000004854	Has2	-1.06256	7.16888e-17	1.25434e-15
ENSRNOG00000013463	Kcnj8	-0.80266	8.02296e-17	1.40236e-15
ENSRNOG00000013928	Dsp	0.329324	8.88191e-17	1.55095e-15
ENSRNOG00000008765	Zfhx4	-0.973774	9.09965e-17	1.58737e-15
ENSRNOG00000010668	Anxa6	-0.287188	9.19119e-17	1.60174e-15
ENSRNOG00000010617	Scube1	1.19737	9.28591e-17	1.61662e-15
ENSRNOG00000012811	Spint1	0.910967	9.5147e-17	1.6548e-15
ENSRNOG00000057710	Ccnd2	0.584184	9.71658e-17	1.68822e-15
ENSRNOG00000013167	Hmgb2l1	0.476329	9.80428e-17	1.70176e-15
ENSRNOG00000024115	C6	-0.796834	1.03942e-16	1.80235e-15
ENSRNOG00000024349	Cbarp	0.746679	1.09996e-16	1.90543e-15
novel.160	-	-0.694054	1.1874e-16	2.05485e-15
ENSRNOG00000001519	Dlx2	1.32179	1.23752e-16	2.13945e-15
ENSRNOG00000014710	Prom2	0.716033	1.26084e-16	2.17761e-15
ENSRNOG00000004172	Pdk2	0.666203	1.28029e-16	2.20901e-15
ENSRNOG00000007657	Col27a1	-0.548828	1.33497e-16	2.30107e-15
ENSRNOG00000010461	Gpx8	-0.718816	1.41526e-16	2.43706e-15
ENSRNOG00000024294	AABR07019083.1	0.431055	1.41842e-16	2.44008e-15
ENSRNOG00000037113	Slfn2	-0.391182	1.44142e-16	2.4772e-15
ENSRNOG00000008639	Pabpc1	-0.314695	1.48569e-16	2.55075e-15
ENSRNOG00000021256	Adra1d	-1.19215	1.53722e-16	2.63663e-15
ENSRNOG00000020867	Numbl	-0.441477	1.55574e-16	2.66576e-15
ENSRNOG00000011361	Slc37a4	0.519911	1.58677e-16	2.71625e-15
ENSRNOG00000011313	Sorcs1	2.0062	1.79794e-16	3.07471e-15
ENSRNOG00000009154	Hmx1	-2.01664	1.89549e-16	3.23835e-15
ENSRNOG00000007763	Plod1	-0.377612	1.95018e-16	3.32852e-15
ENSRNOG00000030639	Usp13	0.456411	2.00305e-16	3.41539e-15
ENSRNOG00000005246	Tfap2c	0.65328	2.09032e-16	3.5607e-15
ENSRNOG00000011141	Serpina11	1.51913	2.11206e-16	3.59423e-15
ENSRNOG00000052025	Aes	0.426476	2.25003e-16	3.82527e-15
ENSRNOG00000030264	Fam83h	0.576562	2.34272e-16	3.97896e-15
ENSRNOG00000013552	Scd	0.335591	2.3841e-16	4.0453e-15
ENSRNOG00000014375	Adgrb2	0.700935	2.4174e-16	4.0978e-15
ENSRNOG00000058186	Errfi1	-0.30672	2.62393e-16	4.44356e-15
ENSRNOG00000056728	G6pd	0.422454	2.84942e-16	4.82073e-15
ENSRNOG00000011823	Tfap2b	0.728798	2.94659e-16	4.98028e-15
ENSRNOG00000006110	Jph1	0.483072	3.19853e-16	5.40086e-15
ENSRNOG00000047741	E2f2	0.826135	3.2119e-16	5.41817e-15
ENSRNOG00000018651	Agtpbp1	0.616497	3.32629e-16	5.60571e-15
ENSRNOG00000002840	Atp5b	0.221977	3.35655e-16	5.65122e-15
ENSRNOG00000055450	Ckmt2	1.20885	3.64139e-16	6.12486e-15
ENSRNOG00000049870	-	-2.80485	3.68157e-16	6.18646e-15
ENSRNOG00000004029	Nectin4	0.921616	3.71148e-16	6.23053e-15
ENSRNOG00000020948	Pth1r	-0.69954	3.71496e-16	6.23053e-15
ENSRNOG00000007364	Rab15	0.622272	3.79485e-16	6.35839e-15
novel.375	-	-1.85332	3.81703e-16	6.38939e-15
ENSRNOG00000011142	Cyb5b	0.486104	3.83145e-16	6.40736e-15
ENSRNOG00000021441	Reln	0.753953	3.83921e-16	6.41418e-15
ENSRNOG00000046472	Arfgap3	-0.562387	4.34491e-16	7.25209e-15
ENSRNOG00000018241	Ank1	0.533926	4.40689e-16	7.34848e-15
ENSRNOG00000014029	Klhl13	-0.807696	4.50684e-16	7.50794e-15
ENSRNOG00000018487	Slc3a2	0.363633	4.84356e-16	8.06117e-15
ENSRNOG00000042905	RT1-T24-4	-0.565754	4.90125e-16	8.14939e-15
ENSRNOG00000022777	Six1	0.629749	4.96894e-16	8.25404e-15
ENSRNOG00000019445	Msln	-1.02708	5.00925e-16	8.31307e-15
ENSRNOG00000006302	Gclc	0.593447	5.03554e-16	8.34873e-15
ENSRNOG00000017354	Zyx	-0.328711	5.15337e-16	8.53594e-15
ENSRNOG00000016770	Calm2	0.371119	5.23705e-16	8.6663e-15
ENSRNOG00000034190	-	-0.433432	5.49683e-16	9.08754e-15
ENSRNOG00000002753	Adam11	0.911993	5.55902e-16	9.18163e-15
ENSRNOG00000033134	Mef2c	-0.421649	6.59661e-16	1.0885e-14
ENSRNOG00000004063	Sh3pxd2b	-0.687867	6.6087e-16	1.08946e-14
ENSRNOG00000059903	Thbs3	-0.516627	6.94378e-16	1.14362e-14
ENSRNOG00000054371	Prkcg	-0.988485	6.98026e-16	1.14854e-14
ENSRNOG00000022540	Trex1	-0.63549	7.34058e-16	1.20669e-14
ENSRNOG00000057078	Ddit4	0.394447	8.69547e-16	1.42806e-14
ENSRNOG00000033280	Pam	-0.307714	8.76132e-16	1.43752e-14
ENSRNOG00000055471	Ywhah	-0.343744	9.18335e-16	1.50534e-14
ENSRNOG00000016112	Cd274	-1.17017	9.41651e-16	1.54211e-14
ENSRNOG00000032951	Jsrp1	0.427337	1.04454e-15	1.70754e-14
ENSRNOG00000018836	RGD1559896	-0.37297	1.04463e-15	1.70754e-14
ENSRNOG00000003984	Apln	-0.943267	1.09704e-15	1.79152e-14
ENSRNOG00000006934	Acvr1b	0.47067	1.10553e-15	1.80369e-14
ENSRNOG00000008196	Parp12	-0.731709	1.15902e-15	1.88919e-14
ENSRNOG00000007907	Tmem178a	-0.662924	1.21296e-15	1.97527e-14
ENSRNOG00000013948	Zc3hav1	-0.499674	1.26214e-15	2.05342e-14
ENSRNOG00000002578	Serpinb3a	-1.42747	1.32047e-15	2.14633e-14
ENSRNOG00000000795	RT1-N3	-0.677772	1.32628e-15	2.15374e-14
ENSRNOG00000019981	Sdf4	-0.383579	1.35084e-15	2.19159e-14
novel.1173	-	-1.09552	1.41127e-15	2.28749e-14
ENSRNOG00000004141	Vasn	-0.514517	1.46163e-15	2.36691e-14
ENSRNOG00000008697	Nov	-0.445306	1.49091e-15	2.41209e-14
ENSRNOG00000050869	Cebpd	0.452689	1.554e-15	2.51182e-14
ENSRNOG00000015971	Slc12a2	0.420689	1.56614e-15	2.5291e-14
ENSRNOG00000021079	Fxyd1	0.378035	1.68383e-15	2.71662e-14
ENSRNOG00000019926	Ramp1	0.563959	1.72558e-15	2.77921e-14
ENSRNOG00000004361	Parp10	-0.593513	1.72582e-15	2.77921e-14
ENSRNOG00000042471	RGD1560324	0.940597	1.80954e-15	2.91133e-14
ENSRNOG00000017469	Anxa1	-0.306809	1.82088e-15	2.92687e-14
ENSRNOG00000007726	Mcam	-0.304631	1.85329e-15	2.97622e-14
ENSRNOG00000024568	Ndufs7	0.425396	1.90927e-15	3.06329e-14
ENSRNOG00000004834	Llgl2	0.721506	1.91474e-15	3.06923e-14
ENSRNOG00000017212	Spsb1	-0.474703	1.99716e-15	3.19839e-14
ENSRNOG00000017672	Akr1c14	-0.666605	2.00386e-15	3.20618e-14
ENSRNOG00000014678	Fzd5	1.08634	2.00881e-15	3.21114e-14
ENSRNOG00000029886	Hba-a2	0.287191	2.14014e-15	3.41794e-14
ENSRNOG00000019336	Gata3	0.811072	2.18506e-15	3.48647e-14
ENSRNOG00000012820	Add3	-0.409982	2.41413e-15	3.84845e-14
ENSRNOG00000002419	Plp1	0.773258	2.43752e-15	3.88217e-14
ENSRNOG00000017983	Ubac1	0.431996	2.49904e-15	3.97651e-14
ENSRNOG00000048961	Bhlhe41	0.743558	2.54819e-15	4.05102e-14
ENSRNOG00000000557	Ppa1	-0.292421	2.57543e-15	4.09059e-14
ENSRNOG00000011346	Ehd2	-0.291565	2.59831e-15	4.12316e-14
ENSRNOG00000008182	Htra3	-0.341355	2.74063e-15	4.34504e-14
ENSRNOG00000050277	Uckl1	0.53924	3.15308e-15	4.99439e-14
ENSRNOG00000006444	Fkbp4	0.376394	3.17183e-15	5.01951e-14
ENSRNOG00000007404	Svbp	-0.665828	3.35053e-15	5.2975e-14
ENSRNOG00000010210	Slc7a11	0.862295	3.40849e-15	5.38423e-14
ENSRNOG00000034015	Capn2	-0.309285	3.469e-15	5.47485e-14
ENSRNOG00000012622	Mmp15	0.373629	3.7111e-15	5.85163e-14
ENSRNOG00000017525	Epha1	0.778992	3.73704e-15	5.8872e-14
ENSRNOG00000005641	Fbxl4	0.893145	4.39871e-15	6.92329e-14
ENSRNOG00000018715	Clec10a	-0.456372	4.42578e-15	6.9596e-14
ENSRNOG00000048440	RGD1561998	0.713516	4.84426e-15	7.61079e-14
ENSRNOG00000026910	Gjb4	0.874293	4.85453e-15	7.62004e-14
ENSRNOG00000000768	Ubd	-0.870911	5.11105e-15	8.01435e-14
ENSRNOG00000004972	Upp1	-0.664454	5.11495e-15	8.01435e-14
ENSRNOG00000030726	Asgr2	-0.728789	5.20162e-15	8.1428e-14
ENSRNOG00000048043	F2r	-0.494211	5.40137e-15	8.4479e-14
ENSRNOG00000012640	Dpp7	-0.349398	5.58549e-15	8.72802e-14
ENSRNOG00000020779	Kcna7	0.629062	5.60748e-15	8.75346e-14
ENSRNOG00000001072	Cers4	0.694952	5.61184e-15	8.75346e-14
ENSRNOG00000010697	Hadh	0.542434	5.66712e-15	8.83177e-14
ENSRNOG00000010204	Tmem9	-0.524721	6.42693e-15	1.00069e-13
ENSRNOG00000047686	Pou3f1	0.610657	6.94878e-15	1.08098e-13
ENSRNOG00000019278	Fsd2	0.875901	6.95904e-15	1.0816e-13
ENSRNOG00000020843	LOC100360087	0.266938	6.98218e-15	1.08423e-13
ENSRNOG00000028566	Pld4	-0.434892	7.43472e-15	1.15348e-13
ENSRNOG00000021128	Kcnj11	0.514869	7.58893e-15	1.17635e-13
ENSRNOG00000030170	Krt10	-0.492121	7.75826e-15	1.20153e-13
ENSRNOG00000008680	Loxl1	-0.630087	8.46212e-15	1.30937e-13
ENSRNOG00000004936	Sdc2	-0.430506	9.38486e-15	1.45086e-13
ENSRNOG00000011518	Dusp26	0.88733	9.55951e-15	1.47655e-13
ENSRNOG00000053675	Dhh	0.849506	9.64915e-15	1.48907e-13
novel.829	-	1.37773	1.11759e-14	1.72315e-13
ENSRNOG00000006542	Atp6v0c	0.29772	1.13058e-14	1.74164e-13
ENSRNOG00000016538	Itga8	-0.796029	1.15071e-14	1.77107e-13
ENSRNOG00000021475	Ldah	0.598733	1.15782e-14	1.78044e-13
ENSRNOG00000000532	Cmtr1	-0.419958	1.32528e-14	2.03615e-13
ENSRNOG00000057620	Slc6a8	0.415791	1.3364e-14	2.05142e-13
ENSRNOG00000005975	LOC100362027	-0.362079	1.34678e-14	2.06554e-13
ENSRNOG00000020636	Spint2	0.414362	1.55462e-14	2.38219e-13
ENSRNOG00000009222	Epha2	0.485079	1.55705e-14	2.38383e-13
ENSRNOG00000016752	Crispld2	-0.368359	1.5655e-14	2.39465e-13
ENSRNOG00000046660	Gpc6	-1.39523	1.58303e-14	2.41934e-13
ENSRNOG00000008400	Pml	-0.606369	1.6447e-14	2.51138e-13
ENSRNOG00000014034	Olfml2a	-0.486892	1.71259e-14	2.61276e-13
ENSRNOG00000011305	Sox10	0.598878	1.80265e-14	2.74773e-13
ENSRNOG00000014387	Chac1	1.29571	1.88907e-14	2.87694e-13
ENSRNOG00000005621	Gxylt2	-0.877252	1.94743e-14	2.96324e-13
ENSRNOG00000045560	LOC499229	-1.05249	2.10106e-14	3.1942e-13
ENSRNOG00000003150	Mpc2	0.462339	2.10455e-14	3.19671e-13
ENSRNOG00000021285	Celsr1	0.713099	2.12208e-14	3.22053e-13
ENSRNOG00000015948	Slc1a5	0.407035	2.21078e-14	3.35221e-13
ENSRNOG00000054140	Myl6	-0.250917	2.25053e-14	3.40951e-13
ENSRNOG00000050241	AABR07010747.1	0.814528	2.37842e-14	3.60012e-13
ENSRNOG00000061147	Fam189a2	0.791592	2.52809e-14	3.82336e-13
ENSRNOG00000019999	Lypd3	0.525466	2.55272e-14	3.85725e-13
ENSRNOG00000036680	Notum	1.55549	2.66326e-14	4.02078e-13
ENSRNOG00000012630	Rhoc	-0.34099	2.73881e-14	4.13126e-13
ENSRNOG00000027491	Vldlr	-0.649735	2.78469e-14	4.19682e-13
ENSRNOG00000009450	Hcn4	2.28766	2.90458e-14	4.37371e-13
ENSRNOG00000019110	Ocstamp	1.28276	3.14836e-14	4.7367e-13
ENSRNOG00000055721	Rnf128	1.0183	3.22238e-14	4.84387e-13
ENSRNOG00000015727	Loxl4	-0.938527	3.33587e-14	5.01014e-13
ENSRNOG00000008668	Vsig8	1.25735	3.44521e-14	5.1699e-13
ENSRNOG00000025350	Ppp1r13l	0.504442	3.46239e-14	5.1912e-13
ENSRNOG00000030467	Ube2l6	-0.704607	3.57461e-14	5.35484e-13
ENSRNOG00000008921	Dynll2	0.411647	3.73867e-14	5.59578e-13
ENSRNOG00000009381	Mapk6	-0.39584	3.75959e-14	5.62225e-13
ENSRNOG00000001270	Hvcn1	0.974872	3.7854e-14	5.65598e-13
ENSRNOG00000007000	Grhl2	0.866906	3.88246e-14	5.79603e-13
ENSRNOG00000018553	Pitpnm1	-0.385888	3.89582e-14	5.81099e-13
ENSRNOG00000048924	Islr	-0.462552	4.07623e-14	6.07487e-13
ENSRNOG00000001143	Cit	-0.700041	4.10796e-14	6.11693e-13
ENSRNOG00000009683	Sdcbp	-0.318188	4.16544e-14	6.19721e-13
ENSRNOG00000017940	Rere	0.293962	4.37416e-14	6.50218e-13
ENSRNOG00000005608	Tead4	-0.591476	4.37939e-14	6.50438e-13
ENSRNOG00000009928	Bckdhb	0.518076	4.46098e-14	6.61991e-13
ENSRNOG00000004303	Timp3	0.329277	4.49458e-14	6.66408e-13
ENSRNOG00000008555	Rps20	-0.289028	4.75791e-14	7.04852e-13
ENSRNOG00000013925	Nox4	-1.11023	4.8974e-14	7.24899e-13
ENSRNOG00000028436	Rprml	1.19957	5.06262e-14	7.48717e-13
ENSRNOG00000038883	LOC294154	0.258944	5.221e-14	7.70908e-13
ENSRNOG00000003105	Kif19	1.36157	5.22154e-14	7.70908e-13
ENSRNOG00000011148	Ssr3	-0.48707	5.22746e-14	7.71128e-13
ENSRNOG00000015830	Ano9	1.15368	5.28555e-14	7.79037e-13
ENSRNOG00000042556	Bmyc	0.662777	5.37795e-14	7.91985e-13
ENSRNOG00000015152	Pkp3	0.459107	5.84694e-14	8.60321e-13
ENSRNOG00000003242	Gulp1	-0.695623	5.89343e-14	8.66429e-13
ENSRNOG00000007862	Acat1	0.389683	5.9499e-14	8.73992e-13
ENSRNOG00000030285	Epha3	-0.861673	5.97213e-14	8.76517e-13
novel.454	-	0.43729	6.03866e-14	8.85535e-13
ENSRNOG00000017489	Gse1	0.507741	6.0864e-14	8.91783e-13
ENSRNOG00000036603	Ifit1bl	-1.53792	6.2459e-14	9.14383e-13
ENSRNOG00000014237	Zfp503	0.465963	6.39336e-14	9.35183e-13
ENSRNOG00000001030	Tsc22d1	-0.261344	6.51044e-14	9.51508e-13
ENSRNOG00000018859	Pik3ip1	0.465696	6.52724e-14	9.53164e-13
ENSRNOG00000054561	Isg20	-0.898781	6.99715e-14	1.02093e-12
ENSRNOG00000020431	Matk	0.676824	7.1136e-14	1.03705e-12
ENSRNOG00000023520	Cs	0.361001	7.14306e-14	1.04047e-12
ENSRNOG00000010170	Tubb4b	0.354053	7.39172e-14	1.07579e-12
ENSRNOG00000016488	Pltp	-0.342579	7.40508e-14	1.0765e-12
ENSRNOG00000015618	Wnt5a	-0.537502	7.40897e-14	1.0765e-12
ENSRNOG00000052190	AABR07072602.1	-1.69684	7.53896e-14	1.09447e-12
ENSRNOG00000025155	Lmtk2	0.509259	8.1436e-14	1.18054e-12
ENSRNOG00000016827	Slc38a3	1.07326	8.14539e-14	1.18054e-12
ENSRNOG00000019940	Ssr2	-0.39978	8.48925e-14	1.22935e-12
ENSRNOG00000020991	Ms4a6a	-0.726221	8.61858e-14	1.24704e-12
ENSRNOG00000055257	2019-09-15	-0.273563	9.0685e-14	1.31105e-12
ENSRNOG00000010940	Acad11	0.671554	9.09836e-14	1.31428e-12
ENSRNOG00000004749	Slc30a1	0.563802	9.30634e-14	1.3432e-12
ENSRNOG00000048302	LOC100910979	-1.585	9.62786e-14	1.38846e-12
ENSRNOG00000019205	Gnpat	0.536149	9.85299e-14	1.41975e-12
ENSRNOG00000023614	Hsh2d	-0.889922	9.92081e-14	1.42833e-12
novel.136	-	0.774359	1.00955e-13	1.45229e-12
ENSRNOG00000028335	Fat4	-0.817946	1.08874e-13	1.5649e-12
ENSRNOG00000006228	Pdia4	-0.42733	1.1459e-13	1.6457e-12
ENSRNOG00000010691	Cmtm3	-0.574952	1.15995e-13	1.66451e-12
ENSRNOG00000020460	Banf1	0.356714	1.23436e-13	1.76982e-12
ENSRNOG00000005809	Arhgdib	-0.379152	1.24729e-13	1.7869e-12
ENSRNOG00000012008	S100a3	0.971877	1.26312e-13	1.80808e-12
ENSRNOG00000003613	Mid1	-0.772263	1.29393e-13	1.85066e-12
ENSRNOG00000025889	Gnas	-0.925852	1.29908e-13	1.8565e-12
ENSRNOG00000042612	Rnase12	1.10603	1.32236e-13	1.88822e-12
ENSRNOG00000016692	Hsdl2	0.47078	1.33238e-13	1.90096e-12
ENSRNOG00000009466	Unc45b	0.457349	1.39146e-13	1.98362e-12
ENSRNOG00000049402	Nbl1	-0.311999	1.43952e-13	2.05047e-12
ENSRNOG00000024818	Eva1b	-0.483124	1.48735e-13	2.11686e-12
ENSRNOG00000009722	Chd3	-0.303475	1.53126e-13	2.17757e-12
ENSRNOG00000033433	Csrnp1	-0.615711	1.53355e-13	2.17905e-12
ENSRNOG00000016117	Myof	-0.297595	1.67633e-13	2.37998e-12
ENSRNOG00000004706	Vit	1.94844	1.78179e-13	2.52765e-12
ENSRNOG00000012989	Serinc2	0.59481	1.80444e-13	2.55768e-12
ENSRNOG00000027784	Tsku	-0.494141	1.86991e-13	2.64833e-12
ENSRNOG00000048771	RGD1559482	0.534347	1.87651e-13	2.65551e-12
ENSRNOG00000037030	Aadacl4	0.700017	1.90222e-13	2.68971e-12
ENSRNOG00000022772	Prickle1	-0.564058	1.9577e-13	2.7659e-12
ENSRNOG00000002303	Kcnj12	0.600782	1.96076e-13	2.76798e-12
ENSRNOG00000010524	Cryab	0.347948	1.98509e-13	2.80005e-12
novel.963	-	-1.53974	1.99278e-13	2.80863e-12
ENSRNOG00000007457	Serping1	-0.25036	2.00183e-13	2.8191e-12
ENSRNOG00000006247	Copa	-0.304242	2.01281e-13	2.83226e-12
ENSRNOG00000039754	Rab7b	0.56564	2.01871e-13	2.83711e-12
ENSRNOG00000005269	Srl	0.335019	2.01952e-13	2.83711e-12
ENSRNOG00000036728	Cd300lb	0.917079	2.114e-13	2.96745e-12
ENSRNOG00000006865	Laptm4a	-0.266711	2.16943e-13	3.0428e-12
ENSRNOG00000012378	Dbnl	-0.390173	2.36707e-13	3.31733e-12
ENSRNOG00000021063	Grin2d	-0.716916	2.38974e-13	3.3464e-12
ENSRNOG00000048723	Pros1	-0.535347	2.53644e-13	3.54897e-12
ENSRNOG00000016062	Snta1	0.432999	2.54577e-13	3.55916e-12
ENSRNOG00000016374	Fgfr2	0.425236	2.57029e-13	3.59056e-12
ENSRNOG00000047276	-	0.747277	2.66721e-13	3.72296e-12
ENSRNOG00000011016	Slc7a2	0.635251	2.90492e-13	4.05152e-12
ENSRNOG00000010771	Pkd1	-0.284502	2.93939e-13	4.0963e-12
ENSRNOG00000016512	Sema3b	0.405613	2.98814e-13	4.16091e-12
ENSRNOG00000043866	AY172581.24	-0.600844	3.00131e-13	4.1759e-12
ENSRNOG00000020822	Atp8b2	-0.413736	3.12876e-13	4.34975e-12
ENSRNOG00000014856	Etnk1	-0.364362	3.20621e-13	4.45387e-12
ENSRNOG00000059500	Cdkn1c	-0.481115	3.21112e-13	4.45713e-12
ENSRNOG00000005587	Suclg1	0.346692	3.42432e-13	4.74926e-12
ENSRNOG00000028017	Tmem109	0.302608	3.50145e-13	4.85237e-12
ENSRNOG00000009037	Sulf1	-0.479809	3.57442e-13	4.94954e-12
ENSRNOG00000026963	Hsp90b1	-0.321348	3.71363e-13	5.13823e-12
ENSRNOG00000038916	Dram1	-0.628018	3.8287e-13	5.29322e-12
ENSRNOG00000014165	Ssr1	-0.432195	3.89435e-13	5.37971e-12
ENSRNOG00000019851	Cox6a2	0.368383	3.95602e-13	5.46057e-12
ENSRNOG00000009862	Olfm1	-0.727657	3.99094e-13	5.5044e-12
ENSRNOG00000004645	Galnt5	-1.05122	4.27123e-13	5.88631e-12
ENSRNOG00000004672	Sec14l2	0.60155	4.31311e-13	5.93932e-12
ENSRNOG00000023943	Gbp1	-0.872599	4.33904e-13	5.9703e-12
ENSRNOG00000024429	Peg12	-1.32186	4.47316e-13	6.14998e-12
ENSRNOG00000006539	Pex16	0.559651	4.60199e-13	6.3221e-12
ENSRNOG00000061910	Igfbp3	-0.383137	4.62593e-13	6.34997e-12
ENSRNOG00000010257	Cuedc1	0.442041	4.65877e-13	6.39e-12
ENSRNOG00000061304	Atp2b3	1.1991	4.79184e-13	6.56734e-12
ENSRNOG00000020339	Neurl1	0.514386	4.80946e-13	6.5863e-12
ENSRNOG00000038761	Hacd2	0.561608	4.94988e-13	6.77327e-12
ENSRNOG00000002907	Plekha6	0.588234	5.07775e-13	6.94279e-12
ENSRNOG00000016573	Dgat2	0.586368	5.13407e-13	7.01427e-12
ENSRNOG00000025587	Plagl1	-0.693552	5.52769e-13	7.54612e-12
ENSRNOG00000019440	Kcnn4	0.553394	5.84681e-13	7.97551e-12
novel.91	-	-0.473279	6.4271e-13	8.76019e-12
ENSRNOG00000014522	Mlycd	0.461181	6.46137e-13	8.80001e-12
ENSRNOG00000023910	Man2b1	-0.315409	6.54601e-13	8.90831e-12
ENSRNOG00000027552	Tapbpl	-0.511485	6.5996e-13	8.97422e-12
ENSRNOG00000029205	Zfp354c	-0.702411	6.61604e-13	8.98955e-12
ENSRNOG00000018735	Cd74	-0.244915	6.76772e-13	9.18847e-12
ENSRNOG00000006776	Smyd1	0.49872	6.77514e-13	9.19135e-12
ENSRNOG00000032297	Msmo1	0.549545	6.82033e-13	9.24398e-12
ENSRNOG00000015736	Dhrs3	0.484629	6.82456e-13	9.24398e-12
ENSRNOG00000008065	Wwc1	0.897965	6.85554e-13	9.27872e-12
ENSRNOG00000007943	Gsdma	1.30315	7.10661e-13	9.61105e-12
ENSRNOG00000007367	2019-09-04	-0.562396	7.52965e-13	1.01753e-11
ENSRNOG00000014258	Rab32	-0.728613	7.63018e-13	1.03031e-11
ENSRNOG00000020678	Ifi35	-0.637421	7.77567e-13	1.04914e-11
ENSRNOG00000000436	Egfl8	0.554761	7.99974e-13	1.07854e-11
ENSRNOG00000033609	Irx1	0.558814	8.32758e-13	1.12187e-11
ENSRNOG00000026236	Morc3	-0.424377	8.4313e-13	1.13496e-11
ENSRNOG00000008656	Snca	1.53511	8.4462e-13	1.13609e-11
ENSRNOG00000018044	Phyh	0.446085	8.52381e-13	1.14564e-11
ENSRNOG00000010626	Sphk1	-0.68172	8.56383e-13	1.15013e-11
ENSRNOG00000019194	Pitx3	0.822062	8.89619e-13	1.19385e-11
ENSRNOG00000020995	Fut1	0.899877	8.90432e-13	1.19402e-11
ENSRNOG00000001964	Cd47	-0.441011	9.06646e-13	1.21482e-11
ENSRNOG00000054957	Sfrp4	-0.276767	9.07386e-13	1.21488e-11
ENSRNOG00000003815	Slc25a11	0.369396	9.21897e-13	1.23336e-11
ENSRNOG00000016265	Acsl5	0.36589	1.00651e-12	1.34552e-11
ENSRNOG00000019418	Lrrc4b	1.385	1.0219e-12	1.3645e-11
ENSRNOG00000018645	Rpsa	-0.219436	1.02228e-12	1.3645e-11
ENSRNOG00000056836	Cav1	-0.238634	1.04791e-12	1.39764e-11
ENSRNOG00000052549	Chga	2.00069	1.06444e-12	1.4186e-11
ENSRNOG00000032703	Rasgrp3	0.517486	1.07235e-12	1.42805e-11
ENSRNOG00000013313	Nceh1	-0.677097	1.13721e-12	1.51327e-11
ENSRNOG00000007728	Gsdmd	-0.572703	1.15532e-12	1.53619e-11
ENSRNOG00000005971	Gpr176	-0.685823	1.16592e-12	1.5491e-11
ENSRNOG00000014369	Slc27a4	0.403339	1.17564e-12	1.56082e-11
ENSRNOG00000020032	Impdh1	-0.352036	1.23688e-12	1.64087e-11
ENSRNOG00000020982	LOC687780	-0.225832	1.26586e-12	1.67803e-11
ENSRNOG00000003583	Smyd2	0.38355	1.39202e-12	1.84387e-11
ENSRNOG00000008056	Ankrd9	0.522794	1.40111e-12	1.8545e-11
ENSRNOG00000011927	Sdc3	0.447029	1.56361e-12	2.06801e-11
ENSRNOG00000033772	Serpinb9	-0.629584	1.5665e-12	2.07025e-11
ENSRNOG00000008425	Nav1	-0.430886	1.57706e-12	2.08264e-11
ENSRNOG00000017188	Cyp27a1	-0.531859	1.59134e-12	2.0999e-11
ENSRNOG00000000414	Cep85l	0.854313	1.59511e-12	2.10327e-11
ENSRNOG00000009345	Ugt8	1.35061	1.61092e-12	2.12251e-11
ENSRNOG00000007584	Ehd4	-0.344908	1.64372e-12	2.16409e-11
ENSRNOG00000018297	Ocln	0.910203	1.64923e-12	2.1697e-11
ENSRNOG00000007102	Acss1	0.549571	1.68395e-12	2.21371e-11
ENSRNOG00000004196	Rps29	-0.347358	1.686e-12	2.21473e-11
ENSRNOG00000011157	Jak1	-0.322384	1.76249e-12	2.31346e-11
ENSRNOG00000053086	Selenop	-0.35654	1.81562e-12	2.38139e-11
ENSRNOG00000001295	S100b	0.567598	1.84884e-12	2.42313e-11
ENSRNOG00000015713	Parva	-0.374923	1.94977e-12	2.55349e-11
ENSRNOG00000010011	Osbpl3	0.652073	1.99745e-12	2.61396e-11
ENSRNOG00000047505	Tubb4a	1.8057	2.02716e-12	2.65086e-11
ENSRNOG00000007400	Srebf2	0.340367	2.05186e-12	2.68114e-11
ENSRNOG00000007177	Kdelc2	-0.439427	2.05973e-12	2.6894e-11
ENSRNOG00000019390	Klhl40	0.42138	2.07903e-12	2.71256e-11
ENSRNOG00000021082	Kdelr1	-0.315554	2.09369e-12	2.72965e-11
ENSRNOG00000049633	Flvcr1	0.780922	2.10833e-12	2.74667e-11
ENSRNOG00000003773	Hmox2	-0.451456	2.1508e-12	2.79991e-11
ENSRNOG00000008911	Draxin	-1.51831	2.15963e-12	2.80929e-11
ENSRNOG00000022697	Clec14a	-0.451591	2.20265e-12	2.86311e-11
ENSRNOG00000039698	Prss22	1.31369	2.2365e-12	2.90495e-11
ENSRNOG00000046377	Btnl9	0.590435	2.35074e-12	3.05105e-11
ENSRNOG00000037814	Cxcl17	-2.04802	2.38877e-12	3.0981e-11
ENSRNOG00000038784	Piezo2	-0.9363	2.44007e-12	3.16227e-11
ENSRNOG00000001578	Hoxd4	0.564451	2.48118e-12	3.21315e-11
ENSRNOG00000017832	Snx2	-0.425237	2.5208e-12	3.26062e-11
ENSRNOG00000000451	RT1-Ba	-0.683386	2.52158e-12	3.26062e-11
ENSRNOG00000057626	Kif1b	0.23442	2.54316e-12	3.28608e-11
ENSRNOG00000017765	Net1	0.293599	2.55737e-12	3.30199e-11
ENSRNOG00000013970	Cdt1	0.920405	2.56061e-12	3.30372e-11
ENSRNOG00000048411	Uhrf1	0.69243	2.57599e-12	3.3211e-11
ENSRNOG00000033153	Sfn	0.342085	2.72073e-12	3.50511e-11
novel.296	-	0.550824	2.79652e-12	3.60008e-11
ENSRNOG00000003587	Vegfd	-0.755269	2.85473e-12	3.6723e-11
ENSRNOG00000009636	Scrn1	-0.511466	2.86713e-12	3.68553e-11
ENSRNOG00000005053	Egln3	0.484231	3.06108e-12	3.93192e-11
ENSRNOG00000004516	Itgbl1	-0.484771	3.16994e-12	4.06875e-11
ENSRNOG00000025198	Gas2l3	0.780983	3.21481e-12	4.1233e-11
ENSRNOG00000031896	Stt3a	-0.354778	3.27591e-12	4.19858e-11
ENSRNOG00000005082	Irf6	0.566576	3.3368e-12	4.27181e-11
ENSRNOG00000026589	Dpy19l1	-0.41627	3.33796e-12	4.27181e-11
ENSRNOG00000004221	Lgr5	0.905943	3.45835e-12	4.42262e-11
ENSRNOG00000004932	Sel1l3	-0.669775	3.46531e-12	4.42827e-11
ENSRNOG00000013160	Sash1	-0.389959	3.69425e-12	4.71736e-11
ENSRNOG00000021264	Pcna	0.40616	3.7449e-12	4.77853e-11
ENSRNOG00000002171	Phldb2	-0.860858	3.7758e-12	4.81442e-11
ENSRNOG00000000894	Fry	0.41708	3.83037e-12	4.88042e-11
ENSRNOG00000002425	Pctp	0.568533	3.88373e-12	4.94479e-11
ENSRNOG00000029980	Zbtb16	0.818381	3.90828e-12	4.97241e-11
ENSRNOG00000021155	Ctsk	-0.257143	3.93903e-12	5.00787e-11
ENSRNOG00000000442	Notch4	-0.386841	3.99828e-12	5.07947e-11
ENSRNOG00000049484	Atp9a	0.400628	4.1825e-12	5.30963e-11
ENSRNOG00000010161	Myo10	-0.401154	4.23085e-12	5.36711e-11
ENSRNOG00000059956	Bcl6b	-0.612956	4.93437e-12	6.255e-11
ENSRNOG00000000485	Bak1	-0.472586	4.98586e-12	6.31566e-11
ENSRNOG00000000130	Dnajb5	0.410957	4.9977e-12	6.32606e-11
ENSRNOG00000048222	Nlrc5	-0.630276	5.03291e-12	6.36599e-11
ENSRNOG00000002365	Itm2a	-0.280847	5.33835e-12	6.74308e-11
ENSRNOG00000028872	Rai14	-0.457887	5.33879e-12	6.74308e-11
ENSRNOG00000012258	Rras2	-0.59894	5.47611e-12	6.91151e-11
ENSRNOG00000014320	Inhba	-1.37191	5.50985e-12	6.94904e-11
ENSRNOG00000002389	Morf4l2	-0.295176	5.64552e-12	7.11499e-11
ENSRNOG00000013867	Fgf1	0.780305	5.85486e-12	7.37348e-11
ENSRNOG00000011145	Crhr2	0.578972	5.89401e-12	7.41741e-11
ENSRNOG00000016099	Id4	0.546138	6.05918e-12	7.61975e-11
ENSRNOG00000009545	Polr1a	0.54626	6.15425e-12	7.73373e-11
ENSRNOG00000016733	Rab13	-0.547877	6.40115e-12	8.03818e-11
ENSRNOG00000008944	Ext2	-0.343922	6.41715e-12	8.05245e-11
ENSRNOG00000059460	Ttc30b	0.767704	6.46268e-12	8.10013e-11
ENSRNOG00000054274	Cacnb3	-0.50893	6.46446e-12	8.10013e-11
ENSRNOG00000004279	Adgra3	0.409818	6.63482e-12	8.30762e-11
ENSRNOG00000002636	Abat	1.95367	6.65833e-12	8.33106e-11
ENSRNOG00000009471	Epsti1	-0.737925	6.71483e-12	8.39571e-11
ENSRNOG00000016110	Kcnk12	-1.54448	6.76668e-12	8.45446e-11
ENSRNOG00000009778	Tmem59	-0.298774	7.04431e-12	8.79502e-11
ENSRNOG00000008245	Ptgis	-0.828862	7.22021e-12	9.00496e-11
ENSRNOG00000009730	Cyp7b1	-0.999199	7.22282e-12	9.00496e-11
ENSRNOG00000003226	Mprip	-0.240984	7.34604e-12	9.15203e-11
ENSRNOG00000048617	Ensa	0.361477	7.37861e-12	9.18603e-11
ENSRNOG00000050848	Dtx1	1.2735	7.42383e-12	9.23571e-11
ENSRNOG00000014333	Vcam1	-0.676098	7.56698e-12	9.40707e-11
ENSRNOG00000014424	RGD1563354	1.16135	7.72076e-12	9.59139e-11
ENSRNOG00000030118	Msn	-0.24991	7.8788e-12	9.78074e-11
ENSRNOG00000018170	Slc27a1	0.367244	7.95833e-12	9.87242e-11
ENSRNOG00000004783	Fam171b	-1.09769	8.23334e-12	1.02063e-10
ENSRNOG00000054549	Lss	0.451276	8.30282e-12	1.02851e-10
ENSRNOG00000055314	Msrb1	0.402332	8.39118e-12	1.03872e-10
ENSRNOG00000015644	Ugcg	-0.444733	8.45147e-12	1.04543e-10
ENSRNOG00000008022	Apaf1	-0.623647	9.04357e-12	1.11788e-10
ENSRNOG00000032929	Incenp	0.624079	9.20906e-12	1.13753e-10
ENSRNOG00000003104	Trpv2	0.513537	9.84597e-12	1.21534e-10
ENSRNOG00000004197	Asb12	0.771012	1.01129e-11	1.2474e-10
ENSRNOG00000014666	Tfeb	0.381983	1.02756e-11	1.26657e-10
ENSRNOG00000002347	Rgl1	-0.34302	1.07988e-11	1.33012e-10
ENSRNOG00000019758	Ipo13	0.453463	1.0895e-11	1.34102e-10
ENSRNOG00000016526	Dsg2	0.69645	1.11982e-11	1.37736e-10
ENSRNOG00000024580	Mamstr	0.720686	1.13595e-11	1.39621e-10
ENSRNOG00000038001	Slc25a1	0.401088	1.16688e-11	1.43322e-10
ENSRNOG00000010824	Parp8	-0.560856	1.25158e-11	1.53616e-10
ENSRNOG00000025781	Sec31b	1.05173	1.26244e-11	1.54841e-10
ENSRNOG00000019494	Psmb10	-0.56901	1.26344e-11	1.54854e-10
ENSRNOG00000020667	Shisa5	-0.322819	1.27988e-11	1.56758e-10
ENSRNOG00000012641	Sfr1	-0.386849	1.28374e-11	1.57064e-10
ENSRNOG00000060949	Anxa8	0.300627	1.28418e-11	1.57064e-10
ENSRNOG00000010457	Vash1	-0.577505	1.30839e-11	1.59817e-10
ENSRNOG00000008000	Syt13	-1.34969	1.30853e-11	1.59817e-10
ENSRNOG00000025448	Limd2	-0.471159	1.32973e-11	1.62292e-10
ENSRNOG00000002420	Zc3h7a	-0.405929	1.3553e-11	1.65297e-10
novel.281	-	-0.866686	1.39546e-11	1.70076e-10
ENSRNOG00000012946	Mov10	-0.532177	1.41903e-11	1.72828e-10
ENSRNOG00000031927	Klk6	1.22956	1.47467e-11	1.79478e-10
ENSRNOG00000006718	Rbm33	0.451783	1.48762e-11	1.80928e-10
ENSRNOG00000009754	Nampt	-0.364392	1.50919e-11	1.83423e-10
ENSRNOG00000009867	Tgfb3	-0.373415	1.51772e-11	1.84331e-10
ENSRNOG00000011981	Slc39a13	-0.480668	1.55681e-11	1.88947e-10
ENSRNOG00000009102	Fermt2	-0.281166	1.55938e-11	1.89126e-10
ENSRNOG00000012929	Wsb1	-0.370413	1.58038e-11	1.91539e-10
ENSRNOG00000008487	Amotl2	-0.365025	1.69651e-11	2.05463e-10
ENSRNOG00000018254	Sncaip	-1.08676	1.69762e-11	2.05463e-10
ENSRNOG00000000843	Ly6g6c	0.942708	1.70951e-11	2.06758e-10
ENSRNOG00000015033	Mxd4	-0.275304	1.733e-11	2.09454e-10
ENSRNOG00000012575	Fat2	0.622048	1.82641e-11	2.2059e-10
ENSRNOG00000002680	Lamc1	-0.253396	1.8322e-11	2.21135e-10
ENSRNOG00000019422	Egr1	-0.322257	1.8587e-11	2.24178e-10
novel.1089	-	-0.659539	1.88054e-11	2.26655e-10
ENSRNOG00000011526	Pcsk6	-0.594235	1.90755e-11	2.29752e-10
ENSRNOG00000026941	Tril	-0.398428	1.92572e-11	2.3178e-10
ENSRNOG00000006753	Tgm3	-0.421931	1.9564e-11	2.35304e-10
ENSRNOG00000006060	Matn2	0.403587	1.95771e-11	2.35304e-10
ENSRNOG00000061379	C7	-0.413306	2.00806e-11	2.4119e-10
ENSRNOG00000012791	Ajuba	0.337421	2.06461e-11	2.4781e-10
ENSRNOG00000009343	Evpl	0.529028	2.12063e-11	2.54198e-10
ENSRNOG00000024886	Ext1	-0.410228	2.12075e-11	2.54198e-10
ENSRNOG00000009997	Erap1	-0.477455	2.15948e-11	2.58662e-10
ENSRNOG00000054458	Kcnmb4	1.10563	2.18377e-11	2.61392e-10
ENSRNOG00000019799	Pcdhgc3	-0.414418	2.1957e-11	2.62638e-10
ENSRNOG00000060773	Sertad4	-0.51986	2.19975e-11	2.62942e-10
ENSRNOG00000022523	Fkbp5	0.382355	2.20231e-11	2.63067e-10
ENSRNOG00000001424	Cux1	0.596277	2.22035e-11	2.65041e-10
ENSRNOG00000004280	Tcn2	-0.427679	2.2847e-11	2.72535e-10
ENSRNOG00000028945	Tmem182	-0.466121	2.36974e-11	2.82264e-10
ENSRNOG00000012975	Ggcx	-0.465387	2.37099e-11	2.82264e-10
ENSRNOG00000020953	Ms4a7	-0.855726	2.37113e-11	2.82264e-10
ENSRNOG00000009205	Lmo4	0.36267	2.42204e-11	2.88127e-10
ENSRNOG00000003494	Ppfia4	-0.683907	2.47638e-11	2.94389e-10
ENSRNOG00000046834	C3	0.476638	2.47902e-11	2.94502e-10
ENSRNOG00000014226	Plch2	0.794866	2.54833e-11	3.0253e-10
ENSRNOG00000023226	S100a10	-0.289717	2.63723e-11	3.1287e-10
ENSRNOG00000018445	Agt	0.593818	2.65458e-11	3.14713e-10
ENSRNOG00000018668	Glg1	-0.290289	2.80994e-11	3.32905e-10
ENSRNOG00000016629	Zcchc6	-0.409051	2.86113e-11	3.38739e-10
ENSRNOG00000028930	Dab2	-0.525736	2.88558e-11	3.41401e-10
ENSRNOG00000042886	Rps28	-0.349649	2.9171e-11	3.44896e-10
ENSRNOG00000022637	AABR07052585.1	1.01614	2.99e-11	3.53275e-10
ENSRNOG00000052579	Sox21	1.37872	3.08489e-11	3.64239e-10
ENSRNOG00000001888	Arvcf	0.497255	3.10214e-11	3.66027e-10
ENSRNOG00000008236	Decr1	0.480817	3.13855e-11	3.70073e-10
ENSRNOG00000037931	Plaur	-0.523689	3.22869e-11	3.80443e-10
ENSRNOG00000020653	S1pr2	-0.498926	3.42742e-11	4.03587e-10
ENSRNOG00000028353	Sox13	0.418777	3.54777e-11	4.17475e-10
ENSRNOG00000016257	Cotl1	-0.299018	3.57162e-11	4.19997e-10
ENSRNOG00000006859	Insig1	0.444278	3.59469e-11	4.22425e-10
ENSRNOG00000014564	Yipf5	-0.397597	3.60019e-11	4.22785e-10
ENSRNOG00000039596	Prob1	0.561725	3.61691e-11	4.24462e-10
ENSRNOG00000015807	Pyroxd2	-0.417942	3.61957e-11	4.24488e-10
ENSRNOG00000011284	Sgms2	0.891514	3.64817e-11	4.27553e-10
ENSRNOG00000019609	B4galt2	-0.564048	3.96993e-11	4.64949e-10
ENSRNOG00000014963	Adgrg1	0.278666	3.98807e-11	4.66759e-10
ENSRNOG00000001992	Atp6v1a	0.378049	4.05672e-11	4.74476e-10
ENSRNOG00000000567	Unc5b	0.374135	4.27234e-11	4.99358e-10
ENSRNOG00000017146	Nfatc1	0.399896	4.27572e-11	4.99418e-10
ENSRNOG00000016433	Prrc1	-0.466825	4.37488e-11	5.10657e-10
ENSRNOG00000020225	Dlgap4	-0.367821	4.40865e-11	5.14253e-10
ENSRNOG00000005034	Arhgef25	-0.368456	4.45792e-11	5.19653e-10
ENSRNOG00000001828	Stk38l	-0.420963	4.50859e-11	5.25207e-10
ENSRNOG00000004540	Clec3b	-0.336519	4.54839e-11	5.29488e-10
ENSRNOG00000017114	Synj2	-0.559465	4.57119e-11	5.31787e-10
ENSRNOG00000028415	Cdc20	0.660534	4.60881e-11	5.35805e-10
ENSRNOG00000017560	Mdk	-0.458664	4.73916e-11	5.50591e-10
ENSRNOG00000025705	Armcx2	-0.649993	4.80932e-11	5.58369e-10
ENSRNOG00000017602	Il34	-0.581872	4.97939e-11	5.77728e-10
ENSRNOG00000020129	Cdh3	0.441153	5.01374e-11	5.81326e-10
ENSRNOG00000006327	Rcc2	0.390564	5.13077e-11	5.945e-10
ENSRNOG00000027731	Ubxn10	2.67102	5.16284e-11	5.97817e-10
ENSRNOG00000001769	Tnk2	0.350985	5.19063e-11	6.00635e-10
ENSRNOG00000007151	Cdk14	-0.521584	5.28711e-11	6.11392e-10
ENSRNOG00000011696	Lifr	0.540352	5.31255e-11	6.13926e-10
ENSRNOG00000014966	LOC690000	-0.428721	5.39497e-11	6.23037e-10
ENSRNOG00000016592	Gnai2	-0.214087	5.4052e-11	6.23804e-10
ENSRNOG00000011475	Srcin1	0.706385	5.50553e-11	6.34962e-10
ENSRNOG00000011763	Serp1	-0.28755	5.68483e-11	6.55206e-10
ENSRNOG00000046683	Lilrb3	0.417271	6.01742e-11	6.93079e-10
ENSRNOG00000005392	Ngfr	0.452897	6.18642e-11	7.12073e-10
ENSRNOG00000021053	Lsr	0.586555	6.54186e-11	7.52487e-10
ENSRNOG00000052745	Met	0.716785	6.6082e-11	7.59616e-10
ENSRNOG00000004132	Lasp1	-0.243473	6.67893e-11	7.67239e-10
ENSRNOG00000020776	Dhcr7	0.581662	6.92359e-11	7.94819e-10
ENSRNOG00000008305	Sc5d	0.663088	6.93719e-11	7.95855e-10
ENSRNOG00000016961	Rps27	-0.255368	6.99415e-11	8.0186e-10
ENSRNOG00000031085	Ergic3	-0.27216	7.02488e-11	8.04853e-10
ENSRNOG00000009686	Aqp7	0.879608	7.07895e-11	8.10514e-10
ENSRNOG00000017209	Tubb3	-1.03159	7.13192e-11	8.16042e-10
ENSRNOG00000014936	Ifitm2	-0.303284	7.2278e-11	8.26468e-10
ENSRNOG00000031824	Slc44a2	0.24991	7.67824e-11	8.77397e-10
ENSRNOG00000020580	LOC500956	-0.624742	7.68455e-11	8.77542e-10
ENSRNOG00000028137	Mki67	0.477934	7.70687e-11	8.79514e-10
ENSRNOG00000005229	Sec16b	-0.770311	7.80816e-11	8.90489e-10
ENSRNOG00000005711	Ptprd	-0.622353	7.82214e-11	8.91498e-10
ENSRNOG00000046366	Dmd	0.407102	7.83006e-11	8.91817e-10
ENSRNOG00000011026	Irf2bpl	0.30445	7.89974e-11	8.99164e-10
ENSRNOG00000023317	Colgalt1	-0.317623	8.13378e-11	9.25198e-10
ENSRNOG00000012852	Bin1	0.213299	8.3467e-11	9.48796e-10
ENSRNOG00000037080	Adamts17	-0.652257	8.47956e-11	9.63269e-10
ENSRNOG00000033316	Foxo4	0.355259	8.79729e-11	9.98711e-10
ENSRNOG00000021041	Fam171a2	-0.392956	8.80809e-11	9.99284e-10
ENSRNOG00000021018	Batf2	-1.47831	8.9507e-11	1.0148e-09
[truncated: 5,017 more rows]

## Sheet: marked information
Title of manuscript	Huangbai liniment accelerated wound healing by activating Nrf2 signaling in diabetes
[truncated: 1 more rows]
